# Supplementary material for: Training Population Design With the Use of Regional Fusarium Head Blight Nurseries to Predict Independent Breeding Lines for FHB Traits
Source: PubMed Central journal article supplement (PMC7381120; doi:10.3389/fpls.2020.01083), 2020-07-16
Supplement: DataSheet_1.pdf [file DataSheet_1.pdf]

**Figure S1:** Uniform Northern and Uniform Southern Scab Nursery (NUS-SUS) for 2014-2018. Each environment is a combination of year/location. Severity, FDK and DON data is the average between two replications for each genotype.

NA: Data not recorded

| YEAR | TEST | ENV         | ENTR | GENOTYPE          | SEVERIT | FDK  | DON |
|------|------|-------------|------|-------------------|---------|------|-----|
|      |      |             | Y    |                   | Y       |      |     |
| 2014 | NUS  | 2014_VA_BLA | 1    | TRUMAN            | 13.7    | 2.7  | 1.2 |
| 2014 | NUS  | 2014_VA_BLA | 2    | ERNIE             | 20.5    | 4.5  | 0.5 |
| 2014 | NUS  | 2014_VA_BLA | 3    | FREEDOM           | 28.1    | 15.0 | 4.6 |
| 2014 | NUS  | 2014_VA_BLA | 4    | PIONEER2545       | 57.9    | 18.3 | 6.3 |
| 2014 | NUS  | 2014_VA_BLA | 5    | NY01016-AN        | 50.0    | 12.1 | 2.7 |
| 2014 | NUS  | 2014_VA_BLA | 6    | NY01066-278       | 46.0    | 16.5 | 7.5 |
| 2014 | NUS  | 2014_VA_BLA | 7    | NY99059-249       | 42.5    | 6.3  | 1.3 |
| 2014 | NUS  | 2014_VA_BLA | 8    | NY99069-249       | 31.2    | 7.5  | 3.1 |
| 2014 | NUS  | 2014_VA_BLA | 9    | NY99069-352       | 51.2    | 12.9 | 4.6 |
| 2014 | NUS  | 2014_VA_BLA | 10   | KWS023            | 14.0    | 5.0  | 0.4 |
| 2014 | NUS  | 2014_VA_BLA | 11   | KWS024            | 39.7    | 25.5 | 4.0 |
| 2014 | NUS  | 2014_VA_BLA | 12   | KWS025            | 74.5    | 6.4  | 3.0 |
| 2014 | NUS  | 2014_VA_BLA | 13   | KWS028            | 55.2    | 7.6  | 1.8 |
| 2014 | NUS  | 2014_VA_BLA | 14   | L29230            | 18.5    | 7.5  | 0.4 |
| 2014 | NUS  | 2014_VA_BLA | 15   | LCS321            | 41.0    | 6.7  | 3.5 |
| 2014 | NUS  | 2014_VA_BLA | 16   | E6012             | 48.7    | 2.7  | 1.9 |
| 2014 | NUS  | 2014_VA_BLA | 17   | F0036R            | 65.2    | 18.4 | 7.1 |
| 2014 | NUS  | 2014_VA_BLA | 18   | F0039             | 70.5    | 25.6 | 7.1 |
| 2014 | NUS  | 2014_VA_BLA | 19   | F1014             | 20.1    | 21.0 | 3.6 |
| 2014 | NUS  | 2014_VA_BLA | 20   | OH07-263-3        | 22.2    | 13.7 | 1.3 |
| 2014 | NUS  | 2014_VA_BLA | 21   | OH08-206-69       | 64.5    | 4.5  | 1.6 |
| 2014 | NUS  | 2014_VA_BLA | 22   | OH08-269-58       | 41.5    | 21.2 | 2.6 |
| 2014 | NUS  | 2014_VA_BLA | 23   | 0570A1-2-32-5-1-4 | 26.9    | 14.8 | 1.5 |
| 2014 | NUS  | 2014_VA_BLA | 24   | 0762A1-2-8        | 19.6    | 5.6  | 0.7 |
| 2014 | NUS  | 2014_VA_BLA | 25   | 08334A1-31        | 22.0    | 6.0  | 0.7 |
| 2014 | NUS  | 2014_VA_BLA | 26   | 10641B1-9-11-7    | 21.8    | 3.5  | 0.4 |
| 2014 | NUS  | 2014_VA_BLA | 27   | B08-91993         | 20.3    | 1.0  | 0.8 |
| 2014 | NUS  | 2014_VA_BLA | 28   | B09-900256        | 45.1    | 11.5 | 3.7 |
| 2014 | NUS  | 2014_VA_BLA | 29   | M09L-9547         | 44.8    | 7.5  | 2.6 |
| 2014 | NUS  | 2014_VA_BLA | 30   | M10-1100          | 29.9    | 17.0 | 4.8 |
| 2014 | NUS  | 2014_VA_BLA | 31   | M11-1027          | 39.1    | 19.5 | 3.0 |
| 2014 | NUS  | 2014_VA_BLA | 32   | M11-2298          | 28.6    | 8.5  | 2.1 |
| 2014 | NUS  | 2014_VA_BLA | 33   | GL133             | 18.5    | 3.8  | 3.0 |
| 2014 | NUS  | 2014_VA_BLA | 34   | GL164             | 24.8    | 15.0 | 3.4 |
| 2014 | NUS  | 2014_VA_BLA | 35   | UGRCC2-78         | 50.1    | 13.0 | 4.9 |
| 2014 | NUS  | 2014_VA_BLA | 36   | UGRCC5-116        | 42.2    | 19.0 | 0.6 |
| 2014 | NUS  | 2014_VA_BLA | 37   | IL09-24328        | 21.4    | 2.9  | 0.2 |
| 2014 | NUS  | 2014_VA_BLA | 38   | IL09-3264         | 12.6    | 5.0  | 0.1 |
| 2014 | NUS  | 2014_VA_BLA | 39   | IL10-19464        | 12.9    | 3.0  | 0.7 |
| 2014 | NUS  | 2014_VA_BLA | 40   | IL10-6855         | 15.9    | 4.0  | 1.1 |
| 2014 | NUS  | 2014_VA_BLA | 41   | KY05C-1020-4-6-5  | 21.8    | 9.0  | 1.7 |
| 2014 | NUS  | 2014_VA_BLA | 42   | KY05C-1105-43-6-1 | 26.9    | 5.1  | 1.7 |

|      |     |             |    |                    |      |      |     |
|------|-----|-------------|----|--------------------|------|------|-----|
| 2014 | NUS | 2014_VA_BLA | 43 | KY06C-3003-43-13-3 | 27.7 | 8.0  | 3.2 |
| 2014 | NUS | 2014_VA_BLA | 44 | KY204604           | 51.9 | 19.0 | 5.2 |
| 2014 | NUS | 2014_VA_BLA | 45 | MD08-22-22-13-4    | 13.2 | 2.0  | 0.7 |
| 2014 | NUS | 2014_VA_BLA | 46 | MD08-22-22-13-10   | 11.8 | 4.1  | 1.4 |
| 2014 | NUS | 2014_VA_BLA | 47 | MD09W272-8-4-13-3  | 27.6 | 3.5  | 3.3 |
| 2014 | NUS | 2014_VA_BLA | 48 | MDC07026-12-28     | 13.1 | 2.5  | 0.1 |
| 2014 | NUS | 2014_VA_BLA | 49 | MO120194           | 11.9 | 7.5  | 0.4 |
| 2014 | NUS | 2014_VA_BLA | 50 | MO120452           | 16.1 | 7.0  | 1.2 |
| 2014 | NUS | 2014_VA_BLA | 51 | MO120794           | 19.6 | 3.9  | 2.1 |
| 2014 | NUS | 2014_VA_BLA | 52 | MO121183           | 36.9 | 5.4  | 2.4 |
| 2014 | NUS | 2014_VA_BLA | 53 | NE06545            | 27.8 | 19.5 | 4.1 |
| 2014 | NUS | 2014_VA_BLA | 54 | NE08499            | 32.3 | 13.1 | 2.4 |
| 2014 | NUS | 2014_VA_BLA | 55 | NE10478            | 34.4 | 7.7  | 0.5 |
| 2014 | NUS | 2014_VA_BLA | 56 | NI12702W           | 47.4 | 11.0 | 4.7 |
| 2014 | NUS | 2014_VA_BLA | 57 | VA10W-140          | 46.6 | 4.5  | 2.0 |
| 2014 | NUS | 2014_VA_BLA | 58 | VA11W-106          | 52.2 | 4.8  | 2.2 |
| 2014 | NUS | 2014_VA_BLA | 59 | VA11W-301          | 50.6 | 16.4 | 6.1 |
| 2014 | NUS | 2014_VA_BLA | 60 | VA12FHB-53         | 38.7 | 6.5  | 1.5 |
| 2014 | NUS | 2014_IL_CHA | 1  | TRUMAN             | 12.5 | NA   | NA  |
| 2014 | NUS | 2014_IL_CHA | 2  | ERNIE              | 27.5 | NA   | NA  |
| 2014 | NUS | 2014_IL_CHA | 3  | FREEDOM            | 27.5 | NA   | NA  |
| 2014 | NUS | 2014_IL_CHA | 4  | PIONEER2545        | 45.0 | NA   | NA  |
| 2014 | NUS | 2014_IL_CHA | 5  | NY01016-AN         | 50.0 | NA   | NA  |
| 2014 | NUS | 2014_IL_CHA | 6  | NY01066-278        | 50.0 | NA   | NA  |
| 2014 | NUS | 2014_IL_CHA | 7  | NY99059-249        | 45.0 | NA   | NA  |
| 2014 | NUS | 2014_IL_CHA | 8  | NY99069-249        | 35.0 | NA   | NA  |
| 2014 | NUS | 2014_IL_CHA | 9  | NY99069-352        | 30.0 | NA   | NA  |
| 2014 | NUS | 2014_IL_CHA | 10 | KWS023             | 35.0 | NA   | NA  |
| 2014 | NUS | 2014_IL_CHA | 11 | KWS024             | 35.0 | NA   | NA  |
| 2014 | NUS | 2014_IL_CHA | 12 | KWS025             | 55.0 | NA   | NA  |
| 2014 | NUS | 2014_IL_CHA | 13 | KWS028             | 32.5 | NA   | NA  |
| 2014 | NUS | 2014_IL_CHA | 14 | L29230             | 47.5 | NA   | NA  |
| 2014 | NUS | 2014_IL_CHA | 15 | LCS321             | 32.5 | NA   | NA  |
| 2014 | NUS | 2014_IL_CHA | 16 | E6012              | 27.5 | NA   | NA  |
| 2014 | NUS | 2014_IL_CHA | 17 | F0036R             | 35.0 | NA   | NA  |
| 2014 | NUS | 2014_IL_CHA | 18 | F0039              | 45.0 | NA   | NA  |
| 2014 | NUS | 2014_IL_CHA | 19 | F1014              | 20.0 | NA   | NA  |
| 2014 | NUS | 2014_IL_CHA | 20 | OH07-263-3         | 30.0 | NA   | NA  |
| 2014 | NUS | 2014_IL_CHA | 21 | OH08-206-69        | 30.0 | NA   | NA  |
| 2014 | NUS | 2014_IL_CHA | 22 | OH08-269-58        | 25.0 | NA   | NA  |
| 2014 | NUS | 2014_IL_CHA | 23 | 0570A1-2-32-5-1-4  | 20.0 | NA   | NA  |
| 2014 | NUS | 2014_IL_CHA | 24 | 0762A1-2-8         | 10.0 | NA   | NA  |
| 2014 | NUS | 2014_IL_CHA | 25 | 08334A1-31         | 35.0 | NA   | NA  |
| 2014 | NUS | 2014_IL_CHA | 26 | 10641B1-9-11-7     | 20.0 | NA   | NA  |
| 2014 | NUS | 2014_IL_CHA | 27 | B08-91993          | 42.5 | NA   | NA  |
| 2014 | NUS | 2014_IL_CHA | 28 | B09-900256         | 30.0 | NA   | NA  |
| 2014 | NUS | 2014_IL_CHA | 29 | M09L-9547          | 17.5 | NA   | NA  |
| 2014 | NUS | 2014_IL_CHA | 30 | M10-1100           | 20.0 | NA   | NA  |
| 2014 | NUS | 2014_IL_CHA | 31 | M11-1027           | 32.5 | NA   | NA  |

|      |     |             |    |                    |      |    |    |
|------|-----|-------------|----|--------------------|------|----|----|
| 2014 | NUS | 2014_IL_CHA | 32 | M11-2298           | 15.0 | NA | NA |
| 2014 | NUS | 2014_IL_CHA | 33 | GL133              | 42.5 | NA | NA |
| 2014 | NUS | 2014_IL_CHA | 34 | GL164              | 22.5 | NA | NA |
| 2014 | NUS | 2014_IL_CHA | 35 | UGRCC2-78          | 50.0 | NA | NA |
| 2014 | NUS | 2014_IL_CHA | 36 | UGRCC5-116         | 32.5 | NA | NA |
| 2014 | NUS | 2014_IL_CHA | 37 | IL09-24328         | 12.5 | NA | NA |
| 2014 | NUS | 2014_IL_CHA | 38 | IL09-3264          | 25.0 | NA | NA |
| 2014 | NUS | 2014_IL_CHA | 39 | IL10-19464         | 15.0 | NA | NA |
| 2014 | NUS | 2014_IL_CHA | 40 | IL10-6855          | 20.0 | NA | NA |
| 2014 | NUS | 2014_IL_CHA | 41 | KY05C-1020-4-6-5   | 5.0  | NA | NA |
| 2014 | NUS | 2014_IL_CHA | 42 | KY05C-1105-43-6-1  | 10.0 | NA | NA |
| 2014 | NUS | 2014_IL_CHA | 43 | KY06C-3003-43-13-3 | 20.0 | NA | NA |
| 2014 | NUS | 2014_IL_CHA | 44 | KY204604           | 60.0 | NA | NA |
| 2014 | NUS | 2014_IL_CHA | 45 | MD08-22-22-13-4    | 4.0  | NA | NA |
| 2014 | NUS | 2014_IL_CHA | 46 | MD08-22-22-13-10   | 4.0  | NA | NA |
| 2014 | NUS | 2014_IL_CHA | 47 | MD09W272-8-4-13-3  | 30.0 | NA | NA |
| 2014 | NUS | 2014_IL_CHA | 48 | MDC07026-12-28     | 20.0 | NA | NA |
| 2014 | NUS | 2014_IL_CHA | 49 | MO120194           | 7.5  | NA | NA |
| 2014 | NUS | 2014_IL_CHA | 50 | MO120452           | 32.5 | NA | NA |
| 2014 | NUS | 2014_IL_CHA | 51 | MO120794           | 10.0 | NA | NA |
| 2014 | NUS | 2014_IL_CHA | 52 | MO121183           | 7.5  | NA | NA |
| 2014 | NUS | 2014_IL_CHA | 53 | NE06545            | 12.5 | NA | NA |
| 2014 | NUS | 2014_IL_CHA | 54 | NE08499            | 25.0 | NA | NA |
| 2014 | NUS | 2014_IL_CHA | 55 | NE10478            | 25.0 | NA | NA |
| 2014 | NUS | 2014_IL_CHA | 56 | NI12702W           | 30.0 | NA | NA |
| 2014 | NUS | 2014_IL_CHA | 57 | VA10W-140          | 45.0 | NA | NA |
| 2014 | NUS | 2014_IL_CHA | 58 | VA11W-106          | 12.5 | NA | NA |
| 2014 | NUS | 2014_IL_CHA | 59 | VA11W-301          | 42.5 | NA | NA |
| 2014 | NUS | 2014_IL_CHA | 60 | VA12FHB-53         | 12.5 | NA | NA |
| 2014 | NUS | 2014_MO_CO  |    |                    |      |    |    |
| 2014 | NUS | L           | 1  | TRUMAN             | 10.5 | NA | NA |
| 2014 | NUS | 2014_MO_CO  |    |                    |      |    |    |
| 2014 | NUS | L           | 2  | ERNIE              | 21.7 | NA | NA |
| 2014 | NUS | 2014_MO_CO  |    |                    |      |    |    |
| 2014 | NUS | L           | 3  | FREEDOM            | 25.9 | NA | NA |
| 2014 | NUS | 2014_MO_CO  |    |                    |      |    |    |
| 2014 | NUS | L           | 4  | PIONEER2545        | 65.6 | NA | NA |
| 2014 | NUS | 2014_MO_CO  |    |                    |      |    |    |
| 2014 | NUS | L           | 5  | NY01016-AN         | 14.1 | NA | NA |
| 2014 | NUS | 2014_MO_CO  |    |                    |      |    |    |
| 2014 | NUS | L           | 6  | NY01066-278        | 16.2 | NA | NA |
| 2014 | NUS | 2014_MO_CO  |    |                    |      |    |    |
| 2014 | NUS | L           | 7  | NY99059-249        | 16.2 | NA | NA |
| 2014 | NUS | 2014_MO_CO  |    |                    |      |    |    |
| 2014 | NUS | L           | 8  | NY99069-249        | 67.6 | NA | NA |
| 2014 | NUS | 2014_MO_CO  |    |                    |      |    |    |
| 2014 | NUS | L           | 9  | NY99069-352        | 11.4 | NA | NA |
| 2014 | NUS | 2014_MO_CO  |    |                    |      |    |    |
| 2014 | NUS | L           | 10 | KWS023             | 32.1 | NA | NA |
| 2014 | NUS | 2014_MO_CO  |    |                    |      |    |    |
| 2014 | NUS | L           | 11 | KWS024             | 37.7 | NA | NA |

|      |     |                 |    |                   |      |    |    |
|------|-----|-----------------|----|-------------------|------|----|----|
| 2014 | NUS | 2014_MO_CO<br>L | 12 | KWS025            | 21.0 | NA | NA |
| 2014 | NUS | 2014_MO_CO<br>L | 13 | KWS028            | 24.8 | NA | NA |
| 2014 | NUS | 2014_MO_CO<br>L | 14 | L29230            | 36.3 | NA | NA |
| 2014 | NUS | 2014_MO_CO<br>L | 15 | LCS321            | 44.6 | NA | NA |
| 2014 | NUS | 2014_MO_CO<br>L | 16 | E6012             | 17.0 | NA | NA |
| 2014 | NUS | 2014_MO_CO<br>L | 17 | F0036R            | 11.7 | NA | NA |
| 2014 | NUS | 2014_MO_CO<br>L | 18 | F0039             | 58.5 | NA | NA |
| 2014 | NUS | 2014_MO_CO<br>L | 19 | F1014             | 40.5 | NA | NA |
| 2014 | NUS | 2014_MO_CO<br>L | 20 | OH07-263-3        | 52.6 | NA | NA |
| 2014 | NUS | 2014_MO_CO<br>L | 21 | OH08-206-69       | 31.6 | NA | NA |
| 2014 | NUS | 2014_MO_CO<br>L | 22 | OH08-269-58       | 48.6 | NA | NA |
| 2014 | NUS | 2014_MO_CO<br>L | 23 | 0570A1-2-32-5-1-4 | 12.8 | NA | NA |
| 2014 | NUS | 2014_MO_CO<br>L | 24 | 0762A1-2-8        | 10.3 | NA | NA |
| 2014 | NUS | 2014_MO_CO<br>L | 25 | 08334A1-31        | 24.5 | NA | NA |
| 2014 | NUS | 2014_MO_CO<br>L | 26 | 10641B1-9-11-7    | 23.4 | NA | NA |
| 2014 | NUS | 2014_MO_CO<br>L | 27 | B08-91993         | 47.0 | NA | NA |
| 2014 | NUS | 2014_MO_CO<br>L | 28 | B09-900256        | 8.4  | NA | NA |
| 2014 | NUS | 2014_MO_CO<br>L | 29 | M09L-9547         | 37.4 | NA | NA |
| 2014 | NUS | 2014_MO_CO<br>L | 30 | M10-1100          | 40.4 | NA | NA |
| 2014 | NUS | 2014_MO_CO<br>L | 31 | M11-1027          | 25.7 | NA | NA |
| 2014 | NUS | 2014_MO_CO<br>L | 32 | M11-2298          | 32.6 | NA | NA |
| 2014 | NUS | 2014_MO_CO<br>L | 33 | GL133             | 38.8 | NA | NA |
| 2014 | NUS | 2014_MO_CO<br>L | 34 | GL164             | 60.8 | NA | NA |
| 2014 | NUS | 2014_MO_CO<br>L | 35 | UGRCC2-78         | 62.4 | NA | NA |
| 2014 | NUS | 2014_MO_CO<br>L | 36 | UGRCC5-116        | 37.0 | NA | NA |
| 2014 | NUS | 2014_MO_CO<br>L | 37 | IL09-24328        | 20.5 | NA | NA |
| 2014 | NUS | 2014_MO_CO<br>L | 38 | IL09-3264         | 17.2 | NA | NA |
| 2014 | NUS | 2014_MO_CO<br>L | 39 | IL10-19464        | 26.6 | NA | NA |

|      |     |                 |    |                    |      |      |      |
|------|-----|-----------------|----|--------------------|------|------|------|
| 2014 | NUS | 2014_MO_CO<br>L | 40 | IL10-6855          | 10.0 | NA   | NA   |
| 2014 | NUS | 2014_MO_CO<br>L | 41 | KY05C-1020-4-6-5   | 18.2 | NA   | NA   |
| 2014 | NUS | 2014_MO_CO<br>L | 42 | KY05C-1105-43-6-1  | 23.6 | NA   | NA   |
| 2014 | NUS | 2014_MO_CO<br>L | 43 | KY06C-3003-43-13-3 | 57.1 | NA   | NA   |
| 2014 | NUS | 2014_MO_CO<br>L | 44 | KY204604           | 31.6 | NA   | NA   |
| 2014 | NUS | 2014_MO_CO<br>L | 45 | MD08-22-22-13-4    | 31.3 | NA   | NA   |
| 2014 | NUS | 2014_MO_CO<br>L | 46 | MD08-22-22-13-10   | 11.0 | NA   | NA   |
| 2014 | NUS | 2014_MO_CO<br>L | 47 | MD09W272-8-4-13-3  | 15.9 | NA   | NA   |
| 2014 | NUS | 2014_MO_CO<br>L | 48 | MDC07026-12-28     | 14.7 | NA   | NA   |
| 2014 | NUS | 2014_MO_CO<br>L | 49 | MO120194           | 18.8 | NA   | NA   |
| 2014 | NUS | 2014_MO_CO<br>L | 50 | MO120452           | 31.8 | NA   | NA   |
| 2014 | NUS | 2014_MO_CO<br>L | 51 | MO120794           | 27.6 | NA   | NA   |
| 2014 | NUS | 2014_MO_CO<br>L | 52 | MO121183           | 18.3 | NA   | NA   |
| 2014 | NUS | 2014_MO_CO<br>L | 53 | NE06545            | 51.0 | NA   | NA   |
| 2014 | NUS | 2014_MO_CO<br>L | 54 | NE08499            | 49.8 | NA   | NA   |
| 2014 | NUS | 2014_MO_CO<br>L | 55 | NE10478            | 35.4 | NA   | NA   |
| 2014 | NUS | 2014_MO_CO<br>L | 56 | NI12702W           | 15.6 | NA   | NA   |
| 2014 | NUS | 2014_MO_CO<br>L | 57 | VA10W-140          | 34.2 | NA   | NA   |
| 2014 | NUS | 2014_MO_CO<br>L | 58 | VA11W-106          | 25.0 | NA   | NA   |
| 2014 | NUS | 2014_MO_CO<br>L | 59 | VA11W-301          | 28.1 | NA   | NA   |
| 2014 | NUS | 2014_MO_CO<br>L | 60 | VA12FHB-53         | 27.5 | NA   | NA   |
| 2014 | NUS | 2014_MI_ELA     | 1  | TRUMAN             | 33.1 | 26.1 | 3.0  |
| 2014 | NUS | 2014_MI_ELA     | 2  | ERNIE              | 59.5 | 30.0 | 9.0  |
| 2014 | NUS | 2014_MI_ELA     | 3  | FREEDOM            | 62.0 | 38.0 | 8.1  |
| 2014 | NUS | 2014_MI_ELA     | 4  | PIONEER2545        | 51.2 | 26.3 | 14.8 |
| 2014 | NUS | 2014_MI_ELA     | 5  | NY01016-AN         | 56.9 | 43.5 | 15.1 |
| 2014 | NUS | 2014_MI_ELA     | 6  | NY01066-278        | 66.1 | 37.1 | 18.4 |
| 2014 | NUS | 2014_MI_ELA     | 7  | NY99059-249        | 52.9 | 21.8 | 13.6 |
| 2014 | NUS | 2014_MI_ELA     | 8  | NY99069-249        | 63.6 | 21.0 | 7.9  |
| 2014 | NUS | 2014_MI_ELA     | 9  | NY99069-352        | 59.4 | 32.5 | 10.5 |
| 2014 | NUS | 2014_MI_ELA     | 10 | KWS023             | 47.9 | 30.6 | 6.4  |
| 2014 | NUS | 2014_MI_ELA     | 11 | KWS024             | 50.5 | 31.8 | 6.0  |
| 2014 | NUS | 2014_MI_ELA     | 12 | KWS025             | 55.2 | 23.1 | 6.2  |

|      |     |             |    |                    |      |      |      |
|------|-----|-------------|----|--------------------|------|------|------|
| 2014 | NUS | 2014_MI_ELA | 13 | KWS028             | 62.3 | 23.6 | 8.2  |
| 2014 | NUS | 2014_MI_ELA | 14 | L29230             | 58.1 | 27.0 | 8.5  |
| 2014 | NUS | 2014_MI_ELA | 15 | LCS321             | 54.3 | 40.5 | 5.9  |
| 2014 | NUS | 2014_MI_ELA | 16 | E6012              | 55.8 | 27.5 | 9.5  |
| 2014 | NUS | 2014_MI_ELA | 17 | F0036R             | 49.8 | 34.3 | 6.4  |
| 2014 | NUS | 2014_MI_ELA | 18 | F0039              | 72.6 | 33.5 | 14.3 |
| 2014 | NUS | 2014_MI_ELA | 19 | F1014              | 35.5 | 19.2 | 6.9  |
| 2014 | NUS | 2014_MI_ELA | 20 | OH07-263-3         | 57.3 | 21.6 | 9.9  |
| 2014 | NUS | 2014_MI_ELA | 21 | OH08-206-69        | 44.3 | 20.0 | 9.0  |
| 2014 | NUS | 2014_MI_ELA | 22 | OH08-269-58        | 67.3 | 52.5 | 8.2  |
| 2014 | NUS | 2014_MI_ELA | 23 | 0570A1-2-32-5-1-4  | 33.6 | 31.0 | 7.6  |
| 2014 | NUS | 2014_MI_ELA | 24 | 0762A1-2-8         | 28.4 | 13.7 | 2.9  |
| 2014 | NUS | 2014_MI_ELA | 25 | 08334A1-31         | 41.9 | 22.6 | 2.8  |
| 2014 | NUS | 2014_MI_ELA | 26 | 10641B1-9-11-7     | 28.5 | 34.0 | 5.6  |
| 2014 | NUS | 2014_MI_ELA | 27 | B08-91993          | 53.5 | 31.2 | 15.2 |
| 2014 | NUS | 2014_MI_ELA | 28 | B09-900256         | 64.4 | 23.5 | 13.1 |
| 2014 | NUS | 2014_MI_ELA | 29 | M09L-9547          | 58.3 | 39.0 | 5.3  |
| 2014 | NUS | 2014_MI_ELA | 30 | M10-1100           | 52.4 | 17.4 | 6.6  |
| 2014 | NUS | 2014_MI_ELA | 31 | M11-1027           | 26.7 | 25.1 | 2.3  |
| 2014 | NUS | 2014_MI_ELA | 32 | M11-2298           | 44.1 | 18.3 | 2.9  |
| 2014 | NUS | 2014_MI_ELA | 33 | GL133              | 55.1 | 29.3 | 5.8  |
| 2014 | NUS | 2014_MI_ELA | 34 | GL164              | 68.0 | 20.2 | 7.7  |
| 2014 | NUS | 2014_MI_ELA | 35 | UGRCC2-78          | 57.0 | 42.0 | 9.5  |
| 2014 | NUS | 2014_MI_ELA | 36 | UGRCC5-116         | 58.1 | 32.0 | 3.2  |
| 2014 | NUS | 2014_MI_ELA | 37 | IL09-24328         | 51.3 | 22.9 | 3.9  |
| 2014 | NUS | 2014_MI_ELA | 38 | IL09-3264          | 43.8 | 20.5 | 2.6  |
| 2014 | NUS | 2014_MI_ELA | 39 | IL10-19464         | 35.3 | 28.6 | 5.8  |
| 2014 | NUS | 2014_MI_ELA | 40 | IL10-6855          | 36.1 | 23.3 | 5.3  |
| 2014 | NUS | 2014_MI_ELA | 41 | KY05C-1020-4-6-5   | 30.4 | 41.9 | 7.2  |
| 2014 | NUS | 2014_MI_ELA | 42 | KY05C-1105-43-6-1  | 50.9 | 17.8 | 1.9  |
| 2014 | NUS | 2014_MI_ELA | 43 | KY06C-3003-43-13-3 | 56.9 | 23.1 | 3.7  |
| 2014 | NUS | 2014_MI_ELA | 44 | KY204604           | 45.4 | 44.4 | 8.2  |
| 2014 | NUS | 2014_MI_ELA | 45 | MD08-22-22-13-4    | 18.4 | 15.0 | 1.5  |
| 2014 | NUS | 2014_MI_ELA | 46 | MD08-22-22-13-10   | 33.3 | 15.5 | 5.1  |
| 2014 | NUS | 2014_MI_ELA | 47 | MD09W272-8-4-13-3  | 44.6 | 26.2 | 5.2  |
| 2014 | NUS | 2014_MI_ELA | 48 | MDC07026-12-28     | 50.8 | 15.2 | 3.3  |
| 2014 | NUS | 2014_MI_ELA | 49 | MO120194           | 57.6 | 19.3 | 2.8  |
| 2014 | NUS | 2014_MI_ELA | 50 | MO120452           | 25.4 | 22.8 | 3.5  |
| 2014 | NUS | 2014_MI_ELA | 51 | MO120794           | 40.1 | 21.2 | 4.3  |
| 2014 | NUS | 2014_MI_ELA | 52 | MO121183           | 40.9 | 25.3 | 4.5  |
| 2014 | NUS | 2014_MI_ELA | 53 | NE06545            | 59.4 | 33.1 | 8.0  |
| 2014 | NUS | 2014_MI_ELA | 54 | NE08499            | 61.8 | 26.9 | 16.6 |
| 2014 | NUS | 2014_MI_ELA | 55 | NE10478            | 47.8 | 21.0 | 5.8  |
| 2014 | NUS | 2014_MI_ELA | 56 | NI12702W           | 53.0 | 21.2 | 11.7 |
| 2014 | NUS | 2014_MI_ELA | 57 | VA10W-140          | 67.1 | 30.8 | 8.7  |
| 2014 | NUS | 2014_MI_ELA | 58 | VA11W-106          | 54.6 | 17.4 | 7.6  |
| 2014 | NUS | 2014_MI_ELA | 59 | VA11W-301          | 56.5 | 37.5 | 8.2  |
| 2014 | NUS | 2014_MI_ELA | 60 | VA12FHB-53         | 45.2 | 21.2 | 5.8  |
| 2014 | NUS | 2014_IN_HIG | 1  | TRUMAN             | 35.0 | 96.1 | NA   |

|      |     |             |    |                    |      |       |    |
|------|-----|-------------|----|--------------------|------|-------|----|
| 2014 | NUS | 2014_IN_HIG | 2  | ERNIE              | 55.0 | 76.2  | NA |
| 2014 | NUS | 2014_IN_HIG | 3  | FREEDOM            | 60.0 | 91.3  | NA |
| 2014 | NUS | 2014_IN_HIG | 4  | PIONEER2545        | 70.0 | 77.0  | NA |
| 2014 | NUS | 2014_IN_HIG | 5  | NY01016-AN         | 40.0 | 100.0 | NA |
| 2014 | NUS | 2014_IN_HIG | 6  | NY01066-278        | 65.0 | 79.7  | NA |
| 2014 | NUS | 2014_IN_HIG | 7  | NY99059-249        | 75.0 | 90.3  | NA |
| 2014 | NUS | 2014_IN_HIG | 8  | NY99069-249        | 55.0 | 82.7  | NA |
| 2014 | NUS | 2014_IN_HIG | 9  | NY99069-352        | 70.0 | 100.0 | NA |
| 2014 | NUS | 2014_IN_HIG | 10 | KWS023             | 85.0 | 91.2  | NA |
| 2014 | NUS | 2014_IN_HIG | 11 | KWS024             | 80.0 | 100.0 | NA |
| 2014 | NUS | 2014_IN_HIG | 12 | KWS025             | 45.0 | 100.0 | NA |
| 2014 | NUS | 2014_IN_HIG | 13 | KWS028             | 75.0 | 60.3  | NA |
| 2014 | NUS | 2014_IN_HIG | 14 | L29230             | 80.0 | 92.9  | NA |
| 2014 | NUS | 2014_IN_HIG | 15 | LCS321             | 80.0 | 74.3  | NA |
| 2014 | NUS | 2014_IN_HIG | 16 | E6012              | 80.0 | 100.0 | NA |
| 2014 | NUS | 2014_IN_HIG | 17 | F0036R             | 60.0 | 88.7  | NA |
| 2014 | NUS | 2014_IN_HIG | 18 | F0039              | 75.0 | 100.0 | NA |
| 2014 | NUS | 2014_IN_HIG | 19 | F1014              | 70.0 | 100.0 | NA |
| 2014 | NUS | 2014_IN_HIG | 20 | OH07-263-3         | 55.0 | 100.0 | NA |
| 2014 | NUS | 2014_IN_HIG | 21 | OH08-206-69        | 70.0 | 94.7  | NA |
| 2014 | NUS | 2014_IN_HIG | 22 | OH08-269-58        | 90.0 | 94.4  | NA |
| 2014 | NUS | 2014_IN_HIG | 23 | 0570A1-2-32-5-1-4  | 90.0 | 100.0 | NA |
| 2014 | NUS | 2014_IN_HIG | 24 | 0762A1-2-8         | 60.0 | 100.0 | NA |
| 2014 | NUS | 2014_IN_HIG | 25 | 08334A1-31         | 75.0 | 99.3  | NA |
| 2014 | NUS | 2014_IN_HIG | 26 | 10641B1-9-11-7     | 80.0 | 94.4  | NA |
| 2014 | NUS | 2014_IN_HIG | 27 | B08-91993          | 75.0 | 100.0 | NA |
| 2014 | NUS | 2014_IN_HIG | 28 | B09-900256         | 80.0 | 100.0 | NA |
| 2014 | NUS | 2014_IN_HIG | 29 | M09L-9547          | 75.0 | 100.0 | NA |
| 2014 | NUS | 2014_IN_HIG | 30 | M10-1100           | 75.0 | 87.1  | NA |
| 2014 | NUS | 2014_IN_HIG | 31 | M11-1027           | 80.0 | 90.8  | NA |
| 2014 | NUS | 2014_IN_HIG | 32 | M11-2298           | 35.0 | 80.4  | NA |
| 2014 | NUS | 2014_IN_HIG | 33 | GL133              | 70.0 | 96.1  | NA |
| 2014 | NUS | 2014_IN_HIG | 34 | GL164              | 50.0 | 54.5  | NA |
| 2014 | NUS | 2014_IN_HIG | 35 | UGRCC2-78          | 60.0 | 100.0 | NA |
| 2014 | NUS | 2014_IN_HIG | 36 | UGRCC5-116         | 55.0 | 76.4  | NA |
| 2014 | NUS | 2014_IN_HIG | 37 | IL09-24328         | 40.0 | 82.1  | NA |
| 2014 | NUS | 2014_IN_HIG | 38 | IL09-3264          | 50.0 | 62.1  | NA |
| 2014 | NUS | 2014_IN_HIG | 39 | IL10-19464         | 80.0 | 61.9  | NA |
| 2014 | NUS | 2014_IN_HIG | 40 | IL10-6855          | 75.0 | 40.8  | NA |
| 2014 | NUS | 2014_IN_HIG | 41 | KY05C-1020-4-6-5   | 65.0 | 84.3  | NA |
| 2014 | NUS | 2014_IN_HIG | 42 | KY05C-1105-43-6-1  | 75.0 | 75.1  | NA |
| 2014 | NUS | 2014_IN_HIG | 43 | KY06C-3003-43-13-3 | 35.0 | 100.0 | NA |
| 2014 | NUS | 2014_IN_HIG | 44 | KY204604           | 75.0 | 90.5  | NA |
| 2014 | NUS | 2014_IN_HIG | 45 | MD08-22-22-13-4    | 20.0 | 53.1  | NA |
| 2014 | NUS | 2014_IN_HIG | 46 | MD08-22-22-13-10   | 30.0 | 72.7  | NA |
| 2014 | NUS | 2014_IN_HIG | 47 | MD09W272-8-4-13-3  | 75.0 | 88.3  | NA |
| 2014 | NUS | 2014_IN_HIG | 48 | MDC07026-12-28     | 70.0 | 49.1  | NA |
| 2014 | NUS | 2014_IN_HIG | 49 | MO120194           | 65.0 | 66.6  | NA |
| 2014 | NUS | 2014_IN_HIG | 50 | MO120452           | 70.0 | 62.4  | NA |

|      |     |             |    |                   |      |       |    |
|------|-----|-------------|----|-------------------|------|-------|----|
| 2014 | NUS | 2014_IN_HIG | 51 | MO120794          | 55.0 | 100.0 | NA |
| 2014 | NUS | 2014_IN_HIG | 52 | MO121183          | 75.0 | 94.8  | NA |
| 2014 | NUS | 2014_IN_HIG | 53 | NE06545           | 80.0 | 89.3  | NA |
| 2014 | NUS | 2014_IN_HIG | 54 | NE08499           | 85.0 | 84.2  | NA |
| 2014 | NUS | 2014_IN_HIG | 55 | NE10478           | 75.0 | 100.0 | NA |
| 2014 | NUS | 2014_IN_HIG | 56 | NI12702W          | 85.0 | 75.0  | NA |
| 2014 | NUS | 2014_IN_HIG | 57 | VA10W-140         | 70.0 | 97.1  | NA |
| 2014 | NUS | 2014_IN_HIG | 58 | VA11W-106         | 80.0 | 95.1  | NA |
| 2014 | NUS | 2014_IN_HIG | 59 | VA11W-301         | 80.0 | 100.0 | NA |
| 2014 | NUS | 2014_IN_HIG | 60 | VA12FHB-53        | 60.0 | 90.4  | NA |
| 2014 | NUS | 2014_NY_ITH | 1  | TRUMAN            | 12.4 | NA    | NA |
| 2014 | NUS | 2014_NY_ITH | 2  | ERNIE             | 12.2 | NA    | NA |
| 2014 | NUS | 2014_NY_ITH | 3  | FREEDOM           | 16.0 | NA    | NA |
| 2014 | NUS | 2014_NY_ITH | 4  | PIONEER2545       | 14.8 | NA    | NA |
| 2014 | NUS | 2014_NY_ITH | 5  | NY01016-AN        | 8.6  | NA    | NA |
| 2014 | NUS | 2014_NY_ITH | 6  | NY01066-278       | 28.0 | NA    | NA |
| 2014 | NUS | 2014_NY_ITH | 7  | NY99059-249       | 12.6 | NA    | NA |
| 2014 | NUS | 2014_NY_ITH | 8  | NY99069-249       | 14.2 | NA    | NA |
| 2014 | NUS | 2014_NY_ITH | 9  | NY99069-352       | 15.6 | NA    | NA |
| 2014 | NUS | 2014_NY_ITH | 10 | KWS023            | 16.6 | NA    | NA |
| 2014 | NUS | 2014_NY_ITH | 11 | KWS024            | 15.0 | NA    | NA |
| 2014 | NUS | 2014_NY_ITH | 12 | KWS025            | 30.4 | NA    | NA |
| 2014 | NUS | 2014_NY_ITH | 13 | KWS028            | 10.4 | NA    | NA |
| 2014 | NUS | 2014_NY_ITH | 14 | L29230            | 24.0 | NA    | NA |
| 2014 | NUS | 2014_NY_ITH | 15 | LCS321            | 8.6  | NA    | NA |
| 2014 | NUS | 2014_NY_ITH | 16 | E6012             | 11.4 | NA    | NA |
| 2014 | NUS | 2014_NY_ITH | 17 | F0036R            | 14.8 | NA    | NA |
| 2014 | NUS | 2014_NY_ITH | 18 | F0039             | 55.5 | NA    | NA |
| 2014 | NUS | 2014_NY_ITH | 19 | F1014             | 16.8 | NA    | NA |
| 2014 | NUS | 2014_NY_ITH | 20 | OH07-263-3        | 15.8 | NA    | NA |
| 2014 | NUS | 2014_NY_ITH | 21 | OH08-206-69       | 16.4 | NA    | NA |
| 2014 | NUS | 2014_NY_ITH | 22 | OH08-269-58       | 11.2 | NA    | NA |
| 2014 | NUS | 2014_NY_ITH | 23 | 0570A1-2-32-5-1-4 | 15.6 | NA    | NA |
| 2014 | NUS | 2014_NY_ITH | 24 | 0762A1-2-8        | 9.8  | NA    | NA |
| 2014 | NUS | 2014_NY_ITH | 25 | 08334A1-31        | 14.4 | NA    | NA |
| 2014 | NUS | 2014_NY_ITH | 26 | 10641B1-9-11-7    | 8.6  | NA    | NA |
| 2014 | NUS | 2014_NY_ITH | 27 | B08-91993         | 13.2 | NA    | NA |
| 2014 | NUS | 2014_NY_ITH | 28 | B09-900256        | 17.2 | NA    | NA |
| 2014 | NUS | 2014_NY_ITH | 29 | M09L-9547         | 7.2  | NA    | NA |
| 2014 | NUS | 2014_NY_ITH | 30 | M10-1100          | 17.4 | NA    | NA |
| 2014 | NUS | 2014_NY_ITH | 31 | M11-1027          | 11.8 | NA    | NA |
| 2014 | NUS | 2014_NY_ITH | 32 | M11-2298          | 13.6 | NA    | NA |
| 2014 | NUS | 2014_NY_ITH | 33 | GL133             | 18.4 | NA    | NA |
| 2014 | NUS | 2014_NY_ITH | 34 | GL164             | 16.0 | NA    | NA |
| 2014 | NUS | 2014_NY_ITH | 35 | UGRCC2-78         | 20.2 | NA    | NA |
| 2014 | NUS | 2014_NY_ITH | 36 | UGRCC5-116        | 12.8 | NA    | NA |
| 2014 | NUS | 2014_NY_ITH | 37 | IL09-24328        | 12.0 | NA    | NA |
| 2014 | NUS | 2014_NY_ITH | 38 | IL09-3264         | 16.0 | NA    | NA |
| 2014 | NUS | 2014_NY_ITH | 39 | IL10-19464        | 9.2  | NA    | NA |



|      |     |             |    |                    |      |      |      |
|------|-----|-------------|----|--------------------|------|------|------|
| 2014 | NUS | 2014_NY_ITH | 40 | IL10-6855          | 7.6  | NA   | NA   |
| 2014 | NUS | 2014_NY_ITH | 41 | KY05C-1020-4-6-5   | 9.2  | NA   | NA   |
| 2014 | NUS | 2014_NY_ITH | 42 | KY05C-1105-43-6-1  | 10.2 | NA   | NA   |
| 2014 | NUS | 2014_NY_ITH | 43 | KY06C-3003-43-13-3 | 7.0  | NA   | NA   |
| 2014 | NUS | 2014_NY_ITH | 44 | KY204604           | 25.2 | NA   | NA   |
| 2014 | NUS | 2014_NY_ITH | 45 | MD08-22-22-13-4    | 8.6  | NA   | NA   |
| 2014 | NUS | 2014_NY_ITH | 46 | MD08-22-22-13-10   | 9.0  | NA   | NA   |
| 2014 | NUS | 2014_NY_ITH | 47 | MD09W272-8-4-13-3  | 9.6  | NA   | NA   |
| 2014 | NUS | 2014_NY_ITH | 48 | MDC07026-12-28     | 6.8  | NA   | NA   |
| 2014 | NUS | 2014_NY_ITH | 49 | MO120194           | 10.2 | NA   | NA   |
| 2014 | NUS | 2014_NY_ITH | 50 | MO120452           | 11.4 | NA   | NA   |
| 2014 | NUS | 2014_NY_ITH | 51 | MO120794           | 8.0  | NA   | NA   |
| 2014 | NUS | 2014_NY_ITH | 52 | MO121183           | 15.0 | NA   | NA   |
| 2014 | NUS | 2014_NY_ITH | 53 | NE06545            | 13.8 | NA   | NA   |
| 2014 | NUS | 2014_NY_ITH | 54 | NE08499            | 10.0 | NA   | NA   |
| 2014 | NUS | 2014_NY_ITH | 55 | NE10478            | 16.4 | NA   | NA   |
| 2014 | NUS | 2014_NY_ITH | 56 | NI12702W           | 27.6 | NA   | NA   |
| 2014 | NUS | 2014_NY_ITH | 57 | VA10W-140          | 15.4 | NA   | NA   |
| 2014 | NUS | 2014_NY_ITH | 58 | VA11W-106          | 14.2 | NA   | NA   |
| 2014 | NUS | 2014_NY_ITH | 59 | VA11W-301          | 23.0 | NA   | NA   |
| 2014 | NUS | 2014_NY_ITH | 60 | VA12FHB-53         | 9.6  | NA   | NA   |
| 2014 | NUS | 2014_KY_LEX | 1  | TRUMAN             | 38.2 | 11.5 | 16.1 |
| 2014 | NUS | 2014_KY_LEX | 2  | ERNIE              | 29.0 | 27.6 | 14.7 |
| 2014 | NUS | 2014_KY_LEX | 3  | FREEDOM            | 45.9 | 33.2 | 16.5 |
| 2014 | NUS | 2014_KY_LEX | 4  | PIONEER2545        | 57.8 | 45.9 | 16.9 |
| 2014 | NUS | 2014_KY_LEX | 5  | NY01016-AN         | 41.2 | 21.9 | 15.7 |
| 2014 | NUS | 2014_KY_LEX | 6  | NY01066-278        | 61.0 | 41.2 | 14.9 |
| 2014 | NUS | 2014_KY_LEX | 7  | NY99059-249        | 40.0 | 20.3 | 13.8 |
| 2014 | NUS | 2014_KY_LEX | 8  | NY99069-249        | 43.2 | 31.7 | 12.7 |
| 2014 | NUS | 2014_KY_LEX | 9  | NY99069-352        | 50.1 | 38.8 | 22.7 |
| 2014 | NUS | 2014_KY_LEX | 10 | KWS023             | 47.8 | 27.4 | 11.6 |
| 2014 | NUS | 2014_KY_LEX | 11 | KWS024             | 26.3 | 27.2 | 12.5 |
| 2014 | NUS | 2014_KY_LEX | 12 | KWS025             | 46.7 | 32.4 | 14.2 |
| 2014 | NUS | 2014_KY_LEX | 13 | KWS028             | 46.7 | 29.1 | 13.9 |
| 2014 | NUS | 2014_KY_LEX | 14 | L29230             | 51.6 | 36.7 | 12.8 |
| 2014 | NUS | 2014_KY_LEX | 15 | LCS321             | 41.7 | 27.9 | 21.8 |
| 2014 | NUS | 2014_KY_LEX | 16 | E6012              | 51.2 | 28.3 | 16.3 |
| 2014 | NUS | 2014_KY_LEX | 17 | F0036R             | 39.9 | 34.6 | 13.1 |
| 2014 | NUS | 2014_KY_LEX | 18 | F0039              | 65.5 | 43.4 | 19.8 |
| 2014 | NUS | 2014_KY_LEX | 19 | F1014              | 53.9 | 28.2 | 17.9 |
| 2014 | NUS | 2014_KY_LEX | 20 | OH07-263-3         | 34.5 | 22.6 | 15.1 |
| 2014 | NUS | 2014_KY_LEX | 21 | OH08-206-69        | 35.1 | 30.5 | 11.6 |
| 2014 | NUS | 2014_KY_LEX | 22 | OH08-269-58        | 49.1 | 33.2 | 16.1 |
| 2014 | NUS | 2014_KY_LEX | 23 | 0570A1-2-32-5-1-4  | 34.0 | 21.1 | 21.6 |
| 2014 | NUS | 2014_KY_LEX | 24 | 0762A1-2-8         | 18.2 | 22.3 | 7.7  |
| 2014 | NUS | 2014_KY_LEX | 25 | 08334A1-31         | 26.2 | 26.0 | 12.2 |
| 2014 | NUS | 2014_KY_LEX | 26 | 10641B1-9-11-7     | 22.4 | 18.2 | 13.4 |
| 2014 | NUS | 2014_KY_LEX | 27 | B08-91993          | 37.8 | 21.8 | 11.3 |
| 2014 | NUS | 2014_KY_LEX | 28 | B09-900256         | 23.1 | 33.7 | 17.3 |

|      |     |             |    |                    |      |       |      |
|------|-----|-------------|----|--------------------|------|-------|------|
| 2014 | NUS | 2014_KY_LEX | 29 | M09L-9547          | 31.1 | 26.3  | 15.7 |
| 2014 | NUS | 2014_KY_LEX | 30 | M10-1100           | 37.8 | 28.9  | 10.8 |
| 2014 | NUS | 2014_KY_LEX | 31 | M11-1027           | 28.9 | 27.7  | 11.9 |
| 2014 | NUS | 2014_KY_LEX | 32 | M11-2298           | 21.7 | 23.8  | 12.4 |
| 2014 | NUS | 2014_KY_LEX | 33 | GL133              | 40.8 | 36.6  | 15.9 |
| 2014 | NUS | 2014_KY_LEX | 34 | GL164              | 29.2 | 29.2  | 13.4 |
| 2014 | NUS | 2014_KY_LEX | 35 | UGRCC2-78          | 44.9 | 40.5  | 15.5 |
| 2014 | NUS | 2014_KY_LEX | 36 | UGRCC5-116         | 39.8 | 29.1  | 9.5  |
| 2014 | NUS | 2014_KY_LEX | 37 | IL09-24328         | 22.9 | 14.5  | 7.5  |
| 2014 | NUS | 2014_KY_LEX | 38 | IL09-3264          | 14.3 | 14.6  | 6.2  |
| 2014 | NUS | 2014_KY_LEX | 39 | IL10-19464         | 26.1 | 15.7  | 8.1  |
| 2014 | NUS | 2014_KY_LEX | 40 | IL10-6855          | 17.2 | 8.6   | 6.3  |
| 2014 | NUS | 2014_KY_LEX | 41 | KY05C-1020-4-6-5   | 25.6 | 22.7  | 15.4 |
| 2014 | NUS | 2014_KY_LEX | 42 | KY05C-1105-43-6-1  | 30.1 | 27.7  | 12.2 |
| 2014 | NUS | 2014_KY_LEX | 43 | KY06C-3003-43-13-3 | 28.9 | 19.9  | 12.1 |
| 2014 | NUS | 2014_KY_LEX | 44 | KY204604           | 48.3 | 34.3  | 17.2 |
| 2014 | NUS | 2014_KY_LEX | 45 | MD08-22-22-13-4    | 19.6 | 9.8   | 6.7  |
| 2014 | NUS | 2014_KY_LEX | 46 | MD08-22-22-13-10   | 20.7 | 13.0  | 6.8  |
| 2014 | NUS | 2014_KY_LEX | 47 | MD09W272-8-4-13-3  | 39.4 | 22.9  | 9.6  |
| 2014 | NUS | 2014_KY_LEX | 48 | MDC07026-12-28     | 20.1 | 23.8  | 6.3  |
| 2014 | NUS | 2014_KY_LEX | 49 | MO120194           | 32.8 | 23.3  | 13.8 |
| 2014 | NUS | 2014_KY_LEX | 50 | MO120452           | 37.6 | 14.0  | 11.0 |
| 2014 | NUS | 2014_KY_LEX | 51 | MO120794           | 35.0 | 27.4  | 13.4 |
| 2014 | NUS | 2014_KY_LEX | 52 | MO121183           | 33.8 | 27.8  | 7.3  |
| 2014 | NUS | 2014_KY_LEX | 53 | NE06545            | 46.9 | 36.4  | 11.0 |
| 2014 | NUS | 2014_KY_LEX | 54 | NE08499            | 34.7 | 29.2  | 13.6 |
| 2014 | NUS | 2014_KY_LEX | 55 | NE10478            | 39.4 | 44.4  | 11.6 |
| 2014 | NUS | 2014_KY_LEX | 56 | NI12702W           | 40.9 | 32.7  | 19.3 |
| 2014 | NUS | 2014_KY_LEX | 57 | VA10W-140          | 48.8 | 22.8  | 9.3  |
| 2014 | NUS | 2014_KY_LEX | 58 | VA11W-106          | 44.0 | 26.3  | 13.1 |
| 2014 | NUS | 2014_KY_LEX | 59 | VA11W-301          | 31.5 | 31.0  | 12.1 |
| 2014 | NUS | 2014_KY_LEX | 60 | VA12FHB-53         | 32.6 | 28.4  | 10.1 |
| 2014 | NUS | 2014_NE_MEA | 1  | TRUMAN             | 0.0  | 17.0  | NA   |
| 2014 | NUS | 2014_NE_MEA | 2  | ERNIE              | 14.0 | 17.0  | NA   |
| 2014 | NUS | 2014_NE_MEA | 3  | FREEDOM            | NA   | NA    | NA   |
| 2014 | NUS | 2014_NE_MEA | 4  | PIONEER2545        | 16.3 | 90.0  | NA   |
| 2014 | NUS | 2014_NE_MEA | 5  | NY01016-AN         | 0.0  | 100.0 | NA   |
| 2014 | NUS | 2014_NE_MEA | 6  | NY01066-278        | 7.0  | NA    | NA   |
| 2014 | NUS | 2014_NE_MEA | 7  | NY99059-249        | 0.0  | 8.0   | NA   |
| 2014 | NUS | 2014_NE_MEA | 8  | NY99069-249        | 8.0  | 68.0  | NA   |
| 2014 | NUS | 2014_NE_MEA | 9  | NY99069-352        | 0.0  | NA    | NA   |
| 2014 | NUS | 2014_NE_MEA | 10 | KWS023             | 11.1 | 28.0  | NA   |
| 2014 | NUS | 2014_NE_MEA | 11 | KWS024             | NA   | 21.0  | NA   |
| 2014 | NUS | 2014_NE_MEA | 12 | KWS025             | 12.5 | 11.0  | NA   |
| 2014 | NUS | 2014_NE_MEA | 13 | KWS028             | 6.7  | 69.0  | NA   |
| 2014 | NUS | 2014_NE_MEA | 14 | L29230             | 10.8 | 30.0  | NA   |
| 2014 | NUS | 2014_NE_MEA | 15 | LCS321             | 3.1  | 32.0  | NA   |
| 2014 | NUS | 2014_NE_MEA | 16 | E6012              | 8.7  | 36.0  | NA   |
| 2014 | NUS | 2014_NE_MEA | 17 | F0036R             | 5.0  | 28.0  | NA   |

|      |     |             |    |                    |      |      |    |
|------|-----|-------------|----|--------------------|------|------|----|
| 2014 | NUS | 2014_NE_MEA | 18 | F0039              | NA   | NA   | NA |
| 2014 | NUS | 2014_NE_MEA | 19 | F1014              | NA   | NA   | NA |
| 2014 | NUS | 2014_NE_MEA | 20 | OH07-263-3         | 20.3 | 41.0 | NA |
| 2014 | NUS | 2014_NE_MEA | 21 | OH08-206-69        | 11.1 | 92.0 | NA |
| 2014 | NUS | 2014_NE_MEA | 22 | OH08-269-58        | 23.1 | 40.0 | NA |
| 2014 | NUS | 2014_NE_MEA | 23 | 0570A1-2-32-5-1-4  | NA   | NA   | NA |
| 2014 | NUS | 2014_NE_MEA | 24 | 0762A1-2-8         | 7.5  | NA   | NA |
| 2014 | NUS | 2014_NE_MEA | 25 | 08334A1-31         | 12.0 | NA   | NA |
| 2014 | NUS | 2014_NE_MEA | 26 | 10641B1-9-11-7     | NA   | NA   | NA |
| 2014 | NUS | 2014_NE_MEA | 27 | B08-91993          | 10.0 | 23.0 | NA |
| 2014 | NUS | 2014_NE_MEA | 28 | B09-900256         | 15.0 | 20.0 | NA |
| 2014 | NUS | 2014_NE_MEA | 29 | M09L-9547          | 9.1  | 8.0  | NA |
| 2014 | NUS | 2014_NE_MEA | 30 | M10-1100           | 11.7 | 44.0 | NA |
| 2014 | NUS | 2014_NE_MEA | 31 | M11-1027           | 9.7  | 5.0  | NA |
| 2014 | NUS | 2014_NE_MEA | 32 | M11-2298           | 6.3  | 3.0  | NA |
| 2014 | NUS | 2014_NE_MEA | 33 | GL133              | 33.3 | 4.0  | NA |
| 2014 | NUS | 2014_NE_MEA | 34 | GL164              | 0.0  | 2.0  | NA |
| 2014 | NUS | 2014_NE_MEA | 35 | UGRCC2-78          | 12.5 | 4.0  | NA |
| 2014 | NUS | 2014_NE_MEA | 36 | UGRCC5-116         | 13.4 | 3.0  | NA |
| 2014 | NUS | 2014_NE_MEA | 37 | IL09-24328         | 17.1 | 5.0  | NA |
| 2014 | NUS | 2014_NE_MEA | 38 | IL09-3264          | 21.8 | 3.0  | NA |
| 2014 | NUS | 2014_NE_MEA | 39 | IL10-19464         | 15.9 | 3.0  | NA |
| 2014 | NUS | 2014_NE_MEA | 40 | IL10-6855          | 20.9 | 6.0  | NA |
| 2014 | NUS | 2014_NE_MEA | 41 | KY05C-1020-4-6-5   | 6.3  | 6.0  | NA |
| 2014 | NUS | 2014_NE_MEA | 42 | KY05C-1105-43-6-1  | 15.0 | 20.0 | NA |
| 2014 | NUS | 2014_NE_MEA | 43 | KY06C-3003-43-13-3 | 3.3  | 16.0 | NA |
| 2014 | NUS | 2014_NE_MEA | 44 | KY204604           | 9.7  | 11.0 | NA |
| 2014 | NUS | 2014_NE_MEA | 45 | MD08-22-22-13-4    | 17.6 | 0.0  | NA |
| 2014 | NUS | 2014_NE_MEA | 46 | MD08-22-22-13-10   | 0.0  | 4.0  | NA |
| 2014 | NUS | 2014_NE_MEA | 47 | MD09W272-8-4-13-3  | 8.0  | NA   | NA |
| 2014 | NUS | 2014_NE_MEA | 48 | MDC07026-12-28     | 30.3 | 5.0  | NA |
| 2014 | NUS | 2014_NE_MEA | 49 | MO120194           | 18.8 | 49.0 | NA |
| 2014 | NUS | 2014_NE_MEA | 50 | MO120452           | 23.8 | 7.0  | NA |
| 2014 | NUS | 2014_NE_MEA | 51 | MO120794           | 2.5  | 6.0  | NA |
| 2014 | NUS | 2014_NE_MEA | 52 | MO121183           | 24.7 | 14.0 | NA |
| 2014 | NUS | 2014_NE_MEA | 53 | NE06545            | 20.0 | 14.0 | NA |
| 2014 | NUS | 2014_NE_MEA | 54 | NE08499            | 13.1 | 6.0  | NA |
| 2014 | NUS | 2014_NE_MEA | 55 | NE10478            | 7.9  | 55.0 | NA |
| 2014 | NUS | 2014_NE_MEA | 56 | NI12702W           | 14.5 | 5.0  | NA |
| 2014 | NUS | 2014_NE_MEA | 57 | VA10W-140          | 2.5  | NA   | NA |
| 2014 | NUS | 2014_NE_MEA | 58 | VA11W-106          | 5.8  | NA   | NA |
| 2014 | NUS | 2014_NE_MEA | 59 | VA11W-301          | 15.0 | 6.0  | NA |
| 2014 | NUS | 2014_NE_MEA | 60 | VA12FHB-53         | 5.0  | 20.0 | NA |
| 2014 | NUS | 2014_ON_RID | 1  | TRUMAN             | 6.7  | NA   | NA |
| 2014 | NUS | 2014_ON_RID | 2  | ERNIE              | 30.0 | NA   | NA |
| 2014 | NUS | 2014_ON_RID | 3  | FREEDOM            | 31.7 | NA   | NA |
| 2014 | NUS | 2014_ON_RID | 4  | PIONEER2545        | 55.0 | NA   | NA |
| 2014 | NUS | 2014_ON_RID | 5  | NY01016-AN         | 23.3 | NA   | NA |
| 2014 | NUS | 2014_ON_RID | 6  | NY01066-278        | 48.3 | NA   | NA |

|      |     |             |    |                    |      |    |    |
|------|-----|-------------|----|--------------------|------|----|----|
| 2014 | NUS | 2014_ON_RID | 7  | NY99059-249        | 28.3 | NA | NA |
| 2014 | NUS | 2014_ON_RID | 8  | NY99069-249        | 30.0 | NA | NA |
| 2014 | NUS | 2014_ON_RID | 9  | NY99069-352        | 25.0 | NA | NA |
| 2014 | NUS | 2014_ON_RID | 10 | KWS023             | 23.3 | NA | NA |
| 2014 | NUS | 2014_ON_RID | 11 | KWS024             | 46.7 | NA | NA |
| 2014 | NUS | 2014_ON_RID | 12 | KWS025             | 20.0 | NA | NA |
| 2014 | NUS | 2014_ON_RID | 13 | KWS028             | 20.0 | NA | NA |
| 2014 | NUS | 2014_ON_RID | 14 | L29230             | 46.7 | NA | NA |
| 2014 | NUS | 2014_ON_RID | 15 | LCS321             | 21.7 | NA | NA |
| 2014 | NUS | 2014_ON_RID | 16 | E6012              | 36.7 | NA | NA |
| 2014 | NUS | 2014_ON_RID | 17 | F0036R             | 33.3 | NA | NA |
| 2014 | NUS | 2014_ON_RID | 18 | F0039              | 66.7 | NA | NA |
| 2014 | NUS | 2014_ON_RID | 19 | F1014              | 30.0 | NA | NA |
| 2014 | NUS | 2014_ON_RID | 20 | OH07-263-3         | 35.0 | NA | NA |
| 2014 | NUS | 2014_ON_RID | 21 | OH08-206-69        | 33.3 | NA | NA |
| 2014 | NUS | 2014_ON_RID | 22 | OH08-269-58        | 60.0 | NA | NA |
| 2014 | NUS | 2014_ON_RID | 23 | 0570A1-2-32-5-1-4  | 10.0 | NA | NA |
| 2014 | NUS | 2014_ON_RID | 24 | 0762A1-2-8         | 23.3 | NA | NA |
| 2014 | NUS | 2014_ON_RID | 25 | 08334A1-31         | 33.3 | NA | NA |
| 2014 | NUS | 2014_ON_RID | 26 | 10641B1-9-11-7     | 25.0 | NA | NA |
| 2014 | NUS | 2014_ON_RID | 27 | B08-91993          | 38.3 | NA | NA |
| 2014 | NUS | 2014_ON_RID | 28 | B09-900256         | 48.3 | NA | NA |
| 2014 | NUS | 2014_ON_RID | 29 | M09L-9547          | 20.0 | NA | NA |
| 2014 | NUS | 2014_ON_RID | 30 | M10-1100           | 20.0 | NA | NA |
| 2014 | NUS | 2014_ON_RID | 31 | M11-1027           | 10.0 | NA | NA |
| 2014 | NUS | 2014_ON_RID | 32 | M11-2298           | 38.3 | NA | NA |
| 2014 | NUS | 2014_ON_RID | 33 | GL133              | 73.3 | NA | NA |
| 2014 | NUS | 2014_ON_RID | 34 | GL164              | 43.3 | NA | NA |
| 2014 | NUS | 2014_ON_RID | 35 | UGRCC2-78          | 20.0 | NA | NA |
| 2014 | NUS | 2014_ON_RID | 36 | UGRCC5-116         | 17.5 | NA | NA |
| 2014 | NUS | 2014_ON_RID | 37 | IL09-24328         | 18.3 | NA | NA |
| 2014 | NUS | 2014_ON_RID | 38 | IL09-3264          | 20.0 | NA | NA |
| 2014 | NUS | 2014_ON_RID | 39 | IL10-19464         | 18.3 | NA | NA |
| 2014 | NUS | 2014_ON_RID | 40 | IL10-6855          | 36.7 | NA | NA |
| 2014 | NUS | 2014_ON_RID | 41 | KY05C-1020-4-6-5   | 25.0 | NA | NA |
| 2014 | NUS | 2014_ON_RID | 42 | KY05C-1105-43-6-1  | 28.3 | NA | NA |
| 2014 | NUS | 2014_ON_RID | 43 | KY06C-3003-43-13-3 | 25.0 | NA | NA |
| 2014 | NUS | 2014_ON_RID | 44 | KY204604           | 35.0 | NA | NA |
| 2014 | NUS | 2014_ON_RID | 45 | MD08-22-22-13-4    | 20.0 | NA | NA |
| 2014 | NUS | 2014_ON_RID | 46 | MD08-22-22-13-10   | 13.3 | NA | NA |
| 2014 | NUS | 2014_ON_RID | 47 | MD09W272-8-4-13-3  | 16.7 | NA | NA |
| 2014 | NUS | 2014_ON_RID | 48 | MDC07026-12-28     | 20.0 | NA | NA |
| 2014 | NUS | 2014_ON_RID | 49 | MO120194           | 16.7 | NA | NA |
| 2014 | NUS | 2014_ON_RID | 50 | MO120452           | 28.3 | NA | NA |
| 2014 | NUS | 2014_ON_RID | 51 | MO120794           | 33.3 | NA | NA |
| 2014 | NUS | 2014_ON_RID | 52 | MO121183           | 30.0 | NA | NA |
| 2014 | NUS | 2014_ON_RID | 53 | NE06545            | 15.0 | NA | NA |
| 2014 | NUS | 2014_ON_RID | 54 | NE08499            | 26.7 | NA | NA |
| 2014 | NUS | 2014_ON_RID | 55 | NE10478            | 30.0 | NA | NA |

|      |     |             |    |                    |      |      |      |
|------|-----|-------------|----|--------------------|------|------|------|
| 2014 | NUS | 2014_ON_RID | 56 | NI12702W           | 23.3 | NA   | NA   |
| 2014 | NUS | 2014_ON_RID | 57 | VA10W-140          | 23.3 | NA   | NA   |
| 2014 | NUS | 2014_ON_RID | 58 | VA11W-106          | 18.3 | NA   | NA   |
| 2014 | NUS | 2014_ON_RID | 59 | VA11W-301          | 48.3 | NA   | NA   |
| 2014 | NUS | 2014_ON_RID | 60 | VA12FHB-53         | 31.7 | NA   | NA   |
| 2014 | NUS | 2014_IL_URB | 1  | TRUMAN             | 21.2 | 22.5 | 14.8 |
| 2014 | NUS | 2014_IL_URB | 2  | ERNIE              | 42.8 | 40.0 | 13.8 |
| 2014 | NUS | 2014_IL_URB | 3  | FREEDOM            | 68.6 | 55.0 | 22.3 |
| 2014 | NUS | 2014_IL_URB | 4  | PIONEER2545        | 78.3 | 57.5 | 44.1 |
| 2014 | NUS | 2014_IL_URB | 5  | NY01016-AN         | 75.5 | 50.0 | 35.2 |
| 2014 | NUS | 2014_IL_URB | 6  | NY01066-278        | 84.8 | 72.5 | 36.3 |
| 2014 | NUS | 2014_IL_URB | 7  | NY99059-249        | 70.6 | 30.0 | 15.7 |
| 2014 | NUS | 2014_IL_URB | 8  | NY99069-249        | 63.6 | 50.0 | 22.7 |
| 2014 | NUS | 2014_IL_URB | 9  | NY99069-352        | 44.9 | 27.5 | 20.6 |
| 2014 | NUS | 2014_IL_URB | 10 | KWS023             | 72.0 | 57.5 | 14.3 |
| 2014 | NUS | 2014_IL_URB | 11 | KWS024             | 43.8 | 42.5 | 12.0 |
| 2014 | NUS | 2014_IL_URB | 12 | KWS025             | 78.0 | 40.0 | 10.3 |
| 2014 | NUS | 2014_IL_URB | 13 | KWS028             | 62.9 | 20.0 | 8.6  |
| 2014 | NUS | 2014_IL_URB | 14 | L29230             | 48.3 | 37.5 | 11.5 |
| 2014 | NUS | 2014_IL_URB | 15 | LCS321             | 41.9 | 37.5 | 17.8 |
| 2014 | NUS | 2014_IL_URB | 16 | E6012              | 58.6 | 30.0 | 14.8 |
| 2014 | NUS | 2014_IL_URB | 17 | F0036R             | 66.0 | 52.5 | 32.0 |
| 2014 | NUS | 2014_IL_URB | 18 | F0039              | 83.7 | 60.0 | 46.5 |
| 2014 | NUS | 2014_IL_URB | 19 | F1014              | 20.5 | 50.0 | 40.6 |
| 2014 | NUS | 2014_IL_URB | 20 | OH07-263-3         | 35.9 | 17.5 | 7.1  |
| 2014 | NUS | 2014_IL_URB | 21 | OH08-206-69        | 50.7 | 65.0 | 12.8 |
| 2014 | NUS | 2014_IL_URB | 22 | OH08-269-58        | 55.2 | 25.0 | 7.9  |
| 2014 | NUS | 2014_IL_URB | 23 | 0570A1-2-32-5-1-4  | 32.6 | 64.3 | 30.4 |
| 2014 | NUS | 2014_IL_URB | 24 | 0762A1-2-8         | 12.8 | 30.0 | 7.5  |
| 2014 | NUS | 2014_IL_URB | 25 | 08334A1-31         | 37.0 | 45.0 | 7.4  |
| 2014 | NUS | 2014_IL_URB | 26 | 10641B1-9-11-7     | 19.5 | 72.5 | 20.7 |
| 2014 | NUS | 2014_IL_URB | 27 | B08-91993          | 40.6 | 25.0 | 9.0  |
| 2014 | NUS | 2014_IL_URB | 28 | B09-900256         | 68.9 | 67.5 | 18.5 |
| 2014 | NUS | 2014_IL_URB | 29 | M09L-9547          | 34.7 | 37.5 | 10.0 |
| 2014 | NUS | 2014_IL_URB | 30 | M10-1100           | 53.6 | 27.5 | 15.1 |
| 2014 | NUS | 2014_IL_URB | 31 | M11-1027           | 24.3 | 30.0 | 12.0 |
| 2014 | NUS | 2014_IL_URB | 32 | M11-2298           | 35.8 | 15.0 | 8.7  |
| 2014 | NUS | 2014_IL_URB | 33 | GL133              | 46.2 | 42.5 | 10.5 |
| 2014 | NUS | 2014_IL_URB | 34 | GL164              | 43.7 | 27.5 | 6.2  |
| 2014 | NUS | 2014_IL_URB | 35 | UGRCC2-78          | 67.1 | 27.5 | 9.0  |
| 2014 | NUS | 2014_IL_URB | 36 | UGRCC5-116         | 50.9 | 22.5 | 6.9  |
| 2014 | NUS | 2014_IL_URB | 37 | IL09-24328         | 27.7 | 12.5 | 4.0  |
| 2014 | NUS | 2014_IL_URB | 38 | IL09-3264          | 32.0 | 17.5 | 5.1  |
| 2014 | NUS | 2014_IL_URB | 39 | IL10-19464         | 18.6 | 15.0 | 6.5  |
| 2014 | NUS | 2014_IL_URB | 40 | IL10-6855          | 17.0 | 15.0 | 5.9  |
| 2014 | NUS | 2014_IL_URB | 41 | KY05C-1020-4-6-5   | 16.2 | 40.0 | 13.6 |
| 2014 | NUS | 2014_IL_URB | 42 | KY05C-1105-43-6-1  | 17.0 | 17.5 | 8.0  |
| 2014 | NUS | 2014_IL_URB | 43 | KY06C-3003-43-13-3 | 42.5 | 15.0 | 7.4  |
| 2014 | NUS | 2014_IL_URB | 44 | KY204604           | 76.5 | 57.5 | 33.8 |

|      |     |             |    |                   |      |      |      |
|------|-----|-------------|----|-------------------|------|------|------|
| 2014 | NUS | 2014_IL_URB | 45 | MD08-22-22-13-4   | 10.3 | 12.5 | 3.4  |
| 2014 | NUS | 2014_IL_URB | 46 | MD08-22-22-13-10  | 10.3 | 37.5 | 7.4  |
| 2014 | NUS | 2014_IL_URB | 47 | MD09W272-8-4-13-3 | 16.5 | 67.5 | 18.6 |
| 2014 | NUS | 2014_IL_URB | 48 | MDC07026-12-28    | 18.2 | 62.5 | 10.1 |
| 2014 | NUS | 2014_IL_URB | 49 | MO120194          | 20.5 | 12.5 | 4.4  |
| 2014 | NUS | 2014_IL_URB | 50 | MO120452          | 18.6 | 25.0 | 11.4 |
| 2014 | NUS | 2014_IL_URB | 51 | MO120794          | 40.2 | 17.5 | 14.2 |
| 2014 | NUS | 2014_IL_URB | 52 | MO121183          | 52.6 | 32.5 | 14.4 |
| 2014 | NUS | 2014_IL_URB | 53 | NE06545           | 51.7 | 37.5 | 12.0 |
| 2014 | NUS | 2014_IL_URB | 54 | NE08499           | 49.9 | 35.0 | 10.7 |
| 2014 | NUS | 2014_IL_URB | 55 | NE10478           | 35.5 | 57.5 | 18.5 |
| 2014 | NUS | 2014_IL_URB | 56 | NI12702W          | 71.7 | 32.5 | 15.6 |
| 2014 | NUS | 2014_IL_URB | 57 | VA10W-140         | 62.8 | 45.0 | 11.4 |
| 2014 | NUS | 2014_IL_URB | 58 | VA11W-106         | 45.8 | 40.0 | 18.7 |
| 2014 | NUS | 2014_IL_URB | 59 | VA11W-301         | 69.9 | 60.0 | 24.0 |
| 2014 | NUS | 2014_IL_URB | 60 | VA12FHB-53        | 36.3 | 50.6 | 18.0 |
| 2014 | NUS | 2014_IN_WLA | 1  | TRUMAN            | NA   | 7.5  | 0.7  |
| 2014 | NUS | 2014_IN_WLA | 2  | ERNIE             | NA   | 15.5 | 2.8  |
| 2014 | NUS | 2014_IN_WLA | 3  | FREEDOM           | NA   | 12.5 | 1.4  |
| 2014 | NUS | 2014_IN_WLA | 4  | PIONEER2545       | NA   | 3.0  | 0.4  |
| 2014 | NUS | 2014_IN_WLA | 5  | NY01016-AN        | NA   | 10.5 | 1.5  |
| 2014 | NUS | 2014_IN_WLA | 6  | NY01066-278       | NA   | 10.0 | 1.3  |
| 2014 | NUS | 2014_IN_WLA | 7  | NY99059-249       | NA   | 20.0 | 0.9  |
| 2014 | NUS | 2014_IN_WLA | 8  | NY99069-249       | NA   | 15.5 | 1.6  |
| 2014 | NUS | 2014_IN_WLA | 9  | NY99069-352       | NA   | 12.5 | 1.7  |
| 2014 | NUS | 2014_IN_WLA | 10 | KWS023            | NA   | 5.0  | 1.5  |
| 2014 | NUS | 2014_IN_WLA | 11 | KWS024            | NA   | 10.5 | 2.4  |
| 2014 | NUS | 2014_IN_WLA | 12 | KWS025            | NA   | 20.5 | 1.4  |
| 2014 | NUS | 2014_IN_WLA | 13 | KWS028            | NA   | 20.5 | 1.7  |
| 2014 | NUS | 2014_IN_WLA | 14 | L29230            | NA   | 12.5 | 2.1  |
| 2014 | NUS | 2014_IN_WLA | 15 | LCS321            | NA   | 10.5 | 1.1  |
| 2014 | NUS | 2014_IN_WLA | 16 | E6012             | NA   | 3.0  | 0.4  |
| 2014 | NUS | 2014_IN_WLA | 17 | F0036R            | NA   | 7.5  | 1.1  |
| 2014 | NUS | 2014_IN_WLA | 18 | F0039             | NA   | 17.5 | 2.1  |
| 2014 | NUS | 2014_IN_WLA | 19 | F1014             | NA   | 10.5 | 0.8  |
| 2014 | NUS | 2014_IN_WLA | 20 | OH07-263-3        | NA   | 7.5  | 1.5  |
| 2014 | NUS | 2014_IN_WLA | 21 | OH08-206-69       | NA   | 1.0  | 1.8  |
| 2014 | NUS | 2014_IN_WLA | 22 | OH08-269-58       | NA   | 15.0 | 4.2  |
| 2014 | NUS | 2014_IN_WLA | 23 | 0570A1-2-32-5-1-4 | NA   | 20.0 | 3.7  |
| 2014 | NUS | 2014_IN_WLA | 24 | 0762A1-2-8        | NA   | 7.5  | 1.4  |
| 2014 | NUS | 2014_IN_WLA | 25 | 08334A1-31        | NA   | 20.0 | 2.8  |
| 2014 | NUS | 2014_IN_WLA | 26 | 10641B1-9-11-7    | NA   | 12.5 | 1.5  |
| 2014 | NUS | 2014_IN_WLA | 27 | B08-91993         | NA   | 20.0 | 2.1  |
| 2014 | NUS | 2014_IN_WLA | 28 | B09-900256        | NA   | 5.5  | 1.0  |
| 2014 | NUS | 2014_IN_WLA | 29 | M09L-9547         | NA   | 5.0  | 1.0  |
| 2014 | NUS | 2014_IN_WLA | 30 | M10-1100          | NA   | 15.5 | 2.1  |
| 2014 | NUS | 2014_IN_WLA | 31 | M11-1027          | NA   | 1.0  | 0.6  |
| 2014 | NUS | 2014_IN_WLA | 32 | M11-2298          | NA   | 15.5 | 2.2  |
| 2014 | NUS | 2014_IN_WLA | 33 | GL133             | NA   | 3.0  | 1.2  |

|      |     |             |    |                    |      |      |      |
|------|-----|-------------|----|--------------------|------|------|------|
| 2014 | NUS | 2014_IN_WLA | 34 | GL164              | NA   | 20.5 | 1.8  |
| 2014 | NUS | 2014_IN_WLA | 35 | UGRCC2-78          | NA   | 20.5 | 3.1  |
| 2014 | NUS | 2014_IN_WLA | 36 | UGRCC5-116         | NA   | 10.5 | 1.6  |
| 2014 | NUS | 2014_IN_WLA | 37 | IL09-24328         | NA   | 40.0 | 3.6  |
| 2014 | NUS | 2014_IN_WLA | 38 | IL09-3264          | NA   | 15.5 | 3.0  |
| 2014 | NUS | 2014_IN_WLA | 39 | IL10-19464         | NA   | 5.5  | 0.6  |
| 2014 | NUS | 2014_IN_WLA | 40 | IL10-6855          | NA   | 20.0 | 2.0  |
| 2014 | NUS | 2014_IN_WLA | 41 | KY05C-1020-4-6-5   | NA   | 5.5  | 1.3  |
| 2014 | NUS | 2014_IN_WLA | 42 | KY05C-1105-43-6-1  | NA   | 10.5 | 2.6  |
| 2014 | NUS | 2014_IN_WLA | 43 | KY06C-3003-43-13-3 | NA   | 15.5 | 3.2  |
| 2014 | NUS | 2014_IN_WLA | 44 | KY204604           | NA   | 10.5 | 2.1  |
| 2014 | NUS | 2014_IN_WLA | 45 | MD08-22-22-13-4    | NA   | 10.0 | 1.3  |
| 2014 | NUS | 2014_IN_WLA | 46 | MD08-22-22-13-10   | NA   | 3.0  | 1.5  |
| 2014 | NUS | 2014_IN_WLA | 47 | MD09W272-8-4-13-3  | NA   | 10.5 | 1.7  |
| 2014 | NUS | 2014_IN_WLA | 48 | MDC07026-12-28     | NA   | 17.5 | 0.8  |
| 2014 | NUS | 2014_IN_WLA | 49 | MO120194           | NA   | 3.0  | 0.8  |
| 2014 | NUS | 2014_IN_WLA | 50 | MO120452           | NA   | 15.5 | 1.8  |
| 2014 | NUS | 2014_IN_WLA | 51 | MO120794           | NA   | 5.0  | 1.7  |
| 2014 | NUS | 2014_IN_WLA | 52 | MO121183           | NA   | 17.5 | 2.1  |
| 2014 | NUS | 2014_IN_WLA | 53 | NE06545            | NA   | 17.5 | 1.9  |
| 2014 | NUS | 2014_IN_WLA | 54 | NE08499            | NA   | 17.5 | 1.9  |
| 2014 | NUS | 2014_IN_WLA | 55 | NE10478            | NA   | 10.5 | 3.3  |
| 2014 | NUS | 2014_IN_WLA | 56 | NI12702W           | NA   | 12.5 | 1.9  |
| 2014 | NUS | 2014_IN_WLA | 57 | VA10W-140          | NA   | 25.5 | 3.3  |
| 2014 | NUS | 2014_IN_WLA | 58 | VA11W-106          | NA   | 20.0 | 2.3  |
| 2014 | NUS | 2014_IN_WLA | 59 | VA11W-301          | NA   | 10.5 | 0.8  |
| 2014 | NUS | 2014_IN_WLA | 60 | VA12FHB-53         | NA   | 10.0 | 0.7  |
| 2014 | NUS | 2014_OH_WO  |    |                    |      |      |      |
| 2014 | NUS | O           | 1  | TRUMAN             | 33.7 | 40.0 | 18.8 |
| 2014 | NUS | 2014_OH_WO  |    |                    |      |      |      |
| 2014 | NUS | O           | 2  | ERNIE              | 31.0 | 20.0 | 16.5 |
| 2014 | NUS | 2014_OH_WO  |    |                    |      |      |      |
| 2014 | NUS | O           | 3  | FREEDOM            | 42.0 | 80.0 | 19.8 |
| 2014 | NUS | 2014_OH_WO  |    |                    |      |      |      |
| 2014 | NUS | O           | 4  | PIONEER2545        | 74.8 | 85.0 | 24.2 |
| 2014 | NUS | 2014_OH_WO  |    |                    |      |      |      |
| 2014 | NUS | O           | 5  | NY01016-AN         | 54.9 | 40.0 | 21.6 |
| 2014 | NUS | 2014_OH_WO  |    |                    |      |      |      |
| 2014 | NUS | O           | 6  | NY01066-278        | 74.8 | 50.0 | 21.0 |
| 2014 | NUS | 2014_OH_WO  |    |                    |      |      |      |
| 2014 | NUS | O           | 7  | NY99059-249        | 59.7 | 50.0 | 19.4 |
| 2014 | NUS | 2014_OH_WO  |    |                    |      |      |      |
| 2014 | NUS | O           | 8  | NY99069-249        | 62.3 | 45.0 | 24.5 |
| 2014 | NUS | 2014_OH_WO  |    |                    |      |      |      |
| 2014 | NUS | O           | 9  | NY99069-352        | 71.3 | 65.0 | 31.3 |
| 2014 | NUS | 2014_OH_WO  |    |                    |      |      |      |
| 2014 | NUS | O           | 10 | KWS023             | 51.0 | 50.0 | 14.8 |
| 2014 | NUS | 2014_OH_WO  |    |                    |      |      |      |
| 2014 | NUS | O           | 11 | KWS024             | 37.8 | 60.0 | 24.3 |
| 2014 | NUS | 2014_OH_WO  |    |                    |      |      |      |
| 2014 | NUS | O           | 12 | KWS025             | 65.2 | 40.0 | 16.7 |

|      |     |                 |    |                   |      |      |      |
|------|-----|-----------------|----|-------------------|------|------|------|
| 2014 | NUS | 2014_OH_WO<br>O | 13 | KWS028            | 61.6 | 65.0 | 24.4 |
| 2014 | NUS | 2014_OH_WO<br>O | 14 | L29230            | 55.5 | 55.0 | 19.1 |
| 2014 | NUS | 2014_OH_WO<br>O | 15 | LCS321            | 53.8 | 50.0 | 26.0 |
| 2014 | NUS | 2014_OH_WO<br>O | 16 | E6012             | 65.3 | 40.0 | 20.9 |
| 2014 | NUS | 2014_OH_WO<br>O | 17 | F0036R            | 74.4 | 75.0 | 17.4 |
| 2014 | NUS | 2014_OH_WO<br>O | 18 | F0039             | 76.5 | 95.0 | 26.0 |
| 2014 | NUS | 2014_OH_WO<br>O | 19 | F1014             | 55.7 | 75.0 | 29.9 |
| 2014 | NUS | 2014_OH_WO<br>O | 20 | OH07-263-3        | 30.0 | 30.0 | 16.3 |
| 2014 | NUS | 2014_OH_WO<br>O | 21 | OH08-206-69       | 34.0 | 40.0 | 15.5 |
| 2014 | NUS | 2014_OH_WO<br>O | 22 | OH08-269-58       | 58.7 | 50.0 | 13.9 |
| 2014 | NUS | 2014_OH_WO<br>O | 23 | 0570A1-2-32-5-1-4 | 20.1 | 40.0 | 20.6 |
| 2014 | NUS | 2014_OH_WO<br>O | 24 | 0762A1-2-8        | 17.2 | 25.0 | 13.7 |
| 2014 | NUS | 2014_OH_WO<br>O | 25 | 08334A1-31        | 24.0 | 25.0 | 14.0 |
| 2014 | NUS | 2014_OH_WO<br>O | 26 | 10641B1-9-11-7    | 14.4 | 75.0 | 41.1 |
| 2014 | NUS | 2014_OH_WO<br>O | 27 | B08-91993         | 47.7 | 60.0 | 17.3 |
| 2014 | NUS | 2014_OH_WO<br>O | 28 | B09-900256        | 69.8 | 70.0 | 14.6 |
| 2014 | NUS | 2014_OH_WO<br>O | 29 | M09L-9547         | 42.8 | 80.0 | 26.9 |
| 2014 | NUS | 2014_OH_WO<br>O | 30 | M10-1100          | 54.0 | 70.0 | 16.8 |
| 2014 | NUS | 2014_OH_WO<br>O | 31 | M11-1027          | 54.0 | 70.0 | 23.3 |
| 2014 | NUS | 2014_OH_WO<br>O | 32 | M11-2298          | 35.9 | 70.0 | 32.1 |
| 2014 | NUS | 2014_OH_WO<br>O | 33 | GL133             | 63.3 | 80.0 | 25.8 |
| 2014 | NUS | 2014_OH_WO<br>O | 34 | GL164             | 37.1 | 70.0 | 27.5 |
| 2014 | NUS | 2014_OH_WO<br>O | 35 | UGRCC2-78         | 80.8 | 80.0 | 36.1 |
| 2014 | NUS | 2014_OH_WO<br>O | 36 | UGRCC5-116        | 57.9 | 50.0 | 21.7 |
| 2014 | NUS | 2014_OH_WO<br>O | 37 | IL09-24328        | 16.8 | 20.0 | 13.4 |
| 2014 | NUS | 2014_OH_WO<br>O | 38 | IL09-3264         | 15.8 | 25.0 | 12.3 |
| 2014 | NUS | 2014_OH_WO<br>O | 39 | IL10-19464        | 17.3 | 15.0 | 12.6 |
| 2014 | NUS | 2014_OH_WO<br>O | 40 | IL10-6855         | 25.2 | 25.0 | 18.0 |



|      |     |                 |    |                    |      |      |      |
|------|-----|-----------------|----|--------------------|------|------|------|
| 2014 | NUS | 2014_OH_WO<br>O | 41 | KY05C-1020-4-6-5   | 44.8 | 70.0 | 41.1 |
| 2014 | NUS | 2014_OH_WO<br>O | 42 | KY05C-1105-43-6-1  | 21.2 | 50.0 | 18.2 |
| 2014 | NUS | 2014_OH_WO<br>O | 43 | KY06C-3003-43-13-3 | 40.9 | 40.0 | 23.3 |
| 2014 | NUS | 2014_OH_WO<br>O | 44 | KY204604           | 73.4 | 60.0 | 35.0 |
| 2014 | NUS | 2014_OH_WO<br>O | 45 | MD08-22-22-13-4    | 17.8 | 20.0 | 16.1 |
| 2014 | NUS | 2014_OH_WO<br>O | 46 | MD08-22-22-13-10   | 14.5 | 25.0 | 17.4 |
| 2014 | NUS | 2014_OH_WO<br>O | 47 | MD09W272-8-4-13-3  | 27.0 | 40.0 | 19.5 |
| 2014 | NUS | 2014_OH_WO<br>O | 48 | MDC07026-12-28     | 33.3 | 40.0 | 21.6 |
| 2014 | NUS | 2014_OH_WO<br>O | 49 | MO120194           | 12.5 | 25.0 | 14.0 |
| 2014 | NUS | 2014_OH_WO<br>O | 50 | MO120452           | 29.8 | 20.0 | 18.8 |
| 2014 | NUS | 2014_OH_WO<br>O | 51 | MO120794           | 34.6 | 30.0 | 28.8 |
| 2014 | NUS | 2014_OH_WO<br>O | 52 | MO121183           | 47.1 | 35.0 | 15.9 |
| 2014 | NUS | 2014_OH_WO<br>O | 53 | NE06545            | 43.5 | 80.0 | 26.1 |
| 2014 | NUS | 2014_OH_WO<br>O | 54 | NE08499            | 40.4 | 80.0 | 29.1 |
| 2014 | NUS | 2014_OH_WO<br>O | 55 | NE10478            | 44.0 | 85.0 | 22.8 |
| 2014 | NUS | 2014_OH_WO<br>O | 56 | NI12702W           | 62.5 | 85.0 | 34.7 |
| 2014 | NUS | 2014_OH_WO<br>O | 57 | VA10W-140          | 62.3 | 50.0 | 20.1 |
| 2014 | NUS | 2014_OH_WO<br>O | 58 | VA11W-106          | 48.8 | 60.0 | 29.5 |
| 2014 | NUS | 2014_OH_WO<br>O | 59 | VA11W-301          | 75.2 | 85.0 | 37.4 |
| 2014 | NUS | 2014_OH_WO<br>O | 60 | VA12FHB-53         | 45.8 | 75.0 | 34.9 |
| 2015 | NUS | 2015_VA_BLA     | 1  | TRUMAN             | 9.1  | NA   | NA   |
| 2015 | NUS | 2015_VA_BLA     | 2  | ERNIE              | 26.1 | NA   | NA   |
| 2015 | NUS | 2015_VA_BLA     | 3  | FREEDOM            | 9.8  | NA   | NA   |
| 2015 | NUS | 2015_VA_BLA     | 4  | PIONEER2545        | 41.7 | NA   | NA   |
| 2015 | NUS | 2015_VA_BLA     | 5  | NY99056-161        | 30.5 | NA   | NA   |
| 2015 | NUS | 2015_VA_BLA     | 6  | NY09067-2-69-1097  | 21.3 | NA   | NA   |
| 2015 | NUS | 2015_VA_BLA     | 7  | NY05152-818        | 24.9 | NA   | NA   |
| 2015 | NUS | 2015_VA_BLA     | 8  | NY05152-825        | 8.5  | NA   | NA   |
| 2015 | NUS | 2015_VA_BLA     | 9  | NY05152-821        | 46.9 | NA   | NA   |
| 2015 | NUS | 2015_VA_BLA     | 10 | KWS050             | 18.5 | NA   | NA   |
| 2015 | NUS | 2015_VA_BLA     | 11 | KWS051             | 14.0 | NA   | NA   |
| 2015 | NUS | 2015_VA_BLA     | 12 | KWS052             | 14.1 | NA   | NA   |
| 2015 | NUS | 2015_VA_BLA     | 13 | KWS036             | 22.4 | NA   | NA   |
| 2015 | NUS | 2015_VA_BLA     | 14 | ES12-3030          | 10.5 | NA   | NA   |

|      |     |             |    |                    |      |    |    |
|------|-----|-------------|----|--------------------|------|----|----|
| 2015 | NUS | 2015_VA_BLA | 15 | ES12-1358          | 9.0  | NA | NA |
| 2015 | NUS | 2015_VA_BLA | 16 | ES12-1275          | 11.8 | NA | NA |
| 2015 | NUS | 2015_VA_BLA | 17 | F1014              | 14.8 | NA | NA |
| 2015 | NUS | 2015_VA_BLA | 18 | E6012              | 23.5 | NA | NA |
| 2015 | NUS | 2015_VA_BLA | 19 | OH09-207-24        | 42.0 | NA | NA |
| 2015 | NUS | 2015_VA_BLA | 20 | OH09-281-10        | 11.4 | NA | NA |
| 2015 | NUS | 2015_VA_BLA | 21 | OH10-200-49        | 22.5 | NA | NA |
| 2015 | NUS | 2015_VA_BLA | 22 | 10641B1-9-11-7     | 16.8 | NA | NA |
| 2015 | NUS | 2015_VA_BLA | 23 | 0762A1-2-8         | 7.0  | NA | NA |
| 2015 | NUS | 2015_VA_BLA | 24 | 08334A1-31         | 15.9 | NA | NA |
| 2015 | NUS | 2015_VA_BLA | 25 | 0566A1-3-1-6       | 22.3 | NA | NA |
| 2015 | NUS | 2015_VA_BLA | 26 | 10512RA1-8         | 9.6  | NA | NA |
| 2015 | NUS | 2015_VA_BLA | 27 | M11-2024           | 13.5 | NA | NA |
| 2015 | NUS | 2015_VA_BLA | 28 | M12-3312CW         | 20.9 | NA | NA |
| 2015 | NUS | 2015_VA_BLA | 29 | M12-3301           | 15.0 | NA | NA |
| 2015 | NUS | 2015_VA_BLA | 30 | M12-2036           | 9.3  | NA | NA |
| 2015 | NUS | 2015_VA_BLA | 31 | M12-2031           | 20.3 | NA | NA |
| 2015 | NUS | 2015_VA_BLA | 32 | CA9-72             | 8.2  | NA | NA |
| 2015 | NUS | 2015_VA_BLA | 33 | CA9-76             | 26.4 | NA | NA |
| 2015 | NUS | 2015_VA_BLA | 34 | DH5-15             | 24.0 | NA | NA |
| 2015 | NUS | 2015_VA_BLA | 35 | CA13-53            | 15.5 | NA | NA |
| 2015 | NUS | 2015_VA_BLA | 36 | CA13-63            | 15.0 | NA | NA |
| 2015 | NUS | 2015_VA_BLA | 37 | IL10-19464         | 14.7 | NA | NA |
| 2015 | NUS | 2015_VA_BLA | 38 | IL10-21934         | 9.9  | NA | NA |
| 2015 | NUS | 2015_VA_BLA | 39 | IL10-21937         | 7.0  | NA | NA |
| 2015 | NUS | 2015_VA_BLA | 40 | IL11-36131         | 16.4 | NA | NA |
| 2015 | NUS | 2015_VA_BLA | 41 | IL11-27667         | 13.5 | NA | NA |
| 2015 | NUS | 2015_VA_BLA | 42 | KY06C-1195-37-2-5  | 24.4 | NA | NA |
| 2015 | NUS | 2015_VA_BLA | 43 | KY06C-1201-18-6-3  | 29.9 | NA | NA |
| 2015 | NUS | 2015_VA_BLA | 44 | KY06C-1107-7-2-5   | 25.8 | NA | NA |
| 2015 | NUS | 2015_VA_BLA | 45 | KY06C-2020-10-5-3  | 18.6 | NA | NA |
| 2015 | NUS | 2015_VA_BLA | 46 | KY06C-2020-11-12-1 | 23.0 | NA | NA |
| 2015 | NUS | 2015_VA_BLA | 47 | MO122246           | 7.0  | NA | NA |
| 2015 | NUS | 2015_VA_BLA | 48 | MO130203           | 12.0 | NA | NA |
| 2015 | NUS | 2015_VA_BLA | 49 | MO130765           | 8.8  | NA | NA |
| 2015 | NUS | 2015_VA_BLA | 50 | MO131838           | 8.8  | NA | NA |
| 2015 | NUS | 2015_VA_BLA | 51 | NE05548            | 19.8 | NA | NA |
| 2015 | NUS | 2015_VA_BLA | 52 | NE10589            | 48.4 | NA | NA |
| 2015 | NUS | 2015_VA_BLA | 53 | NW13455            | 24.8 | NA | NA |
| 2015 | NUS | 2015_VA_BLA | 54 | NE13511            | 20.3 | NA | NA |
| 2015 | NUS | 2015_VA_BLA | 55 | NE06545            | 16.9 | NA | NA |
| 2015 | NUS | 2015_VA_BLA | 56 | VA11W-108          | 32.9 | NA | NA |
| 2015 | NUS | 2015_VA_BLA | 57 | VA11W-182          | 36.0 | NA | NA |
| 2015 | NUS | 2015_VA_BLA | 58 | VA12W-150          | 13.9 | NA | NA |
| 2015 | NUS | 2015_VA_BLA | 59 | VA12FHB-4          | 10.5 | NA | NA |
| 2015 | NUS | 2015_VA_BLA | 60 | VA12FHB-55         | 8.0  | NA | NA |
| 2015 | NUS | 2015_IL_CHA | 1  | TRUMAN             | 15.0 | NA | NA |
| 2015 | NUS | 2015_IL_CHA | 2  | ERNIE              | 25.0 | NA | NA |
| 2015 | NUS | 2015_IL_CHA | 3  | FREEDOM            | 45.0 | NA | NA |

|      |     |             |    |                    |      |    |    |
|------|-----|-------------|----|--------------------|------|----|----|
| 2015 | NUS | 2015_IL_CHA | 4  | PIONEER2545        | 85.0 | NA | NA |
| 2015 | NUS | 2015_IL_CHA | 5  | NY99056-161        | 27.5 | NA | NA |
| 2015 | NUS | 2015_IL_CHA | 6  | NY09067-2-69-1097  | 40.0 | NA | NA |
| 2015 | NUS | 2015_IL_CHA | 7  | NY05152-818        | 20.0 | NA | NA |
| 2015 | NUS | 2015_IL_CHA | 8  | NY05152-825        | 15.0 | NA | NA |
| 2015 | NUS | 2015_IL_CHA | 9  | NY05152-821        | 15.0 | NA | NA |
| 2015 | NUS | 2015_IL_CHA | 10 | KWS050             | 45.0 | NA | NA |
| 2015 | NUS | 2015_IL_CHA | 11 | KWS051             | 70.0 | NA | NA |
| 2015 | NUS | 2015_IL_CHA | 12 | KWS052             | 50.0 | NA | NA |
| 2015 | NUS | 2015_IL_CHA | 13 | KWS036             | 65.0 | NA | NA |
| 2015 | NUS | 2015_IL_CHA | 14 | ES12-3030          | 40.0 | NA | NA |
| 2015 | NUS | 2015_IL_CHA | 15 | ES12-1358          | 35.0 | NA | NA |
| 2015 | NUS | 2015_IL_CHA | 16 | ES12-1275          | 22.5 | NA | NA |
| 2015 | NUS | 2015_IL_CHA | 17 | F1014              | 22.5 | NA | NA |
| 2015 | NUS | 2015_IL_CHA | 18 | E6012              | 30.0 | NA | NA |
| 2015 | NUS | 2015_IL_CHA | 19 | OH09-207-24        | 17.5 | NA | NA |
| 2015 | NUS | 2015_IL_CHA | 20 | OH09-281-10        | 45.0 | NA | NA |
| 2015 | NUS | 2015_IL_CHA | 21 | OH10-200-49        | 22.5 | NA | NA |
| 2015 | NUS | 2015_IL_CHA | 22 | 10641B1-9-11-7     | 15.0 | NA | NA |
| 2015 | NUS | 2015_IL_CHA | 23 | 0762A1-2-8         | 30.0 | NA | NA |
| 2015 | NUS | 2015_IL_CHA | 24 | 08334A1-31         | 20.0 | NA | NA |
| 2015 | NUS | 2015_IL_CHA | 25 | 0566A1-3-1-6       | 35.0 | NA | NA |
| 2015 | NUS | 2015_IL_CHA | 26 | 10512RA1-8         | 15.0 | NA | NA |
| 2015 | NUS | 2015_IL_CHA | 27 | M11-2024           | 75.0 | NA | NA |
| 2015 | NUS | 2015_IL_CHA | 28 | M12-3312CW         | 15.0 | NA | NA |
| 2015 | NUS | 2015_IL_CHA | 29 | M12-3301           | 20.0 | NA | NA |
| 2015 | NUS | 2015_IL_CHA | 30 | M12-2036           | NA   | NA | NA |
| 2015 | NUS | 2015_IL_CHA | 31 | M12-2031           | NA   | NA | NA |
| 2015 | NUS | 2015_IL_CHA | 32 | CA9-72             | NA   | NA | NA |
| 2015 | NUS | 2015_IL_CHA | 33 | CA9-76             | 30.0 | NA | NA |
| 2015 | NUS | 2015_IL_CHA | 34 | DH5-15             | 65.0 | NA | NA |
| 2015 | NUS | 2015_IL_CHA | 35 | CA13-53            | 27.5 | NA | NA |
| 2015 | NUS | 2015_IL_CHA | 36 | CA13-63            | 25.0 | NA | NA |
| 2015 | NUS | 2015_IL_CHA | 37 | IL10-19464         | 20.0 | NA | NA |
| 2015 | NUS | 2015_IL_CHA | 38 | IL10-21934         | 22.5 | NA | NA |
| 2015 | NUS | 2015_IL_CHA | 39 | IL10-21937         | 20.0 | NA | NA |
| 2015 | NUS | 2015_IL_CHA | 40 | IL11-36131         | 35.0 | NA | NA |
| 2015 | NUS | 2015_IL_CHA | 41 | IL11-27667         | 25.0 | NA | NA |
| 2015 | NUS | 2015_IL_CHA | 42 | KY06C-1195-37-2-5  | 20.0 | NA | NA |
| 2015 | NUS | 2015_IL_CHA | 43 | KY06C-1201-18-6-3  | 25.0 | NA | NA |
| 2015 | NUS | 2015_IL_CHA | 44 | KY06C-1107-7-2-5   | 35.0 | NA | NA |
| 2015 | NUS | 2015_IL_CHA | 45 | KY06C-2020-10-5-3  | 40.0 | NA | NA |
| 2015 | NUS | 2015_IL_CHA | 46 | KY06C-2020-11-12-1 | 15.0 | NA | NA |
| 2015 | NUS | 2015_IL_CHA | 47 | MO122246           | 20.0 | NA | NA |
| 2015 | NUS | 2015_IL_CHA | 48 | MO130203           | 20.0 | NA | NA |
| 2015 | NUS | 2015_IL_CHA | 49 | MO130765           | 35.0 | NA | NA |
| 2015 | NUS | 2015_IL_CHA | 50 | MO131838           | 17.5 | NA | NA |
| 2015 | NUS | 2015_IL_CHA | 51 | NE05548            | 60.0 | NA | NA |
| 2015 | NUS | 2015_IL_CHA | 52 | NE10589            | 65.0 | NA | NA |

|      |     |             |    |                   |       |      |      |
|------|-----|-------------|----|-------------------|-------|------|------|
| 2015 | NUS | 2015_IL_CHA | 53 | NW13455           | 35.0  | NA   | NA   |
| 2015 | NUS | 2015_IL_CHA | 54 | NE13511           | 35.0  | NA   | NA   |
| 2015 | NUS | 2015_IL_CHA | 55 | NE06545           | 30.0  | NA   | NA   |
| 2015 | NUS | 2015_IL_CHA | 56 | VA11W-108         | 17.5  | NA   | NA   |
| 2015 | NUS | 2015_IL_CHA | 57 | VA11W-182         | 27.5  | NA   | NA   |
| 2015 | NUS | 2015_IL_CHA | 58 | VA12W-150         | 15.0  | NA   | NA   |
| 2015 | NUS | 2015_IL_CHA | 59 | VA12FHB-4         | 40.0  | NA   | NA   |
| 2015 | NUS | 2015_IL_CHA | 60 | VA12FHB-55        | 20.0  | NA   | NA   |
| 2015 | NUS | 2015_MO_CO  |    |                   |       |      |      |
| 2015 | NUS | L           | 1  | TRUMAN            | 65.0  | 12.5 | 4.4  |
| 2015 | NUS | 2015_MO_CO  |    |                   |       |      |      |
| 2015 | NUS | L           | 2  | ERNIE             | 70.0  | 35.0 | 4.2  |
| 2015 | NUS | 2015_MO_CO  |    |                   |       |      |      |
| 2015 | NUS | L           | 3  | FREEDOM           | 87.5  | 50.0 | 5.0  |
| 2015 | NUS | 2015_MO_CO  |    |                   |       |      |      |
| 2015 | NUS | L           | 4  | PIONEER2545       | 95.0  | 85.0 | 11.1 |
| 2015 | NUS | 2015_MO_CO  |    |                   |       |      |      |
| 2015 | NUS | L           | 5  | NY99056-161       | 90.0  | 55.0 | 16.7 |
| 2015 | NUS | 2015_MO_CO  |    |                   |       |      |      |
| 2015 | NUS | L           | 6  | NY09067-2-69-1097 | 80.0  | 62.5 | 7.3  |
| 2015 | NUS | 2015_MO_CO  |    |                   |       |      |      |
| 2015 | NUS | L           | 7  | NY05152-818       | 100.0 | 75.0 | 9.5  |
| 2015 | NUS | 2015_MO_CO  |    |                   |       |      |      |
| 2015 | NUS | L           | 8  | NY05152-825       | 92.5  | 35.0 | 5.0  |
| 2015 | NUS | 2015_MO_CO  |    |                   |       |      |      |
| 2015 | NUS | L           | 9  | NY05152-821       | 100.0 | 87.5 | 8.5  |
| 2015 | NUS | 2015_MO_CO  |    |                   |       |      |      |
| 2015 | NUS | L           | 10 | KWS050            | 70.0  | 60.0 | 5.4  |
| 2015 | NUS | 2015_MO_CO  |    |                   |       |      |      |
| 2015 | NUS | L           | 11 | KWS051            | 70.0  | 45.0 | 4.4  |
| 2015 | NUS | 2015_MO_CO  |    |                   |       |      |      |
| 2015 | NUS | L           | 12 | KWS052            | 67.5  | 42.5 | 7.0  |
| 2015 | NUS | 2015_MO_CO  |    |                   |       |      |      |
| 2015 | NUS | L           | 13 | KWS036            | 60.0  | 50.0 | 27.6 |
| 2015 | NUS | 2015_MO_CO  |    |                   |       |      |      |
| 2015 | NUS | L           | 14 | ES12-3030         | 90.0  | 25.0 | 10.5 |
| 2015 | NUS | 2015_MO_CO  |    |                   |       |      |      |
| 2015 | NUS | L           | 15 | ES12-1358         | 85.0  | 15.0 | 2.8  |
| 2015 | NUS | 2015_MO_CO  |    |                   |       |      |      |
| 2015 | NUS | L           | 16 | ES12-1275         | 60.0  | 30.0 | 4.8  |
| 2015 | NUS | 2015_MO_CO  |    |                   |       |      |      |
| 2015 | NUS | L           | 17 | F1014             | 95.0  | 42.5 | 9.9  |
| 2015 | NUS | 2015_MO_CO  |    |                   |       |      |      |
| 2015 | NUS | L           | 18 | E6012             | 62.5  | 40.0 | 23.8 |
| 2015 | NUS | 2015_MO_CO  |    |                   |       |      |      |
| 2015 | NUS | L           | 19 | OH09-207-24       | 62.5  | 25.0 | 2.9  |
| 2015 | NUS | 2015_MO_CO  |    |                   |       |      |      |
| 2015 | NUS | L           | 20 | OH09-281-10       | 80.0  | 85.0 | 14.2 |
| 2015 | NUS | 2015_MO_CO  |    |                   |       |      |      |
| 2015 | NUS | L           | 21 | OH10-200-49       | 70.0  | 25.0 | 5.9  |
| 2015 | NUS | 2015_MO_CO  |    |                   |       |      |      |
| 2015 | NUS | L           | 22 | 10641B1-9-11-7    | 87.5  | 10.0 | 3.9  |
| 2015 | NUS | 2015_MO_CO  |    |                   |       |      |      |
| 2015 | NUS | L           | 23 | 0762A1-2-8        | 80.0  | 17.5 | 2.4  |

|      |     |                 |    |                    |       |      |      |
|------|-----|-----------------|----|--------------------|-------|------|------|
| 2015 | NUS | 2015_MO_CO<br>L | 24 | 08334A1-31         | 90.0  | 60.0 | 5.0  |
| 2015 | NUS | 2015_MO_CO<br>L | 25 | 0566A1-3-1-6       | 77.5  | 22.5 | 6.9  |
| 2015 | NUS | 2015_MO_CO<br>L | 26 | 10512RA1-8         | 90.0  | 65.0 | 6.9  |
| 2015 | NUS | 2015_MO_CO<br>L | 27 | M11-2024           | 52.5  | 40.0 | 7.4  |
| 2015 | NUS | 2015_MO_CO<br>L | 28 | M12-3312CW         | 67.5  | 40.0 | 34.9 |
| 2015 | NUS | 2015_MO_CO<br>L | 29 | M12-3301           | 72.5  | 27.5 | 4.6  |
| 2015 | NUS | 2015_MO_CO<br>L | 30 | M12-2036           | 55.0  | 70.0 | 10.3 |
| 2015 | NUS | 2015_MO_CO<br>L | 31 | M12-2031           | 72.5  | 55.0 | 16.0 |
| 2015 | NUS | 2015_MO_CO<br>L | 32 | CA9-72             | 85.0  | 35.0 | 5.8  |
| 2015 | NUS | 2015_MO_CO<br>L | 33 | CA9-76             | 70.0  | 40.0 | 6.6  |
| 2015 | NUS | 2015_MO_CO<br>L | 34 | DH5-15             | 77.5  | 32.5 | 8.9  |
| 2015 | NUS | 2015_MO_CO<br>L | 35 | CA13-53            | 100.0 | 80.0 | 14.1 |
| 2015 | NUS | 2015_MO_CO<br>L | 36 | CA13-63            | 72.5  | 55.0 | 9.5  |
| 2015 | NUS | 2015_MO_CO<br>L | 37 | IL10-19464         | 75.0  | 7.5  | 3.7  |
| 2015 | NUS | 2015_MO_CO<br>L | 38 | IL10-21934         | 65.0  | 12.5 | 5.3  |
| 2015 | NUS | 2015_MO_CO<br>L | 39 | IL10-21937         | 35.0  | 7.5  | 3.4  |
| 2015 | NUS | 2015_MO_CO<br>L | 40 | IL11-36131         | 27.5  | 7.5  | 3.0  |
| 2015 | NUS | 2015_MO_CO<br>L | 41 | IL11-27667         | 77.5  | 45.0 | 2.6  |
| 2015 | NUS | 2015_MO_CO<br>L | 42 | KY06C-1195-37-2-5  | 85.0  | 35.0 | 4.9  |
| 2015 | NUS | 2015_MO_CO<br>L | 43 | KY06C-1201-18-6-3  | 62.5  | 35.0 | 4.1  |
| 2015 | NUS | 2015_MO_CO<br>L | 44 | KY06C-1107-7-2-5   | 77.5  | 30.0 | 4.5  |
| 2015 | NUS | 2015_MO_CO<br>L | 45 | KY06C-2020-10-5-3  | 55.0  | 10.0 | 6.3  |
| 2015 | NUS | 2015_MO_CO<br>L | 46 | KY06C-2020-11-12-1 | 77.5  | 20.0 | 3.3  |
| 2015 | NUS | 2015_MO_CO<br>L | 47 | MO122246           | 87.5  | 15.0 | 5.2  |
| 2015 | NUS | 2015_MO_CO<br>L | 48 | MO130203           | 95.0  | 12.5 | 6.9  |
| 2015 | NUS | 2015_MO_CO<br>L | 49 | MO130765           | 85.0  | 40.0 | 6.9  |
| 2015 | NUS | 2015_MO_CO<br>L | 50 | MO131838           | 75.0  | 30.0 | 9.1  |
| 2015 | NUS | 2015_MO_CO<br>L | 51 | NE05548            | 100.0 | 85.0 | 6.8  |

|      |     |                 |    |                   |      |      |      |
|------|-----|-----------------|----|-------------------|------|------|------|
| 2015 | NUS | 2015_MO_CO<br>L | 52 | NE10589           | 97.5 | 80.0 | 11.9 |
| 2015 | NUS | 2015_MO_CO<br>L | 53 | NW13455           | 95.0 | 50.0 | 20.3 |
| 2015 | NUS | 2015_MO_CO<br>L | 54 | NE13511           | 97.5 | 55.0 | 7.7  |
| 2015 | NUS | 2015_MO_CO<br>L | 55 | NE06545           | 90.0 | 25.0 | 4.8  |
| 2015 | NUS | 2015_MO_CO<br>L | 56 | VA11W-108         | 87.5 | 40.0 | 9.1  |
| 2015 | NUS | 2015_MO_CO<br>L | 57 | VA11W-182         | 70.0 | 65.0 | 4.8  |
| 2015 | NUS | 2015_MO_CO<br>L | 58 | VA12W-150         | 75.0 | 40.0 | 7.1  |
| 2015 | NUS | 2015_MO_CO<br>L | 59 | VA12FHB-4         | 77.5 | 12.5 | 6.3  |
| 2015 | NUS | 2015_MO_CO<br>L | 60 | VA12FHB-55        | 87.5 | 25.0 | 2.1  |
| 2015 | NUS | 2015_MI_ELA     | 1  | TRUMAN            | 26.5 | NA   | NA   |
| 2015 | NUS | 2015_MI_ELA     | 2  | ERNIE             | 31.7 | NA   | NA   |
| 2015 | NUS | 2015_MI_ELA     | 3  | FREEDOM           | 24.4 | NA   | NA   |
| 2015 | NUS | 2015_MI_ELA     | 4  | PIONEER2545       | 42.7 | NA   | NA   |
| 2015 | NUS | 2015_MI_ELA     | 5  | NY99056-161       | 27.6 | NA   | NA   |
| 2015 | NUS | 2015_MI_ELA     | 6  | NY09067-2-69-1097 | 16.7 | NA   | NA   |
| 2015 | NUS | 2015_MI_ELA     | 7  | NY05152-818       | 20.9 | NA   | NA   |
| 2015 | NUS | 2015_MI_ELA     | 8  | NY05152-825       | 20.8 | NA   | NA   |
| 2015 | NUS | 2015_MI_ELA     | 9  | NY05152-821       | 34.5 | NA   | NA   |
| 2015 | NUS | 2015_MI_ELA     | 10 | KWS050            | 21.9 | NA   | NA   |
| 2015 | NUS | 2015_MI_ELA     | 11 | KWS051            | 19.8 | NA   | NA   |
| 2015 | NUS | 2015_MI_ELA     | 12 | KWS052            | 22.2 | NA   | NA   |
| 2015 | NUS | 2015_MI_ELA     | 13 | KWS036            | 33.2 | NA   | NA   |
| 2015 | NUS | 2015_MI_ELA     | 14 | ES12-3030         | 23.4 | NA   | NA   |
| 2015 | NUS | 2015_MI_ELA     | 15 | ES12-1358         | 20.4 | NA   | NA   |
| 2015 | NUS | 2015_MI_ELA     | 16 | ES12-1275         | 14.2 | NA   | NA   |
| 2015 | NUS | 2015_MI_ELA     | 17 | F1014             | 26.0 | NA   | NA   |
| 2015 | NUS | 2015_MI_ELA     | 18 | E6012             | 26.6 | NA   | NA   |
| 2015 | NUS | 2015_MI_ELA     | 19 | OH09-207-24       | 16.3 | NA   | NA   |
| 2015 | NUS | 2015_MI_ELA     | 20 | OH09-281-10       | 17.9 | NA   | NA   |
| 2015 | NUS | 2015_MI_ELA     | 21 | OH10-200-49       | 28.5 | NA   | NA   |
| 2015 | NUS | 2015_MI_ELA     | 22 | 10641B1-9-11-7    | 14.1 | NA   | NA   |
| 2015 | NUS | 2015_MI_ELA     | 23 | 0762A1-2-8        | 13.9 | NA   | NA   |
| 2015 | NUS | 2015_MI_ELA     | 24 | 08334A1-31        | 21.4 | NA   | NA   |
| 2015 | NUS | 2015_MI_ELA     | 25 | 0566A1-3-1-6      | 28.6 | NA   | NA   |
| 2015 | NUS | 2015_MI_ELA     | 26 | 10512RA1-8        | 19.1 | NA   | NA   |
| 2015 | NUS | 2015_MI_ELA     | 27 | M11-2024          | 16.6 | NA   | NA   |
| 2015 | NUS | 2015_MI_ELA     | 28 | M12-3312CW        | 17.5 | NA   | NA   |
| 2015 | NUS | 2015_MI_ELA     | 29 | M12-3301          | 23.6 | NA   | NA   |
| 2015 | NUS | 2015_MI_ELA     | 30 | M12-2036          | 24.5 | NA   | NA   |
| 2015 | NUS | 2015_MI_ELA     | 31 | M12-2031          | 18.4 | NA   | NA   |
| 2015 | NUS | 2015_MI_ELA     | 32 | CA9-72            | 30.5 | NA   | NA   |
| 2015 | NUS | 2015_MI_ELA     | 33 | CA9-76            | 23.5 | NA   | NA   |

|      |     |             |    |                    |      |      |    |
|------|-----|-------------|----|--------------------|------|------|----|
| 2015 | NUS | 2015_MI_ELA | 34 | DH5-15             | 31.6 | NA   | NA |
| 2015 | NUS | 2015_MI_ELA | 35 | CA13-53            | 18.1 | NA   | NA |
| 2015 | NUS | 2015_MI_ELA | 36 | CA13-63            | 25.9 | NA   | NA |
| 2015 | NUS | 2015_MI_ELA | 37 | IL10-19464         | 11.8 | NA   | NA |
| 2015 | NUS | 2015_MI_ELA | 38 | IL10-21934         | 17.7 | NA   | NA |
| 2015 | NUS | 2015_MI_ELA | 39 | IL10-21937         | 21.0 | NA   | NA |
| 2015 | NUS | 2015_MI_ELA | 40 | IL11-36131         | 23.7 | NA   | NA |
| 2015 | NUS | 2015_MI_ELA | 41 | IL11-27667         | 22.3 | NA   | NA |
| 2015 | NUS | 2015_MI_ELA | 42 | KY06C-1195-37-2-5  | 21.5 | NA   | NA |
| 2015 | NUS | 2015_MI_ELA | 43 | KY06C-1201-18-6-3  | 22.9 | NA   | NA |
| 2015 | NUS | 2015_MI_ELA | 44 | KY06C-1107-7-2-5   | 14.9 | NA   | NA |
| 2015 | NUS | 2015_MI_ELA | 45 | KY06C-2020-10-5-3  | 23.5 | NA   | NA |
| 2015 | NUS | 2015_MI_ELA | 46 | KY06C-2020-11-12-1 | 15.9 | NA   | NA |
| 2015 | NUS | 2015_MI_ELA | 47 | MO122246           | 11.7 | NA   | NA |
| 2015 | NUS | 2015_MI_ELA | 48 | MO130203           | 26.6 | NA   | NA |
| 2015 | NUS | 2015_MI_ELA | 49 | MO130765           | 26.7 | NA   | NA |
| 2015 | NUS | 2015_MI_ELA | 50 | MO131838           | 28.5 | NA   | NA |
| 2015 | NUS | 2015_MI_ELA | 51 | NE05548            | 28.4 | NA   | NA |
| 2015 | NUS | 2015_MI_ELA | 52 | NE10589            | 34.3 | NA   | NA |
| 2015 | NUS | 2015_MI_ELA | 53 | NW13455            | 32.0 | NA   | NA |
| 2015 | NUS | 2015_MI_ELA | 54 | NE13511            | 31.0 | NA   | NA |
| 2015 | NUS | 2015_MI_ELA | 55 | NE06545            | 19.4 | NA   | NA |
| 2015 | NUS | 2015_MI_ELA | 56 | VA11W-108          | 24.2 | NA   | NA |
| 2015 | NUS | 2015_MI_ELA | 57 | VA11W-182          | 23.4 | NA   | NA |
| 2015 | NUS | 2015_MI_ELA | 58 | VA12W-150          | 18.8 | NA   | NA |
| 2015 | NUS | 2015_MI_ELA | 59 | VA12FHB-4          | 15.9 | NA   | NA |
| 2015 | NUS | 2015_MI_ELA | 60 | VA12FHB-55         | 14.8 | NA   | NA |
| 2015 | NUS | 2015_IL_HIG | 1  | TRUMAN             | 10.0 | 15.0 | NA |
| 2015 | NUS | 2015_IL_HIG | 2  | ERNIE              | 65.0 | 4.0  | NA |
| 2015 | NUS | 2015_IL_HIG | 3  | FREEDOM            | 30.0 | 77.5 | NA |
| 2015 | NUS | 2015_IL_HIG | 4  | PIONEER2545        | 55.0 | 82.5 | NA |
| 2015 | NUS | 2015_IL_HIG | 5  | NY99056-161        | 45.0 | 32.5 | NA |
| 2015 | NUS | 2015_IL_HIG | 6  | NY09067-2-69-1097  | 30.0 | 67.5 | NA |
| 2015 | NUS | 2015_IL_HIG | 7  | NY05152-818        | 20.0 | 52.5 | NA |
| 2015 | NUS | 2015_IL_HIG | 8  | NY05152-825        | 20.0 | 75.0 | NA |
| 2015 | NUS | 2015_IL_HIG | 9  | NY05152-821        | 15.0 | 27.5 | NA |
| 2015 | NUS | 2015_IL_HIG | 10 | KWS050             | 30.0 | 27.5 | NA |
| 2015 | NUS | 2015_IL_HIG | 11 | KWS051             | 45.0 | 27.5 | NA |
| 2015 | NUS | 2015_IL_HIG | 12 | KWS052             | 45.0 | 62.5 | NA |
| 2015 | NUS | 2015_IL_HIG | 13 | KWS036             | 30.0 | 70.0 | NA |
| 2015 | NUS | 2015_IL_HIG | 14 | ES12-3030          | 45.0 | 25.0 | NA |
| 2015 | NUS | 2015_IL_HIG | 15 | ES12-1358          | 30.0 | 11.5 | NA |
| 2015 | NUS | 2015_IL_HIG | 16 | ES12-1275          | 40.0 | 17.5 | NA |
| 2015 | NUS | 2015_IL_HIG | 17 | F1014              | 10.0 | 32.5 | NA |
| 2015 | NUS | 2015_IL_HIG | 18 | E6012              | 30.0 | 35.0 | NA |
| 2015 | NUS | 2015_IL_HIG | 19 | OH09-207-24        | 25.0 | 10.0 | NA |
| 2015 | NUS | 2015_IL_HIG | 20 | OH09-281-10        | 20.0 | 50.0 | NA |
| 2015 | NUS | 2015_IL_HIG | 21 | OH10-200-49        | 10.0 | 6.5  | NA |
| 2015 | NUS | 2015_IL_HIG | 22 | 10641B1-9-11-7     | 35.0 | 15.0 | NA |

|      |     |             |    |                    |      |      |     |
|------|-----|-------------|----|--------------------|------|------|-----|
| 2015 | NUS | 2015_IL_HIG | 23 | 0762A1-2-8         | 10.0 | 40.0 | NA  |
| 2015 | NUS | 2015_IL_HIG | 24 | 08334A1-31         | 25.0 | 27.5 | NA  |
| 2015 | NUS | 2015_IL_HIG | 25 | 0566A1-3-1-6       | 45.0 | 25.0 | NA  |
| 2015 | NUS | 2015_IL_HIG | 26 | 10512RA1-8         | 10.0 | 50.0 | NA  |
| 2015 | NUS | 2015_IL_HIG | 27 | M11-2024           | 35.0 | 14.0 | NA  |
| 2015 | NUS | 2015_IL_HIG | 28 | M12-3312CW         | 45.0 | 6.5  | NA  |
| 2015 | NUS | 2015_IL_HIG | 29 | M12-3301           | 10.0 | 6.5  | NA  |
| 2015 | NUS | 2015_IL_HIG | 30 | M12-2036           | 25.0 | 73.5 | NA  |
| 2015 | NUS | 2015_IL_HIG | 31 | M12-2031           | 20.0 | 37.5 | NA  |
| 2015 | NUS | 2015_IL_HIG | 32 | CA9-72             | 65.0 | 88.5 | NA  |
| 2015 | NUS | 2015_IL_HIG | 33 | CA9-76             | 60.0 | 45.0 | NA  |
| 2015 | NUS | 2015_IL_HIG | 34 | DH5-15             | 35.0 | 7.5  | NA  |
| 2015 | NUS | 2015_IL_HIG | 35 | CA13-53            | 15.0 | 35.0 | NA  |
| 2015 | NUS | 2015_IL_HIG | 36 | CA13-63            | 20.0 | 25.0 | NA  |
| 2015 | NUS | 2015_IL_HIG | 37 | IL10-19464         | 30.0 | 10.0 | NA  |
| 2015 | NUS | 2015_IL_HIG | 38 | IL10-21934         | 25.0 | 15.0 | NA  |
| 2015 | NUS | 2015_IL_HIG | 39 | IL10-21937         | 50.0 | 15.0 | NA  |
| 2015 | NUS | 2015_IL_HIG | 40 | IL11-36131         | 30.0 | 15.0 | NA  |
| 2015 | NUS | 2015_IL_HIG | 41 | IL11-27667         | 35.0 | 7.5  | NA  |
| 2015 | NUS | 2015_IL_HIG | 42 | KY06C-1195-37-2-5  | 25.0 | 15.0 | NA  |
| 2015 | NUS | 2015_IL_HIG | 43 | KY06C-1201-18-6-3  | 40.0 | 50.0 | NA  |
| 2015 | NUS | 2015_IL_HIG | 44 | KY06C-1107-7-2-5   | 55.0 | 11.5 | NA  |
| 2015 | NUS | 2015_IL_HIG | 45 | KY06C-2020-10-5-3  | 30.0 | 55.0 | NA  |
| 2015 | NUS | 2015_IL_HIG | 46 | KY06C-2020-11-12-1 | 25.0 | 3.0  | NA  |
| 2015 | NUS | 2015_IL_HIG | 47 | MO122246           | 20.0 | 27.5 | NA  |
| 2015 | NUS | 2015_IL_HIG | 48 | MO130203           | 30.0 | 4.0  | NA  |
| 2015 | NUS | 2015_IL_HIG | 49 | MO130765           | 10.0 | 39.0 | NA  |
| 2015 | NUS | 2015_IL_HIG | 50 | MO131838           | 10.0 | 30.0 | NA  |
| 2015 | NUS | 2015_IL_HIG | 51 | NE05548            | 80.0 | 77.5 | NA  |
| 2015 | NUS | 2015_IL_HIG | 52 | NE10589            | 45.0 | 80.0 | NA  |
| 2015 | NUS | 2015_IL_HIG | 53 | NW13455            | 30.0 | 55.0 | NA  |
| 2015 | NUS | 2015_IL_HIG | 54 | NE13511            | 50.0 | 75.0 | NA  |
| 2015 | NUS | 2015_IL_HIG | 55 | NE06545            | 15.0 | 25.0 | NA  |
| 2015 | NUS | 2015_IL_HIG | 56 | VA11W-108          | 45.0 | 40.0 | NA  |
| 2015 | NUS | 2015_IL_HIG | 57 | VA11W-182          | 30.0 | 32.5 | NA  |
| 2015 | NUS | 2015_IL_HIG | 58 | VA12W-150          | 50.0 | 22.5 | NA  |
| 2015 | NUS | 2015_IL_HIG | 59 | VA12FHB-4          | 25.0 | 7.5  | NA  |
| 2015 | NUS | 2015_IL_HIG | 60 | VA12FHB-55         | 20.0 | 10.0 | NA  |
| 2015 | NUS | 2015_NY_ITH | 2  | ERNIE              | 10.4 | 45.0 | 2.4 |
| 2015 | NUS | 2015_NY_ITH | 3  | FREEDOM            | 21.0 | 70.0 | 4.0 |
| 2015 | NUS | 2015_NY_ITH | 4  | PIONEER2545        | 15.4 | 90.0 | 8.6 |
| 2015 | NUS | 2015_NY_ITH | 5  | NY99056-161        | 15.8 | 35.0 | 2.9 |
| 2015 | NUS | 2015_NY_ITH | 6  | NY09067-2-69-1097  | 16.8 | 70.0 | 3.1 |
| 2015 | NUS | 2015_NY_ITH | 7  | NY05152-818        | 13.0 | 45.0 | 3.0 |
| 2015 | NUS | 2015_NY_ITH | 8  | NY05152-825        | 9.6  | 30.0 | 1.2 |
| 2015 | NUS | 2015_NY_ITH | 9  | NY05152-821        | 9.6  | 60.0 | 3.2 |
| 2015 | NUS | 2015_NY_ITH | 10 | KWS050             | 19.8 | 45.0 | 3.7 |
| 2015 | NUS | 2015_NY_ITH | 11 | KWS051             | 14.8 | 55.0 | 1.2 |
| 2015 | NUS | 2015_NY_ITH | 12 | KWS052             | 16.4 | 70.0 | 1.1 |



|      |     |             |    |                    |      |      |     |
|------|-----|-------------|----|--------------------|------|------|-----|
| 2015 | NUS | 2015_NY_ITH | 13 | KWS036             | 22.4 | 55.0 | 9.2 |
| 2015 | NUS | 2015_NY_ITH | 14 | ES12-3030          | 10.0 | 55.0 | 3.5 |
| 2015 | NUS | 2015_NY_ITH | 15 | ES12-1358          | 7.8  | 25.0 | 1.4 |
| 2015 | NUS | 2015_NY_ITH | 16 | ES12-1275          | 9.0  | 65.0 | 1.0 |
| 2015 | NUS | 2015_NY_ITH | 17 | F1014              | 13.8 | 45.0 | 4.7 |
| 2015 | NUS | 2015_NY_ITH | 18 | E6012              | 13.2 | 45.0 | 4.9 |
| 2015 | NUS | 2015_NY_ITH | 19 | OH09-207-24        | 10.8 | 50.0 | 1.9 |
| 2015 | NUS | 2015_NY_ITH | 20 | OH09-281-10        | 17.8 | 70.0 | 3.7 |
| 2015 | NUS | 2015_NY_ITH | 21 | OH10-200-49        | 10.2 | 35.0 | 2.0 |
| 2015 | NUS | 2015_NY_ITH | 22 | 10641B1-9-11-7     | 11.0 | 55.0 | 1.9 |
| 2015 | NUS | 2015_NY_ITH | 23 | 0762A1-2-8         | 11.6 | 70.0 | 1.5 |
| 2015 | NUS | 2015_NY_ITH | 24 | 08334A1-31         | 13.4 | 60.0 | 2.2 |
| 2015 | NUS | 2015_NY_ITH | 25 | 0566A1-3-1-6       | 14.0 | 45.0 | 1.1 |
| 2015 | NUS | 2015_NY_ITH | 26 | 10512RA1-8         | 10.4 | 70.0 | 2.4 |
| 2015 | NUS | 2015_NY_ITH | 27 | M11-2024           | 19.8 | 55.0 | 3.7 |
| 2015 | NUS | 2015_NY_ITH | 28 | M12-3312CW         | 15.8 | 45.0 | 4.9 |
| 2015 | NUS | 2015_NY_ITH | 29 | M12-3301           | 11.6 | 45.0 | 1.4 |
| 2015 | NUS | 2015_NY_ITH | 30 | M12-2036           | 8.2  | 30.0 | 2.8 |
| 2015 | NUS | 2015_NY_ITH | 31 | M12-2031           | 11.0 | 70.0 | 3.8 |
| 2015 | NUS | 2015_NY_ITH | 32 | CA9-72             | 23.0 | 60.0 | 5.6 |
| 2015 | NUS | 2015_NY_ITH | 33 | CA9-76             | 17.6 | 85.0 | 4.7 |
| 2015 | NUS | 2015_NY_ITH | 34 | DH5-15             | 15.6 | 75.0 | 4.9 |
| 2015 | NUS | 2015_NY_ITH | 35 | CA13-53            | 17.2 | 75.0 | 5.7 |
| 2015 | NUS | 2015_NY_ITH | 36 | CA13-63            | 8.6  | 45.0 | 2.3 |
| 2015 | NUS | 2015_NY_ITH | 37 | IL10-19464         | 14.4 | 30.0 | 2.3 |
| 2015 | NUS | 2015_NY_ITH | 38 | IL10-21934         | 19.4 | 30.0 | 2.2 |
| 2015 | NUS | 2015_NY_ITH | 39 | IL10-21937         | 12.4 | 50.0 | 2.2 |
| 2015 | NUS | 2015_NY_ITH | 40 | IL11-36131         | 7.0  | 25.0 | 0.9 |
| 2015 | NUS | 2015_NY_ITH | 41 | IL11-27667         | 9.2  | 10.0 | 0.5 |
| 2015 | NUS | 2015_NY_ITH | 42 | KY06C-1195-37-2-5  | 13.0 | 25.0 | 4.2 |
| 2015 | NUS | 2015_NY_ITH | 43 | KY06C-1201-18-6-3  | 15.4 | 40.0 | 2.0 |
| 2015 | NUS | 2015_NY_ITH | 44 | KY06C-1107-7-2-5   | 11.0 | 40.0 | 3.1 |
| 2015 | NUS | 2015_NY_ITH | 45 | KY06C-2020-10-5-3  | 16.6 | 50.0 | 2.4 |
| 2015 | NUS | 2015_NY_ITH | 46 | KY06C-2020-11-12-1 | 17.8 | 25.0 | 1.8 |
| 2015 | NUS | 2015_NY_ITH | 47 | MO122246           | 16.8 | 25.0 | 1.8 |
| 2015 | NUS | 2015_NY_ITH | 48 | MO130203           | 12.8 | 40.0 | 2.6 |
| 2015 | NUS | 2015_NY_ITH | 49 | MO130765           | 12.6 | 50.0 | 2.2 |
| 2015 | NUS | 2015_NY_ITH | 50 | MO131838           | 14.6 | 45.0 | 2.1 |
| 2015 | NUS | 2015_NY_ITH | 51 | NE05548            | 27.2 | 65.0 | 3.5 |
| 2015 | NUS | 2015_NY_ITH | 52 | NE10589            | 23.6 | 60.0 | 4.5 |
| 2015 | NUS | 2015_NY_ITH | 53 | NW13455            | 10.6 | 40.0 | 2.8 |
| 2015 | NUS | 2015_NY_ITH | 54 | NE13511            | 17.4 | 55.0 | 6.5 |
| 2015 | NUS | 2015_NY_ITH | 55 | NE06545            | 17.4 | 55.0 | 4.5 |
| 2015 | NUS | 2015_NY_ITH | 56 | VA11W-108          | 11.4 | 65.0 | 2.5 |
| 2015 | NUS | 2015_NY_ITH | 57 | VA11W-182          | 16.8 | 70.0 | 1.1 |
| 2015 | NUS | 2015_NY_ITH | 58 | VA12W-150          | 17.6 | 55.0 | 3.4 |
| 2015 | NUS | 2015_NY_ITH | 59 | VA12FHB-4          | 12.2 | 55.0 | 3.5 |
| 2015 | NUS | 2015_NY_ITH | 60 | VA12FHB-55         | 7.2  | 35.0 | 1.7 |
| 2015 | NUS | 2015_KY_LEX | 1  | TRUMAN             | 39.0 | 3.7  | 3.6 |

|      |     |             |    |                    |      |      |      |
|------|-----|-------------|----|--------------------|------|------|------|
| 2015 | NUS | 2015_KY_LEX | 2  | ERNIE              | 40.3 | 9.9  | 8.6  |
| 2015 | NUS | 2015_KY_LEX | 3  | FREEDOM            | 45.1 | 9.5  | 5.1  |
| 2015 | NUS | 2015_KY_LEX | 4  | PIONEER2545        | 60.6 | 23.1 | 11.2 |
| 2015 | NUS | 2015_KY_LEX | 5  | NY99056-161        | 28.5 | 8.3  | 11.0 |
| 2015 | NUS | 2015_KY_LEX | 6  | NY09067-2-69-1097  | 41.6 | 13.7 | 11.4 |
| 2015 | NUS | 2015_KY_LEX | 7  | NY05152-818        | 32.7 | 6.4  | 6.7  |
| 2015 | NUS | 2015_KY_LEX | 8  | NY05152-825        | 39.9 | 8.7  | 4.8  |
| 2015 | NUS | 2015_KY_LEX | 9  | NY05152-821        | 32.8 | 11.2 | 9.0  |
| 2015 | NUS | 2015_KY_LEX | 10 | KWS050             | 37.2 | 14.5 | 7.2  |
| 2015 | NUS | 2015_KY_LEX | 11 | KWS051             | 29.9 | 6.8  | 3.9  |
| 2015 | NUS | 2015_KY_LEX | 12 | KWS052             | 27.8 | 14.5 | 6.3  |
| 2015 | NUS | 2015_KY_LEX | 13 | KWS036             | 44.7 | 12.7 | 17.4 |
| 2015 | NUS | 2015_KY_LEX | 14 | ES12-3030          | 48.5 | 8.2  | 5.2  |
| 2015 | NUS | 2015_KY_LEX | 15 | ES12-1358          | 30.8 | 3.3  | 1.9  |
| 2015 | NUS | 2015_KY_LEX | 16 | ES12-1275          | 17.2 | 3.6  | 5.9  |
| 2015 | NUS | 2015_KY_LEX | 17 | F1014              | 67.1 | 15.4 | 14.0 |
| 2015 | NUS | 2015_KY_LEX | 18 | E6012              | 54.6 | 7.3  | 14.8 |
| 2015 | NUS | 2015_KY_LEX | 19 | OH09-207-24        | 26.3 | 6.7  | 7.3  |
| 2015 | NUS | 2015_KY_LEX | 20 | OH09-281-10        | 33.4 | 14.7 | 10.7 |
| 2015 | NUS | 2015_KY_LEX | 21 | OH10-200-49        | 37.0 | 7.2  | 4.2  |
| 2015 | NUS | 2015_KY_LEX | 22 | 10641B1-9-11-7     | 19.2 | 6.4  | 6.1  |
| 2015 | NUS | 2015_KY_LEX | 23 | 0762A1-2-8         | 21.3 | 7.7  | 4.5  |
| 2015 | NUS | 2015_KY_LEX | 24 | 08334A1-31         | 35.0 | 8.8  | 5.1  |
| 2015 | NUS | 2015_KY_LEX | 25 | 0566A1-3-1-6       | 22.0 | 8.5  | 3.3  |
| 2015 | NUS | 2015_KY_LEX | 26 | 10512RA1-8         | 27.2 | 13.4 | 9.0  |
| 2015 | NUS | 2015_KY_LEX | 27 | M11-2024           | 26.3 | 7.3  | 8.6  |
| 2015 | NUS | 2015_KY_LEX | 28 | M12-3312CW         | 26.5 | 6.8  | 10.3 |
| 2015 | NUS | 2015_KY_LEX | 29 | M12-3301           | 37.0 | 8.2  | 5.8  |
| 2015 | NUS | 2015_KY_LEX | 30 | M12-2036           | 23.3 | 9.5  | 7.1  |
| 2015 | NUS | 2015_KY_LEX | 31 | M12-2031           | 28.7 | 13.8 | 8.0  |
| 2015 | NUS | 2015_KY_LEX | 32 | CA9-72             | 29.4 | 15.9 | 7.4  |
| 2015 | NUS | 2015_KY_LEX | 33 | CA9-76             | 45.5 | 15.0 | 10.6 |
| 2015 | NUS | 2015_KY_LEX | 34 | DH5-15             | 46.3 | 12.6 | 12.0 |
| 2015 | NUS | 2015_KY_LEX | 35 | CA13-53            | 38.5 | 14.2 | 7.4  |
| 2015 | NUS | 2015_KY_LEX | 36 | CA13-63            | 30.4 | 7.7  | 3.7  |
| 2015 | NUS | 2015_KY_LEX | 37 | IL10-19464         | 30.5 | 8.2  | 5.4  |
| 2015 | NUS | 2015_KY_LEX | 38 | IL10-21934         | 22.6 | 3.3  | 2.6  |
| 2015 | NUS | 2015_KY_LEX | 39 | IL10-21937         | 17.5 | 4.8  | 3.6  |
| 2015 | NUS | 2015_KY_LEX | 40 | IL11-36131         | 20.2 | 4.2  | 3.1  |
| 2015 | NUS | 2015_KY_LEX | 41 | IL11-27667         | 37.1 | 8.2  | 5.9  |
| 2015 | NUS | 2015_KY_LEX | 42 | KY06C-1195-37-2-5  | 38.0 | 5.5  | 8.7  |
| 2015 | NUS | 2015_KY_LEX | 43 | KY06C-1201-18-6-3  | 19.1 | 6.1  | 4.2  |
| 2015 | NUS | 2015_KY_LEX | 44 | KY06C-1107-7-2-5   | 38.5 | 7.6  | 6.6  |
| 2015 | NUS | 2015_KY_LEX | 45 | KY06C-2020-10-5-3  | 56.6 | 15.8 | 8.2  |
| 2015 | NUS | 2015_KY_LEX | 46 | KY06C-2020-11-12-1 | 36.2 | 7.7  | 4.1  |
| 2015 | NUS | 2015_KY_LEX | 47 | MO122246           | 18.6 | 5.1  | 2.7  |
| 2015 | NUS | 2015_KY_LEX | 48 | MO130203           | 44.5 | 5.1  | 4.2  |
| 2015 | NUS | 2015_KY_LEX | 49 | MO130765           | 44.5 | 6.1  | 3.8  |
| 2015 | NUS | 2015_KY_LEX | 50 | MO131838           | 23.1 | 6.9  | 3.9  |

|      |     |             |    |                   |      |      |      |
|------|-----|-------------|----|-------------------|------|------|------|
| 2015 | NUS | 2015_KY_LEX | 51 | NE05548           | 41.2 | 8.6  | 5.8  |
| 2015 | NUS | 2015_KY_LEX | 52 | NE10589           | 47.9 | 16.3 | 12.7 |
| 2015 | NUS | 2015_KY_LEX | 53 | NW13455           | 32.6 | 10.9 | 9.9  |
| 2015 | NUS | 2015_KY_LEX | 54 | NE13511           | 31.5 | 12.3 | 8.0  |
| 2015 | NUS | 2015_KY_LEX | 55 | NE06545           | 32.8 | 12.6 | 6.9  |
| 2015 | NUS | 2015_KY_LEX | 56 | VA11W-108         | 34.5 | 11.6 | 6.7  |
| 2015 | NUS | 2015_KY_LEX | 57 | VA11W-182         | 41.3 | 19.3 | 10.4 |
| 2015 | NUS | 2015_KY_LEX | 58 | VA12W-150         | 48.4 | 10.1 | 6.7  |
| 2015 | NUS | 2015_KY_LEX | 59 | VA12FHB-4         | 24.1 | 8.4  | 3.6  |
| 2015 | NUS | 2015_KY_LEX | 60 | VA12FHB-55        | 22.9 | 7.4  | 4.8  |
| 2015 | NUS | 2015_NE_MEA | 1  | TRUMAN            | 6.0  | 25.0 | 15.3 |
| 2015 | NUS | 2015_NE_MEA | 2  | ERNIE             | 23.7 | 19.0 | NA   |
| 2015 | NUS | 2015_NE_MEA | 3  | FREEDOM           | 20.7 | 25.0 | NA   |
| 2015 | NUS | 2015_NE_MEA | 4  | PIONEER2545       | 29.3 | NA   | 36.9 |
| 2015 | NUS | 2015_NE_MEA | 5  | NY99056-161       | 13.7 | 30.0 | 12.8 |
| 2015 | NUS | 2015_NE_MEA | 6  | NY09067-2-69-1097 | 25.3 | 30.0 | 30.5 |
| 2015 | NUS | 2015_NE_MEA | 7  | NY05152-818       | 8.3  | 29.0 | 15.2 |
| 2015 | NUS | 2015_NE_MEA | 8  | NY05152-825       | 11.7 | 17.0 | NA   |
| 2015 | NUS | 2015_NE_MEA | 9  | NY05152-821       | 16.7 | 11.0 | NA   |
| 2015 | NUS | 2015_NE_MEA | 10 | KWS050            | 22.3 | 33.0 | 15.3 |
| 2015 | NUS | 2015_NE_MEA | 11 | KWS051            | 26.3 | 31.0 | NA   |
| 2015 | NUS | 2015_NE_MEA | 12 | KWS052            | 42.7 | 15.0 | 13.1 |
| 2015 | NUS | 2015_NE_MEA | 13 | KWS036            | 26.7 | 40.0 | 32.9 |
| 2015 | NUS | 2015_NE_MEA | 14 | ES12-3030         | 40.3 | NA   | 22.1 |
| 2015 | NUS | 2015_NE_MEA | 15 | ES12-1358         | 22.0 | NA   | 10.2 |
| 2015 | NUS | 2015_NE_MEA | 16 | ES12-1275         | 18.0 | 14.0 | NA   |
| 2015 | NUS | 2015_NE_MEA | 17 | F1014             | 10.7 | 28.0 | 18.9 |
| 2015 | NUS | 2015_NE_MEA | 18 | E6012             | 34.7 | 40.0 | 22.3 |
| 2015 | NUS | 2015_NE_MEA | 19 | OH09-207-24       | 18.3 | 24.0 | NA   |
| 2015 | NUS | 2015_NE_MEA | 20 | OH09-281-10       | 40.7 | 26.0 | 21.6 |
| 2015 | NUS | 2015_NE_MEA | 21 | OH10-200-49       | 11.7 | NA   | 11.5 |
| 2015 | NUS | 2015_NE_MEA | 22 | 10641B1-9-11-7    | 17.3 | 30.0 | 9.7  |
| 2015 | NUS | 2015_NE_MEA | 23 | 0762A1-2-8        | 13.3 | NA   | 11.9 |
| 2015 | NUS | 2015_NE_MEA | 24 | 08334A1-31        | 22.3 | 31.0 | NA   |
| 2015 | NUS | 2015_NE_MEA | 25 | 0566A1-3-1-6      | 37.7 | NA   | 11.9 |
| 2015 | NUS | 2015_NE_MEA | 26 | 10512RA1-8        | 17.0 | 30.0 | 19.4 |
| 2015 | NUS | 2015_NE_MEA | 27 | M11-2024          | 33.7 | NA   | 21.6 |
| 2015 | NUS | 2015_NE_MEA | 28 | M12-3312CW        | 13.3 | 65.0 | 21.6 |
| 2015 | NUS | 2015_NE_MEA | 29 | M12-3301          | 18.3 | NA   | 21.0 |
| 2015 | NUS | 2015_NE_MEA | 30 | M12-2036          | 12.4 | NA   | 17.4 |
| 2015 | NUS | 2015_NE_MEA | 31 | M12-2031          | 13.0 | NA   | 15.0 |
| 2015 | NUS | 2015_NE_MEA | 32 | CA9-72            | 35.3 | 33.0 | NA   |
| 2015 | NUS | 2015_NE_MEA | 33 | CA9-76            | 44.3 | NA   | 14.0 |
| 2015 | NUS | 2015_NE_MEA | 34 | DH5-15            | 29.3 | 29.0 | 19.4 |
| 2015 | NUS | 2015_NE_MEA | 35 | CA13-53           | 21.6 | 27.0 | 22.9 |
| 2015 | NUS | 2015_NE_MEA | 36 | CA13-63           | 19.0 | NA   | 8.2  |
| 2015 | NUS | 2015_NE_MEA | 37 | IL10-19464        | 29.3 | 29.0 | 14.8 |
| 2015 | NUS | 2015_NE_MEA | 38 | IL10-21934        | 27.7 | NA   | NA   |
| 2015 | NUS | 2015_NE_MEA | 39 | IL10-21937        | 32.3 | NA   | NA   |

|      |     |             |    |                    |      |      |      |
|------|-----|-------------|----|--------------------|------|------|------|
| 2015 | NUS | 2015_NE_MEA | 40 | IL11-36131         | 25.3 | 18.0 | NA   |
| 2015 | NUS | 2015_NE_MEA | 41 | IL11-27667         | 25.3 | NA   | 8.2  |
| 2015 | NUS | 2015_NE_MEA | 42 | KY06C-1195-37-2-5  | 36.0 | NA   | 14.8 |
| 2015 | NUS | 2015_NE_MEA | 43 | KY06C-1201-18-6-3  | 20.3 | 20.0 | 7.8  |
| 2015 | NUS | 2015_NE_MEA | 44 | KY06C-1107-7-2-5   | 24.0 | 30.0 | 15.7 |
| 2015 | NUS | 2015_NE_MEA | 45 | KY06C-2020-10-5-3  | 24.0 | 29.0 | 16.8 |
| 2015 | NUS | 2015_NE_MEA | 46 | KY06C-2020-11-12-1 | 17.0 | 20.0 | 9.8  |
| 2015 | NUS | 2015_NE_MEA | 47 | MO122246           | 14.0 | NA   | 13.7 |
| 2015 | NUS | 2015_NE_MEA | 48 | MO130203           | 21.7 | NA   | 14.4 |
| 2015 | NUS | 2015_NE_MEA | 49 | MO130765           | 14.3 | 21.0 | 10.9 |
| 2015 | NUS | 2015_NE_MEA | 50 | MO131838           | 16.7 | 20.0 | 9.7  |
| 2015 | NUS | 2015_NE_MEA | 51 | NE05548            | 27.0 | 32.0 | 18.9 |
| 2015 | NUS | 2015_NE_MEA | 52 | NE10589            | 37.0 | 45.0 | NA   |
| 2015 | NUS | 2015_NE_MEA | 53 | NW13455            | 29.3 | NA   | 28.7 |
| 2015 | NUS | 2015_NE_MEA | 54 | NE13511            | 28.7 | 31.0 | 25.8 |
| 2015 | NUS | 2015_NE_MEA | 55 | NE06545            | 38.0 | NA   | 24.9 |
| 2015 | NUS | 2015_NE_MEA | 56 | VA11W-108          | 45.0 | NA   | 10.0 |
| 2015 | NUS | 2015_NE_MEA | 57 | VA11W-182          | 40.0 | 29.0 | 16.6 |
| 2015 | NUS | 2015_NE_MEA | 58 | VA12W-150          | 31.3 | NA   | 12.7 |
| 2015 | NUS | 2015_NE_MEA | 59 | VA12FHB-4          | 27.3 | NA   | 11.3 |
| 2015 | NUS | 2015_NE_MEA | 60 | VA12FHB-55         | 46.3 | 17.0 | NA   |
| 2015 | NUS | 2015_ON_RID | 1  | TRUMAN             | 66.0 | NA   | NA   |
| 2015 | NUS | 2015_ON_RID | 2  | ERNIE              | 54.0 | NA   | NA   |
| 2015 | NUS | 2015_ON_RID | 3  | FREEDOM            | 55.0 | NA   | NA   |
| 2015 | NUS | 2015_ON_RID | 4  | PIONEER2545        | 79.6 | NA   | NA   |
| 2015 | NUS | 2015_ON_RID | 5  | NY99056-161        | 65.0 | NA   | NA   |
| 2015 | NUS | 2015_ON_RID | 6  | NY09067-2-69-1097  | 59.3 | NA   | NA   |
| 2015 | NUS | 2015_ON_RID | 7  | NY05152-818        | 85.3 | NA   | NA   |
| 2015 | NUS | 2015_ON_RID | 8  | NY05152-825        | 66.6 | NA   | NA   |
| 2015 | NUS | 2015_ON_RID | 9  | NY05152-821        | 58.6 | NA   | NA   |
| 2015 | NUS | 2015_ON_RID | 10 | KWS050             | 79.0 | NA   | NA   |
| 2015 | NUS | 2015_ON_RID | 11 | KWS051             | 66.0 | NA   | NA   |
| 2015 | NUS | 2015_ON_RID | 12 | KWS052             | 34.7 | NA   | NA   |
| 2015 | NUS | 2015_ON_RID | 13 | KWS036             | 79.0 | NA   | NA   |
| 2015 | NUS | 2015_ON_RID | 14 | ES12-3030          | 34.7 | NA   | NA   |
| 2015 | NUS | 2015_ON_RID | 15 | ES12-1358          | 38.0 | NA   | NA   |
| 2015 | NUS | 2015_ON_RID | 16 | ES12-1275          | 49.7 | NA   | NA   |
| 2015 | NUS | 2015_ON_RID | 17 | F1014              | 79.0 | NA   | NA   |
| 2015 | NUS | 2015_ON_RID | 18 | E6012              | 65.0 | NA   | NA   |
| 2015 | NUS | 2015_ON_RID | 19 | OH09-207-24        | 78.3 | NA   | NA   |
| 2015 | NUS | 2015_ON_RID | 20 | OH09-281-10        | 70.3 | NA   | NA   |
| 2015 | NUS | 2015_ON_RID | 21 | OH10-200-49        | 70.3 | NA   | NA   |
| 2015 | NUS | 2015_ON_RID | 22 | 10641B1-9-11-7     | 59.7 | NA   | NA   |
| 2015 | NUS | 2015_ON_RID | 23 | 0762A1-2-8         | 22.7 | NA   | NA   |
| 2015 | NUS | 2015_ON_RID | 24 | 08334A1-31         | 44.3 | NA   | NA   |
| 2015 | NUS | 2015_ON_RID | 25 | 0566A1-3-1-6       | 44.3 | NA   | NA   |
| 2015 | NUS | 2015_ON_RID | 26 | 10512RA1-8         | 45.7 | NA   | NA   |
| 2015 | NUS | 2015_ON_RID | 27 | M11-2024           | 44.0 | NA   | NA   |
| 2015 | NUS | 2015_ON_RID | 28 | M12-3312CW         | 44.3 | NA   | NA   |

|      |     |             |    |                    |      |      |      |
|------|-----|-------------|----|--------------------|------|------|------|
| 2015 | NUS | 2015_ON_RID | 29 | M12-3301           | 32.3 | NA   | NA   |
| 2015 | NUS | 2015_ON_RID | 30 | M12-2036           | 34.7 | NA   | NA   |
| 2015 | NUS | 2015_ON_RID | 31 | M12-2031           | 49.7 | NA   | NA   |
| 2015 | NUS | 2015_ON_RID | 32 | CA9-72             | 70.3 | NA   | NA   |
| 2015 | NUS | 2015_ON_RID | 33 | CA9-76             | 79.0 | NA   | NA   |
| 2015 | NUS | 2015_ON_RID | 34 | DH5-15             | 82.0 | NA   | NA   |
| 2015 | NUS | 2015_ON_RID | 35 | CA13-53            | 70.3 | NA   | NA   |
| 2015 | NUS | 2015_ON_RID | 36 | CA13-63            | 44.3 | NA   | NA   |
| 2015 | NUS | 2015_ON_RID | 37 | IL10-19464         | 48.3 | NA   | NA   |
| 2015 | NUS | 2015_ON_RID | 38 | IL10-21934         | 65.0 | NA   | NA   |
| 2015 | NUS | 2015_ON_RID | 39 | IL10-21937         | 49.7 | NA   | NA   |
| 2015 | NUS | 2015_ON_RID | 40 | IL11-36131         | 38.7 | NA   | NA   |
| 2015 | NUS | 2015_ON_RID | 41 | IL11-27667         | 30.7 | NA   | NA   |
| 2015 | NUS | 2015_ON_RID | 42 | KY06C-1195-37-2-5  | 68.7 | NA   | NA   |
| 2015 | NUS | 2015_ON_RID | 43 | KY06C-1201-18-6-3  | 40.0 | NA   | NA   |
| 2015 | NUS | 2015_ON_RID | 44 | KY06C-1107-7-2-5   | 63.3 | NA   | NA   |
| 2015 | NUS | 2015_ON_RID | 45 | KY06C-2020-10-5-3  | 55.0 | NA   | NA   |
| 2015 | NUS | 2015_ON_RID | 46 | KY06C-2020-11-12-1 | 44.3 | NA   | NA   |
| 2015 | NUS | 2015_ON_RID | 47 | MO122246           | 34.7 | NA   | NA   |
| 2015 | NUS | 2015_ON_RID | 48 | MO130203           | 59.3 | NA   | NA   |
| 2015 | NUS | 2015_ON_RID | 49 | MO130765           | 55.3 | NA   | NA   |
| 2015 | NUS | 2015_ON_RID | 50 | MO131838           | 60.7 | NA   | NA   |
| 2015 | NUS | 2015_ON_RID | 51 | NE05548            | 59.3 | NA   | NA   |
| 2015 | NUS | 2015_ON_RID | 52 | NE10589            | 63.0 | NA   | NA   |
| 2015 | NUS | 2015_ON_RID | 53 | NW13455            | 58.7 | NA   | NA   |
| 2015 | NUS | 2015_ON_RID | 54 | NE13511            | 78.3 | NA   | NA   |
| 2015 | NUS | 2015_ON_RID | 55 | NE06545            | 60.7 | NA   | NA   |
| 2015 | NUS | 2015_ON_RID | 56 | VA11W-108          | 44.0 | NA   | NA   |
| 2015 | NUS | 2015_ON_RID | 57 | VA11W-182          | 60.7 | NA   | NA   |
| 2015 | NUS | 2015_ON_RID | 58 | VA12W-150          | 59.3 | NA   | NA   |
| 2015 | NUS | 2015_ON_RID | 59 | VA12FHB-4          | 22.7 | NA   | NA   |
| 2015 | NUS | 2015_ON_RID | 60 | VA12FHB-55         | 44.3 | NA   | NA   |
| 2015 | NUS | 2015_IL_URB | 1  | TRUMAN             | 33.5 | 6.7  | 4.4  |
| 2015 | NUS | 2015_IL_URB | 2  | ERNIE              | 32.0 | 23.3 | 4.6  |
| 2015 | NUS | 2015_IL_URB | 3  | FREEDOM            | 43.0 | 21.7 | 2.7  |
| 2015 | NUS | 2015_IL_URB | 4  | PIONEER2545        | 80.0 | 58.3 | 12.3 |
| 2015 | NUS | 2015_IL_URB | 5  | NY99056-161        | 22.7 | 21.7 | 4.6  |
| 2015 | NUS | 2015_IL_URB | 6  | NY09067-2-69-1097  | 50.4 | 15.0 | 2.6  |
| 2015 | NUS | 2015_IL_URB | 7  | NY05152-818        | 38.4 | 11.7 | 2.9  |
| 2015 | NUS | 2015_IL_URB | 8  | NY05152-825        | 41.4 | 21.7 | 2.9  |
| 2015 | NUS | 2015_IL_URB | 9  | NY05152-821        | 26.5 | 16.7 | 3.5  |
| 2015 | NUS | 2015_IL_URB | 10 | KWS050             | 35.3 | 18.3 | 4.1  |
| 2015 | NUS | 2015_IL_URB | 11 | KWS051             | 56.1 | 23.3 | 3.8  |
| 2015 | NUS | 2015_IL_URB | 12 | KWS052             | 77.6 | 13.3 | 2.6  |
| 2015 | NUS | 2015_IL_URB | 13 | KWS036             | 75.3 | 16.7 | 9.9  |
| 2015 | NUS | 2015_IL_URB | 14 | ES12-3030          | 34.3 | 26.7 | 2.5  |
| 2015 | NUS | 2015_IL_URB | 15 | ES12-1358          | 36.5 | 8.3  | 1.5  |
| 2015 | NUS | 2015_IL_URB | 16 | ES12-1275          | 30.6 | 6.7  | 1.6  |
| 2015 | NUS | 2015_IL_URB | 17 | F1014              | 53.6 | 33.3 | 7.8  |

|      |     |             |    |                    |      |      |     |
|------|-----|-------------|----|--------------------|------|------|-----|
| 2015 | NUS | 2015_IL_URB | 18 | E6012              | 76.2 | 13.3 | 7.5 |
| 2015 | NUS | 2015_IL_URB | 19 | OH09-207-24        | 37.0 | 10.0 | 2.7 |
| 2015 | NUS | 2015_IL_URB | 20 | OH09-281-10        | 36.3 | 38.3 | 2.0 |
| 2015 | NUS | 2015_IL_URB | 21 | OH10-200-49        | 28.9 | 5.3  | 1.5 |
| 2015 | NUS | 2015_IL_URB | 22 | 10641B1-9-11-7     | 15.7 | 38.3 | 7.4 |
| 2015 | NUS | 2015_IL_URB | 23 | 0762A1-2-8         | 18.1 | 20.0 | 0.7 |
| 2015 | NUS | 2015_IL_URB | 24 | 08334A1-31         | 38.7 | 6.7  | 1.7 |
| 2015 | NUS | 2015_IL_URB | 25 | 0566A1-3-1-6       | 42.3 | 10.0 | 2.2 |
| 2015 | NUS | 2015_IL_URB | 26 | 10512RA1-8         | 16.5 | 30.0 | 5.3 |
| 2015 | NUS | 2015_IL_URB | 27 | M11-2024           | 61.5 | 16.7 | 6.2 |
| 2015 | NUS | 2015_IL_URB | 28 | M12-3312CW         | 16.8 | 11.7 | 7.5 |
| 2015 | NUS | 2015_IL_URB | 29 | M12-3301           | 55.5 | 8.3  | 1.8 |
| 2015 | NUS | 2015_IL_URB | 30 | M12-2036           | 26.8 | 13.3 | 5.6 |
| 2015 | NUS | 2015_IL_URB | 31 | M12-2031           | 35.9 | 15.0 | 5.8 |
| 2015 | NUS | 2015_IL_URB | 32 | CA9-72             | 74.1 | 18.3 | 7.2 |
| 2015 | NUS | 2015_IL_URB | 33 | CA9-76             | 43.3 | 11.7 | 4.7 |
| 2015 | NUS | 2015_IL_URB | 34 | DH5-15             | 22.6 | 18.3 | 3.0 |
| 2015 | NUS | 2015_IL_URB | 35 | CA13-53            | 31.0 | 16.7 | 2.6 |
| 2015 | NUS | 2015_IL_URB | 36 | CA13-63            | 21.0 | 11.7 | 2.5 |
| 2015 | NUS | 2015_IL_URB | 37 | IL10-19464         | 34.5 | 3.7  | 1.6 |
| 2015 | NUS | 2015_IL_URB | 38 | IL10-21934         | 26.1 | 5.3  | 1.8 |
| 2015 | NUS | 2015_IL_URB | 39 | IL10-21937         | 25.9 | 5.3  | 2.8 |
| 2015 | NUS | 2015_IL_URB | 40 | IL11-36131         | 23.0 | 3.7  | 1.5 |
| 2015 | NUS | 2015_IL_URB | 41 | IL11-27667         | 31.8 | 3.7  | 1.4 |
| 2015 | NUS | 2015_IL_URB | 42 | KY06C-1195-37-2-5  | 42.0 | 11.7 | 3.0 |
| 2015 | NUS | 2015_IL_URB | 43 | KY06C-1201-18-6-3  | 30.2 | 10.0 | 1.8 |
| 2015 | NUS | 2015_IL_URB | 44 | KY06C-1107-7-2-5   | 30.6 | 13.3 | 2.8 |
| 2015 | NUS | 2015_IL_URB | 45 | KY06C-2020-10-5-3  | 80.3 | 8.3  | 2.5 |
| 2015 | NUS | 2015_IL_URB | 46 | KY06C-2020-11-12-1 | 37.8 | 8.3  | 1.0 |
| 2015 | NUS | 2015_IL_URB | 47 | MO122246           | 12.1 | 6.7  | 1.6 |
| 2015 | NUS | 2015_IL_URB | 48 | MO130203           | 44.7 | 8.3  | 2.8 |
| 2015 | NUS | 2015_IL_URB | 49 | MO130765           | 40.8 | 8.3  | 2.3 |
| 2015 | NUS | 2015_IL_URB | 50 | MO131838           | 19.0 | 5.0  | 1.7 |
| 2015 | NUS | 2015_IL_URB | 51 | NE05548            | 52.0 | 18.3 | 4.4 |
| 2015 | NUS | 2015_IL_URB | 52 | NE10589            | 62.7 | 30.0 | 7.6 |
| 2015 | NUS | 2015_IL_URB | 53 | NW13455            | 44.4 | 13.3 | 9.0 |
| 2015 | NUS | 2015_IL_URB | 54 | NE13511            | 43.7 | 16.7 | 3.2 |
| 2015 | NUS | 2015_IL_URB | 55 | NE06545            | 54.0 | 21.7 | 3.2 |
| 2015 | NUS | 2015_IL_URB | 56 | VA11W-108          | 70.9 | 23.3 | 3.4 |
| 2015 | NUS | 2015_IL_URB | 57 | VA11W-182          | 50.8 | 26.7 | 5.6 |
| 2015 | NUS | 2015_IL_URB | 58 | VA12W-150          | 68.7 | 15.0 | 3.5 |
| 2015 | NUS | 2015_IL_URB | 59 | VA12FHB-4          | 28.3 | 8.3  | 3.1 |
| 2015 | NUS | 2015_IL_URB | 60 | VA12FHB-55         | 20.1 | 5.0  | 1.9 |
| 2015 | NUS | 2015_OH_WO  |    |                    |      |      |     |
| 2015 | NUS | O           | 1  | TRUMAN             | NA   | 7.2  | 6.4 |
| 2015 | NUS | 2015_OH_WO  |    |                    |      |      |     |
| 2015 | NUS | O           | 2  | ERNIE              | NA   | 7.5  | 4.0 |
| 2015 | NUS | 2015_OH_WO  |    |                    |      |      |     |
| 2015 | NUS | O           | 3  | FREEDOM            | NA   | 8.3  | 4.0 |

|      |     |                 |    |                   |    |      |      |
|------|-----|-----------------|----|-------------------|----|------|------|
| 2015 | NUS | 2015_OH_WO<br>O | 4  | PIIONEER2545      | NA | 19.2 | 27.2 |
| 2015 | NUS | 2015_OH_WO<br>O | 5  | NY99056-161       | NA | 8.9  | 24.3 |
| 2015 | NUS | 2015_OH_WO<br>O | 6  | NY09067-2-69-1097 | NA | 15.0 | 8.3  |
| 2015 | NUS | 2015_OH_WO<br>O | 7  | NY05152-818       | NA | 17.5 | 16.6 |
| 2015 | NUS | 2015_OH_WO<br>O | 8  | NY05152-825       | NA | 22.5 | 12.7 |
| 2015 | NUS | 2015_OH_WO<br>O | 9  | NY05152-821       | NA | 21.9 | 22.0 |
| 2015 | NUS | 2015_OH_WO<br>O | 10 | KWS050            | NA | 18.9 | 16.6 |
| 2015 | NUS | 2015_OH_WO<br>O | 11 | KWS051            | NA | 18.3 | 5.8  |
| 2015 | NUS | 2015_OH_WO<br>O | 12 | KWS052            | NA | 9.7  | 6.5  |
| 2015 | NUS | 2015_OH_WO<br>O | 13 | KWS036            | NA | 10.8 | 31.8 |
| 2015 | NUS | 2015_OH_WO<br>O | 14 | ES12-3030         | NA | 10.3 | 5.8  |
| 2015 | NUS | 2015_OH_WO<br>O | 15 | ES12-1358         | NA | 8.3  | 3.0  |
| 2015 | NUS | 2015_OH_WO<br>O | 16 | ES12-1275         | NA | 10.0 | 4.3  |
| 2015 | NUS | 2015_OH_WO<br>O | 17 | F1014             | NA | 6.4  | 21.0 |
| 2015 | NUS | 2015_OH_WO<br>O | 18 | E6012             | NA | 7.9  | 23.3 |
| 2015 | NUS | 2015_OH_WO<br>O | 19 | OH09-207-24       | NA | 13.9 | 7.1  |
| 2015 | NUS | 2015_OH_WO<br>O | 20 | OH09-281-10       | NA | 5.4  | 7.6  |
| 2015 | NUS | 2015_OH_WO<br>O | 21 | OH10-200-49       | NA | 4.6  | 6.1  |
| 2015 | NUS | 2015_OH_WO<br>O | 22 | 10641B1-9-11-7    | NA | 7.5  | 5.6  |
| 2015 | NUS | 2015_OH_WO<br>O | 23 | 0762A1-2-8        | NA | 4.4  | 3.1  |
| 2015 | NUS | 2015_OH_WO<br>O | 24 | 08334A1-31        | NA | 9.7  | 6.0  |
| 2015 | NUS | 2015_OH_WO<br>O | 25 | 0566A1-3-1-6      | NA | 6.7  | 4.4  |
| 2015 | NUS | 2015_OH_WO<br>O | 26 | 10512RA1-8        | NA | 3.9  | 9.6  |
| 2015 | NUS | 2015_OH_WO<br>O | 27 | M11-2024          | NA | 6.1  | 14.9 |
| 2015 | NUS | 2015_OH_WO<br>O | 28 | M12-3312CW        | NA | 5.8  | 24.5 |
| 2015 | NUS | 2015_OH_WO<br>O | 29 | M12-3301          | NA | 4.4  | 5.6  |
| 2015 | NUS | 2015_OH_WO<br>O | 30 | M12-2036          | NA | 4.4  | 17.4 |
| 2015 | NUS | 2015_OH_WO<br>O | 31 | M12-2031          | NA | 5.3  | 26.7 |

|      |     |                 |    |                    |    |      |      |
|------|-----|-----------------|----|--------------------|----|------|------|
| 2015 | NUS | 2015_OH_WO<br>O | 32 | CA9-72             | NA | 14.4 | 17.1 |
| 2015 | NUS | 2015_OH_WO<br>O | 33 | CA9-76             | NA | 11.7 | 11.3 |
| 2015 | NUS | 2015_OH_WO<br>O | 34 | DH5-15             | NA | 10.4 | 14.7 |
| 2015 | NUS | 2015_OH_WO<br>O | 35 | CA13-53            | NA | 22.5 | 15.1 |
| 2015 | NUS | 2015_OH_WO<br>O | 36 | CA13-63            | NA | 17.2 | 14.0 |
| 2015 | NUS | 2015_OH_WO<br>O | 37 | IL10-19464         | NA | 10.1 | 4.6  |
| 2015 | NUS | 2015_OH_WO<br>O | 38 | IL10-21934         | NA | 7.5  | 5.1  |
| 2015 | NUS | 2015_OH_WO<br>O | 39 | IL10-21937         | NA | 7.5  | 4.8  |
| 2015 | NUS | 2015_OH_WO<br>O | 40 | IL11-36131         | NA | 3.8  | 4.3  |
| 2015 | NUS | 2015_OH_WO<br>O | 41 | IL11-27667         | NA | 3.3  | 2.0  |
| 2015 | NUS | 2015_OH_WO<br>O | 42 | KY06C-1195-37-2-5  | NA | 11.9 | 6.2  |
| 2015 | NUS | 2015_OH_WO<br>O | 43 | KY06C-1201-18-6-3  | NA | 11.7 | 7.7  |
| 2015 | NUS | 2015_OH_WO<br>O | 44 | KY06C-1107-7-2-5   | NA | 9.6  | 6.6  |
| 2015 | NUS | 2015_OH_WO<br>O | 45 | KY06C-2020-10-5-3  | NA | 16.7 | 6.0  |
| 2015 | NUS | 2015_OH_WO<br>O | 46 | KY06C-2020-11-12-1 | NA | 5.8  | 1.4  |
| 2015 | NUS | 2015_OH_WO<br>O | 47 | MO122246           | NA | 9.7  | 3.5  |
| 2015 | NUS | 2015_OH_WO<br>O | 48 | MO130203           | NA | 8.6  | 4.3  |
| 2015 | NUS | 2015_OH_WO<br>O | 49 | MO130765           | NA | 9.2  | 6.1  |
| 2015 | NUS | 2015_OH_WO<br>O | 50 | MO131838           | NA | 5.8  | 5.3  |
| 2015 | NUS | 2015_OH_WO<br>O | 51 | NE05548            | NA | 20.8 | 7.8  |
| 2015 | NUS | 2015_OH_WO<br>O | 52 | NE10589            | NA | 23.9 | 17.6 |
| 2015 | NUS | 2015_OH_WO<br>O | 53 | NW13455            | NA | 9.4  | 14.7 |
| 2015 | NUS | 2015_OH_WO<br>O | 54 | NE13511            | NA | 18.6 | 9.4  |
| 2015 | NUS | 2015_OH_WO<br>O | 55 | NE06545            | NA | 10.4 | 11.1 |
| 2015 | NUS | 2015_OH_WO<br>O | 56 | VA11W-108          | NA | 8.6  | 10.0 |
| 2015 | NUS | 2015_OH_WO<br>O | 57 | VA11W-182          | NA | 17.2 | 10.4 |
| 2015 | NUS | 2015_OH_WO<br>O | 58 | VA12W-150          | NA | 14.4 | 10.7 |
| 2015 | NUS | 2015_OH_WO<br>O | 59 | VA12FHB-4          | NA | 7.5  | 4.0  |



|      |     |                 |    |                    |      |      |     |
|------|-----|-----------------|----|--------------------|------|------|-----|
| 2015 | NUS | 2015_OH_WO<br>O | 60 | VA12FHB-55         | NA   | 11.4 | 1.7 |
| 2016 | NUS | 2016_IL_CHA     | 1  | TRUMAN             | 20.0 | NA   | NA  |
| 2016 | NUS | 2016_IL_CHA     | 2  | FREEDOM            | 25.0 | NA   | NA  |
| 2016 | NUS | 2016_IL_CHA     | 3  | ERNIE              | 60.0 | NA   | NA  |
| 2016 | NUS | 2016_IL_CHA     | 4  | PIONEER2545        | 50.0 | NA   | NA  |
| 2016 | NUS | 2016_IL_CHA     | 5  | OH10-219-65        | 60.0 | NA   | NA  |
| 2016 | NUS | 2016_IL_CHA     | 6  | OH09-207-68        | 30.0 | NA   | NA  |
| 2016 | NUS | 2016_IL_CHA     | 7  | OH08-206-69        | 30.0 | NA   | NA  |
| 2016 | NUS | 2016_IL_CHA     | 8  | OH11-118-18        | 10.0 | NA   | NA  |
| 2016 | NUS | 2016_IL_CHA     | 9  | KWS060             | 80.0 | NA   | NA  |
| 2016 | NUS | 2016_IL_CHA     | 10 | KWS072             | 45.0 | NA   | NA  |
| 2016 | NUS | 2016_IL_CHA     | 11 | KWS074             | 35.0 | NA   | NA  |
| 2016 | NUS | 2016_IL_CHA     | 12 | KWS078             | 20.0 | NA   | NA  |
| 2016 | NUS | 2016_IL_CHA     | 13 | KY09C-0052-26-12-3 | 35.0 | NA   | NA  |
| 2016 | NUS | 2016_IL_CHA     | 14 | X08C-1070-73-18-1  | 30.0 | NA   | NA  |
| 2016 | NUS | 2016_IL_CHA     | 15 | X09-0187-112-14-1  | 30.0 | NA   | NA  |
| 2016 | NUS | 2016_IL_CHA     | 16 | KY09C-1024-96-1-3  | 10.0 | NA   | NA  |
| 2016 | NUS | 2016_IL_CHA     | 17 | KY09C-0601-39-8-1  | 20.0 | NA   | NA  |
| 2016 | NUS | 2016_IL_CHA     | 18 | NY05158-833        | 20.0 | NA   | NA  |
| 2016 | NUS | 2016_IL_CHA     | 19 | NY05158-864        | 20.0 | NA   | NA  |
| 2016 | NUS | 2016_IL_CHA     | 20 | NY05158-841        | 20.0 | NA   | NA  |
| 2016 | NUS | 2016_IL_CHA     | 21 | NY05158-859        | 15.0 | NA   | NA  |
| 2016 | NUS | 2016_IL_CHA     | 22 | NY99069-352        | 85.0 | NA   | NA  |
| 2016 | NUS | 2016_IL_CHA     | 23 | VA14W-6            | 55.0 | NA   | NA  |
| 2016 | NUS | 2016_IL_CHA     | 24 | VA10W-21BSR124     | 90.0 | NA   | NA  |
| 2016 | NUS | 2016_IL_CHA     | 25 | VA14FHB-22         | 45.0 | NA   | NA  |
| 2016 | NUS | 2016_IL_CHA     | 26 | VA14FHB-31         | 35.0 | NA   | NA  |
| 2016 | NUS | 2016_IL_CHA     | 27 | MI14R0233          | 25.0 | NA   | NA  |
| 2016 | NUS | 2016_IL_CHA     | 28 | MI14R0082          | 10.0 | NA   | NA  |
| 2016 | NUS | 2016_IL_CHA     | 29 | MI14W0217          | 35.0 | NA   | NA  |
| 2016 | NUS | 2016_IL_CHA     | 30 | MI14R0080          | 25.0 | NA   | NA  |
| 2016 | NUS | 2016_IL_CHA     | 31 | MI14R0109          | 25.0 | NA   | NA  |
| 2016 | NUS | 2016_IL_CHA     | 32 | 0762A1-2-8         | 10.0 | NA   | NA  |
| 2016 | NUS | 2016_IL_CHA     | 33 | 05247A1-7-3-108-2  | 25.0 | NA   | NA  |
| 2016 | NUS | 2016_IL_CHA     | 34 | 0566A1-3-1-52      | 30.0 | NA   | NA  |
| 2016 | NUS | 2016_IL_CHA     | 35 | 05247A1-7-3-120    | 45.0 | NA   | NA  |
| 2016 | NUS | 2016_IL_CHA     | 36 | 04620A1-1-7-4-17   | 45.0 | NA   | NA  |
| 2016 | NUS | 2016_IL_CHA     | 37 | ES14-0937          | 45.0 | NA   | NA  |
| 2016 | NUS | 2016_IL_CHA     | 38 | ES14-1398          | 55.0 | NA   | NA  |
| 2016 | NUS | 2016_IL_CHA     | 39 | ES14-1860          | 20.0 | NA   | NA  |
| 2016 | NUS | 2016_IL_CHA     | 40 | ES14-1847          | 25.0 | NA   | NA  |
| 2016 | NUS | 2016_IL_CHA     | 41 | IL10-21934         | 45.0 | NA   | NA  |
| 2016 | NUS | 2016_IL_CHA     | 42 | IL10-21937         | 15.0 | NA   | NA  |
| 2016 | NUS | 2016_IL_CHA     | 43 | IL11-6543          | 25.0 | NA   | NA  |
| 2016 | NUS | 2016_IL_CHA     | 44 | IL11-28222         | 10.0 | NA   | NA  |
| 2016 | NUS | 2016_IL_CHA     | 45 | IL12-5110          | 30.0 | NA   | NA  |
| 2016 | NUS | 2016_IL_CHA     | 46 | NE13625            | 30.0 | NA   | NA  |
| 2016 | NUS | 2016_IL_CHA     | 47 | NE13515            | 50.0 | NA   | NA  |
| 2016 | NUS | 2016_IL_CHA     | 48 | NE05548            | 70.0 | NA   | NA  |

|      |     |             |    |                    |      |    |    |
|------|-----|-------------|----|--------------------|------|----|----|
| 2016 | NUS | 2016_IL_CHA | 49 | NE13604            | 15.0 | NA | NA |
| 2016 | NUS | 2016_IL_CHA | 50 | NI12702W           | 45.0 | NA | NA |
| 2016 | NUS | 2016_IL_HIG | 1  | TRUMAN             | 5.0  | NA | NA |
| 2016 | NUS | 2016_IL_HIG | 2  | FREEDOM            | 20.0 | NA | NA |
| 2016 | NUS | 2016_IL_HIG | 3  | ERNIE              | 50.0 | NA | NA |
| 2016 | NUS | 2016_IL_HIG | 4  | PIONEER2545        | 65.0 | NA | NA |
| 2016 | NUS | 2016_IL_HIG | 5  | OH10-219-65        | 12.5 | NA | NA |
| 2016 | NUS | 2016_IL_HIG | 6  | OH09-207-68        | 15.0 | NA | NA |
| 2016 | NUS | 2016_IL_HIG | 7  | OH08-206-69        | 22.5 | NA | NA |
| 2016 | NUS | 2016_IL_HIG | 8  | OH11-118-18        | 25.0 | NA | NA |
| 2016 | NUS | 2016_IL_HIG | 9  | KWS060             | 45.0 | NA | NA |
| 2016 | NUS | 2016_IL_HIG | 10 | KWS072             | 45.0 | NA | NA |
| 2016 | NUS | 2016_IL_HIG | 11 | KWS074             | 45.0 | NA | NA |
| 2016 | NUS | 2016_IL_HIG | 12 | KWS078             | 32.5 | NA | NA |
| 2016 | NUS | 2016_IL_HIG | 13 | KY09C-0052-26-12-3 | 30.0 | NA | NA |
| 2016 | NUS | 2016_IL_HIG | 14 | X08C-1070-73-18-1  | 97.5 | NA | NA |
| 2016 | NUS | 2016_IL_HIG | 15 | X09-0187-112-14-1  | 10.5 | NA | NA |
| 2016 | NUS | 2016_IL_HIG | 16 | KY09C-1024-96-1-3  | 17.5 | NA | NA |
| 2016 | NUS | 2016_IL_HIG | 17 | KY09C-0601-39-8-1  | 22.5 | NA | NA |
| 2016 | NUS | 2016_IL_HIG | 18 | NY05158-833        | 12.5 | NA | NA |
| 2016 | NUS | 2016_IL_HIG | 19 | NY05158-864        | 10.0 | NA | NA |
| 2016 | NUS | 2016_IL_HIG | 20 | NY05158-841        | 27.5 | NA | NA |
| 2016 | NUS | 2016_IL_HIG | 21 | NY05158-859        | 15.0 | NA | NA |
| 2016 | NUS | 2016_IL_HIG | 22 | NY99069-352        | 45.0 | NA | NA |
| 2016 | NUS | 2016_IL_HIG | 23 | VA14W-6            | 27.5 | NA | NA |
| 2016 | NUS | 2016_IL_HIG | 24 | VA10W-21BSR124     | 45.0 | NA | NA |
| 2016 | NUS | 2016_IL_HIG | 25 | VA14FHB-22         | 27.5 | NA | NA |
| 2016 | NUS | 2016_IL_HIG | 26 | VA14FHB-31         | 50.0 | NA | NA |
| 2016 | NUS | 2016_IL_HIG | 27 | MI14R0233          | 7.5  | NA | NA |
| 2016 | NUS | 2016_IL_HIG | 28 | MI14R0082          | 3.0  | NA | NA |
| 2016 | NUS | 2016_IL_HIG | 29 | MI14W0217          | 22.5 | NA | NA |
| 2016 | NUS | 2016_IL_HIG | 30 | MI14R0080          | 45.0 | NA | NA |
| 2016 | NUS | 2016_IL_HIG | 31 | MI14R0109          | 15.0 | NA | NA |
| 2016 | NUS | 2016_IL_HIG | 32 | 0762A1-2-8         | 2.5  | NA | NA |
| 2016 | NUS | 2016_IL_HIG | 33 | 05247A1-7-3-108-2  | 7.5  | NA | NA |
| 2016 | NUS | 2016_IL_HIG | 34 | 0566A1-3-1-52      | 27.5 | NA | NA |
| 2016 | NUS | 2016_IL_HIG | 35 | 05247A1-7-3-120    | 12.5 | NA | NA |
| 2016 | NUS | 2016_IL_HIG | 36 | 04620A1-1-7-4-17   | 25.0 | NA | NA |
| 2016 | NUS | 2016_IL_HIG | 37 | ES14-0937          | 20.0 | NA | NA |
| 2016 | NUS | 2016_IL_HIG | 38 | ES14-1398          | 27.5 | NA | NA |
| 2016 | NUS | 2016_IL_HIG | 39 | ES14-1860          | 22.5 | NA | NA |
| 2016 | NUS | 2016_IL_HIG | 40 | ES14-1847          | 45.0 | NA | NA |
| 2016 | NUS | 2016_IL_HIG | 41 | IL10-21934         | 45.0 | NA | NA |
| 2016 | NUS | 2016_IL_HIG | 42 | IL10-21937         | 27.5 | NA | NA |
| 2016 | NUS | 2016_IL_HIG | 43 | IL11-6543          | 35.0 | NA | NA |
| 2016 | NUS | 2016_IL_HIG | 44 | IL11-28222         | 10.0 | NA | NA |
| 2016 | NUS | 2016_IL_HIG | 45 | IL12-5110          | 10.0 | NA | NA |
| 2016 | NUS | 2016_IL_HIG | 46 | NE13625            | 62.5 | NA | NA |
| 2016 | NUS | 2016_IL_HIG | 47 | NE13515            | 45.0 | NA | NA |

|      |     |             |    |                    |      |      |     |
|------|-----|-------------|----|--------------------|------|------|-----|
| 2016 | NUS | 2016_IL_HIG | 48 | NE05548            | 30.0 | NA   | NA  |
| 2016 | NUS | 2016_IL_HIG | 49 | NE13604            | 15.0 | NA   | NA  |
| 2016 | NUS | 2016_IL_HIG | 50 | NI12702W           | 17.5 | NA   | NA  |
| 2016 | NUS | 2016_IL_URB | 1  | TRUMAN             | 36.2 | 15.0 | 0.8 |
| 2016 | NUS | 2016_IL_URB | 2  | FREEDOM            | 44.4 | 50.0 | 1.9 |
| 2016 | NUS | 2016_IL_URB | 3  | ERNIE              | 55.7 | 53.3 | 2.6 |
| 2016 | NUS | 2016_IL_URB | 4  | PIONEER2545        | 72.9 | 80.0 | 7.1 |
| 2016 | NUS | 2016_IL_URB | 5  | OH10-219-65        | 52.5 | 28.3 | 1.8 |
| 2016 | NUS | 2016_IL_URB | 6  | OH09-207-68        | 22.7 | 36.7 | 1.4 |
| 2016 | NUS | 2016_IL_URB | 7  | OH08-206-69        | 36.4 | 53.3 | 1.2 |
| 2016 | NUS | 2016_IL_URB | 8  | OH11-118-18        | 13.3 | 30.0 | 0.4 |
| 2016 | NUS | 2016_IL_URB | 9  | KWS060             | 55.4 | 33.3 | 2.0 |
| 2016 | NUS | 2016_IL_URB | 10 | KWS072             | 37.4 | 23.3 | 4.5 |
| 2016 | NUS | 2016_IL_URB | 11 | KWS074             | 34.3 | 23.3 | 0.8 |
| 2016 | NUS | 2016_IL_URB | 12 | KWS078             | 48.2 | 26.7 | 1.1 |
| 2016 | NUS | 2016_IL_URB | 13 | KY09C-0052-26-12-3 | 19.0 | 6.7  | 0.8 |
| 2016 | NUS | 2016_IL_URB | 14 | X08C-1070-73-18-1  | 13.7 | 11.7 | 0.9 |
| 2016 | NUS | 2016_IL_URB | 15 | X09-0187-112-14-1  | 42.0 | 40.0 | 1.8 |
| 2016 | NUS | 2016_IL_URB | 16 | KY09C-1024-96-1-3  | 57.3 | 26.7 | 1.3 |
| 2016 | NUS | 2016_IL_URB | 17 | KY09C-0601-39-8-1  | 65.4 | 38.3 | 0.5 |
| 2016 | NUS | 2016_IL_URB | 18 | NY05158-833        | 34.6 | 23.3 | 1.2 |
| 2016 | NUS | 2016_IL_URB | 19 | NY05158-864        | 51.1 | 23.3 | 1.9 |
| 2016 | NUS | 2016_IL_URB | 20 | NY05158-841        | 57.9 | 26.7 | 1.4 |
| 2016 | NUS | 2016_IL_URB | 21 | NY05158-859        | 45.2 | 30.0 | 1.5 |
| 2016 | NUS | 2016_IL_URB | 22 | NY99069-352        | 79.4 | 8.3  | 2.0 |
| 2016 | NUS | 2016_IL_URB | 23 | VA14W-6            | 35.7 | 23.3 | 3.5 |
| 2016 | NUS | 2016_IL_URB | 24 | VA10W-21BSR124     | 65.5 | 53.3 | 3.4 |
| 2016 | NUS | 2016_IL_URB | 25 | VA14FHB-22         | 77.6 | 16.7 | 2.0 |
| 2016 | NUS | 2016_IL_URB | 26 | VA14FHB-31         | 33.9 | 40.0 | 3.6 |
| 2016 | NUS | 2016_IL_URB | 27 | MI14R0233          | 62.5 | 10.0 | 1.2 |
| 2016 | NUS | 2016_IL_URB | 28 | MI14R0082          | 66.9 | 20.0 | 0.2 |
| 2016 | NUS | 2016_IL_URB | 29 | MI14W0217          | 47.7 | 6.7  | 1.5 |
| 2016 | NUS | 2016_IL_URB | 30 | MI14R0080          | 66.5 | 66.7 | 2.3 |
| 2016 | NUS | 2016_IL_URB | 31 | MI14R0109          | 34.8 | 20.0 | 2.8 |
| 2016 | NUS | 2016_IL_URB | 32 | 0762A1-2-8         | 15.1 | 16.7 | 1.3 |
| 2016 | NUS | 2016_IL_URB | 33 | 05247A1-7-3-108-2  | 21.9 | 20.0 | 2.1 |
| 2016 | NUS | 2016_IL_URB | 34 | 0566A1-3-1-52      | 38.2 | 33.3 | 1.6 |
| 2016 | NUS | 2016_IL_URB | 35 | 05247A1-7-3-120    | 56.6 | 16.7 | 1.9 |
| 2016 | NUS | 2016_IL_URB | 36 | 04620A1-1-7-4-17   | 62.2 | 13.3 | 2.0 |
| 2016 | NUS | 2016_IL_URB | 37 | ES14-0937          | 45.8 | 30.0 | 1.0 |
| 2016 | NUS | 2016_IL_URB | 38 | ES14-1398          | 39.5 | 15.0 | 1.3 |
| 2016 | NUS | 2016_IL_URB | 39 | ES14-1860          | 17.0 | 6.7  | 0.5 |
| 2016 | NUS | 2016_IL_URB | 40 | ES14-1847          | 58.5 | 36.7 | 3.4 |
| 2016 | NUS | 2016_IL_URB | 41 | IL10-21934         | 27.6 | 5.0  | 0.8 |
| 2016 | NUS | 2016_IL_URB | 42 | IL10-21937         | 23.8 | 15.0 | 1.0 |
| 2016 | NUS | 2016_IL_URB | 43 | IL11-6543          | 36.9 | 20.0 | 0.6 |
| 2016 | NUS | 2016_IL_URB | 44 | IL11-28222         | 14.4 | 8.3  | 0.7 |
| 2016 | NUS | 2016_IL_URB | 45 | IL12-5110          | 42.3 | 15.0 | 1.1 |
| 2016 | NUS | 2016_IL_URB | 46 | NE13625            | 53.0 | 6.7  | 1.6 |

|      |     |             |    |                    |      |      |     |
|------|-----|-------------|----|--------------------|------|------|-----|
| 2016 | NUS | 2016_IL_URB | 47 | NE13515            | 68.9 | 36.7 | 3.1 |
| 2016 | NUS | 2016_IL_URB | 48 | NE05548            | 79.9 | 40.0 | 2.0 |
| 2016 | NUS | 2016_IL_URB | 49 | NE13604            | 35.7 | 10.0 | 0.5 |
| 2016 | NUS | 2016_IL_URB | 50 | NI12702W           | 47.9 | 6.7  | 0.9 |
| 2016 | NUS | 2016_IN_WLA | 1  | TRUMAN             | 23.5 | NA   | NA  |
| 2016 | NUS | 2016_IN_WLA | 2  | FREEDOM            | NA   | NA   | NA  |
| 2016 | NUS | 2016_IN_WLA | 3  | ERNIE              | 26.2 | NA   | NA  |
| 2016 | NUS | 2016_IN_WLA | 4  | PIONEER2545        | 27.9 | NA   | NA  |
| 2016 | NUS | 2016_IN_WLA | 5  | OH10-219-65        | 18.4 | NA   | NA  |
| 2016 | NUS | 2016_IN_WLA | 6  | OH09-207-68        | 21.7 | NA   | NA  |
| 2016 | NUS | 2016_IN_WLA | 7  | OH08-206-69        | 19.8 | NA   | NA  |
| 2016 | NUS | 2016_IN_WLA | 8  | OH11-118-18        | 14.5 | NA   | NA  |
| 2016 | NUS | 2016_IN_WLA | 9  | KWS060             | 22.9 | NA   | NA  |
| 2016 | NUS | 2016_IN_WLA | 10 | KWS072             | 36.1 | NA   | NA  |
| 2016 | NUS | 2016_IN_WLA | 11 | KWS074             | 14.1 | NA   | NA  |
| 2016 | NUS | 2016_IN_WLA | 12 | KWS078             | 22.7 | NA   | NA  |
| 2016 | NUS | 2016_IN_WLA | 13 | KY09C-0052-26-12-3 | 22.7 | NA   | NA  |
| 2016 | NUS | 2016_IN_WLA | 14 | X08C-1070-73-18-1  | 14.1 | NA   | NA  |
| 2016 | NUS | 2016_IN_WLA | 15 | X09-0187-112-14-1  | 27.7 | NA   | NA  |
| 2016 | NUS | 2016_IN_WLA | 16 | KY09C-1024-96-1-3  | 8.5  | NA   | NA  |
| 2016 | NUS | 2016_IN_WLA | 17 | KY09C-0601-39-8-1  | 15.4 | NA   | NA  |
| 2016 | NUS | 2016_IN_WLA | 18 | NY05158-833        | 30.7 | NA   | NA  |
| 2016 | NUS | 2016_IN_WLA | 19 | NY05158-864        | 21.6 | NA   | NA  |
| 2016 | NUS | 2016_IN_WLA | 20 | NY05158-841        | 21.9 | NA   | NA  |
| 2016 | NUS | 2016_IN_WLA | 21 | NY05158-859        | 28.2 | NA   | NA  |
| 2016 | NUS | 2016_IN_WLA | 22 | NY99069-352        | 21.7 | NA   | NA  |
| 2016 | NUS | 2016_IN_WLA | 23 | VA14W-6            | 21.5 | NA   | NA  |
| 2016 | NUS | 2016_IN_WLA | 24 | VA10W-21BSR124     | 22.2 | NA   | NA  |
| 2016 | NUS | 2016_IN_WLA | 25 | VA14FHB-22         | 24.6 | NA   | NA  |
| 2016 | NUS | 2016_IN_WLA | 26 | VA14FHB-31         | 24.0 | NA   | NA  |
| 2016 | NUS | 2016_IN_WLA | 27 | MI14R0233          | 18.2 | NA   | NA  |
| 2016 | NUS | 2016_IN_WLA | 28 | MI14R0082          | 9.0  | NA   | NA  |
| 2016 | NUS | 2016_IN_WLA | 29 | MI14W0217          | 20.4 | NA   | NA  |
| 2016 | NUS | 2016_IN_WLA | 30 | MI14R0080          | 27.1 | NA   | NA  |
| 2016 | NUS | 2016_IN_WLA | 31 | MI14R0109          | 11.8 | NA   | NA  |
| 2016 | NUS | 2016_IN_WLA | 32 | 0762A1-2-8         | 9.8  | NA   | NA  |
| 2016 | NUS | 2016_IN_WLA | 33 | 05247A1-7-3-108-2  | 14.6 | NA   | NA  |
| 2016 | NUS | 2016_IN_WLA | 34 | 0566A1-3-1-52      | 20.5 | NA   | NA  |
| 2016 | NUS | 2016_IN_WLA | 35 | 05247A1-7-3-120    | 24.6 | NA   | NA  |
| 2016 | NUS | 2016_IN_WLA | 36 | 04620A1-1-7-4-17   | 15.1 | NA   | NA  |
| 2016 | NUS | 2016_IN_WLA | 37 | ES14-0937          | 20.1 | NA   | NA  |
| 2016 | NUS | 2016_IN_WLA | 38 | ES14-1398          | 22.3 | NA   | NA  |
| 2016 | NUS | 2016_IN_WLA | 39 | ES14-1860          | 19.6 | NA   | NA  |
| 2016 | NUS | 2016_IN_WLA | 40 | ES14-1847          | 20.6 | NA   | NA  |
| 2016 | NUS | 2016_IN_WLA | 41 | IL10-21934         | 15.5 | NA   | NA  |
| 2016 | NUS | 2016_IN_WLA | 42 | IL10-21937         | 9.9  | NA   | NA  |
| 2016 | NUS | 2016_IN_WLA | 43 | IL11-6543          | 18.0 | NA   | NA  |
| 2016 | NUS | 2016_IN_WLA | 44 | IL11-28222         | 15.4 | NA   | NA  |
| 2016 | NUS | 2016_IN_WLA | 45 | IL12-5110          | 16.5 | NA   | NA  |

|      |     |             |    |                    |      |      |      |
|------|-----|-------------|----|--------------------|------|------|------|
| 2016 | NUS | 2016_IN_WLA | 46 | NE13625            | 17.6 | NA   | NA   |
| 2016 | NUS | 2016_IN_WLA | 47 | NE13515            | 20.5 | NA   | NA   |
| 2016 | NUS | 2016_IN_WLA | 48 | NE05548            | 32.8 | NA   | NA   |
| 2016 | NUS | 2016_IN_WLA | 49 | NE13604            | 27.2 | NA   | NA   |
| 2016 | NUS | 2016_IN_WLA | 50 | NI12702W           | 28.2 | NA   | NA   |
| 2016 | NUS | 2016_KY_LEX | 1  | TRUMAN             | 10.5 | 5.0  | 10.1 |
| 2016 | NUS | 2016_KY_LEX | 2  | FREEDOM            | NA   | NA   | NA   |
| 2016 | NUS | 2016_KY_LEX | 3  | ERNIE              | 18.0 | 7.0  | 15.9 |
| 2016 | NUS | 2016_KY_LEX | 4  | PIONEER2545        | 32.3 | 12.8 | 26.8 |
| 2016 | NUS | 2016_KY_LEX | 5  | OH10-219-65        | 19.7 | 12.0 | 12.3 |
| 2016 | NUS | 2016_KY_LEX | 6  | OH09-207-68        | 14.0 | 12.3 | 15.9 |
| 2016 | NUS | 2016_KY_LEX | 7  | OH08-206-69        | 22.1 | 6.7  | 16.3 |
| 2016 | NUS | 2016_KY_LEX | 8  | OH11-118-18        | 9.5  | 2.7  | 8.5  |
| 2016 | NUS | 2016_KY_LEX | 9  | KWS060             | 22.0 | 4.6  | 12.3 |
| 2016 | NUS | 2016_KY_LEX | 10 | KWS072             | 28.6 | 8.9  | 19.5 |
| 2016 | NUS | 2016_KY_LEX | 11 | KWS074             | 20.5 | 11.2 | 18.5 |
| 2016 | NUS | 2016_KY_LEX | 12 | KWS078             | 26.2 | 5.1  | 19.9 |
| 2016 | NUS | 2016_KY_LEX | 13 | KY09C-0052-26-12-3 | 13.4 | 4.9  | 6.7  |
| 2016 | NUS | 2016_KY_LEX | 14 | X08C-1070-73-18-1  | 14.5 | 3.0  | 6.9  |
| 2016 | NUS | 2016_KY_LEX | 15 | X09-0187-112-14-1  | 16.7 | 7.7  | 16.0 |
| 2016 | NUS | 2016_KY_LEX | 16 | KY09C-1024-96-1-3  | 16.6 | 2.7  | 12.3 |
| 2016 | NUS | 2016_KY_LEX | 17 | KY09C-0601-39-8-1  | 15.4 | 3.5  | 7.7  |
| 2016 | NUS | 2016_KY_LEX | 18 | NY05158-833        | 32.6 | 13.5 | 17.9 |
| 2016 | NUS | 2016_KY_LEX | 19 | NY05158-864        | 27.8 | 7.7  | 18.1 |
| 2016 | NUS | 2016_KY_LEX | 20 | NY05158-841        | 22.0 | 3.1  | 17.1 |
| 2016 | NUS | 2016_KY_LEX | 21 | NY05158-859        | 28.2 | 5.6  | 16.5 |
| 2016 | NUS | 2016_KY_LEX | 22 | NY99069-352        | 23.6 | 6.8  | 38.5 |
| 2016 | NUS | 2016_KY_LEX | 23 | VA14W-6            | 27.3 | 5.6  | 23.3 |
| 2016 | NUS | 2016_KY_LEX | 24 | VA10W-21BSR124     | 29.8 | 8.9  | 24.6 |
| 2016 | NUS | 2016_KY_LEX | 25 | VA14FHB-22         | 23.9 | 5.6  | 11.6 |
| 2016 | NUS | 2016_KY_LEX | 26 | VA14FHB-31         | 35.2 | 6.3  | 20.4 |
| 2016 | NUS | 2016_KY_LEX | 27 | MI14R0233          | 21.4 | 9.6  | 18.7 |
| 2016 | NUS | 2016_KY_LEX | 28 | MI14R0082          | 15.0 | 3.3  | 7.5  |
| 2016 | NUS | 2016_KY_LEX | 29 | MI14W0217          | 14.7 | 4.3  | 20.8 |
| 2016 | NUS | 2016_KY_LEX | 30 | MI14R0080          | 15.4 | 7.1  | 15.7 |
| 2016 | NUS | 2016_KY_LEX | 31 | MI14R0109          | 18.1 | 6.3  | 22.0 |
| 2016 | NUS | 2016_KY_LEX | 32 | 0762A1-2-8         | 12.0 | 5.8  | 6.5  |
| 2016 | NUS | 2016_KY_LEX | 33 | 05247A1-7-3-108-2  | 16.2 | 5.2  | 16.1 |
| 2016 | NUS | 2016_KY_LEX | 34 | 0566A1-3-1-52      | 17.8 | 7.6  | 10.6 |
| 2016 | NUS | 2016_KY_LEX | 35 | 05247A1-7-3-120    | 16.8 | 4.3  | 13.3 |
| 2016 | NUS | 2016_KY_LEX | 36 | 04620A1-1-7-4-17   | 16.2 | 4.4  | 14.4 |
| 2016 | NUS | 2016_KY_LEX | 37 | ES14-0937          | 15.7 | 3.2  | 7.3  |
| 2016 | NUS | 2016_KY_LEX | 38 | ES14-1398          | 18.5 | 5.3  | 9.5  |
| 2016 | NUS | 2016_KY_LEX | 39 | ES14-1860          | 14.9 | 2.5  | 5.7  |
| 2016 | NUS | 2016_KY_LEX | 40 | ES14-1847          | 28.3 | 12.2 | 21.3 |
| 2016 | NUS | 2016_KY_LEX | 41 | IL10-21934         | 17.4 | 4.5  | 9.9  |
| 2016 | NUS | 2016_KY_LEX | 42 | IL10-21937         | 18.9 | 5.0  | 13.7 |
| 2016 | NUS | 2016_KY_LEX | 43 | IL11-6543          | 14.6 | 3.2  | 7.7  |
| 2016 | NUS | 2016_KY_LEX | 44 | IL11-28222         | 11.3 | 2.1  | 5.6  |

|      |     |             |    |                    |      |      |      |
|------|-----|-------------|----|--------------------|------|------|------|
| 2016 | NUS | 2016_KY_LEX | 45 | IL12-5110          | 12.9 | 2.6  | 9.9  |
| 2016 | NUS | 2016_KY_LEX | 46 | NE13625            | 17.8 | 5.9  | 16.3 |
| 2016 | NUS | 2016_KY_LEX | 47 | NE13515            | 31.0 | 16.1 | 40.8 |
| 2016 | NUS | 2016_KY_LEX | 48 | NE05548            | 30.7 | 18.9 | 32.1 |
| 2016 | NUS | 2016_KY_LEX | 49 | NE13604            | 19.6 | 10.3 | 33.7 |
| 2016 | NUS | 2016_KY_LEX | 50 | NI12702W           | 20.0 | 8.6  | 21.1 |
| 2016 | NUS | 2016_MI_ELA | 1  | TRUMAN             | 28.8 | NA   | NA   |
| 2016 | NUS | 2016_MI_ELA | 2  | FREEDOM            | 29.1 | NA   | NA   |
| 2016 | NUS | 2016_MI_ELA | 3  | ERNIE              | 16.9 | NA   | NA   |
| 2016 | NUS | 2016_MI_ELA | 4  | PIONEER2545        | 60.5 | NA   | NA   |
| 2016 | NUS | 2016_MI_ELA | 5  | OH10-219-65        | 37.1 | NA   | NA   |
| 2016 | NUS | 2016_MI_ELA | 6  | OH09-207-68        | 44.3 | NA   | NA   |
| 2016 | NUS | 2016_MI_ELA | 7  | OH08-206-69        | 13.2 | NA   | NA   |
| 2016 | NUS | 2016_MI_ELA | 8  | OH11-118-18        | 30.1 | NA   | NA   |
| 2016 | NUS | 2016_MI_ELA | 9  | KWS060             | 32.2 | NA   | NA   |
| 2016 | NUS | 2016_MI_ELA | 10 | KWS072             | 58.7 | NA   | NA   |
| 2016 | NUS | 2016_MI_ELA | 11 | KWS074             | 47.2 | NA   | NA   |
| 2016 | NUS | 2016_MI_ELA | 12 | KWS078             | 45.0 | NA   | NA   |
| 2016 | NUS | 2016_MI_ELA | 13 | KY09C-0052-26-12-3 | 51.8 | NA   | NA   |
| 2016 | NUS | 2016_MI_ELA | 14 | X08C-1070-73-18-1  | 54.6 | NA   | NA   |
| 2016 | NUS | 2016_MI_ELA | 15 | X09-0187-112-14-1  | 14.0 | NA   | NA   |
| 2016 | NUS | 2016_MI_ELA | 16 | KY09C-1024-96-1-3  | 43.3 | NA   | NA   |
| 2016 | NUS | 2016_MI_ELA | 17 | KY09C-0601-39-8-1  | 37.9 | NA   | NA   |
| 2016 | NUS | 2016_MI_ELA | 18 | NY05158-833        | 47.5 | NA   | NA   |
| 2016 | NUS | 2016_MI_ELA | 19 | NY05158-864        | 71.5 | NA   | NA   |
| 2016 | NUS | 2016_MI_ELA | 20 | NY05158-841        | 55.7 | NA   | NA   |
| 2016 | NUS | 2016_MI_ELA | 21 | NY05158-859        | 52.7 | NA   | NA   |
| 2016 | NUS | 2016_MI_ELA | 22 | NY99069-352        | 17.8 | NA   | NA   |
| 2016 | NUS | 2016_MI_ELA | 23 | VA14W-6            | 46.8 | NA   | NA   |
| 2016 | NUS | 2016_MI_ELA | 24 | VA10W-21BSR124     | 43.9 | NA   | NA   |
| 2016 | NUS | 2016_MI_ELA | 25 | VA14FHB-22         | 36.2 | NA   | NA   |
| 2016 | NUS | 2016_MI_ELA | 26 | VA14FHB-31         | 60.4 | NA   | NA   |
| 2016 | NUS | 2016_MI_ELA | 27 | MI14R0233          | 50.2 | NA   | NA   |
| 2016 | NUS | 2016_MI_ELA | 28 | MI14R0082          | 41.3 | NA   | NA   |
| 2016 | NUS | 2016_MI_ELA | 29 | MI14W0217          | 46.7 | NA   | NA   |
| 2016 | NUS | 2016_MI_ELA | 30 | MI14R0080          | 50.9 | NA   | NA   |
| 2016 | NUS | 2016_MI_ELA | 31 | MI14R0109          | 43.2 | NA   | NA   |
| 2016 | NUS | 2016_MI_ELA | 32 | 0762A1-2-8         | 20.2 | NA   | NA   |
| 2016 | NUS | 2016_MI_ELA | 33 | 05247A1-7-3-108-2  | 26.6 | NA   | NA   |
| 2016 | NUS | 2016_MI_ELA | 34 | 0566A1-3-1-52      | 27.9 | NA   | NA   |
| 2016 | NUS | 2016_MI_ELA | 35 | 05247A1-7-3-120    | 41.7 | NA   | NA   |
| 2016 | NUS | 2016_MI_ELA | 36 | 04620A1-1-7-4-17   | 9.8  | NA   | NA   |
| 2016 | NUS | 2016_MI_ELA | 37 | ES14-0937          | 30.7 | NA   | NA   |
| 2016 | NUS | 2016_MI_ELA | 38 | ES14-1398          | 43.8 | NA   | NA   |
| 2016 | NUS | 2016_MI_ELA | 39 | ES14-1860          | 40.9 | NA   | NA   |
| 2016 | NUS | 2016_MI_ELA | 40 | ES14-1847          | 43.6 | NA   | NA   |
| 2016 | NUS | 2016_MI_ELA | 41 | IL10-21934         | 20.2 | NA   | NA   |
| 2016 | NUS | 2016_MI_ELA | 42 | IL10-21937         | 50.5 | NA   | NA   |
| 2016 | NUS | 2016_MI_ELA | 43 | IL11-6543          | 29.7 | NA   | NA   |

|      |     |             |    |                    |      |      |    |
|------|-----|-------------|----|--------------------|------|------|----|
| 2016 | NUS | 2016_MI_ELA | 44 | IL11-28222         | 31.2 | NA   | NA |
| 2016 | NUS | 2016_MI_ELA | 45 | IL12-5110          | 30.2 | NA   | NA |
| 2016 | NUS | 2016_MI_ELA | 46 | NE13625            | 26.2 | NA   | NA |
| 2016 | NUS | 2016_MI_ELA | 47 | NE13515            | 30.8 | NA   | NA |
| 2016 | NUS | 2016_MI_ELA | 48 | NE05548            | 35.2 | NA   | NA |
| 2016 | NUS | 2016_MI_ELA | 49 | NE13604            | 25.2 | NA   | NA |
| 2016 | NUS | 2016_MI_ELA | 50 | NI12702W           | 20.7 | NA   | NA |
| 2016 | NUS | 2016_MO_CO  |    |                    |      |      |    |
| 2016 | NUS | L           | 1  | TRUMAN             | 11.2 | 22.5 | NA |
| 2016 | NUS | 2016_MO_CO  |    |                    |      |      |    |
| 2016 | NUS | L           | 2  | FREEDOM            | NA   | NA   | NA |
| 2016 | NUS | 2016_MO_CO  |    |                    |      |      |    |
| 2016 | NUS | L           | 3  | ERNIE              | 25.2 | 30.0 | NA |
| 2016 | NUS | 2016_MO_CO  |    |                    |      |      |    |
| 2016 | NUS | L           | 4  | PIONEER2545        | 29.2 | 37.5 | NA |
| 2016 | NUS | 2016_MO_CO  |    |                    |      |      |    |
| 2016 | NUS | L           | 5  | OH10-219-65        | 19.9 | 60.0 | NA |
| 2016 | NUS | 2016_MO_CO  |    |                    |      |      |    |
| 2016 | NUS | L           | 6  | OH09-207-68        | 18.8 | 27.5 | NA |
| 2016 | NUS | 2016_MO_CO  |    |                    |      |      |    |
| 2016 | NUS | L           | 7  | OH08-206-69        | 16.2 | 35.0 | NA |
| 2016 | NUS | 2016_MO_CO  |    |                    |      |      |    |
| 2016 | NUS | L           | 8  | OH11-118-18        | 10.4 | 17.5 | NA |
| 2016 | NUS | 2016_MO_CO  |    |                    |      |      |    |
| 2016 | NUS | L           | 9  | KWS060             | 18.2 | 37.5 | NA |
| 2016 | NUS | 2016_MO_CO  |    |                    |      |      |    |
| 2016 | NUS | L           | 10 | KWS072             | 24.5 | 35.0 | NA |
| 2016 | NUS | 2016_MO_CO  |    |                    |      |      |    |
| 2016 | NUS | L           | 11 | KWS074             | 20.2 | 30.0 | NA |
| 2016 | NUS | 2016_MO_CO  |    |                    |      |      |    |
| 2016 | NUS | L           | 12 | KWS078             | 8.7  | 17.5 | NA |
| 2016 | NUS | 2016_MO_CO  |    |                    |      |      |    |
| 2016 | NUS | L           | 13 | KY09C-0052-26-12-3 | 11.7 | 25.0 | NA |
| 2016 | NUS | 2016_MO_CO  |    |                    |      |      |    |
| 2016 | NUS | L           | 14 | X08C-1070-73-18-1  | 14.2 | 25.0 | NA |
| 2016 | NUS | 2016_MO_CO  |    |                    |      |      |    |
| 2016 | NUS | L           | 15 | X09-0187-112-14-1  | 12.6 | 22.5 | NA |
| 2016 | NUS | 2016_MO_CO  |    |                    |      |      |    |
| 2016 | NUS | L           | 16 | KY09C-1024-96-1-3  | 19.4 | 47.5 | NA |
| 2016 | NUS | 2016_MO_CO  |    |                    |      |      |    |
| 2016 | NUS | L           | 17 | KY09C-0601-39-8-1  | 12.2 | 30.0 | NA |
| 2016 | NUS | 2016_MO_CO  |    |                    |      |      |    |
| 2016 | NUS | L           | 18 | NY05158-833        | 17.4 | 32.5 | NA |
| 2016 | NUS | 2016_MO_CO  |    |                    |      |      |    |
| 2016 | NUS | L           | 19 | NY05158-864        | 14.0 | 35.0 | NA |
| 2016 | NUS | 2016_MO_CO  |    |                    |      |      |    |
| 2016 | NUS | L           | 20 | NY05158-841        | 12.6 | 22.5 | NA |
| 2016 | NUS | 2016_MO_CO  |    |                    |      |      |    |
| 2016 | NUS | L           | 21 | NY05158-859        | 23.5 | 50.0 | NA |
| 2016 | NUS | 2016_MO_CO  |    |                    |      |      |    |
| 2016 | NUS | L           | 22 | NY99069-352        | 24.1 | 60.0 | NA |
| 2016 | NUS | 2016_MO_CO  |    |                    |      |      |    |
| 2016 | NUS | L           | 23 | VA14W-6            | 15.3 | 52.5 | NA |
| 2016 | NUS | 2016_MO_CO  |    |                    |      |      |    |
| 2016 | NUS | L           | 24 | VA10W-21BSR124     | 27.5 | 57.5 | NA |

|      |     |                 |    |                   |      |      |    |
|------|-----|-----------------|----|-------------------|------|------|----|
| 2016 | NUS | 2016_MO_CO<br>L | 25 | VA14FHB-22        | 22.8 | 40.0 | NA |
| 2016 | NUS | 2016_MO_CO<br>L | 26 | VA14FHB-31        | 15.1 | 22.5 | NA |
| 2016 | NUS | 2016_MO_CO<br>L | 27 | MI14R0233         | 11.0 | 32.5 | NA |
| 2016 | NUS | 2016_MO_CO<br>L | 28 | MI14R0082         | 10.4 | 30.0 | NA |
| 2016 | NUS | 2016_MO_CO<br>L | 29 | MI14W0217         | 11.0 | 12.5 | NA |
| 2016 | NUS | 2016_MO_CO<br>L | 30 | MI14R0080         | 16.5 | 45.0 | NA |
| 2016 | NUS | 2016_MO_CO<br>L | 31 | MI14R0109         | 12.6 | 37.5 | NA |
| 2016 | NUS | 2016_MO_CO<br>L | 32 | 0762A1-2-8        | 10.1 | 20.0 | NA |
| 2016 | NUS | 2016_MO_CO<br>L | 33 | 05247A1-7-3-108-2 | 7.9  | 15.0 | NA |
| 2016 | NUS | 2016_MO_CO<br>L | 34 | 0566A1-3-1-52     | 7.8  | 15.0 | NA |
| 2016 | NUS | 2016_MO_CO<br>L | 35 | 05247A1-7-3-120   | 9.2  | 20.0 | NA |
| 2016 | NUS | 2016_MO_CO<br>L | 36 | 04620A1-1-7-4-17  | 10.5 | 17.5 | NA |
| 2016 | NUS | 2016_MO_CO<br>L | 37 | ES14-0937         | 17.2 | 25.0 | NA |
| 2016 | NUS | 2016_MO_CO<br>L | 38 | ES14-1398         | 19.0 | 45.0 | NA |
| 2016 | NUS | 2016_MO_CO<br>L | 39 | ES14-1860         | 15.3 | 37.5 | NA |
| 2016 | NUS | 2016_MO_CO<br>L | 40 | ES14-1847         | 14.5 | 35.0 | NA |
| 2016 | NUS | 2016_MO_CO<br>L | 41 | IL10-21934        | 11.0 | 15.0 | NA |
| 2016 | NUS | 2016_MO_CO<br>L | 42 | IL10-21937        | 8.0  | 17.5 | NA |
| 2016 | NUS | 2016_MO_CO<br>L | 43 | IL11-6543         | 8.4  | 7.5  | NA |
| 2016 | NUS | 2016_MO_CO<br>L | 44 | IL11-28222        | 21.0 | 22.5 | NA |
| 2016 | NUS | 2016_MO_CO<br>L | 45 | IL12-5110         | 12.5 | 37.5 | NA |
| 2016 | NUS | 2016_MO_CO<br>L | 46 | NE13625           | 13.2 | 15.0 | NA |
| 2016 | NUS | 2016_MO_CO<br>L | 47 | NE13515           | 16.5 | 35.0 | NA |
| 2016 | NUS | 2016_MO_CO<br>L | 48 | NE05548           | 18.8 | 60.0 | NA |
| 2016 | NUS | 2016_MO_CO<br>L | 49 | NE13604           | 21.2 | 25.0 | NA |
| 2016 | NUS | 2016_MO_CO<br>L | 50 | NI12702W          | 26.1 | 45.0 | NA |
| 2016 | NUS | 2016_NE_MEA     | 1  | TRUMAN            | 11.3 | 22.0 | NA |
| 2016 | NUS | 2016_NE_MEA     | 2  | FREEDOM           | 15.7 | 24.0 | NA |
| 2016 | NUS | 2016_NE_MEA     | 3  | ERNIE             | 19.7 | 12.0 | NA |



|      |     |             |    |                    |      |      |    |
|------|-----|-------------|----|--------------------|------|------|----|
| 2016 | NUS | 2016_NE_MEA | 4  | PIONEER2545        | 27.0 | 28.0 | NA |
| 2016 | NUS | 2016_NE_MEA | 5  | OH10-219-65        | 15.0 | 13.0 | NA |
| 2016 | NUS | 2016_NE_MEA | 6  | OH09-207-68        | 10.7 | 12.0 | NA |
| 2016 | NUS | 2016_NE_MEA | 7  | OH08-206-69        | 13.0 | 16.0 | NA |
| 2016 | NUS | 2016_NE_MEA | 8  | OH11-118-18        | 9.0  | 25.0 | NA |
| 2016 | NUS | 2016_NE_MEA | 9  | KWS060             | 12.0 | 15.0 | NA |
| 2016 | NUS | 2016_NE_MEA | 10 | KWS072             | 26.7 | 14.0 | NA |
| 2016 | NUS | 2016_NE_MEA | 11 | KWS074             | 18.3 | 15.0 | NA |
| 2016 | NUS | 2016_NE_MEA | 12 | KWS078             | 14.0 | 7.0  | NA |
| 2016 | NUS | 2016_NE_MEA | 13 | KY09C-0052-26-12-3 | 19.7 | 19.0 | NA |
| 2016 | NUS | 2016_NE_MEA | 14 | X08C-1070-73-18-1  | 16.0 | 14.0 | NA |
| 2016 | NUS | 2016_NE_MEA | 15 | X09-0187-112-14-1  | 27.3 | 24.0 | NA |
| 2016 | NUS | 2016_NE_MEA | 16 | KY09C-1024-96-1-3  | 17.0 | 10.0 | NA |
| 2016 | NUS | 2016_NE_MEA | 17 | KY09C-0601-39-8-1  | 15.7 | 5.0  | NA |
| 2016 | NUS | 2016_NE_MEA | 18 | NY05158-833        | 18.0 | 6.0  | NA |
| 2016 | NUS | 2016_NE_MEA | 19 | NY05158-864        | 21.7 | 8.0  | NA |
| 2016 | NUS | 2016_NE_MEA | 20 | NY05158-841        | 29.3 | 11.0 | NA |
| 2016 | NUS | 2016_NE_MEA | 21 | NY05158-859        | 31.7 | 12.0 | NA |
| 2016 | NUS | 2016_NE_MEA | 22 | NY99069-352        | 20.0 | 11.0 | NA |
| 2016 | NUS | 2016_NE_MEA | 23 | VA14W-6            | 25.7 | 12.0 | NA |
| 2016 | NUS | 2016_NE_MEA | 24 | VA10W-21BSR124     | 24.3 | 18.0 | NA |
| 2016 | NUS | 2016_NE_MEA | 25 | VA14FHB-22         | 17.3 | 14.0 | NA |
| 2016 | NUS | 2016_NE_MEA | 26 | VA14FHB-31         | 14.7 | 28.0 | NA |
| 2016 | NUS | 2016_NE_MEA | 27 | MI14R0233          | 18.7 | 22.0 | NA |
| 2016 | NUS | 2016_NE_MEA | 28 | MI14R0082          | 14.7 | 29.0 | NA |
| 2016 | NUS | 2016_NE_MEA | 29 | MI14W0217          | 11.3 | 12.0 | NA |
| 2016 | NUS | 2016_NE_MEA | 30 | MI14R0080          | 17.0 | 19.0 | NA |
| 2016 | NUS | 2016_NE_MEA | 31 | MI14R0109          | 16.7 | 17.0 | NA |
| 2016 | NUS | 2016_NE_MEA | 32 | 0762A1-2-8         | 17.3 | 25.0 | NA |
| 2016 | NUS | 2016_NE_MEA | 33 | 05247A1-7-3-108-2  | 14.3 | 20.0 | NA |
| 2016 | NUS | 2016_NE_MEA | 34 | 0566A1-3-1-52      | 15.3 | 19.0 | NA |
| 2016 | NUS | 2016_NE_MEA | 35 | 05247A1-7-3-120    | 23.3 | 21.0 | NA |
| 2016 | NUS | 2016_NE_MEA | 36 | 04620A1-1-7-4-17   | 22.0 | 21.0 | NA |
| 2016 | NUS | 2016_NE_MEA | 37 | ES14-0937          | 15.0 | 40.0 | NA |
| 2016 | NUS | 2016_NE_MEA | 38 | ES14-1398          | 14.0 | 18.0 | NA |
| 2016 | NUS | 2016_NE_MEA | 39 | ES14-1860          | 19.7 | 26.0 | NA |
| 2016 | NUS | 2016_NE_MEA | 40 | ES14-1847          | 22.4 | 23.0 | NA |
| 2016 | NUS | 2016_NE_MEA | 41 | IL10-21934         | 22.7 | 18.0 | NA |
| 2016 | NUS | 2016_NE_MEA | 42 | IL10-21937         | 13.7 | 10.0 | NA |
| 2016 | NUS | 2016_NE_MEA | 43 | IL11-6543          | 18.3 | 19.0 | NA |
| 2016 | NUS | 2016_NE_MEA | 44 | IL11-28222         | 20.3 | 31.0 | NA |
| 2016 | NUS | 2016_NE_MEA | 45 | IL12-5110          | 20.3 | 26.0 | NA |
| 2016 | NUS | 2016_NE_MEA | 46 | NE13625            | 8.7  | 8.0  | NA |
| 2016 | NUS | 2016_NE_MEA | 47 | NE13515            | 18.0 | 8.0  | NA |
| 2016 | NUS | 2016_NE_MEA | 48 | NE05548            | 16.0 | 18.0 | NA |
| 2016 | NUS | 2016_NE_MEA | 49 | NE13604            | 15.0 | 10.0 | NA |
| 2016 | NUS | 2016_NE_MEA | 50 | NI12702W           | 14.0 | 2.0  | NA |
| 2016 | NUS | 2016_NY_ITH | 1  | TRUMAN             | NA   | 10.0 | NA |
| 2016 | NUS | 2016_NY_ITH | 2  | FREEDOM            | NA   | 25.0 | NA |

|      |     |                 |    |                    |    |      |      |
|------|-----|-----------------|----|--------------------|----|------|------|
| 2016 | NUS | 2016_NY_ITH     | 3  | ERNIE              | NA | 15.0 | NA   |
| 2016 | NUS | 2016_NY_ITH     | 4  | PIONEER2545        | NA | 60.0 | NA   |
| 2016 | NUS | 2016_NY_ITH     | 5  | OH10-219-65        | NA | 10.0 | NA   |
| 2016 | NUS | 2016_NY_ITH     | 6  | OH09-207-68        | NA | 20.0 | NA   |
| 2016 | NUS | 2016_NY_ITH     | 7  | OH08-206-69        | NA | 25.0 | NA   |
| 2016 | NUS | 2016_NY_ITH     | 8  | OH11-118-18        | NA | 25.0 | NA   |
| 2016 | NUS | 2016_NY_ITH     | 9  | KWS060             | NA | 25.0 | NA   |
| 2016 | NUS | 2016_NY_ITH     | 10 | KWS072             | NA | 15.0 | NA   |
| 2016 | NUS | 2016_NY_ITH     | 11 | KWS074             | NA | 25.0 | NA   |
| 2016 | NUS | 2016_NY_ITH     | 12 | KWS078             | NA | 10.0 | NA   |
| 2016 | NUS | 2016_NY_ITH     | 13 | KY09C-0052-26-12-3 | NA | 10.0 | NA   |
| 2016 | NUS | 2016_NY_ITH     | 14 | X08C-1070-73-18-1  | NA | 20.0 | NA   |
| 2016 | NUS | 2016_NY_ITH     | 15 | X09-0187-112-14-1  | NA | 25.0 | NA   |
| 2016 | NUS | 2016_NY_ITH     | 16 | KY09C-1024-96-1-3  | NA | 10.0 | NA   |
| 2016 | NUS | 2016_NY_ITH     | 17 | KY09C-0601-39-8-1  | NA | 15.0 | NA   |
| 2016 | NUS | 2016_NY_ITH     | 18 | NY05158-833        | NA | 5.0  | NA   |
| 2016 | NUS | 2016_NY_ITH     | 19 | NY05158-864        | NA | 10.0 | NA   |
| 2016 | NUS | 2016_NY_ITH     | 20 | NY05158-841        | NA | 5.0  | NA   |
| 2016 | NUS | 2016_NY_ITH     | 21 | NY05158-859        | NA | 10.0 | NA   |
| 2016 | NUS | 2016_NY_ITH     | 22 | NY99069-352        | NA | 30.0 | NA   |
| 2016 | NUS | 2016_NY_ITH     | 23 | VA14W-6            | NA | 40.0 | NA   |
| 2016 | NUS | 2016_NY_ITH     | 24 | VA10W-21BSR124     | NA | 50.0 | NA   |
| 2016 | NUS | 2016_NY_ITH     | 25 | VA14FHB-22         | NA | 25.0 | NA   |
| 2016 | NUS | 2016_NY_ITH     | 26 | VA14FHB-31         | NA | 45.0 | NA   |
| 2016 | NUS | 2016_NY_ITH     | 27 | MI14R0233          | NA | 15.0 | NA   |
| 2016 | NUS | 2016_NY_ITH     | 28 | MI14R0082          | NA | 50.0 | NA   |
| 2016 | NUS | 2016_NY_ITH     | 29 | MI14W0217          | NA | 10.0 | NA   |
| 2016 | NUS | 2016_NY_ITH     | 30 | MI14R0080          | NA | 10.0 | NA   |
| 2016 | NUS | 2016_NY_ITH     | 31 | MI14R0109          | NA | 10.0 | NA   |
| 2016 | NUS | 2016_NY_ITH     | 32 | 0762A1-2-8         | NA | 45.0 | NA   |
| 2016 | NUS | 2016_NY_ITH     | 33 | 05247A1-7-3-108-2  | NA | 50.0 | NA   |
| 2016 | NUS | 2016_NY_ITH     | 34 | 0566A1-3-1-52      | NA | 55.0 | NA   |
| 2016 | NUS | 2016_NY_ITH     | 35 | 05247A1-7-3-120    | NA | 40.0 | NA   |
| 2016 | NUS | 2016_NY_ITH     | 36 | 04620A1-1-7-4-17   | NA | 25.0 | NA   |
| 2016 | NUS | 2016_NY_ITH     | 37 | ES14-0937          | NA | 15.0 | NA   |
| 2016 | NUS | 2016_NY_ITH     | 38 | ES14-1398          | NA | 25.0 | NA   |
| 2016 | NUS | 2016_NY_ITH     | 39 | ES14-1860          | NA | 10.0 | NA   |
| 2016 | NUS | 2016_NY_ITH     | 40 | ES14-1847          | NA | 65.0 | NA   |
| 2016 | NUS | 2016_NY_ITH     | 41 | IL10-21934         | NA | 5.0  | NA   |
| 2016 | NUS | 2016_NY_ITH     | 42 | IL10-21937         | NA | 5.0  | NA   |
| 2016 | NUS | 2016_NY_ITH     | 43 | IL11-6543          | NA | 5.0  | NA   |
| 2016 | NUS | 2016_NY_ITH     | 44 | IL11-28222         | NA | 0.0  | NA   |
| 2016 | NUS | 2016_NY_ITH     | 45 | IL12-5110          | NA | 5.0  | NA   |
| 2016 | NUS | 2016_NY_ITH     | 46 | NE13625            | NA | 5.0  | NA   |
| 2016 | NUS | 2016_NY_ITH     | 47 | NE13515            | NA | 10.0 | NA   |
| 2016 | NUS | 2016_NY_ITH     | 48 | NE05548            | NA | 10.0 | NA   |
| 2016 | NUS | 2016_NY_ITH     | 49 | NE13604            | NA | 20.0 | NA   |
| 2016 | NUS | 2016_NY_ITH     | 50 | NI12702W           | NA | 10.0 | NA   |
| 2016 | NUS | 2016_OH_WO<br>O | 1  | TRUMAN             | NA | 15.0 | 11.9 |

|      |     |                 |    |                    |    |      |      |
|------|-----|-----------------|----|--------------------|----|------|------|
| 2016 | NUS | 2016_OH_WO<br>O | 2  | FREEDOM            | NA | 40.0 | 12.8 |
| 2016 | NUS | 2016_OH_WO<br>O | 3  | ERNIE              | NA | 28.0 | 32.1 |
| 2016 | NUS | 2016_OH_WO<br>O | 4  | PIONEER2545        | NA | 58.0 | 53.7 |
| 2016 | NUS | 2016_OH_WO<br>O | 5  | OH10-219-65        | NA | 50.0 | 28.6 |
| 2016 | NUS | 2016_OH_WO<br>O | 6  | OH09-207-68        | NA | 20.0 | 11.7 |
| 2016 | NUS | 2016_OH_WO<br>O | 7  | OH08-206-69        | NA | 30.0 | 25.2 |
| 2016 | NUS | 2016_OH_WO<br>O | 8  | OH11-118-18        | NA | 8.0  | 6.5  |
| 2016 | NUS | 2016_OH_WO<br>O | 9  | KWS060             | NA | 55.0 | 39.3 |
| 2016 | NUS | 2016_OH_WO<br>O | 10 | KWS072             | NA | 20.0 | 10.2 |
| 2016 | NUS | 2016_OH_WO<br>O | 11 | KWS074             | NA | 25.0 | 16.6 |
| 2016 | NUS | 2016_OH_WO<br>O | 12 | KWS078             | NA | 18.0 | 21.1 |
| 2016 | NUS | 2016_OH_WO<br>O | 13 | KY09C-0052-26-12-3 | NA | 8.0  | 10.1 |
| 2016 | NUS | 2016_OH_WO<br>O | 14 | X08C-1070-73-18-1  | NA | 25.0 | 33.0 |
| 2016 | NUS | 2016_OH_WO<br>O | 15 | X09-0187-112-14-1  | NA | 25.0 | 28.9 |
| 2016 | NUS | 2016_OH_WO<br>O | 16 | KY09C-1024-96-1-3  | NA | 10.0 | 15.4 |
| 2016 | NUS | 2016_OH_WO<br>O | 17 | KY09C-0601-39-8-1  | NA | 8.0  | 14.8 |
| 2016 | NUS | 2016_OH_WO<br>O | 18 | NY05158-833        | NA | 15.0 | 20.5 |
| 2016 | NUS | 2016_OH_WO<br>O | 19 | NY05158-864        | NA | 10.0 | 27.0 |
| 2016 | NUS | 2016_OH_WO<br>O | 20 | NY05158-841        | NA | 15.0 | 16.6 |
| 2016 | NUS | 2016_OH_WO<br>O | 21 | NY05158-859        | NA | 10.0 | 15.0 |
| 2016 | NUS | 2016_OH_WO<br>O | 22 | NY99069-352        | NA | 28.0 | 33.6 |
| 2016 | NUS | 2016_OH_WO<br>O | 23 | VA14W-6            | NA | 55.0 | 24.6 |
| 2016 | NUS | 2016_OH_WO<br>O | 24 | VA10W-21BSR124     | NA | 70.0 | 20.9 |
| 2016 | NUS | 2016_OH_WO<br>O | 25 | VA14FHB-22         | NA | 50.0 | 28.2 |
| 2016 | NUS | 2016_OH_WO<br>O | 26 | VA14FHB-31         | NA | 15.0 | 8.7  |
| 2016 | NUS | 2016_OH_WO<br>O | 27 | MI14R0233          | NA | 18.0 | 19.3 |
| 2016 | NUS | 2016_OH_WO<br>O | 28 | MI14R0082          | NA | 5.0  | 8.0  |
| 2016 | NUS | 2016_OH_WO<br>O | 29 | MI14W0217          | NA | 20.0 | 24.1 |

|      |     |                 |    |                   |      |      |      |
|------|-----|-----------------|----|-------------------|------|------|------|
| 2016 | NUS | 2016_OH_WO<br>O | 30 | MI14R0080         | NA   | 20.0 | 13.5 |
| 2016 | NUS | 2016_OH_WO<br>O | 31 | MI14R0109         | NA   | 18.0 | 9.7  |
| 2016 | NUS | 2016_OH_WO<br>O | 32 | 0762A1-2-8        | NA   | 15.0 | 9.7  |
| 2016 | NUS | 2016_OH_WO<br>O | 33 | 05247A1-7-3-108-2 | NA   | 20.0 | 21.6 |
| 2016 | NUS | 2016_OH_WO<br>O | 34 | 0566A1-3-1-52     | NA   | 18.0 | 11.6 |
| 2016 | NUS | 2016_OH_WO<br>O | 35 | 05247A1-7-3-120   | NA   | 15.0 | 23.5 |
| 2016 | NUS | 2016_OH_WO<br>O | 36 | 04620A1-1-7-4-17  | NA   | 30.0 | 26.1 |
| 2016 | NUS | 2016_OH_WO<br>O | 37 | ES14-0937         | NA   | 15.0 | 16.1 |
| 2016 | NUS | 2016_OH_WO<br>O | 38 | ES14-1398         | NA   | 25.0 | 15.0 |
| 2016 | NUS | 2016_OH_WO<br>O | 39 | ES14-1860         | NA   | 15.0 | 9.5  |
| 2016 | NUS | 2016_OH_WO<br>O | 40 | ES14-1847         | NA   | 70.0 | 43.2 |
| 2016 | NUS | 2016_OH_WO<br>O | 41 | IL10-21934        | NA   | 15.0 | 13.4 |
| 2016 | NUS | 2016_OH_WO<br>O | 42 | IL10-21937        | NA   | 25.0 | 17.3 |
| 2016 | NUS | 2016_OH_WO<br>O | 43 | IL11-6543         | NA   | 5.0  | 6.1  |
| 2016 | NUS | 2016_OH_WO<br>O | 44 | IL11-28222        | NA   | 8.0  | 8.3  |
| 2016 | NUS | 2016_OH_WO<br>O | 45 | IL12-5110         | NA   | 8.0  | 12.1 |
| 2016 | NUS | 2016_OH_WO<br>O | 46 | NE13625           | NA   | 40.0 | 27.5 |
| 2016 | NUS | 2016_OH_WO<br>O | 47 | NE13515           | NA   | 35.0 | 28.8 |
| 2016 | NUS | 2016_OH_WO<br>O | 48 | NE05548           | NA   | 50.0 | 44.5 |
| 2016 | NUS | 2016_OH_WO<br>O | 49 | NE13604           | NA   | 40.0 | 25.7 |
| 2016 | NUS | 2016_OH_WO<br>O | 50 | NI12702W          | NA   | 65.0 | NA   |
| 2016 | NUS | 2016_VA_BLA     | 1  | TRUMAN            | 7.7  | 22.5 | 4.8  |
| 2016 | NUS | 2016_VA_BLA     | 2  | FREEDOM           | 14.3 | 40.5 | 9.5  |
| 2016 | NUS | 2016_VA_BLA     | 3  | ERNIE             | 13.5 | 46.0 | 6.0  |
| 2016 | NUS | 2016_VA_BLA     | 4  | PIONEER2545       | 40.4 | 52.0 | 13.0 |
| 2016 | NUS | 2016_VA_BLA     | 5  | OH10-219-65       | 15.8 | 31.0 | 4.8  |
| 2016 | NUS | 2016_VA_BLA     | 6  | OH09-207-68       | 10.4 | 47.0 | 4.8  |
| 2016 | NUS | 2016_VA_BLA     | 7  | OH08-206-69       | 11.3 | 37.0 | 6.8  |
| 2016 | NUS | 2016_VA_BLA     | 8  | OH11-118-18       | 9.8  | 21.5 | 4.9  |
| 2016 | NUS | 2016_VA_BLA     | 9  | KWS060            | 30.8 | 51.5 | 3.0  |
| 2016 | NUS | 2016_VA_BLA     | 10 | KWS072            | 10.2 | 48.2 | 2.7  |
| 2016 | NUS | 2016_VA_BLA     | 11 | KWS074            | 14.7 | 31.0 | 7.8  |
| 2016 | NUS | 2016_VA_BLA     | 12 | KWS078            | 14.3 | 23.5 | 4.0  |

|      |     |             |    |                    |      |      |      |
|------|-----|-------------|----|--------------------|------|------|------|
| 2016 | NUS | 2016_VA_BLA | 13 | KY09C-0052-26-12-3 | 7.6  | 34.1 | 1.2  |
| 2016 | NUS | 2016_VA_BLA | 14 | X08C-1070-73-18-1  | 9.1  | 23.0 | 3.3  |
| 2016 | NUS | 2016_VA_BLA | 15 | X09-0187-112-14-1  | 14.1 | 38.5 | 5.6  |
| 2016 | NUS | 2016_VA_BLA | 16 | KY09C-1024-96-1-3  | 10.5 | 27.0 | 5.0  |
| 2016 | NUS | 2016_VA_BLA | 17 | KY09C-0601-39-8-1  | 12.4 | 15.3 | 4.0  |
| 2016 | NUS | 2016_VA_BLA | 18 | NY05158-833        | 12.8 | 50.0 | 5.6  |
| 2016 | NUS | 2016_VA_BLA | 19 | NY05158-864        | 18.7 | 31.3 | 8.4  |
| 2016 | NUS | 2016_VA_BLA | 20 | NY05158-841        | 16.4 | 42.0 | 3.0  |
| 2016 | NUS | 2016_VA_BLA | 21 | NY05158-859        | 14.6 | 47.5 | 7.6  |
| 2016 | NUS | 2016_VA_BLA | 22 | NY99069-352        | 22.4 | 54.5 | 6.9  |
| 2016 | NUS | 2016_VA_BLA | 23 | VA14W-6            | 21.4 | 44.0 | 8.6  |
| 2016 | NUS | 2016_VA_BLA | 24 | VA10W-21BSR124     | 25.4 | 41.0 | 4.1  |
| 2016 | NUS | 2016_VA_BLA | 25 | VA14FHB-22         | 16.2 | 34.0 | 6.6  |
| 2016 | NUS | 2016_VA_BLA | 26 | VA14FHB-31         | 22.3 | 52.0 | 7.1  |
| 2016 | NUS | 2016_VA_BLA | 27 | MI14R0233          | 16.5 | 39.0 | 8.6  |
| 2016 | NUS | 2016_VA_BLA | 28 | MI14R0082          | 7.0  | 19.0 | 2.9  |
| 2016 | NUS | 2016_VA_BLA | 29 | MI14W0217          | 7.7  | 34.4 | 5.2  |
| 2016 | NUS | 2016_VA_BLA | 30 | MI14R0080          | 14.5 | 28.8 | 2.8  |
| 2016 | NUS | 2016_VA_BLA | 31 | MI14R0109          | 13.2 | 32.0 | 3.3  |
| 2016 | NUS | 2016_VA_BLA | 32 | 0762A1-2-8         | 8.8  | 46.0 | 3.4  |
| 2016 | NUS | 2016_VA_BLA | 33 | 05247A1-7-3-108-2  | 10.7 | 45.4 | 10.8 |
| 2016 | NUS | 2016_VA_BLA | 34 | 0566A1-3-1-52      | 11.3 | 75.6 | 5.3  |
| 2016 | NUS | 2016_VA_BLA | 35 | 05247A1-7-3-120    | 14.4 | 41.0 | 7.3  |
| 2016 | NUS | 2016_VA_BLA | 36 | 04620A1-1-7-4-17   | 13.8 | 38.6 | 6.0  |
| 2016 | NUS | 2016_VA_BLA | 37 | ES14-0937          | 10.3 | 34.0 | 4.6  |
| 2016 | NUS | 2016_VA_BLA | 38 | ES14-1398          | 17.2 | 41.0 | 3.3  |
| 2016 | NUS | 2016_VA_BLA | 39 | ES14-1860          | 10.4 | 24.3 | 1.4  |
| 2016 | NUS | 2016_VA_BLA | 40 | ES14-1847          | 34.2 | 65.5 | 12.7 |
| 2016 | NUS | 2016_VA_BLA | 41 | IL10-21934         | 8.4  | 31.4 | 3.3  |
| 2016 | NUS | 2016_VA_BLA | 42 | IL10-21937         | 12.9 | 31.5 | 4.4  |
| 2016 | NUS | 2016_VA_BLA | 43 | IL11-6543          | 8.8  | 19.5 | 2.0  |
| 2016 | NUS | 2016_VA_BLA | 44 | IL11-28222         | 7.0  | 18.5 | 1.7  |
| 2016 | NUS | 2016_VA_BLA | 45 | IL12-5110          | 11.7 | 25.5 | 3.3  |
| 2016 | NUS | 2016_VA_BLA | 46 | NE13625            | 12.2 | 30.0 | 6.3  |
| 2016 | NUS | 2016_VA_BLA | 47 | NE13515            | 21.1 | 53.5 | 7.7  |
| 2016 | NUS | 2016_VA_BLA | 48 | NE05548            | 19.9 | 40.1 | 8.6  |
| 2016 | NUS | 2016_VA_BLA | 49 | NE13604            | 19.6 | 50.0 | 12.6 |
| 2016 | NUS | 2016_VA_BLA | 50 | NI12702W           | 19.1 | 61.5 | 14.2 |
| 2017 | NUS | 2017_OH_WO  |    |                    |      |      |      |
| 2017 | NUS | O           | 1  | TRUMAN             | NA   | 12.0 | 7.3  |
| 2017 | NUS | 2017_OH_WO  |    |                    |      |      |      |
| 2017 | NUS | O           | 2  | ERNIE              | NA   | 24.0 | 14.4 |
| 2017 | NUS | 2017_OH_WO  |    |                    |      |      |      |
| 2017 | NUS | O           | 3  | FREEDOM            | NA   | 37.0 | 18.0 |
| 2017 | NUS | 2017_OH_WO  |    |                    |      |      |      |
| 2017 | NUS | O           | 4  | PIONEER2545        | NA   | 56.0 | 39.9 |
| 2017 | NUS | 2017_OH_WO  |    |                    |      |      |      |
| 2017 | NUS | O           | 5  | VA11W-108PA        | NA   | 16.0 | 10.7 |
| 2017 | NUS | 2017_OH_WO  |    |                    |      |      |      |
| 2017 | NUS | O           | 6  | VA09MAS1-12-5-1    | NA   | 15.0 | 13.7 |

|      |     |                 |    |                    |    |      |      |
|------|-----|-----------------|----|--------------------|----|------|------|
| 2017 | NUS | 2017_OH_WO<br>O | 7  | VA14FHB-29         | NA | 15.0 | 12.8 |
| 2017 | NUS | 2017_OH_WO<br>O | 8  | VA09MAS8-34-5-2    | NA | 16.0 | 12.3 |
| 2017 | NUS | 2017_OH_WO<br>O | 9  | VA09MAS3-34-2-1    | NA | 21.0 | 9.7  |
| 2017 | NUS | 2017_OH_WO<br>O | 10 | KY09C-0052-26-12-3 | NA | 11.0 | 2.4  |
| 2017 | NUS | 2017_OH_WO<br>O | 11 | X08C-1070-74-20-1  | NA | 10.0 | 5.3  |
| 2017 | NUS | 2017_OH_WO<br>O | 12 | KY09C-1245-100-1-3 | NA | 12.0 | 7.0  |
| 2017 | NUS | 2017_OH_WO<br>O | 13 | KY09C-0267-45-16-3 | NA | 9.0  | 5.8  |
| 2017 | NUS | 2017_OH_WO<br>O | 14 | X08C-1090-51-12-5  | NA | 12.0 | 14.3 |
| 2017 | NUS | 2017_OH_WO<br>O | 15 | OH12-195-22        | NA | 17.0 | 13.1 |
| 2017 | NUS | 2017_OH_WO<br>O | 16 | OH11-118-18        | NA | 8.0  | 4.3  |
| 2017 | NUS | 2017_OH_WO<br>O | 17 | OH12-133-74        | NA | 17.0 | 8.9  |
| 2017 | NUS | 2017_OH_WO<br>O | 18 | OH12-194-24        | NA | 17.0 | 14.8 |
| 2017 | NUS | 2017_OH_WO<br>O | 19 | OH13-16-25         | NA | 15.0 | 10.3 |
| 2017 | NUS | 2017_OH_WO<br>O | 20 | NE14538            | NA | 17.0 | 11.7 |
| 2017 | NUS | 2017_OH_WO<br>O | 21 | NE14606            | NA | 26.0 | 21.6 |
| 2017 | NUS | 2017_OH_WO<br>O | 22 | NE14696            | NA | 87.0 | 21.3 |
| 2017 | NUS | 2017_OH_WO<br>O | 23 | NI12702W           | NA | 72.0 | 31.1 |
| 2017 | NUS | 2017_OH_WO<br>O | 24 | NE15545            | NA | 73.0 | 23.3 |
| 2017 | NUS | 2017_OH_WO<br>O | 25 | KWS095             | NA | 26.0 | 7.9  |
| 2017 | NUS | 2017_OH_WO<br>O | 26 | KWS103             | NA | 34.0 | 10.1 |
| 2017 | NUS | 2017_OH_WO<br>O | 27 | KWS122             | NA | 17.0 | 6.1  |
| 2017 | NUS | 2017_OH_WO<br>O | 28 | KWS127             | NA | 47.0 | 15.9 |
| 2017 | NUS | 2017_OH_WO<br>O | 29 | KWS141             | NA | 14.0 | 3.7  |
| 2017 | NUS | 2017_OH_WO<br>O | 30 | IL09-3264-T2       | NA | 24.0 | 6.0  |
| 2017 | NUS | 2017_OH_WO<br>O | 31 | IL12-21235         | NA | 11.0 | 4.1  |
| 2017 | NUS | 2017_OH_WO<br>O | 32 | IL12-26004         | NA | 6.0  | 3.0  |
| 2017 | NUS | 2017_OH_WO<br>O | 33 | IL13-451           | NA | 18.0 | 6.5  |
| 2017 | NUS | 2017_OH_WO<br>O | 34 | IL13-20616         | NA | 11.0 | 5.1  |

|      |     |                 |    |                            |      |      |      |
|------|-----|-----------------|----|----------------------------|------|------|------|
| 2017 | NUS | 2017_OH_WO<br>O | 35 | NY99056-161                | NA   | 18.0 | 20.0 |
| 2017 | NUS | 2017_OH_WO<br>O | 36 | NYWHATFORD/7388-<br>39-693 | NA   | 22.0 | 13.7 |
| 2017 | NUS | 2017_OH_WO<br>O | 37 | NY09087-15-69-1124         | NA   | 9.0  | 3.0  |
| 2017 | NUS | 2017_OH_WO<br>O | 38 | NY01016-AN                 | NA   | 17.0 | 29.8 |
| 2017 | NUS | 2017_OH_WO<br>O | 39 | NY09125-16-1034            | NA   | 13.0 | 12.1 |
| 2017 | NUS | 2017_OH_WO<br>O | 40 | MO140304                   | NA   | 13.0 | 7.5  |
| 2017 | NUS | 2017_OH_WO<br>O | 41 | MO151323                   | NA   | 12.0 | 3.2  |
| 2017 | NUS | 2017_OH_WO<br>O | 42 | MO151031                   | NA   | 19.0 | 11.4 |
| 2017 | NUS | 2017_OH_WO<br>O | 43 | MO151826                   | NA   | 11.0 | 4.4  |
| 2017 | NUS | 2017_OH_WO<br>O | 44 | MO150133                   | NA   | 10.0 | 3.2  |
| 2017 | NUS | 2017_OH_WO<br>O | 45 | 0566A1-3-1-1-63            | NA   | 22.0 | 6.8  |
| 2017 | NUS | 2017_OH_WO<br>O | 46 | 04620A1-1-7-4-10           | NA   | 25.0 | 7.9  |
| 2017 | NUS | 2017_OH_WO<br>O | 47 | 0527A1-9-14-4-3-3          | NA   | 15.0 | 2.9  |
| 2017 | NUS | 2017_OH_WO<br>O | 48 | 0762A1-2-8                 | NA   | 19.0 | 3.2  |
| 2017 | NUS | 2017_OH_WO<br>O | 49 | 07419A1-16-1-1-16-1-1      | NA   | 70.0 | 19.3 |
| 2017 | NUS | 2017_OH_WO<br>O | 50 | LES15-5199                 | NA   | 46.0 | 10.3 |
| 2017 | NUS | 2017_OH_WO<br>O | 51 | LES15-7011                 | NA   | 26.0 | 4.3  |
| 2017 | NUS | 2017_OH_WO<br>O | 52 | LES15-5540                 | NA   | 57.0 | 15.1 |
| 2017 | NUS | 2017_OH_WO<br>O | 53 | LES15-5605                 | NA   | 32.0 | 8.4  |
| 2017 | NUS | 2017_OH_WO<br>O | 54 | LES15-7004                 | NA   | 37.0 | 9.6  |
| 2017 | NUS | 2017_OH_WO<br>O | 55 | U6714-B-041                | NA   | 42.0 | 28.9 |
| 2017 | NUS | 2017_OH_WO<br>O | 56 | MI14R0008                  | NA   | 26.0 | 7.2  |
| 2017 | NUS | 2017_OH_WO<br>O | 57 | MI14R0009                  | NA   | 17.0 | 9.7  |
| 2017 | NUS | 2017_OH_WO<br>O | 58 | MI14R0421                  | NA   | 47.0 | 15.0 |
| 2017 | NUS | 2017_OH_WO<br>O | 59 | MI14R0267                  | NA   | 32.0 | 9.6  |
| 2017 | NUS | 2017_OH_WO<br>O | 60 | OH09-207-68                | NA   | 29.0 | 6.8  |
| 2017 | NUS | 2017_IL_CHA     | 1  | TRUMAN                     | 2.5  | NA   | NA   |
| 2017 | NUS | 2017_IL_CHA     | 2  | ERNIE                      | 25.0 | NA   | NA   |
| 2017 | NUS | 2017_IL_CHA     | 3  | FREEDOM                    | 20.0 | NA   | NA   |

|      |     |             |    |                        |      |    |    |
|------|-----|-------------|----|------------------------|------|----|----|
| 2017 | NUS | 2017_IL_CHA | 4  | PIONEER2545            | 50.0 | NA | NA |
| 2017 | NUS | 2017_IL_CHA | 5  | VA11W-108PA            | 10.0 | NA | NA |
| 2017 | NUS | 2017_IL_CHA | 6  | VA09MAS1-12-5-1        | 12.5 | NA | NA |
| 2017 | NUS | 2017_IL_CHA | 7  | VA14FHB-29             | 25.0 | NA | NA |
| 2017 | NUS | 2017_IL_CHA | 8  | VA09MAS8-34-5-2        | 45.0 | NA | NA |
| 2017 | NUS | 2017_IL_CHA | 9  | VA09MAS3-34-2-1        | 12.5 | NA | NA |
| 2017 | NUS | 2017_IL_CHA | 10 | KY09C-0052-26-12-3     | 5.0  | NA | NA |
| 2017 | NUS | 2017_IL_CHA | 11 | X08C-1070-74-20-1      | 7.5  | NA | NA |
| 2017 | NUS | 2017_IL_CHA | 12 | KY09C-1245-100-1-3     | 7.5  | NA | NA |
| 2017 | NUS | 2017_IL_CHA | 13 | KY09C-0267-45-16-3     | 5.0  | NA | NA |
| 2017 | NUS | 2017_IL_CHA | 14 | X08C-1090-51-12-5      | 15.0 | NA | NA |
| 2017 | NUS | 2017_IL_CHA | 15 | OH12-195-22            | 40.0 | NA | NA |
| 2017 | NUS | 2017_IL_CHA | 16 | OH11-118-18            | 2.5  | NA | NA |
| 2017 | NUS | 2017_IL_CHA | 17 | OH12-133-74            | 25.0 | NA | NA |
| 2017 | NUS | 2017_IL_CHA | 18 | OH12-194-24            | 40.0 | NA | NA |
| 2017 | NUS | 2017_IL_CHA | 19 | OH13-16-25             | 12.5 | NA | NA |
| 2017 | NUS | 2017_IL_CHA | 20 | NE14538                | 22.5 | NA | NA |
| 2017 | NUS | 2017_IL_CHA | 21 | NE14606                | 17.5 | NA | NA |
| 2017 | NUS | 2017_IL_CHA | 22 | NE14696                | 2.5  | NA | NA |
| 2017 | NUS | 2017_IL_CHA | 23 | NI12702W               | 15.0 | NA | NA |
| 2017 | NUS | 2017_IL_CHA | 24 | NE15545                | 12.5 | NA | NA |
| 2017 | NUS | 2017_IL_CHA | 25 | KWS095                 | 22.5 | NA | NA |
| 2017 | NUS | 2017_IL_CHA | 26 | KWS103                 | 15.0 | NA | NA |
| 2017 | NUS | 2017_IL_CHA | 27 | KWS122                 | 5.0  | NA | NA |
| 2017 | NUS | 2017_IL_CHA | 28 | KWS127                 | 42.5 | NA | NA |
| 2017 | NUS | 2017_IL_CHA | 29 | KWS141                 | 15.0 | NA | NA |
| 2017 | NUS | 2017_IL_CHA | 30 | IL09-3264-T2           | 5.0  | NA | NA |
| 2017 | NUS | 2017_IL_CHA | 31 | IL12-21235             | 0.0  | NA | NA |
| 2017 | NUS | 2017_IL_CHA | 32 | IL12-26004             | 0.0  | NA | NA |
| 2017 | NUS | 2017_IL_CHA | 33 | IL13-451               | 2.5  | NA | NA |
| 2017 | NUS | 2017_IL_CHA | 34 | IL13-20616             | 0.0  | NA | NA |
| 2017 | NUS | 2017_IL_CHA | 35 | NY99056-161            | 22.5 | NA | NA |
| 2017 | NUS | 2017_IL_CHA | 36 | NYWHATFORD/7388-39-693 | 6.0  | NA | NA |
| 2017 | NUS | 2017_IL_CHA | 37 | NY09087-15-69-1124     | 0.0  | NA | NA |
| 2017 | NUS | 2017_IL_CHA | 38 | NY01016-AN             | 20.0 | NA | NA |
| 2017 | NUS | 2017_IL_CHA | 39 | NY09125-16-1034        | 12.5 | NA | NA |
| 2017 | NUS | 2017_IL_CHA | 40 | MO140304               | 15.0 | NA | NA |
| 2017 | NUS | 2017_IL_CHA | 41 | MO151323               | 5.0  | NA | NA |
| 2017 | NUS | 2017_IL_CHA | 42 | MO151031               | 12.5 | NA | NA |
| 2017 | NUS | 2017_IL_CHA | 43 | MO151826               | 3.5  | NA | NA |
| 2017 | NUS | 2017_IL_CHA | 44 | MO150133               | 2.5  | NA | NA |
| 2017 | NUS | 2017_IL_CHA | 45 | 0566A1-3-1-1-63        | 7.5  | NA | NA |
| 2017 | NUS | 2017_IL_CHA | 46 | 04620A1-1-7-4-10       | 2.5  | NA | NA |
| 2017 | NUS | 2017_IL_CHA | 47 | 0527A1-9-14-4-3-3      | 12.5 | NA | NA |
| 2017 | NUS | 2017_IL_CHA | 48 | 0762A1-2-8             | 2.5  | NA | NA |
| 2017 | NUS | 2017_IL_CHA | 49 | 07419A1-16-1-1-16-1-1  | 32.5 | NA | NA |
| 2017 | NUS | 2017_IL_CHA | 50 | LES15-5199             | 10.0 | NA | NA |
| 2017 | NUS | 2017_IL_CHA | 51 | LES15-7011             | 5.0  | NA | NA |
| 2017 | NUS | 2017_IL_CHA | 52 | LES15-5540             | 10.0 | NA | NA |



|      |     |             |    |                        |      |    |    |
|------|-----|-------------|----|------------------------|------|----|----|
| 2017 | NUS | 2017_IL_CHA | 53 | LES15-5605             | 20.0 | NA | NA |
| 2017 | NUS | 2017_IL_CHA | 54 | LES15-7004             | 20.0 | NA | NA |
| 2017 | NUS | 2017_IL_CHA | 55 | U6714-B-041            | 35.0 | NA | NA |
| 2017 | NUS | 2017_IL_CHA | 56 | MI14R0008              | 45.0 | NA | NA |
| 2017 | NUS | 2017_IL_CHA | 57 | MI14R0009              | 50.0 | NA | NA |
| 2017 | NUS | 2017_IL_CHA | 58 | MI14R0421              | 5.0  | NA | NA |
| 2017 | NUS | 2017_IL_CHA | 59 | MI14R0267              | 20.0 | NA | NA |
| 2017 | NUS | 2017_IL_CHA | 60 | OH09-207-68            | 25.0 | NA | NA |
| 2017 | NUS | 2017_MI_ELA | 1  | TRUMAN                 | 19.6 | NA | NA |
| 2017 | NUS | 2017_MI_ELA | 2  | ERNIE                  | 51.0 | NA | NA |
| 2017 | NUS | 2017_MI_ELA | 3  | FREEDOM                | 35.1 | NA | NA |
| 2017 | NUS | 2017_MI_ELA | 4  | PIONEER2545            | 52.1 | NA | NA |
| 2017 | NUS | 2017_MI_ELA | 5  | VA11W-108PA            | 43.3 | NA | NA |
| 2017 | NUS | 2017_MI_ELA | 6  | VA09MAS1-12-5-1        | 25.2 | NA | NA |
| 2017 | NUS | 2017_MI_ELA | 7  | VA14FHB-29             | 28.3 | NA | NA |
| 2017 | NUS | 2017_MI_ELA | 8  | VA09MAS8-34-5-2        | 53.6 | NA | NA |
| 2017 | NUS | 2017_MI_ELA | 9  | VA09MAS3-34-2-1        | 54.4 | NA | NA |
| 2017 | NUS | 2017_MI_ELA | 10 | KY09C-0052-26-12-3     | 52.0 | NA | NA |
| 2017 | NUS | 2017_MI_ELA | 11 | X08C-1070-74-20-1      | 46.0 | NA | NA |
| 2017 | NUS | 2017_MI_ELA | 12 | KY09C-1245-100-1-3     | 42.5 | NA | NA |
| 2017 | NUS | 2017_MI_ELA | 13 | KY09C-0267-45-16-3     | 24.7 | NA | NA |
| 2017 | NUS | 2017_MI_ELA | 14 | X08C-1090-51-12-5      | 48.7 | NA | NA |
| 2017 | NUS | 2017_MI_ELA | 15 | OH12-195-22            | 44.8 | NA | NA |
| 2017 | NUS | 2017_MI_ELA | 16 | OH11-118-18            | 26.6 | NA | NA |
| 2017 | NUS | 2017_MI_ELA | 17 | OH12-133-74            | 28.6 | NA | NA |
| 2017 | NUS | 2017_MI_ELA | 18 | OH12-194-24            | 50.9 | NA | NA |
| 2017 | NUS | 2017_MI_ELA | 19 | OH13-16-25             | 58.8 | NA | NA |
| 2017 | NUS | 2017_MI_ELA | 20 | NE14538                | 26.7 | NA | NA |
| 2017 | NUS | 2017_MI_ELA | 21 | NE14606                | 32.0 | NA | NA |
| 2017 | NUS | 2017_MI_ELA | 22 | NE14696                | 27.8 | NA | NA |
| 2017 | NUS | 2017_MI_ELA | 23 | NI12702W               | 32.4 | NA | NA |
| 2017 | NUS | 2017_MI_ELA | 24 | NE15545                | 60.5 | NA | NA |
| 2017 | NUS | 2017_MI_ELA | 25 | KWS095                 | 38.3 | NA | NA |
| 2017 | NUS | 2017_MI_ELA | 26 | KWS103                 | 59.6 | NA | NA |
| 2017 | NUS | 2017_MI_ELA | 27 | KWS122                 | NA   | NA | NA |
| 2017 | NUS | 2017_MI_ELA | 28 | KWS127                 | NA   | NA | NA |
| 2017 | NUS | 2017_MI_ELA | 29 | KWS141                 | NA   | NA | NA |
| 2017 | NUS | 2017_MI_ELA | 30 | IL09-3264-T2           | 54.5 | NA | NA |
| 2017 | NUS | 2017_MI_ELA | 31 | IL12-21235             | 53.7 | NA | NA |
| 2017 | NUS | 2017_MI_ELA | 32 | IL12-26004             | 68.9 | NA | NA |
| 2017 | NUS | 2017_MI_ELA | 33 | IL13-451               | 43.8 | NA | NA |
| 2017 | NUS | 2017_MI_ELA | 34 | IL13-20616             | 46.1 | NA | NA |
| 2017 | NUS | 2017_MI_ELA | 35 | NY99056-161            | 22.9 | NA | NA |
| 2017 | NUS | 2017_MI_ELA | 36 | NYWHATFORD/7388-39-693 | 15.5 | NA | NA |
| 2017 | NUS | 2017_MI_ELA | 37 | NY09087-15-69-1124     | 14.2 | NA | NA |
| 2017 | NUS | 2017_MI_ELA | 38 | NY01016-AN             | 43.7 | NA | NA |
| 2017 | NUS | 2017_MI_ELA | 39 | NY09125-16-1034        | 52.8 | NA | NA |
| 2017 | NUS | 2017_MI_ELA | 40 | MO140304               | 26.6 | NA | NA |
| 2017 | NUS | 2017_MI_ELA | 41 | MO151323               | 32.0 | NA | NA |

|      |     |             |    |                       |      |      |     |
|------|-----|-------------|----|-----------------------|------|------|-----|
| 2017 | NUS | 2017_MI_ELA | 42 | MO151031              | 53.1 | NA   | NA  |
| 2017 | NUS | 2017_MI_ELA | 43 | MO151826              | 41.9 | NA   | NA  |
| 2017 | NUS | 2017_MI_ELA | 44 | MO150133              | 32.2 | NA   | NA  |
| 2017 | NUS | 2017_MI_ELA | 45 | 0566A1-3-1-1-63       | 53.2 | NA   | NA  |
| 2017 | NUS | 2017_MI_ELA | 46 | 04620A1-1-7-4-10      | 36.7 | NA   | NA  |
| 2017 | NUS | 2017_MI_ELA | 47 | 0527A1-9-14-4-3-3     | 41.0 | NA   | NA  |
| 2017 | NUS | 2017_MI_ELA | 48 | 0762A1-2-8            | 21.6 | NA   | NA  |
| 2017 | NUS | 2017_MI_ELA | 49 | 07419A1-16-1-1-16-1-1 | 43.8 | NA   | NA  |
| 2017 | NUS | 2017_MI_ELA | 50 | LES15-5199            | 45.2 | NA   | NA  |
| 2017 | NUS | 2017_MI_ELA | 51 | LES15-7011            | 57.1 | NA   | NA  |
| 2017 | NUS | 2017_MI_ELA | 52 | LES15-5540            | 50.0 | NA   | NA  |
| 2017 | NUS | 2017_MI_ELA | 53 | LES15-5605            | 61.2 | NA   | NA  |
| 2017 | NUS | 2017_MI_ELA | 54 | LES15-7004            | 64.5 | NA   | NA  |
| 2017 | NUS | 2017_MI_ELA | 55 | U6714-B-041           | 60.2 | NA   | NA  |
| 2017 | NUS | 2017_MI_ELA | 56 | MI14R0008             | 51.3 | NA   | NA  |
| 2017 | NUS | 2017_MI_ELA | 57 | MI14R0009             | 44.2 | NA   | NA  |
| 2017 | NUS | 2017_MI_ELA | 58 | MI14R0421             | 41.9 | NA   | NA  |
| 2017 | NUS | 2017_MI_ELA | 59 | MI14R0267             | 31.8 | NA   | NA  |
| 2017 | NUS | 2017_MI_ELA | 60 | OH09-207-68           | 40.2 | NA   | NA  |
| 2017 | NUS | 2017_VA_MT  |    |                       |      |      |     |
| 2017 | NUS | H           | 1  | TRUMAN                | 10.0 | 31.5 | 0.8 |
| 2017 | NUS | 2017_VA_MT  |    |                       |      |      |     |
| 2017 | NUS | H           | 2  | ERNIE                 | 17.1 | 21.0 | 1.4 |
| 2017 | NUS | 2017_VA_MT  |    |                       |      |      |     |
| 2017 | NUS | H           | 3  | FREEDOM               | 22.5 | 38.5 | 1.4 |
| 2017 | NUS | 2017_VA_MT  |    |                       |      |      |     |
| 2017 | NUS | H           | 4  | PIONEER2545           | 39.9 | 34.5 | 5.9 |
| 2017 | NUS | 2017_VA_MT  |    |                       |      |      |     |
| 2017 | NUS | H           | 5  | VA11W-108PA           | 33.7 | 38.5 | 2.1 |
| 2017 | NUS | 2017_VA_MT  |    |                       |      |      |     |
| 2017 | NUS | H           | 6  | VA09MAS1-12-5-1       | 37.6 | 17.0 | 1.6 |
| 2017 | NUS | 2017_VA_MT  |    |                       |      |      |     |
| 2017 | NUS | H           | 7  | VA14FHB-29            | 28.8 | 26.5 | 0.9 |
| 2017 | NUS | 2017_VA_MT  |    |                       |      |      |     |
| 2017 | NUS | H           | 8  | VA09MAS8-34-5-2       | 36.2 | 37.0 | 3.2 |
| 2017 | NUS | 2017_VA_MT  |    |                       |      |      |     |
| 2017 | NUS | H           | 9  | VA09MAS3-34-2-1       | 35.0 | 21.0 | 1.7 |
| 2017 | NUS | 2017_VA_MT  |    |                       |      |      |     |
| 2017 | NUS | H           | 10 | KY09C-0052-26-12-3    | 17.7 | 17.5 | 1.0 |
| 2017 | NUS | 2017_VA_MT  |    |                       |      |      |     |
| 2017 | NUS | H           | 11 | X08C-1070-74-20-1     | 18.7 | 22.5 | 0.9 |
| 2017 | NUS | 2017_VA_MT  |    |                       |      |      |     |
| 2017 | NUS | H           | 12 | KY09C-1245-100-1-3    | 31.7 | 17.0 | 1.0 |
| 2017 | NUS | 2017_VA_MT  |    |                       |      |      |     |
| 2017 | NUS | H           | 13 | KY09C-0267-45-16-3    | 11.7 | 18.0 | 1.4 |
| 2017 | NUS | 2017_VA_MT  |    |                       |      |      |     |
| 2017 | NUS | H           | 14 | X08C-1090-51-12-5     | 33.8 | 26.5 | 1.4 |
| 2017 | NUS | 2017_VA_MT  |    |                       |      |      |     |
| 2017 | NUS | H           | 15 | OH12-195-22           | 24.4 | 16.5 | 1.5 |
| 2017 | NUS | 2017_VA_MT  |    |                       |      |      |     |
| 2017 | NUS | H           | 16 | OH11-118-18           | 8.6  | 44.5 | 1.0 |
| 2017 | NUS | 2017_VA_MT  |    |                       |      |      |     |
| 2017 | NUS | H           | 17 | OH12-133-74           | 29.6 | 47.5 | 1.7 |

|      |     |                 |    |                            |      |      |     |
|------|-----|-----------------|----|----------------------------|------|------|-----|
| 2017 | NUS | 2017_VA_MT<br>H | 18 | OH12-194-24                | 31.8 | 26.5 | 1.7 |
| 2017 | NUS | 2017_VA_MT<br>H | 19 | OH13-16-25                 | 45.4 | 26.5 | 1.8 |
| 2017 | NUS | 2017_VA_MT<br>H | 20 | NE14538                    | 10.6 | 41.0 | 1.5 |
| 2017 | NUS | 2017_VA_MT<br>H | 21 | NE14606                    | 11.6 | 57.0 | 4.9 |
| 2017 | NUS | 2017_VA_MT<br>H | 22 | NE14696                    | 9.5  | 41.5 | 2.6 |
| 2017 | NUS | 2017_VA_MT<br>H | 23 | NI12702W                   | 13.9 | 53.0 | 4.0 |
| 2017 | NUS | 2017_VA_MT<br>H | 24 | NE15545                    | 18.7 | 43.5 | 3.7 |
| 2017 | NUS | 2017_VA_MT<br>H | 25 | KWS095                     | 26.2 | 32.0 | 1.5 |
| 2017 | NUS | 2017_VA_MT<br>H | 26 | KWS103                     | 37.8 | 27.5 | 2.2 |
| 2017 | NUS | 2017_VA_MT<br>H | 27 | KWS122                     | 22.4 | 26.5 | 0.6 |
| 2017 | NUS | 2017_VA_MT<br>H | 28 | KWS127                     | 33.0 | 23.0 | 3.0 |
| 2017 | NUS | 2017_VA_MT<br>H | 29 | KWS141                     | 15.8 | 27.5 | 1.3 |
| 2017 | NUS | 2017_VA_MT<br>H | 30 | IL09-3264-T2               | 34.2 | 32.5 | 1.1 |
| 2017 | NUS | 2017_VA_MT<br>H | 31 | IL12-21235                 | 19.0 | 24.5 | 1.0 |
| 2017 | NUS | 2017_VA_MT<br>H | 32 | IL12-26004                 | 7.4  | 19.5 | 0.6 |
| 2017 | NUS | 2017_VA_MT<br>H | 33 | IL13-451                   | 16.0 | 19.5 | 0.2 |
| 2017 | NUS | 2017_VA_MT<br>H | 34 | IL13-20616                 | 9.2  | 27.0 | 0.6 |
| 2017 | NUS | 2017_VA_MT<br>H | 35 | NY99056-161                | 18.3 | 53.0 | 5.5 |
| 2017 | NUS | 2017_VA_MT<br>H | 36 | NYWHATFORD/7388-<br>39-693 | 10.3 | 51.0 | 2.2 |
| 2017 | NUS | 2017_VA_MT<br>H | 37 | NY09087-15-69-1124         | 8.5  | 25.0 | 0.6 |
| 2017 | NUS | 2017_VA_MT<br>H | 38 | NY01016-AN                 | 27.3 | 31.5 | 4.2 |
| 2017 | NUS | 2017_VA_MT<br>H | 39 | NY09125-16-1034            | 15.4 | 46.0 | 1.9 |
| 2017 | NUS | 2017_VA_MT<br>H | 40 | MO140304                   | 10.0 | 14.5 | 1.3 |
| 2017 | NUS | 2017_VA_MT<br>H | 41 | MO151323                   | 7.6  | 21.5 | 0.8 |
| 2017 | NUS | 2017_VA_MT<br>H | 42 | MO151031                   | 17.5 | 20.0 | 0.9 |
| 2017 | NUS | 2017_VA_MT<br>H | 43 | MO151826                   | 11.7 | 20.5 | 0.7 |
| 2017 | NUS | 2017_VA_MT<br>H | 44 | MO150133                   | 13.8 | 20.0 | 0.3 |
| 2017 | NUS | 2017_VA_MT<br>H | 45 | 0566A1-3-1-1-63            | 27.5 | 20.0 | 1.9 |

|      |     |                 |    |                       |      |      |      |
|------|-----|-----------------|----|-----------------------|------|------|------|
| 2017 | NUS | 2017_VA_MT<br>H | 46 | 04620A1-1-7-4-10      | 16.9 | 27.5 | 1.7  |
| 2017 | NUS | 2017_VA_MT<br>H | 47 | 0527A1-9-14-4-3-3     | 15.8 | 18.5 | 0.6  |
| 2017 | NUS | 2017_VA_MT<br>H | 48 | 0762A1-2-8            | 6.8  | 22.5 | 0.4  |
| 2017 | NUS | 2017_VA_MT<br>H | 49 | 07419A1-16-1-1-16-1-1 | 34.4 | 28.5 | 2.4  |
| 2017 | NUS | 2017_VA_MT<br>H | 50 | LES15-5199            | 28.5 | 39.0 | 2.3  |
| 2017 | NUS | 2017_VA_MT<br>H | 51 | LES15-7011            | 26.9 | 26.5 | 1.1  |
| 2017 | NUS | 2017_VA_MT<br>H | 52 | LES15-5540            | 24.4 | 40.0 | 1.6  |
| 2017 | NUS | 2017_VA_MT<br>H | 53 | LES15-5605            | 41.4 | 25.5 | 1.1  |
| 2017 | NUS | 2017_VA_MT<br>H | 54 | LES15-7004            | 17.8 | 13.5 | 0.9  |
| 2017 | NUS | 2017_VA_MT<br>H | 55 | U6714-B-041           | 15.4 | 44.0 | 7.7  |
| 2017 | NUS | 2017_VA_MT<br>H | 56 | MI14R0008             | 51.0 | 26.0 | 2.4  |
| 2017 | NUS | 2017_VA_MT<br>H | 57 | MI14R0009             | 62.7 | 23.5 | 2.9  |
| 2017 | NUS | 2017_VA_MT<br>H | 58 | MI14R0421             | 24.1 | 35.0 | 1.2  |
| 2017 | NUS | 2017_VA_MT<br>H | 59 | MI14R0267             | 21.1 | 20.5 | 2.3  |
| 2017 | NUS | 2017_VA_MT<br>H | 60 | OH09-207-68           | 27.0 | 32.5 | 1.3  |
| 2017 | NUS | 2017_KY_LEX     | 1  | TRUMAN                | 32.0 | 10.0 | 5.5  |
| 2017 | NUS | 2017_KY_LEX     | 2  | ERNIE                 | 49.7 | 42.5 | 15.5 |
| 2017 | NUS | 2017_KY_LEX     | 3  | FREEDOM               | 42.2 | 65.0 | 23.1 |
| 2017 | NUS | 2017_KY_LEX     | 4  | PIONEER2545           | 43.7 | 65.0 | 26.9 |
| 2017 | NUS | 2017_KY_LEX     | 5  | VA11W-108PA           | 25.8 | 60.0 | 21.3 |
| 2017 | NUS | 2017_KY_LEX     | 6  | VA09MAS1-12-5-1       | 26.0 | 20.0 | 15.1 |
| 2017 | NUS | 2017_KY_LEX     | 7  | VA14FHB-29            | 45.3 | 52.5 | 21.8 |
| 2017 | NUS | 2017_KY_LEX     | 8  | VA09MAS8-34-5-2       | 17.8 | 47.5 | 17.3 |
| 2017 | NUS | 2017_KY_LEX     | 9  | VA09MAS3-34-2-1       | 21.9 | 45.0 | 20.1 |
| 2017 | NUS | 2017_KY_LEX     | 10 | KY09C-0052-26-12-3    | 26.0 | 17.5 | 9.5  |
| 2017 | NUS | 2017_KY_LEX     | 11 | X08C-1070-74-20-1     | 31.8 | 12.5 | 7.2  |
| 2017 | NUS | 2017_KY_LEX     | 12 | KY09C-1245-100-1-3    | 36.4 | 40.0 | 11.3 |
| 2017 | NUS | 2017_KY_LEX     | 13 | KY09C-0267-45-16-3    | 35.9 | 27.5 | 14.1 |
| 2017 | NUS | 2017_KY_LEX     | 14 | X08C-1090-51-12-5     | 43.8 | 30.0 | 13.0 |
| 2017 | NUS | 2017_KY_LEX     | 15 | OH12-195-22           | 35.8 | 37.5 | 15.6 |
| 2017 | NUS | 2017_KY_LEX     | 16 | OH11-118-18           | 35.9 | 7.5  | 3.4  |
| 2017 | NUS | 2017_KY_LEX     | 17 | OH12-133-74           | 35.4 | 30.0 | 9.8  |
| 2017 | NUS | 2017_KY_LEX     | 18 | OH12-194-24           | 38.8 | 47.5 | 22.3 |
| 2017 | NUS | 2017_KY_LEX     | 19 | OH13-16-25            | 23.1 | 37.5 | 15.3 |
| 2017 | NUS | 2017_KY_LEX     | 20 | NE14538               | 25.7 | 55.0 | 16.6 |
| 2017 | NUS | 2017_KY_LEX     | 21 | NE14606               | 35.5 | 37.5 | 12.7 |
| 2017 | NUS | 2017_KY_LEX     | 22 | NE14696               | 52.8 | 32.5 | 17.7 |
| 2017 | NUS | 2017_KY_LEX     | 23 | NI12702W              | 26.8 | 45.0 | 15.9 |

|      |     |             |    |                       |      |      |      |
|------|-----|-------------|----|-----------------------|------|------|------|
| 2017 | NUS | 2017_KY_LEX | 24 | NE15545               | 28.2 | 42.5 | 20.2 |
| 2017 | NUS | 2017_KY_LEX | 25 | KWS095                | 39.2 | 35.0 | 8.8  |
| 2017 | NUS | 2017_KY_LEX | 26 | KWS103                | 30.5 | 57.5 | 12.8 |
| 2017 | NUS | 2017_KY_LEX | 27 | KWS122                | 36.7 | 20.0 | 10.4 |
| 2017 | NUS | 2017_KY_LEX | 28 | KWS127                | 40.5 | 65.0 | 25.2 |
| 2017 | NUS | 2017_KY_LEX | 29 | KWS141                | 45.5 | 42.5 | 20.1 |
| 2017 | NUS | 2017_KY_LEX | 30 | IL09-3264-T2          | 47.5 | 32.5 | 9.4  |
| 2017 | NUS | 2017_KY_LEX | 31 | IL12-21235            | 29.2 | 12.5 | 12.0 |
| 2017 | NUS | 2017_KY_LEX | 32 | IL12-26004            | 36.1 | 7.5  | 7.3  |
| 2017 | NUS | 2017_KY_LEX | 33 | IL13-451              | 33.8 | 40.0 | 10.3 |
| 2017 | NUS | 2017_KY_LEX | 34 | IL13-20616            | 36.4 | 25.0 | 9.5  |
| 2017 | NUS | 2017_KY_LEX | 35 | NY99056-161           | 32.7 | 17.5 | 14.2 |
|      |     |             |    | NYWHATFORD/7388-      |      |      |      |
| 2017 | NUS | 2017_KY_LEX | 36 | 39-693                | 29.2 | 7.5  | 6.1  |
| 2017 | NUS | 2017_KY_LEX | 37 | NY09087-15-69-1124    | 21.2 | 12.5 | 4.2  |
| 2017 | NUS | 2017_KY_LEX | 38 | NY01016-AN            | 25.3 | 37.5 | 24.2 |
| 2017 | NUS | 2017_KY_LEX | 39 | NY09125-16-1034       | 41.2 | 37.5 | 19.5 |
| 2017 | NUS | 2017_KY_LEX | 40 | MO140304              | 40.9 | 22.5 | 14.6 |
| 2017 | NUS | 2017_KY_LEX | 41 | MO151323              | 44.7 | 12.5 | 7.4  |
| 2017 | NUS | 2017_KY_LEX | 42 | MO151031              | 35.4 | 42.5 | 14.8 |
| 2017 | NUS | 2017_KY_LEX | 43 | MO151826              | 29.0 | 12.5 | 11.0 |
| 2017 | NUS | 2017_KY_LEX | 44 | MO150133              | 35.1 | 12.5 | 5.7  |
| 2017 | NUS | 2017_KY_LEX | 45 | 0566A1-3-1-1-63       | 28.7 | 32.5 | 14.0 |
| 2017 | NUS | 2017_KY_LEX | 46 | 04620A1-1-7-4-10      | 49.3 | 37.5 | 14.4 |
| 2017 | NUS | 2017_KY_LEX | 47 | 0527A1-9-14-4-3-3     | 39.0 | 42.5 | 7.7  |
| 2017 | NUS | 2017_KY_LEX | 48 | 0762A1-2-8            | 31.6 | 20.0 | 9.6  |
| 2017 | NUS | 2017_KY_LEX | 49 | 07419A1-16-1-1-16-1-1 | 48.4 | 57.5 | 18.3 |
| 2017 | NUS | 2017_KY_LEX | 50 | LES15-5199            | 37.4 | 65.0 | 20.4 |
| 2017 | NUS | 2017_KY_LEX | 51 | LES15-7011            | 26.7 | 32.5 | 16.9 |
| 2017 | NUS | 2017_KY_LEX | 52 | LES15-5540            | 47.6 | 37.5 | 14.4 |
| 2017 | NUS | 2017_KY_LEX | 53 | LES15-5605            | 35.8 | 40.0 | 11.5 |
| 2017 | NUS | 2017_KY_LEX | 54 | LES15-7004            | 48.2 | 37.5 | 16.3 |
| 2017 | NUS | 2017_KY_LEX | 55 | U6714-B-041           | 24.7 | 77.5 | 47.1 |
| 2017 | NUS | 2017_KY_LEX | 56 | MI14R0008             | 33.8 | 25.0 | 11.4 |
| 2017 | NUS | 2017_KY_LEX | 57 | MI14R0009             | 33.9 | 17.5 | 9.4  |
| 2017 | NUS | 2017_KY_LEX | 58 | MI14R0421             | 35.1 | 47.5 | 12.9 |
| 2017 | NUS | 2017_KY_LEX | 59 | MI14R0267             | 24.9 | 15.0 | 15.3 |
| 2017 | NUS | 2017_KY_LEX | 60 | OH09-207-68           | 37.4 | 35.0 | 13.9 |
| 2017 | NUS | 2017_NY_ITH | 1  | TRUMAN                | 6.4  | 15.0 | 1.9  |
| 2017 | NUS | 2017_NY_ITH | 2  | ERNIE                 | 10.2 | 50.0 | 9.5  |
| 2017 | NUS | 2017_NY_ITH | 3  | FREEDOM               | 10.0 | 60.0 | 6.8  |
| 2017 | NUS | 2017_NY_ITH | 4  | PIONEER2545           | 19.0 | 90.0 | 25.9 |
| 2017 | NUS | 2017_NY_ITH | 5  | VA11W-108PA           | 13.4 | 55.0 | 8.7  |
| 2017 | NUS | 2017_NY_ITH | 6  | VA09MAS1-12-5-1       | 14.6 | 30.0 | 7.7  |
| 2017 | NUS | 2017_NY_ITH | 7  | VA14FHB-29            | 15.8 | 50.0 | 10.6 |
| 2017 | NUS | 2017_NY_ITH | 8  | VA09MAS8-34-5-2       | 12.0 | 90.0 | 11.5 |
| 2017 | NUS | 2017_NY_ITH | 9  | VA09MAS3-34-2-1       | 11.4 | 40.0 | 9.6  |
| 2017 | NUS | 2017_NY_ITH | 10 | KY09C-0052-26-12-3    | 9.6  | 10.0 | 3.4  |
| 2017 | NUS | 2017_NY_ITH | 11 | X08C-1070-74-20-1     | 8.8  | 45.0 | 8.5  |
| 2017 | NUS | 2017_NY_ITH | 12 | KY09C-1245-100-1-3    | 10.6 | 40.0 | 5.2  |

|      |     |             |    |                       |      |      |      |
|------|-----|-------------|----|-----------------------|------|------|------|
| 2017 | NUS | 2017_NY_ITH | 13 | KY09C-0267-45-16-3    | 6.8  | 30.0 | 7.3  |
| 2017 | NUS | 2017_NY_ITH | 14 | X08C-1090-51-12-5     | 7.8  | 25.0 | 5.5  |
| 2017 | NUS | 2017_NY_ITH | 15 | OH12-195-22           | 11.0 | 75.0 | 9.7  |
| 2017 | NUS | 2017_NY_ITH | 16 | OH11-118-18           | 1.2  | 10.0 | 2.4  |
| 2017 | NUS | 2017_NY_ITH | 17 | OH12-133-74           | 11.0 | 65.0 | 5.9  |
| 2017 | NUS | 2017_NY_ITH | 18 | OH12-194-24           | 20.8 | 80.0 | 12.1 |
| 2017 | NUS | 2017_NY_ITH | 19 | OH13-16-25            | 10.0 | 55.0 | 14.3 |
| 2017 | NUS | 2017_NY_ITH | 20 | NE14538               | 10.0 | 55.0 | 11.2 |
| 2017 | NUS | 2017_NY_ITH | 21 | NE14606               | 11.4 | 40.0 | 11.7 |
| 2017 | NUS | 2017_NY_ITH | 22 | NE14696               | 11.4 | 45.0 | 7.9  |
| 2017 | NUS | 2017_NY_ITH | 23 | NI12702W              | 6.4  | 25.0 | 10.6 |
| 2017 | NUS | 2017_NY_ITH | 24 | NE15545               | 8.0  | 40.0 | 4.6  |
| 2017 | NUS | 2017_NY_ITH | 25 | KWS095                | 14.2 | 45.0 | 6.7  |
| 2017 | NUS | 2017_NY_ITH | 26 | KWS103                | 20.6 | 45.0 | 9.4  |
| 2017 | NUS | 2017_NY_ITH | 27 | KWS122                | 13.6 | 20.0 | 4.6  |
| 2017 | NUS | 2017_NY_ITH | 28 | KWS127                | 10.6 | 55.0 | 12.4 |
| 2017 | NUS | 2017_NY_ITH | 29 | KWS141                | 8.0  | 30.0 | 6.2  |
| 2017 | NUS | 2017_NY_ITH | 30 | IL09-3264-T2          | 9.2  | 30.0 | 5.8  |
| 2017 | NUS | 2017_NY_ITH | 31 | IL12-21235            | 11.2 | 10.0 | 4.6  |
| 2017 | NUS | 2017_NY_ITH | 32 | IL12-26004            | 11.4 | 35.0 | 5.2  |
| 2017 | NUS | 2017_NY_ITH | 33 | IL13-451              | 7.8  | 15.0 | 2.2  |
| 2017 | NUS | 2017_NY_ITH | 34 | IL13-20616            | 9.0  | 20.0 | 2.5  |
| 2017 | NUS | 2017_NY_ITH | 35 | NY99056-161           | 13.4 | 25.0 | 8.1  |
|      |     |             |    | NYWHATFORD/7388-      |      |      |      |
| 2017 | NUS | 2017_NY_ITH | 36 | 39-693                | 7.0  | 35.0 | 15.2 |
| 2017 | NUS | 2017_NY_ITH | 37 | NY09087-15-69-1124    | 6.4  | 10.0 | 1.9  |
| 2017 | NUS | 2017_NY_ITH | 38 | NY01016-AN            | 17.0 | 60.0 | 25.4 |
| 2017 | NUS | 2017_NY_ITH | 39 | NY09125-16-1034       | 8.0  | 50.0 | 9.4  |
| 2017 | NUS | 2017_NY_ITH | 40 | MO140304              | 11.2 | 25.0 | 4.8  |
| 2017 | NUS | 2017_NY_ITH | 41 | MO151323              | 4.8  | 10.0 | 1.7  |
| 2017 | NUS | 2017_NY_ITH | 42 | MO151031              | 13.0 | 25.0 | 5.2  |
| 2017 | NUS | 2017_NY_ITH | 43 | MO151826              | 5.8  | 20.0 | 3.1  |
| 2017 | NUS | 2017_NY_ITH | 44 | MO150133              | 7.6  | 10.0 | 2.8  |
| 2017 | NUS | 2017_NY_ITH | 45 | 0566A1-3-1-1-63       | 12.0 | 90.0 | 12.0 |
| 2017 | NUS | 2017_NY_ITH | 46 | 04620A1-1-7-4-10      | 8.2  | 20.0 | 5.0  |
| 2017 | NUS | 2017_NY_ITH | 47 | 0527A1-9-14-4-3-3     | 10.8 | 55.0 | 2.8  |
| 2017 | NUS | 2017_NY_ITH | 48 | 0762A1-2-8            | 6.0  | 50.0 | 3.3  |
| 2017 | NUS | 2017_NY_ITH | 49 | 07419A1-16-1-1-16-1-1 | 16.0 | 80.0 | 25.5 |
| 2017 | NUS | 2017_NY_ITH | 50 | LES15-5199            | 10.2 | 55.0 | 8.7  |
| 2017 | NUS | 2017_NY_ITH | 51 | LES15-7011            | 7.2  | 30.0 | 3.4  |
| 2017 | NUS | 2017_NY_ITH | 52 | LES15-5540            | 10.4 | 25.0 | 6.7  |
| 2017 | NUS | 2017_NY_ITH | 53 | LES15-5605            | 15.8 | 35.0 | 5.2  |
| 2017 | NUS | 2017_NY_ITH | 54 | LES15-7004            | 13.4 | 50.0 | 6.7  |
| 2017 | NUS | 2017_NY_ITH | 55 | U6714-B-041           | 11.4 | 65.0 | 19.4 |
| 2017 | NUS | 2017_NY_ITH | 56 | MI14R0008             | 13.6 | 60.0 | 17.2 |
| 2017 | NUS | 2017_NY_ITH | 57 | MI14R0009             | 20.8 | 60.0 | 16.9 |
| 2017 | NUS | 2017_NY_ITH | 58 | MI14R0421             | 10.6 | 40.0 | 7.7  |
| 2017 | NUS | 2017_NY_ITH | 59 | MI14R0267             | 11.8 | 35.0 | 9.2  |
| 2017 | NUS | 2017_NY_ITH | 60 | OH09-207-68           | 10.6 | 50.0 | 9.4  |

|      |     |                 |    |                    |      |      |    |
|------|-----|-----------------|----|--------------------|------|------|----|
| 2017 | NUS | 2017_MO_CO<br>L | 1  | TRUMAN             | 7.9  | 7.5  | NA |
| 2017 | NUS | 2017_MO_CO<br>L | 2  | ERNIE              | 9.9  | 12.5 | NA |
| 2017 | NUS | 2017_MO_CO<br>L | 3  | FREEDOM            | 20.0 | 7.5  | NA |
| 2017 | NUS | 2017_MO_CO<br>L | 4  | PIONEER2545        | 14.3 | 7.5  | NA |
| 2017 | NUS | 2017_MO_CO<br>L | 5  | VA11W-108PA        | 4.8  | 15.0 | NA |
| 2017 | NUS | 2017_MO_CO<br>L | 6  | VA09MAS1-12-5-1    | 8.8  | 7.5  | NA |
| 2017 | NUS | 2017_MO_CO<br>L | 7  | VA14FHB-29         | 7.6  | 10.0 | NA |
| 2017 | NUS | 2017_MO_CO<br>L | 8  | VA09MAS8-34-5-2    | 12.7 | 20.0 | NA |
| 2017 | NUS | 2017_MO_CO<br>L | 9  | VA09MAS3-34-2-1    | 12.5 | 17.5 | NA |
| 2017 | NUS | 2017_MO_CO<br>L | 10 | KY09C-0052-26-12-3 | 13.8 | 12.5 | NA |
| 2017 | NUS | 2017_MO_CO<br>L | 11 | X08C-1070-74-20-1  | 10.8 | 7.5  | NA |
| 2017 | NUS | 2017_MO_CO<br>L | 12 | KY09C-1245-100-1-3 | 11.3 | 10.0 | NA |
| 2017 | NUS | 2017_MO_CO<br>L | 13 | KY09C-0267-45-16-3 | 3.2  | 20.0 | NA |
| 2017 | NUS | 2017_MO_CO<br>L | 14 | X08C-1090-51-12-5  | 3.7  | 5.0  | NA |
| 2017 | NUS | 2017_MO_CO<br>L | 15 | OH12-195-22        | 10.2 | 5.0  | NA |
| 2017 | NUS | 2017_MO_CO<br>L | 16 | OH11-118-18        | 12.4 | 10.0 | NA |
| 2017 | NUS | 2017_MO_CO<br>L | 17 | OH12-133-74        | 5.4  | 15.0 | NA |
| 2017 | NUS | 2017_MO_CO<br>L | 18 | OH12-194-24        | 7.5  | 15.0 | NA |
| 2017 | NUS | 2017_MO_CO<br>L | 19 | OH13-16-25         | 7.5  | 7.5  | NA |
| 2017 | NUS | 2017_MO_CO<br>L | 20 | NE14538            | 9.5  | 10.0 | NA |
| 2017 | NUS | 2017_MO_CO<br>L | 21 | NE14606            | 8.4  | 5.0  | NA |
| 2017 | NUS | 2017_MO_CO<br>L | 22 | NE14696            | 10.4 | 10.0 | NA |
| 2017 | NUS | 2017_MO_CO<br>L | 23 | NI12702W           | 9.6  | 10.0 | NA |
| 2017 | NUS | 2017_MO_CO<br>L | 24 | NE15545            | 6.8  | 10.0 | NA |
| 2017 | NUS | 2017_MO_CO<br>L | 25 | KWS095             | 7.6  | 20.0 | NA |
| 2017 | NUS | 2017_MO_CO<br>L | 26 | KWS103             | 7.3  | 5.0  | NA |
| 2017 | NUS | 2017_MO_CO<br>L | 27 | KWS122             | 12.5 | 7.5  | NA |
| 2017 | NUS | 2017_MO_CO<br>L | 28 | KWS127             | 7.6  | 17.5 | NA |

|      |     |                 |    |                            |      |      |    |
|------|-----|-----------------|----|----------------------------|------|------|----|
| 2017 | NUS | 2017_MO_CO<br>L | 29 | KWS141                     | 12.8 | 5.0  | NA |
| 2017 | NUS | 2017_MO_CO<br>L | 30 | IL09-3264-T2               | 7.7  | 12.5 | NA |
| 2017 | NUS | 2017_MO_CO<br>L | 31 | IL12-21235                 | 7.5  | 5.0  | NA |
| 2017 | NUS | 2017_MO_CO<br>L | 32 | IL12-26004                 | 10.4 | 10.0 | NA |
| 2017 | NUS | 2017_MO_CO<br>L | 33 | IL13-451                   | 14.0 | 5.0  | NA |
| 2017 | NUS | 2017_MO_CO<br>L | 34 | IL13-20616                 | 8.9  | 10.0 | NA |
| 2017 | NUS | 2017_MO_CO<br>L | 35 | NY99056-161                | 7.4  | 5.0  | NA |
| 2017 | NUS | 2017_MO_CO<br>L | 36 | NYWHATFORD/7388-<br>39-693 | 8.2  | 5.0  | NA |
| 2017 | NUS | 2017_MO_CO<br>L | 37 | NY09087-15-69-1124         | 6.1  | 7.5  | NA |
| 2017 | NUS | 2017_MO_CO<br>L | 38 | NY01016-AN                 | 8.9  | 5.0  | NA |
| 2017 | NUS | 2017_MO_CO<br>L | 39 | NY09125-16-1034            | 6.2  | 15.0 | NA |
| 2017 | NUS | 2017_MO_CO<br>L | 40 | MO140304                   | 9.6  | 12.5 | NA |
| 2017 | NUS | 2017_MO_CO<br>L | 41 | MO151323                   | 10.0 | 7.5  | NA |
| 2017 | NUS | 2017_MO_CO<br>L | 42 | MO151031                   | 6.9  | 5.0  | NA |
| 2017 | NUS | 2017_MO_CO<br>L | 43 | MO151826                   | 4.9  | 7.5  | NA |
| 2017 | NUS | 2017_MO_CO<br>L | 44 | MO150133                   | 13.4 | 12.5 | NA |
| 2017 | NUS | 2017_MO_CO<br>L | 45 | 0566A1-3-1-1-63            | 9.3  | 20.0 | NA |
| 2017 | NUS | 2017_MO_CO<br>L | 46 | 04620A1-1-7-4-10           | 10.4 | 5.0  | NA |
| 2017 | NUS | 2017_MO_CO<br>L | 47 | 0527A1-9-14-4-3-3          | 18.0 | 10.0 | NA |
| 2017 | NUS | 2017_MO_CO<br>L | 48 | 0762A1-2-8                 | 8.8  | 22.5 | NA |
| 2017 | NUS | 2017_MO_CO<br>L | 49 | 07419A1-16-1-1-16-1-1      | 16.7 | 15.0 | NA |
| 2017 | NUS | 2017_MO_CO<br>L | 50 | LES15-5199                 | 13.5 | 20.0 | NA |
| 2017 | NUS | 2017_MO_CO<br>L | 51 | LES15-7011                 | 8.5  | 10.0 | NA |
| 2017 | NUS | 2017_MO_CO<br>L | 52 | LES15-5540                 | 6.7  | 15.0 | NA |
| 2017 | NUS | 2017_MO_CO<br>L | 53 | LES15-5605                 | 11.5 | 10.0 | NA |
| 2017 | NUS | 2017_MO_CO<br>L | 54 | LES15-7004                 | 13.2 | 7.5  | NA |
| 2017 | NUS | 2017_MO_CO<br>L | 55 | U6714-B-041                | 22.3 | 5.0  | NA |
| 2017 | NUS | 2017_MO_CO<br>L | 56 | MI14R0008                  | 13.1 | 7.5  | NA |



|      |     |                 |    |                                 |      |      |    |
|------|-----|-----------------|----|---------------------------------|------|------|----|
| 2017 | NUS | 2017_MO_CO<br>L | 57 | MI14R0009                       | 10.9 | 10.0 | NA |
| 2017 | NUS | 2017_MO_CO<br>L | 58 | MI14R0421                       | 13.3 | 12.5 | NA |
| 2017 | NUS | 2017_MO_CO<br>L | 59 | MI14R0267                       | 9.0  | 5.0  | NA |
| 2017 | NUS | 2017_MO_CO<br>L | 60 | OH09-207-68                     | 7.7  | 10.0 | NA |
| 2017 | NUS | 2017_NE_MEA     | 1  | TRUMAN                          | 17.4 | NA   | NA |
| 2017 | NUS | 2017_NE_MEA     | 2  | ERNIE                           | 37.9 | NA   | NA |
| 2017 | NUS | 2017_NE_MEA     | 3  | FREEDOM                         | 13.9 | NA   | NA |
| 2017 | NUS | 2017_NE_MEA     | 4  | PIONEER2545                     | 32.6 | NA   | NA |
| 2017 | NUS | 2017_NE_MEA     | 5  | VA11W-108PA                     | 37.8 | NA   | NA |
| 2017 | NUS | 2017_NE_MEA     | 6  | VA09MAS1-12-5-1                 | 20.1 | NA   | NA |
| 2017 | NUS | 2017_NE_MEA     | 7  | VA14FHB-29                      | 13.2 | NA   | NA |
| 2017 | NUS | 2017_NE_MEA     | 8  | VA09MAS8-34-5-2                 | 22.1 | NA   | NA |
| 2017 | NUS | 2017_NE_MEA     | 9  | VA09MAS3-34-2-1                 | 43.4 | NA   | NA |
| 2017 | NUS | 2017_NE_MEA     | 10 | KY09C-0052-26-12-3              | 36.1 | NA   | NA |
| 2017 | NUS | 2017_NE_MEA     | 11 | X08C-1070-74-20-1               | 25.8 | NA   | NA |
| 2017 | NUS | 2017_NE_MEA     | 12 | KY09C-1245-100-1-3              | 45.3 | NA   | NA |
| 2017 | NUS | 2017_NE_MEA     | 13 | KY09C-0267-45-16-3              | 24.9 | NA   | NA |
| 2017 | NUS | 2017_NE_MEA     | 14 | X08C-1090-51-12-5               | 16.7 | NA   | NA |
| 2017 | NUS | 2017_NE_MEA     | 15 | OH12-195-22                     | 23.4 | NA   | NA |
| 2017 | NUS | 2017_NE_MEA     | 16 | OH11-118-18                     | 10.7 | NA   | NA |
| 2017 | NUS | 2017_NE_MEA     | 17 | OH12-133-74                     | 19.5 | NA   | NA |
| 2017 | NUS | 2017_NE_MEA     | 18 | OH12-194-24                     | 29.9 | NA   | NA |
| 2017 | NUS | 2017_NE_MEA     | 19 | OH13-16-25                      | 36.0 | NA   | NA |
| 2017 | NUS | 2017_NE_MEA     | 20 | NE14538                         | 14.2 | NA   | NA |
| 2017 | NUS | 2017_NE_MEA     | 21 | NE14606                         | 27.2 | NA   | NA |
| 2017 | NUS | 2017_NE_MEA     | 22 | NE14696                         | 7.4  | NA   | NA |
| 2017 | NUS | 2017_NE_MEA     | 23 | NI12702W                        | 10.7 | NA   | NA |
| 2017 | NUS | 2017_NE_MEA     | 24 | NE15545                         | 12.2 | NA   | NA |
| 2017 | NUS | 2017_NE_MEA     | 25 | KWS095                          | 21.3 | NA   | NA |
| 2017 | NUS | 2017_NE_MEA     | 26 | KWS103                          | 27.9 | NA   | NA |
| 2017 | NUS | 2017_NE_MEA     | 27 | KWS122                          | 18.8 | NA   | NA |
| 2017 | NUS | 2017_NE_MEA     | 28 | KWS127                          | 28.6 | NA   | NA |
| 2017 | NUS | 2017_NE_MEA     | 29 | KWS141                          | 33.1 | NA   | NA |
| 2017 | NUS | 2017_NE_MEA     | 30 | IL09-3264-T2                    | 26.6 | NA   | NA |
| 2017 | NUS | 2017_NE_MEA     | 31 | IL12-21235                      | 57.4 | NA   | NA |
| 2017 | NUS | 2017_NE_MEA     | 32 | IL12-26004                      | 36.9 | NA   | NA |
| 2017 | NUS | 2017_NE_MEA     | 33 | IL13-451                        | 38.7 | NA   | NA |
| 2017 | NUS | 2017_NE_MEA     | 34 | IL13-20616                      | 44.0 | NA   | NA |
| 2017 | NUS | 2017_NE_MEA     | 35 | NY99056-161<br>NYWHATFORD/7388- | 18.8 | NA   | NA |
| 2017 | NUS | 2017_NE_MEA     | 36 | 39-693                          | 11.9 | NA   | NA |
| 2017 | NUS | 2017_NE_MEA     | 37 | NY09087-15-69-1124              | 22.8 | NA   | NA |
| 2017 | NUS | 2017_NE_MEA     | 38 | NY01016-AN                      | 22.7 | NA   | NA |
| 2017 | NUS | 2017_NE_MEA     | 39 | NY09125-16-1034                 | 34.6 | NA   | NA |
| 2017 | NUS | 2017_NE_MEA     | 40 | MO140304                        | 22.1 | NA   | NA |
| 2017 | NUS | 2017_NE_MEA     | 41 | MO151323                        | 34.3 | NA   | NA |
| 2017 | NUS | 2017_NE_MEA     | 42 | MO151031                        | 24.7 | NA   | NA |

|      |     |             |    |                       |      |      |     |
|------|-----|-------------|----|-----------------------|------|------|-----|
| 2017 | NUS | 2017_NE_MEA | 43 | MO151826              | 17.7 | NA   | NA  |
| 2017 | NUS | 2017_NE_MEA | 44 | MO150133              | 41.7 | NA   | NA  |
| 2017 | NUS | 2017_NE_MEA | 45 | 0566A1-3-1-1-63       | 44.7 | NA   | NA  |
| 2017 | NUS | 2017_NE_MEA | 46 | 04620A1-1-7-4-10      | 30.3 | NA   | NA  |
| 2017 | NUS | 2017_NE_MEA | 47 | 0527A1-9-14-4-3-3     | 36.1 | NA   | NA  |
| 2017 | NUS | 2017_NE_MEA | 48 | 0762A1-2-8            | 51.6 | NA   | NA  |
| 2017 | NUS | 2017_NE_MEA | 49 | 07419A1-16-1-1-16-1-1 | 35.3 | NA   | NA  |
| 2017 | NUS | 2017_NE_MEA | 50 | LES15-5199            | 35.8 | NA   | NA  |
| 2017 | NUS | 2017_NE_MEA | 51 | LES15-7011            | 62.2 | NA   | NA  |
| 2017 | NUS | 2017_NE_MEA | 52 | LES15-5540            | 51.2 | NA   | NA  |
| 2017 | NUS | 2017_NE_MEA | 53 | LES15-5605            | 66.5 | NA   | NA  |
| 2017 | NUS | 2017_NE_MEA | 54 | LES15-7004            | 43.3 | NA   | NA  |
| 2017 | NUS | 2017_NE_MEA | 55 | U6714-B-041           | 39.8 | NA   | NA  |
| 2017 | NUS | 2017_NE_MEA | 56 | MI14R0008             | 48.2 | NA   | NA  |
| 2017 | NUS | 2017_NE_MEA | 57 | MI14R0009             | 35.2 | NA   | NA  |
| 2017 | NUS | 2017_NE_MEA | 58 | MI14R0421             | 20.8 | NA   | NA  |
| 2017 | NUS | 2017_NE_MEA | 59 | MI14R0267             | 25.9 | NA   | NA  |
| 2017 | NUS | 2017_NE_MEA | 60 | OH09-207-68           | 44.9 | NA   | NA  |
| 2018 | NUS | 2018_IL_URB | 1  | TRUMAN                | 7.0  | 1.3  | 0.4 |
| 2018 | NUS | 2018_IL_URB | 2  | ERNIE                 | 60.0 | 7.7  | 0.6 |
| 2018 | NUS | 2018_IL_URB | 3  | FREEDOM               | 37.0 | 28.3 | 1.5 |
| 2018 | NUS | 2018_IL_URB | 4  | PIONEER2545           | 63.0 | 36.7 | 4.3 |
| 2018 | NUS | 2018_IL_URB | 5  | IL13-20616            | 13.0 | 5.7  | 0.7 |
| 2018 | NUS | 2018_IL_URB | 6  | IL14-11718            | 40.0 | 11.7 | 1.1 |
| 2018 | NUS | 2018_IL_URB | 7  | IL14-11848            | 7.0  | 12.0 | 0.6 |
| 2018 | NUS | 2018_IL_URB | 8  | IL14-28462            | 43.0 | 18.4 | 0.2 |
| 2018 | NUS | 2018_IL_URB | 9  | IL14-DC-64-95-118     | 27.0 | 11.0 | 0.8 |
| 2018 | NUS | 2018_IL_URB | 10 | VA15W-68              | 57.0 | 33.3 | 3.1 |
| 2018 | NUS | 2018_IL_URB | 11 | VA16W-29              | 57.0 | 20.0 | 2.6 |
| 2018 | NUS | 2018_IL_URB | 12 | VA16W-148             | 27.0 | 36.7 | 2.5 |
| 2018 | NUS | 2018_IL_URB | 13 | VA16W-149             | 50.0 | 26.0 | 0.8 |
| 2018 | NUS | 2018_IL_URB | 14 | 13VA-FHB-DH252        | 77.0 | 8.3  | 0.6 |
| 2018 | NUS | 2018_IL_URB | 15 | KY06C-1195-37-2-5     | 37.0 | 18.3 | 1.5 |
| 2018 | NUS | 2018_IL_URB | 16 | X08C-1181-61-15-5     | 47.0 | 40.0 | 1.7 |
| 2018 | NUS | 2018_IL_URB | 17 | KY06C-1178-16-10-3    | 33.0 | 11.0 | 1.3 |
| 2018 | NUS | 2018_IL_URB | 18 | KY07C-1145-94-12-5    | 17.0 | 9.3  | 0.9 |
| 2018 | NUS | 2018_IL_URB | 19 | X08C-1077-11-18-3     | 20.0 | 9.3  | 0.9 |
| 2018 | NUS | 2018_IL_URB | 20 | NY11013-10-72-1314    | 40.0 | 35.0 | 0.7 |
| 2018 | NUS | 2018_IL_URB | 21 | NY11013-10-15-1312    | 70.0 | 30.0 | 0.6 |
| 2018 | NUS | 2018_IL_URB | 22 | NY02008-807           | 30.0 | 18.3 | 1.8 |
| 2018 | NUS | 2018_IL_URB | 23 | NY09095-16-928        | 10.0 | 10.0 | 1.3 |
| 2018 | NUS | 2018_IL_URB | 24 | NY02007-1206          | 40.0 | 16.0 | 3.1 |
| 2018 | NUS | 2018_IL_URB | 25 | KWS152                | 53.0 | 45.0 | 1.7 |
| 2018 | NUS | 2018_IL_URB | 26 | KWS149                | 57.0 | 9.3  | 2.0 |
| 2018 | NUS | 2018_IL_URB | 27 | KWS192                | 33.0 | 12.7 | 1.5 |
| 2018 | NUS | 2018_IL_URB | 28 | KWS191                | 43.0 | 35.0 | 2.7 |
| 2018 | NUS | 2018_IL_URB | 29 | KWS193                | 43.0 | 6.3  | 1.0 |
| 2018 | NUS | 2018_IL_URB | 30 | MI14R0267             | 40.0 | 6.0  | 1.5 |
| 2018 | NUS | 2018_IL_URB | 31 | MI14W0190             | 13.0 | 2.7  | 0.8 |

|      |     |             |     |                       |      |      |      |
|------|-----|-------------|-----|-----------------------|------|------|------|
| 2018 | NUS | 2018_IL_URB | 32  | MI14W0906             | 57.0 | 73.3 | 2.4  |
| 2018 | NUS | 2018_IL_URB | 33  | MI14R1145             | 17.0 | 23.3 | 1.7  |
| 2018 | NUS | 2018_IL_URB | 34  | MO131753              | 30.0 | 9.7  | 0.3  |
| 2018 | NUS | 2018_IL_URB | 35  | MO151163              | 20.0 | 1.4  | 0.4  |
| 2018 | NUS | 2018_IL_URB | 36  | MO151126              | 33.0 | 8.3  | 1.0  |
| 2018 | NUS | 2018_IL_URB | 37  | MO160132              | 30.0 | 1.0  | 0.5  |
| 2018 | NUS | 2018_IL_URB | 38  | MO160140              | 43.0 | 5.3  | 0.6  |
| 2018 | NUS | 2018_IL_URB | 39  | 0566A1-3-1-1-63       | 30.0 | 56.7 | 1.1  |
| 2018 | NUS | 2018_IL_URB | 40  | 04620A1-1-7-4-10      | 60.0 | 20.0 | 2.4  |
| 2018 | NUS | 2018_IL_URB | 41  | 0527A1-9-14-4-3-3     | 7.0  | 14.9 | 0.3  |
| 2018 | NUS | 2018_IL_URB | 42  | 0762A1-2-8            | 10.0 | 8.7  | 0.2  |
| 2018 | NUS | 2018_IL_URB | 43  | 07419A1-16-1-1-16-1-1 | 57.0 | 26.7 | 1.5  |
| 2018 | NUS | 2018_IL_URB | 44  | OH12-194-24           | 47.0 | 13.3 | 2.2  |
| 2018 | NUS | 2018_IL_URB | 45  | OH12-195-22           | 33.0 | 20.0 | 0.9  |
| 2018 | NUS | 2018_IL_URB | 46  | OH13-314-18           | 67.0 | 25.0 | 1.8  |
| 2018 | NUS | 2018_IL_URB | 47  | NE13604               | 40.0 | 10.7 | 1.1  |
| 2018 | NUS | 2018_IL_URB | 48  | NW13493               | 77.0 | 23.3 | 2.0  |
| 2018 | NUS | 2018_IL_URB | 49  | NE13515               | 63.0 | 33.3 | 2.1  |
| 2018 | NUS | 2018_IL_URB | 50  | NE14494               | 50.0 | 17.7 | 1.4  |
| 2018 | NUS | 2018_IL_URB | 51  | NE14696               | 43.0 | 21.0 | 0.6  |
| 2018 | NUS | 2018_IL_URB | 52  | LES168062             | 57.0 | 7.3  | 1.3  |
| 2018 | NUS | 2018_IL_URB | 53  | LES167062             | 57.0 | 16.7 | 1.5  |
| 2018 | NUS | 2018_IL_URB | 54  | LES167906             | 47.0 | 31.7 | 2.4  |
| 2018 | NUS | 2018_IL_URB | 55  | LES167499             | 67.0 | 26.7 | 2.1  |
| 2018 | NUS | 2018_IL_URB | 500 | PIONEER25R47          | 50.0 | 28.3 | 0.9  |
| 2018 | NUS | 2018_IL_URB | 501 | IL07-4415             | 10.0 | 3.7  | 1.3  |
| 2018 | NUS | 2018_IL_URB | 502 | IL02-18228            | 10.0 | 1.0  | 42.3 |
| 2018 | NUS | 2018_IN_LAY | 1   | TRUMAN                | 25.0 | NA   | NA   |
| 2018 | NUS | 2018_IN_LAY | 2   | ERNIE                 | 40.0 | NA   | NA   |
| 2018 | NUS | 2018_IN_LAY | 3   | FREEDOM               | 30.0 | NA   | NA   |
| 2018 | NUS | 2018_IN_LAY | 4   | PIONEER2545           | 50.0 | NA   | NA   |
| 2018 | NUS | 2018_IN_LAY | 5   | IL13-20616            | 15.0 | NA   | NA   |
| 2018 | NUS | 2018_IN_LAY | 6   | IL14-11718            | 15.0 | NA   | NA   |
| 2018 | NUS | 2018_IN_LAY | 7   | IL14-11848            | 10.0 | NA   | NA   |
| 2018 | NUS | 2018_IN_LAY | 8   | IL14-28462            | 10.0 | NA   | NA   |
| 2018 | NUS | 2018_IN_LAY | 9   | IL14-DC-64-95-118     | 20.0 | NA   | NA   |
| 2018 | NUS | 2018_IN_LAY | 10  | VA15W-68              | 50.0 | NA   | NA   |
| 2018 | NUS | 2018_IN_LAY | 11  | VA16W-29              | 55.0 | NA   | NA   |
| 2018 | NUS | 2018_IN_LAY | 12  | VA16W-148             | 30.0 | NA   | NA   |
| 2018 | NUS | 2018_IN_LAY | 13  | VA16W-149             | 40.0 | NA   | NA   |
| 2018 | NUS | 2018_IN_LAY | 14  | 13VA-FHB-DH252        | 25.0 | NA   | NA   |
| 2018 | NUS | 2018_IN_LAY | 15  | KY06C-1195-37-2-5     | 55.0 | NA   | NA   |
| 2018 | NUS | 2018_IN_LAY | 16  | X08C-1181-61-15-5     | 30.0 | NA   | NA   |
| 2018 | NUS | 2018_IN_LAY | 17  | KY06C-1178-16-10-3    | 45.0 | NA   | NA   |
| 2018 | NUS | 2018_IN_LAY | 18  | KY07C-1145-94-12-5    | 20.0 | NA   | NA   |
| 2018 | NUS | 2018_IN_LAY | 19  | X08C-1077-11-18-3     | 30.0 | NA   | NA   |
| 2018 | NUS | 2018_IN_LAY | 20  | NY11013-10-72-1314    | 30.0 | NA   | NA   |
| 2018 | NUS | 2018_IN_LAY | 21  | NY11013-10-15-1312    | 65.0 | NA   | NA   |
| 2018 | NUS | 2018_IN_LAY | 22  | NY02008-807           | 20.0 | NA   | NA   |

|      |     |             |    |                       |      |    |      |
|------|-----|-------------|----|-----------------------|------|----|------|
| 2018 | NUS | 2018_IN_LAY | 23 | NY09095-16-928        | 25.0 | NA | NA   |
| 2018 | NUS | 2018_IN_LAY | 24 | NY02007-1206          | 60.0 | NA | NA   |
| 2018 | NUS | 2018_IN_LAY | 25 | KWS152                | 55.0 | NA | NA   |
| 2018 | NUS | 2018_IN_LAY | 26 | KWS149                | 35.0 | NA | NA   |
| 2018 | NUS | 2018_IN_LAY | 27 | KWS192                | 50.0 | NA | NA   |
| 2018 | NUS | 2018_IN_LAY | 28 | KWS191                | 40.0 | NA | NA   |
| 2018 | NUS | 2018_IN_LAY | 29 | KWS193                | 25.0 | NA | NA   |
| 2018 | NUS | 2018_IN_LAY | 30 | MI14R0267             | 30.0 | NA | NA   |
| 2018 | NUS | 2018_IN_LAY | 31 | MI14W0190             | 20.0 | NA | NA   |
| 2018 | NUS | 2018_IN_LAY | 32 | MI14W0906             | 60.0 | NA | NA   |
| 2018 | NUS | 2018_IN_LAY | 33 | MI14R1145             | 25.0 | NA | NA   |
| 2018 | NUS | 2018_IN_LAY | 34 | MO131753              | 25.0 | NA | NA   |
| 2018 | NUS | 2018_IN_LAY | 35 | MO151163              | 15.0 | NA | NA   |
| 2018 | NUS | 2018_IN_LAY | 36 | MO151126              | 20.0 | NA | NA   |
| 2018 | NUS | 2018_IN_LAY | 37 | MO160132              | 15.0 | NA | NA   |
| 2018 | NUS | 2018_IN_LAY | 38 | MO160140              | 20.0 | NA | NA   |
| 2018 | NUS | 2018_IN_LAY | 39 | 0566A1-3-1-1-63       | 25.0 | NA | NA   |
| 2018 | NUS | 2018_IN_LAY | 40 | 04620A1-1-7-4-10      | 30.0 | NA | NA   |
| 2018 | NUS | 2018_IN_LAY | 41 | 0527A1-9-14-4-3-3     | 10.0 | NA | NA   |
| 2018 | NUS | 2018_IN_LAY | 42 | 0762A1-2-8            | 10.0 | NA | NA   |
| 2018 | NUS | 2018_IN_LAY | 43 | 07419A1-16-1-1-16-1-1 | 40.0 | NA | NA   |
| 2018 | NUS | 2018_IN_LAY | 44 | OH12-194-24           | 50.0 | NA | NA   |
| 2018 | NUS | 2018_IN_LAY | 45 | OH12-195-22           | 30.0 | NA | NA   |
| 2018 | NUS | 2018_IN_LAY | 46 | OH13-314-18           | 50.0 | NA | NA   |
| 2018 | NUS | 2018_IN_LAY | 47 | NE13604               | 50.0 | NA | NA   |
| 2018 | NUS | 2018_IN_LAY | 48 | NW13493               | 65.0 | NA | NA   |
| 2018 | NUS | 2018_IN_LAY | 49 | NE13515               | 50.0 | NA | NA   |
| 2018 | NUS | 2018_IN_LAY | 50 | NE14494               | 60.0 | NA | NA   |
| 2018 | NUS | 2018_IN_LAY | 51 | NE14696               | 50.0 | NA | NA   |
| 2018 | NUS | 2018_IN_LAY | 52 | LES168062             | 25.0 | NA | NA   |
| 2018 | NUS | 2018_IN_LAY | 53 | LES167062             | 55.0 | NA | NA   |
| 2018 | NUS | 2018_IN_LAY | 54 | LES167906             | 55.0 | NA | NA   |
| 2018 | NUS | 2018_IN_LAY | 55 | LES167499             | 60.0 | NA | NA   |
| 2018 | NUS | 2018_IN_WLA | 1  | TRUMAN                | 15.0 | NA | 2.8  |
| 2018 | NUS | 2018_IN_WLA | 2  | ERNIE                 | 12.0 | NA | 1.7  |
| 2018 | NUS | 2018_IN_WLA | 3  | FREEDOM               | 20.0 | NA | 8.5  |
| 2018 | NUS | 2018_IN_WLA | 4  | PIONEER2545           | 54.0 | NA | 4.2  |
| 2018 | NUS | 2018_IN_WLA | 5  | IL13-20616            | 8.0  | NA | 1.1  |
| 2018 | NUS | 2018_IN_WLA | 6  | IL14-11718            | 5.0  | NA | 2.7  |
| 2018 | NUS | 2018_IN_WLA | 7  | IL14-11848            | 5.0  | NA | 0.7  |
| 2018 | NUS | 2018_IN_WLA | 8  | IL14-28462            | 17.0 | NA | 4.2  |
| 2018 | NUS | 2018_IN_WLA | 9  | IL14-DC-64-95-118     | 11.0 | NA | 1.9  |
| 2018 | NUS | 2018_IN_WLA | 10 | VA15W-68              | 44.0 | NA | 4.4  |
| 2018 | NUS | 2018_IN_WLA | 11 | VA16W-29              | 49.0 | NA | 1.5  |
| 2018 | NUS | 2018_IN_WLA | 12 | VA16W-148             | 32.0 | NA | 10.8 |
| 2018 | NUS | 2018_IN_WLA | 13 | VA16W-149             | 50.0 | NA | 6.1  |
| 2018 | NUS | 2018_IN_WLA | 14 | 13VA-FHB-DH252        | 27.0 | NA | 2.8  |
| 2018 | NUS | 2018_IN_WLA | 15 | KY06C-1195-37-2-5     | 24.0 | NA | 1.5  |
| 2018 | NUS | 2018_IN_WLA | 16 | X08C-1181-61-15-5     | 27.0 | NA | 2.1  |

|      |     |             |    |                       |      |      |      |
|------|-----|-------------|----|-----------------------|------|------|------|
| 2018 | NUS | 2018_IN_WLA | 17 | KY06C-1178-16-10-3    | 12.0 | NA   | 5.1  |
| 2018 | NUS | 2018_IN_WLA | 18 | KY07C-1145-94-12-5    | 17.0 | NA   | 1.0  |
| 2018 | NUS | 2018_IN_WLA | 19 | X08C-1077-11-18-3     | 14.0 | NA   | 2.7  |
| 2018 | NUS | 2018_IN_WLA | 20 | NY11013-10-72-1314    | 4.0  | NA   | 0.6  |
| 2018 | NUS | 2018_IN_WLA | 21 | NY11013-10-15-1312    | 5.0  | NA   | 0.8  |
| 2018 | NUS | 2018_IN_WLA | 22 | NY02008-807           | 15.0 | NA   | 1.7  |
| 2018 | NUS | 2018_IN_WLA | 23 | NY09095-16-928        | 27.0 | NA   | 6.3  |
| 2018 | NUS | 2018_IN_WLA | 24 | NY02007-1206          | 4.0  | NA   | 1.5  |
| 2018 | NUS | 2018_IN_WLA | 25 | KWS152                | 29.0 | NA   | 1.6  |
| 2018 | NUS | 2018_IN_WLA | 26 | KWS149                | 39.0 | NA   | 2.2  |
| 2018 | NUS | 2018_IN_WLA | 27 | KWS192                | 20.0 | NA   | 0.7  |
| 2018 | NUS | 2018_IN_WLA | 28 | KWS191                | 8.0  | NA   | 3.4  |
| 2018 | NUS | 2018_IN_WLA | 29 | KWS193                | 25.0 | NA   | 4.3  |
| 2018 | NUS | 2018_IN_WLA | 30 | MI14R0267             | 9.0  | NA   | 3.6  |
| 2018 | NUS | 2018_IN_WLA | 31 | MI14W0190             | 8.0  | NA   | 1.2  |
| 2018 | NUS | 2018_IN_WLA | 32 | MI14W0906             | 82.0 | NA   | 1.6  |
| 2018 | NUS | 2018_IN_WLA | 33 | MI14R1145             | 24.0 | NA   | 3.7  |
| 2018 | NUS | 2018_IN_WLA | 34 | MO131753              | 35.0 | NA   | 2.4  |
| 2018 | NUS | 2018_IN_WLA | 35 | MO151163              | 7.0  | NA   | 1.2  |
| 2018 | NUS | 2018_IN_WLA | 36 | MO151126              | 15.0 | NA   | 2.2  |
| 2018 | NUS | 2018_IN_WLA | 37 | MO160132              | 11.0 | NA   | 0.9  |
| 2018 | NUS | 2018_IN_WLA | 38 | MO160140              | 9.0  | NA   | 1.6  |
| 2018 | NUS | 2018_IN_WLA | 39 | 0566A1-3-1-1-63       | 32.0 | NA   | 2.1  |
| 2018 | NUS | 2018_IN_WLA | 40 | 04620A1-1-7-4-10      | 28.0 | NA   | 6.7  |
| 2018 | NUS | 2018_IN_WLA | 41 | 0527A1-9-14-4-3-3     | 13.0 | NA   | 4.3  |
| 2018 | NUS | 2018_IN_WLA | 42 | 0762A1-2-8            | 21.0 | NA   | 2.3  |
| 2018 | NUS | 2018_IN_WLA | 43 | 07419A1-16-1-1-16-1-1 | 18.0 | NA   | 1.4  |
| 2018 | NUS | 2018_IN_WLA | 44 | OH12-194-24           | 46.0 | NA   | 5.6  |
| 2018 | NUS | 2018_IN_WLA | 45 | OH12-195-22           | 44.0 | NA   | 11.6 |
| 2018 | NUS | 2018_IN_WLA | 46 | OH13-314-18           | 71.0 | NA   | 3.9  |
| 2018 | NUS | 2018_IN_WLA | 47 | NE13604               | 39.0 | NA   | 5.1  |
| 2018 | NUS | 2018_IN_WLA | 48 | NW13493               | 33.0 | NA   | 3.3  |
| 2018 | NUS | 2018_IN_WLA | 49 | NE13515               | 46.0 | NA   | 7.4  |
| 2018 | NUS | 2018_IN_WLA | 50 | NE14494               | 43.0 | NA   | 7.2  |
| 2018 | NUS | 2018_IN_WLA | 51 | NE14696               | 26.0 | NA   | 6.7  |
| 2018 | NUS | 2018_IN_WLA | 52 | LES168062             | 27.0 | NA   | 1.9  |
| 2018 | NUS | 2018_IN_WLA | 53 | LES167062             | 44.0 | NA   | 2.3  |
| 2018 | NUS | 2018_IN_WLA | 54 | LES167906             | 50.0 | NA   | 8.6  |
| 2018 | NUS | 2018_IN_WLA | 55 | LES167499             | 45.0 | NA   | 3.8  |
| 2018 | NUS | 2018_KY_LEX | 1  | TRUMAN                | NA   | 12.5 | 6.0  |
| 2018 | NUS | 2018_KY_LEX | 2  | ERNIE                 | NA   | 10.0 | 4.0  |
| 2018 | NUS | 2018_KY_LEX | 3  | FREEDOM               | NA   | 12.5 | 7.2  |
| 2018 | NUS | 2018_KY_LEX | 4  | PIONEER2545           | NA   | 15.0 | 7.2  |
| 2018 | NUS | 2018_KY_LEX | 5  | IL13-20616            | NA   | 12.5 | 3.0  |
| 2018 | NUS | 2018_KY_LEX | 6  | IL14-11718            | NA   | 12.5 | 3.9  |
| 2018 | NUS | 2018_KY_LEX | 7  | IL14-11848            | NA   | 7.5  | 1.4  |
| 2018 | NUS | 2018_KY_LEX | 8  | IL14-28462            | NA   | 5.0  | 3.0  |
| 2018 | NUS | 2018_KY_LEX | 9  | IL14-DC-64-95-118     | NA   | 5.0  | 2.7  |
| 2018 | NUS | 2018_KY_LEX | 10 | VA15W-68              | NA   | 22.5 | 10.3 |

|      |     |             |    |                       |      |      |      |
|------|-----|-------------|----|-----------------------|------|------|------|
| 2018 | NUS | 2018_KY_LEX | 11 | VA16W-29              | NA   | 15.0 | 7.0  |
| 2018 | NUS | 2018_KY_LEX | 12 | VA16W-148             | NA   | 22.5 | 9.5  |
| 2018 | NUS | 2018_KY_LEX | 13 | VA16W-149             | NA   | 35.0 | 5.1  |
| 2018 | NUS | 2018_KY_LEX | 14 | 13VA-FHB-DH252        | NA   | 25.0 | 8.8  |
| 2018 | NUS | 2018_KY_LEX | 15 | KY06C-1195-37-2-5     | NA   | 10.0 | 6.5  |
| 2018 | NUS | 2018_KY_LEX | 16 | X08C-1181-61-15-5     | NA   | 20.0 | 5.2  |
| 2018 | NUS | 2018_KY_LEX | 17 | KY06C-1178-16-10-3    | NA   | 5.0  | 3.9  |
| 2018 | NUS | 2018_KY_LEX | 18 | KY07C-1145-94-12-5    | NA   | 12.5 | 4.1  |
| 2018 | NUS | 2018_KY_LEX | 19 | X08C-1077-11-18-3     | NA   | 5.0  | 3.5  |
| 2018 | NUS | 2018_KY_LEX | 20 | NY11013-10-72-1314    | NA   | 30.0 | 6.1  |
| 2018 | NUS | 2018_KY_LEX | 21 | NY11013-10-15-1312    | NA   | 17.5 | 6.9  |
| 2018 | NUS | 2018_KY_LEX | 22 | NY02008-807           | NA   | 15.0 | 13.1 |
| 2018 | NUS | 2018_KY_LEX | 23 | NY09095-16-928        | NA   | 5.0  | 4.3  |
| 2018 | NUS | 2018_KY_LEX | 24 | NY02007-1206          | NA   | 22.5 | 13.2 |
| 2018 | NUS | 2018_KY_LEX | 25 | KWS152                | NA   | 25.0 | 9.3  |
| 2018 | NUS | 2018_KY_LEX | 26 | KWS149                | NA   | 12.5 | 3.6  |
| 2018 | NUS | 2018_KY_LEX | 27 | KWS192                | NA   | 7.5  | 2.7  |
| 2018 | NUS | 2018_KY_LEX | 28 | KWS191                | NA   | 15.0 | 6.9  |
| 2018 | NUS | 2018_KY_LEX | 29 | KWS193                | NA   | 7.5  | 5.3  |
| 2018 | NUS | 2018_KY_LEX | 30 | MI14R0267             | NA   | 7.5  | 4.2  |
| 2018 | NUS | 2018_KY_LEX | 31 | MI14W0190             | NA   | 5.0  | 7.1  |
| 2018 | NUS | 2018_KY_LEX | 32 | MI14W0906             | NA   | 40.0 | 8.5  |
| 2018 | NUS | 2018_KY_LEX | 33 | MI14R1145             | NA   | 10.0 | 6.3  |
| 2018 | NUS | 2018_KY_LEX | 34 | MO131753              | NA   | 7.5  | 4.0  |
| 2018 | NUS | 2018_KY_LEX | 35 | MO151163              | NA   | 10.0 | 2.6  |
| 2018 | NUS | 2018_KY_LEX | 36 | MO151126              | NA   | 5.0  | 0.6  |
| 2018 | NUS | 2018_KY_LEX | 37 | MO160132              | NA   | 5.0  | 4.4  |
| 2018 | NUS | 2018_KY_LEX | 38 | MO160140              | NA   | 10.0 | 6.6  |
| 2018 | NUS | 2018_KY_LEX | 39 | 0566A1-3-1-1-63       | NA   | 37.5 | 5.8  |
| 2018 | NUS | 2018_KY_LEX | 40 | 04620A1-1-7-4-10      | NA   | 10.0 | 5.1  |
| 2018 | NUS | 2018_KY_LEX | 41 | 0527A1-9-14-4-3-3     | NA   | 7.5  | 3.7  |
| 2018 | NUS | 2018_KY_LEX | 42 | 0762A1-2-8            | NA   | 22.5 | 4.0  |
| 2018 | NUS | 2018_KY_LEX | 43 | 07419A1-16-1-1-16-1-1 | NA   | 17.5 | 5.7  |
| 2018 | NUS | 2018_KY_LEX | 44 | OH12-194-24           | NA   | 15.0 | 7.5  |
| 2018 | NUS | 2018_KY_LEX | 45 | OH12-195-22           | NA   | 17.5 | 5.7  |
| 2018 | NUS | 2018_KY_LEX | 46 | OH13-314-18           | NA   | 35.0 | 7.0  |
| 2018 | NUS | 2018_KY_LEX | 47 | NE13604               | NA   | 25.0 | 7.8  |
| 2018 | NUS | 2018_KY_LEX | 48 | NW13493               | NA   | 7.5  | 5.0  |
| 2018 | NUS | 2018_KY_LEX | 49 | NE13515               | NA   | 22.5 | 5.1  |
| 2018 | NUS | 2018_KY_LEX | 50 | NE14494               | NA   | 20.0 | 6.7  |
| 2018 | NUS | 2018_KY_LEX | 51 | NE14696               | NA   | 10.0 | 7.0  |
| 2018 | NUS | 2018_KY_LEX | 52 | LES168062             | NA   | 7.5  | 2.1  |
| 2018 | NUS | 2018_KY_LEX | 53 | LES167062             | NA   | 12.5 | 3.9  |
| 2018 | NUS | 2018_KY_LEX | 54 | LES167906             | NA   | 12.5 | 8.6  |
| 2018 | NUS | 2018_KY_LEX | 55 | LES167499             | NA   | 40.0 | 6.6  |
| 2018 | NUS | 2018_MI_ELA | 1  | TRUMAN                | 13.3 | NA   | NA   |
| 2018 | NUS | 2018_MI_ELA | 2  | ERNIE                 | 26.7 | NA   | NA   |
| 2018 | NUS | 2018_MI_ELA | 3  | FREEDOM               | 21.7 | NA   | NA   |
| 2018 | NUS | 2018_MI_ELA | 4  | PIONEER2545           | 58.3 | NA   | NA   |

|      |     |             |    |                       |      |    |    |
|------|-----|-------------|----|-----------------------|------|----|----|
| 2018 | NUS | 2018_MI_ELA | 5  | IL13-20616            | 26.7 | NA | NA |
| 2018 | NUS | 2018_MI_ELA | 6  | IL14-11718            | 33.3 | NA | NA |
| 2018 | NUS | 2018_MI_ELA | 7  | IL14-11848            | 23.3 | NA | NA |
| 2018 | NUS | 2018_MI_ELA | 8  | IL14-28462            | 18.3 | NA | NA |
| 2018 | NUS | 2018_MI_ELA | 9  | IL14-DC-64-95-118     | 43.3 | NA | NA |
| 2018 | NUS | 2018_MI_ELA | 10 | VA15W-68              | 40.0 | NA | NA |
| 2018 | NUS | 2018_MI_ELA | 11 | VA16W-29              | 20.0 | NA | NA |
| 2018 | NUS | 2018_MI_ELA | 12 | VA16W-148             | 33.3 | NA | NA |
| 2018 | NUS | 2018_MI_ELA | 13 | VA16W-149             | 23.3 | NA | NA |
| 2018 | NUS | 2018_MI_ELA | 14 | 13VA-FHB-DH252        | 30.0 | NA | NA |
| 2018 | NUS | 2018_MI_ELA | 15 | KY06C-1195-37-2-5     | 25.0 | NA | NA |
| 2018 | NUS | 2018_MI_ELA | 16 | X08C-1181-61-15-5     | 41.7 | NA | NA |
| 2018 | NUS | 2018_MI_ELA | 17 | KY06C-1178-16-10-3    | 23.3 | NA | NA |
| 2018 | NUS | 2018_MI_ELA | 18 | KY07C-1145-94-12-5    | 28.3 | NA | NA |
| 2018 | NUS | 2018_MI_ELA | 19 | X08C-1077-11-18-3     | 25.0 | NA | NA |
| 2018 | NUS | 2018_MI_ELA | 20 | NY11013-10-72-1314    | 50.0 | NA | NA |
| 2018 | NUS | 2018_MI_ELA | 21 | NY11013-10-15-1312    | 45.0 | NA | NA |
| 2018 | NUS | 2018_MI_ELA | 22 | NY02008-807           | 18.3 | NA | NA |
| 2018 | NUS | 2018_MI_ELA | 23 | NY09095-16-928        | 21.7 | NA | NA |
| 2018 | NUS | 2018_MI_ELA | 24 | NY02007-1206          | 68.3 | NA | NA |
| 2018 | NUS | 2018_MI_ELA | 25 | KWS152                | 63.3 | NA | NA |
| 2018 | NUS | 2018_MI_ELA | 26 | KWS149                | 38.3 | NA | NA |
| 2018 | NUS | 2018_MI_ELA | 27 | KWS192                | 40.0 | NA | NA |
| 2018 | NUS | 2018_MI_ELA | 28 | KWS191                | 40.0 | NA | NA |
| 2018 | NUS | 2018_MI_ELA | 29 | KWS193                | 41.7 | NA | NA |
| 2018 | NUS | 2018_MI_ELA | 30 | MI14R0267             | 10.0 | NA | NA |
| 2018 | NUS | 2018_MI_ELA | 31 | MI14W0190             | 18.3 | NA | NA |
| 2018 | NUS | 2018_MI_ELA | 32 | MI14W0906             | 46.7 | NA | NA |
| 2018 | NUS | 2018_MI_ELA | 33 | MI14R1145             | 36.7 | NA | NA |
| 2018 | NUS | 2018_MI_ELA | 34 | MO131753              | 15.0 | NA | NA |
| 2018 | NUS | 2018_MI_ELA | 35 | MO151163              | 15.0 | NA | NA |
| 2018 | NUS | 2018_MI_ELA | 36 | MO151126              | 15.0 | NA | NA |
| 2018 | NUS | 2018_MI_ELA | 37 | MO160132              | 20.0 | NA | NA |
| 2018 | NUS | 2018_MI_ELA | 38 | MO160140              | 33.3 | NA | NA |
| 2018 | NUS | 2018_MI_ELA | 39 | 0566A1-3-1-1-63       | 33.3 | NA | NA |
| 2018 | NUS | 2018_MI_ELA | 40 | 04620A1-1-7-4-10      | 73.3 | NA | NA |
| 2018 | NUS | 2018_MI_ELA | 41 | 0527A1-9-14-4-3-3     | 21.7 | NA | NA |
| 2018 | NUS | 2018_MI_ELA | 42 | 0762A1-2-8            | 25.0 | NA | NA |
| 2018 | NUS | 2018_MI_ELA | 43 | 07419A1-16-1-1-16-1-1 | 18.3 | NA | NA |
| 2018 | NUS | 2018_MI_ELA | 44 | OH12-194-24           | 46.7 | NA | NA |
| 2018 | NUS | 2018_MI_ELA | 45 | OH12-195-22           | 35.0 | NA | NA |
| 2018 | NUS | 2018_MI_ELA | 46 | OH13-314-18           | 71.7 | NA | NA |
| 2018 | NUS | 2018_MI_ELA | 47 | NE13604               | 35.0 | NA | NA |
| 2018 | NUS | 2018_MI_ELA | 48 | NW13493               | 35.0 | NA | NA |
| 2018 | NUS | 2018_MI_ELA | 49 | NE13515               | 40.0 | NA | NA |
| 2018 | NUS | 2018_MI_ELA | 50 | NE14494               | 28.3 | NA | NA |
| 2018 | NUS | 2018_MI_ELA | 51 | NE14696               | 23.3 | NA | NA |
| 2018 | NUS | 2018_MI_ELA | 52 | LES168062             | 31.7 | NA | NA |
| 2018 | NUS | 2018_MI_ELA | 53 | LES167062             | 55.0 | NA | NA |

|      |     |                 |    |                    |      |    |    |
|------|-----|-----------------|----|--------------------|------|----|----|
| 2018 | NUS | 2018_MI_ELA     | 54 | LES167906          | 58.3 | NA | NA |
| 2018 | NUS | 2018_MI_ELA     | 55 | LES167499          | 83.3 | NA | NA |
| 2018 | NUS | 2018_MO_CO<br>L | 1  | TRUMAN             | 7.4  | NA | NA |
| 2018 | NUS | 2018_MO_CO<br>L | 2  | ERNIE              | 25.0 | NA | NA |
| 2018 | NUS | 2018_MO_CO<br>L | 3  | FREEDOM            | 27.1 | NA | NA |
| 2018 | NUS | 2018_MO_CO<br>L | 4  | PIONEER2545        | 35.3 | NA | NA |
| 2018 | NUS | 2018_MO_CO<br>L | 5  | IL13-20616         | 23.8 | NA | NA |
| 2018 | NUS | 2018_MO_CO<br>L | 6  | IL14-11718         | 41.3 | NA | NA |
| 2018 | NUS | 2018_MO_CO<br>L | 7  | IL14-11848         | 11.3 | NA | NA |
| 2018 | NUS | 2018_MO_CO<br>L | 8  | IL14-28462         | 66.8 | NA | NA |
| 2018 | NUS | 2018_MO_CO<br>L | 9  | IL14-DC-64-95-118  | 32.5 | NA | NA |
| 2018 | NUS | 2018_MO_CO<br>L | 10 | VA15W-68           | 25.1 | NA | NA |
| 2018 | NUS | 2018_MO_CO<br>L | 11 | VA16W-29           | 21.7 | NA | NA |
| 2018 | NUS | 2018_MO_CO<br>L | 12 | VA16W-148          | 19.6 | NA | NA |
| 2018 | NUS | 2018_MO_CO<br>L | 13 | VA16W-149          | 20.9 | NA | NA |
| 2018 | NUS | 2018_MO_CO<br>L | 14 | 13VA-FHB-DH252     | 16.2 | NA | NA |
| 2018 | NUS | 2018_MO_CO<br>L | 15 | KY06C-1195-37-2-5  | 33.4 | NA | NA |
| 2018 | NUS | 2018_MO_CO<br>L | 16 | X08C-1181-61-15-5  | 26.5 | NA | NA |
| 2018 | NUS | 2018_MO_CO<br>L | 17 | KY06C-1178-16-10-3 | 16.3 | NA | NA |
| 2018 | NUS | 2018_MO_CO<br>L | 18 | KY07C-1145-94-12-5 | 14.9 | NA | NA |
| 2018 | NUS | 2018_MO_CO<br>L | 19 | X08C-1077-11-18-3  | 44.1 | NA | NA |
| 2018 | NUS | 2018_MO_CO<br>L | 20 | NY11013-10-72-1314 | 31.6 | NA | NA |
| 2018 | NUS | 2018_MO_CO<br>L | 21 | NY11013-10-15-1312 | 39.6 | NA | NA |
| 2018 | NUS | 2018_MO_CO<br>L | 22 | NY02008-807        | 36.6 | NA | NA |
| 2018 | NUS | 2018_MO_CO<br>L | 23 | NY09095-16-928     | 11.6 | NA | NA |
| 2018 | NUS | 2018_MO_CO<br>L | 24 | NY02007-1206       | 27.1 | NA | NA |
| 2018 | NUS | 2018_MO_CO<br>L | 25 | KWS152             | 34.6 | NA | NA |
| 2018 | NUS | 2018_MO_CO<br>L | 26 | KWS149             | 33.3 | NA | NA |
| 2018 | NUS | 2018_MO_CO<br>L | 27 | KWS192             | 22.8 | NA | NA |



|      |     |                 |    |                       |      |    |    |
|------|-----|-----------------|----|-----------------------|------|----|----|
| 2018 | NUS | 2018_MO_CO<br>L | 28 | KWS191                | 34.1 | NA | NA |
| 2018 | NUS | 2018_MO_CO<br>L | 29 | KWS193                | 32.6 | NA | NA |
| 2018 | NUS | 2018_MO_CO<br>L | 30 | MI14R0267             | 15.6 | NA | NA |
| 2018 | NUS | 2018_MO_CO<br>L | 31 | MI14W0190             | 20.7 | NA | NA |
| 2018 | NUS | 2018_MO_CO<br>L | 32 | MI14W0906             | 31.6 | NA | NA |
| 2018 | NUS | 2018_MO_CO<br>L | 33 | MI14R1145             | 13.7 | NA | NA |
| 2018 | NUS | 2018_MO_CO<br>L | 34 | MO131753              | 25.9 | NA | NA |
| 2018 | NUS | 2018_MO_CO<br>L | 35 | MO151163              | 20.6 | NA | NA |
| 2018 | NUS | 2018_MO_CO<br>L | 36 | MO151126              | 22.8 | NA | NA |
| 2018 | NUS | 2018_MO_CO<br>L | 37 | MO160132              | 38.9 | NA | NA |
| 2018 | NUS | 2018_MO_CO<br>L | 38 | MO160140              | 32.3 | NA | NA |
| 2018 | NUS | 2018_MO_CO<br>L | 39 | 0566A1-3-1-1-63       | 22.3 | NA | NA |
| 2018 | NUS | 2018_MO_CO<br>L | 40 | 04620A1-1-7-4-10      | 54.4 | NA | NA |
| 2018 | NUS | 2018_MO_CO<br>L | 41 | 0527A1-9-14-4-3-3     | 33.7 | NA | NA |
| 2018 | NUS | 2018_MO_CO<br>L | 42 | 0762A1-2-8            | 16.3 | NA | NA |
| 2018 | NUS | 2018_MO_CO<br>L | 43 | 07419A1-16-1-1-16-1-1 | 13.6 | NA | NA |
| 2018 | NUS | 2018_MO_CO<br>L | 44 | OH12-194-24           | 17.8 | NA | NA |
| 2018 | NUS | 2018_MO_CO<br>L | 45 | OH12-195-22           | 17.5 | NA | NA |
| 2018 | NUS | 2018_MO_CO<br>L | 46 | OH13-314-18           | 19.8 | NA | NA |
| 2018 | NUS | 2018_MO_CO<br>L | 47 | NE13604               | 33.4 | NA | NA |
| 2018 | NUS | 2018_MO_CO<br>L | 48 | NW13493               | 19.0 | NA | NA |
| 2018 | NUS | 2018_MO_CO<br>L | 49 | NE13515               | 36.3 | NA | NA |
| 2018 | NUS | 2018_MO_CO<br>L | 50 | NE14494               | 34.2 | NA | NA |
| 2018 | NUS | 2018_MO_CO<br>L | 51 | NE14696               | 49.6 | NA | NA |
| 2018 | NUS | 2018_MO_CO<br>L | 52 | LES168062             | 8.4  | NA | NA |
| 2018 | NUS | 2018_MO_CO<br>L | 53 | LES167062             | 18.9 | NA | NA |
| 2018 | NUS | 2018_MO_CO<br>L | 54 | LES167906             | 41.2 | NA | NA |
| 2018 | NUS | 2018_MO_CO<br>L | 55 | LES167499             | 20.8 | NA | NA |

|      |     |             |    |                       |      |      |    |
|------|-----|-------------|----|-----------------------|------|------|----|
| 2018 | NUS | 2018_NY_ITH | 1  | TRUMAN                | 9.5  | 35.0 | NA |
| 2018 | NUS | 2018_NY_ITH | 2  | ERNIE                 | 15.5 | 50.0 | NA |
| 2018 | NUS | 2018_NY_ITH | 3  | FREEDOM               | 19.5 | 70.0 | NA |
| 2018 | NUS | 2018_NY_ITH | 4  | PIONEER2545           | 24.5 | 85.0 | NA |
| 2018 | NUS | 2018_NY_ITH | 5  | IL13-20616            | 10.3 | 40.0 | NA |
| 2018 | NUS | 2018_NY_ITH | 6  | IL14-11718            | 7.5  | 45.0 | NA |
| 2018 | NUS | 2018_NY_ITH | 7  | IL14-11848            | 7.3  | 35.0 | NA |
| 2018 | NUS | 2018_NY_ITH | 8  | IL14-28462            | 9.0  | 60.0 | NA |
| 2018 | NUS | 2018_NY_ITH | 9  | IL14-DC-64-95-118     | 11.0 | 55.0 | NA |
| 2018 | NUS | 2018_NY_ITH | 10 | VA15W-68              | 16.5 | 70.0 | NA |
| 2018 | NUS | 2018_NY_ITH | 11 | VA16W-29              | 24.0 | 80.0 | NA |
| 2018 | NUS | 2018_NY_ITH | 12 | VA16W-148             | 15.8 | 65.0 | NA |
| 2018 | NUS | 2018_NY_ITH | 13 | VA16W-149             | 15.3 | 75.0 | NA |
| 2018 | NUS | 2018_NY_ITH | 14 | 13VA-FHB-DH252        | 17.8 | 35.0 | NA |
| 2018 | NUS | 2018_NY_ITH | 15 | KY06C-1195-37-2-5     | 22.3 | 55.0 | NA |
| 2018 | NUS | 2018_NY_ITH | 16 | X08C-1181-61-15-5     | 24.5 | 75.0 | NA |
| 2018 | NUS | 2018_NY_ITH | 17 | KY06C-1178-16-10-3    | 11.3 | 75.0 | NA |
| 2018 | NUS | 2018_NY_ITH | 18 | KY07C-1145-94-12-5    | 10.0 | 45.0 | NA |
| 2018 | NUS | 2018_NY_ITH | 19 | X08C-1077-11-18-3     | 14.0 | 60.0 | NA |
| 2018 | NUS | 2018_NY_ITH | 20 | NY11013-10-72-1314    | 16.0 | 75.0 | NA |
| 2018 | NUS | 2018_NY_ITH | 21 | NY11013-10-15-1312    | 32.0 | 70.0 | NA |
| 2018 | NUS | 2018_NY_ITH | 22 | NY02008-807           | 22.0 | 45.0 | NA |
| 2018 | NUS | 2018_NY_ITH | 23 | NY09095-16-928        | 9.5  | 45.0 | NA |
| 2018 | NUS | 2018_NY_ITH | 24 | NY02007-1206          | 38.8 | 75.0 | NA |
| 2018 | NUS | 2018_NY_ITH | 25 | KWS152                | 16.5 | 70.0 | NA |
| 2018 | NUS | 2018_NY_ITH | 26 | KWS149                | 13.3 | 55.0 | NA |
| 2018 | NUS | 2018_NY_ITH | 27 | KWS192                | 12.8 | 50.0 | NA |
| 2018 | NUS | 2018_NY_ITH | 28 | KWS191                | 21.5 | 90.0 | NA |
| 2018 | NUS | 2018_NY_ITH | 29 | KWS193                | 17.0 | 75.0 | NA |
| 2018 | NUS | 2018_NY_ITH | 30 | MI14R0267             | 20.8 | 80.0 | NA |
| 2018 | NUS | 2018_NY_ITH | 31 | MI14W0190             | 12.8 | 55.0 | NA |
| 2018 | NUS | 2018_NY_ITH | 32 | MI14W0906             | 26.5 | 90.0 | NA |
| 2018 | NUS | 2018_NY_ITH | 33 | MI14R1145             | 27.0 | 65.0 | NA |
| 2018 | NUS | 2018_NY_ITH | 34 | MO131753              | 7.0  | 55.0 | NA |
| 2018 | NUS | 2018_NY_ITH | 35 | MO151163              | 13.8 | 45.0 | NA |
| 2018 | NUS | 2018_NY_ITH | 36 | MO151126              | 6.0  | 20.0 | NA |
| 2018 | NUS | 2018_NY_ITH | 37 | MO160132              | 12.8 | 55.0 | NA |
| 2018 | NUS | 2018_NY_ITH | 38 | MO160140              | 17.8 | 55.0 | NA |
| 2018 | NUS | 2018_NY_ITH | 39 | 0566A1-3-1-1-63       | 14.0 | 90.0 | NA |
| 2018 | NUS | 2018_NY_ITH | 40 | 04620A1-1-7-4-10      | 15.3 | 85.0 | NA |
| 2018 | NUS | 2018_NY_ITH | 41 | 0527A1-9-14-4-3-3     | 17.5 | 85.0 | NA |
| 2018 | NUS | 2018_NY_ITH | 42 | 0762A1-2-8            | 12.0 | 80.0 | NA |
| 2018 | NUS | 2018_NY_ITH | 43 | 07419A1-16-1-1-16-1-1 | 12.0 | 75.0 | NA |
| 2018 | NUS | 2018_NY_ITH | 44 | OH12-194-24           | 15.3 | 70.0 | NA |
| 2018 | NUS | 2018_NY_ITH | 45 | OH12-195-22           | 11.8 | 70.0 | NA |
| 2018 | NUS | 2018_NY_ITH | 46 | OH13-314-18           | 15.8 | 65.0 | NA |
| 2018 | NUS | 2018_NY_ITH | 47 | NE13604               | 14.3 | 60.0 | NA |
| 2018 | NUS | 2018_NY_ITH | 48 | NW13493               | 13.5 | 35.0 | NA |
| 2018 | NUS | 2018_NY_ITH | 49 | NE13515               | 17.5 | 75.0 | NA |

|      |     |                 |    |                    |      |      |      |
|------|-----|-----------------|----|--------------------|------|------|------|
| 2018 | NUS | 2018_NY_ITH     | 50 | NE14494            | 20.5 | 90.0 | NA   |
| 2018 | NUS | 2018_NY_ITH     | 51 | NE14696            | 8.3  | 75.0 | NA   |
| 2018 | NUS | 2018_NY_ITH     | 52 | LES168062          | 19.0 | 75.0 | NA   |
| 2018 | NUS | 2018_NY_ITH     | 53 | LES167062          | 12.8 | 75.0 | NA   |
| 2018 | NUS | 2018_NY_ITH     | 54 | LES167906          | 23.5 | 75.0 | NA   |
| 2018 | NUS | 2018_NY_ITH     | 55 | LES167499          | 26.5 | 75.0 | NA   |
| 2018 | NUS | 2018_VA_MT<br>H | 1  | TRUMAN             | 31.0 | 20.0 | 13.2 |
| 2018 | NUS | 2018_VA_MT<br>H | 2  | ERNIE              | 39.0 | 22.5 | 12.8 |
| 2018 | NUS | 2018_VA_MT<br>H | 3  | FREEDOM            | 49.3 | 30.0 | 13.7 |
| 2018 | NUS | 2018_VA_MT<br>H | 4  | PIONEER2545        | 75.0 | 47.5 | 26.1 |
| 2018 | NUS | 2018_VA_MT<br>H | 5  | IL13-20616         | 33.5 | 11.5 | 12.9 |
| 2018 | NUS | 2018_VA_MT<br>H | 6  | IL14-11718         | 53.8 | 7.5  | 12.4 |
| 2018 | NUS | 2018_VA_MT<br>H | 7  | IL14-11848         | 26.3 | 7.5  | 4.0  |
| 2018 | NUS | 2018_VA_MT<br>H | 8  | IL14-28462         | 74.8 | 12.5 | 11.0 |
| 2018 | NUS | 2018_VA_MT<br>H | 9  | IL14-DC-64-95-118  | 62.3 | 7.5  | 9.4  |
| 2018 | NUS | 2018_VA_MT<br>H | 10 | VA15W-68           | 52.3 | 25.0 | 25.0 |
| 2018 | NUS | 2018_VA_MT<br>H | 11 | VA16W-29           | 65.8 | 32.5 | 19.7 |
| 2018 | NUS | 2018_VA_MT<br>H | 12 | VA16W-148          | 54.5 | 60.0 | 19.1 |
| 2018 | NUS | 2018_VA_MT<br>H | 13 | VA16W-149          | 65.8 | 32.5 | 11.2 |
| 2018 | NUS | 2018_VA_MT<br>H | 14 | 13VA-FHB-DH252     | 42.3 | 30.0 | 13.2 |
| 2018 | NUS | 2018_VA_MT<br>H | 15 | KY06C-1195-37-2-5  | 39.3 | 42.5 | 13.7 |
| 2018 | NUS | 2018_VA_MT<br>H | 16 | X08C-1181-61-15-5  | 52.8 | 32.5 | 10.3 |
| 2018 | NUS | 2018_VA_MT<br>H | 17 | KY06C-1178-16-10-3 | 28.5 | 37.5 | 13.8 |
| 2018 | NUS | 2018_VA_MT<br>H | 18 | KY07C-1145-94-12-5 | 52.5 | 27.5 | 8.6  |
| 2018 | NUS | 2018_VA_MT<br>H | 19 | X08C-1077-11-18-3  | 31.0 | 35.0 | 10.1 |
| 2018 | NUS | 2018_VA_MT<br>H | 20 | NY11013-10-72-1314 | 57.5 | 50.0 | 17.3 |
| 2018 | NUS | 2018_VA_MT<br>H | 21 | NY11013-10-15-1312 | 46.0 | 60.0 | 14.7 |
| 2018 | NUS | 2018_VA_MT<br>H | 22 | NY02008-807        | 59.0 | 45.0 | 16.9 |
| 2018 | NUS | 2018_VA_MT<br>H | 23 | NY09095-16-928     | 52.5 | 20.0 | 18.9 |
| 2018 | NUS | 2018_VA_MT<br>H | 24 | NY02007-1206       | 74.0 | 52.5 | 23.8 |

|      |     |                 |    |                       |      |      |      |
|------|-----|-----------------|----|-----------------------|------|------|------|
| 2018 | NUS | 2018_VA_MT<br>H | 25 | KWS152                | 46.8 | 37.5 | 12.0 |
| 2018 | NUS | 2018_VA_MT<br>H | 26 | KWS149                | 51.3 | 45.0 | 10.8 |
| 2018 | NUS | 2018_VA_MT<br>H | 27 | KWS192                | 44.0 | 21.5 | 12.1 |
| 2018 | NUS | 2018_VA_MT<br>H | 28 | KWS191                | 51.5 | 35.0 | 20.5 |
| 2018 | NUS | 2018_VA_MT<br>H | 29 | KWS193                | 44.8 | 30.0 | 18.6 |
| 2018 | NUS | 2018_VA_MT<br>H | 30 | MI14R0267             | 38.5 | 11.5 | 15.3 |
| 2018 | NUS | 2018_VA_MT<br>H | 31 | MI14W0190             | 26.3 | 10.0 | 21.1 |
| 2018 | NUS | 2018_VA_MT<br>H | 32 | MI14W0906             | 81.0 | 57.5 | 16.0 |
| 2018 | NUS | 2018_VA_MT<br>H | 33 | MI14R1145             | 57.5 | 27.5 | 11.7 |
| 2018 | NUS | 2018_VA_MT<br>H | 34 | MO131753              | 28.0 | 22.5 | 12.9 |
| 2018 | NUS | 2018_VA_MT<br>H | 35 | MO151163              | 26.5 | 15.0 | 10.1 |
| 2018 | NUS | 2018_VA_MT<br>H | 36 | MO151126              | 28.5 | 11.5 | 9.4  |
| 2018 | NUS | 2018_VA_MT<br>H | 37 | MO160132              | 34.8 | 12.5 | 13.0 |
| 2018 | NUS | 2018_VA_MT<br>H | 38 | MO160140              | 30.3 | 12.5 | 13.3 |
| 2018 | NUS | 2018_VA_MT<br>H | 39 | 0566A1-3-1-1-63       | 59.8 | 40.0 | 16.9 |
| 2018 | NUS | 2018_VA_MT<br>H | 40 | 04620A1-1-7-4-10      | 65.5 | 20.0 | 18.1 |
| 2018 | NUS | 2018_VA_MT<br>H | 41 | 0527A1-9-14-4-3-3     | 26.8 | 14.0 | 7.9  |
| 2018 | NUS | 2018_VA_MT<br>H | 42 | 0762A1-2-8            | 21.3 | 6.5  | 6.6  |
| 2018 | NUS | 2018_VA_MT<br>H | 43 | 07419A1-16-1-1-16-1-1 | 34.8 | 25.0 | 12.1 |
| 2018 | NUS | 2018_VA_MT<br>H | 44 | OH12-194-24           | 62.3 | 40.0 | 21.3 |
| 2018 | NUS | 2018_VA_MT<br>H | 45 | OH12-195-22           | 63.5 | 35.0 | 15.6 |
| 2018 | NUS | 2018_VA_MT<br>H | 46 | OH13-314-18           | 66.8 | 47.5 | 15.4 |
| 2018 | NUS | 2018_VA_MT<br>H | 47 | NE13604               | 51.3 | 62.5 | 21.0 |
| 2018 | NUS | 2018_VA_MT<br>H | 48 | NW13493               | 37.3 | 30.0 | 14.5 |
| 2018 | NUS | 2018_VA_MT<br>H | 49 | NE13515               | 55.8 | 45.0 | 15.0 |
| 2018 | NUS | 2018_VA_MT<br>H | 50 | NE14494               | 59.3 | 50.0 | 15.7 |
| 2018 | NUS | 2018_VA_MT<br>H | 51 | NE14696               | 51.8 | 67.5 | 17.0 |
| 2018 | NUS | 2018_VA_MT<br>H | 52 | LES168062             | 43.8 | 20.0 | 8.4  |

|      |     |                 |    |                            |      |      |      |
|------|-----|-----------------|----|----------------------------|------|------|------|
| 2018 | NUS | 2018_VA_MT<br>H | 53 | LES167062                  | 77.8 | 27.5 | 9.5  |
| 2018 | NUS | 2018_VA_MT<br>H | 54 | LES167906                  | 75.5 | 55.0 | 14.5 |
| 2018 | NUS | 2018_VA_MT<br>H | 55 | LES167499                  | 89.0 | 60.0 | 17.0 |
| 2018 | SUS | NC18            | 1  | ERNIE                      | 40.0 | 25.0 | 7.4  |
| 2018 | SUS | NC18            | 2  | COKER9835                  | 85.0 | 85.0 | 24.3 |
| 2018 | SUS | NC18            | 3  | BESS                       | 25.0 | 25.0 | 8.9  |
| 2018 | SUS | NC18            | 4  | JAMESTOWN                  | 40.0 | 12.5 | 4.5  |
| 2018 | SUS | NC18            | 5  | NC13-21213                 | 65.0 | 32.5 | 8.1  |
| 2018 | SUS | NC18            | 6  | NC14-23372                 | 30.0 | 20.0 | 7.3  |
| 2018 | SUS | NC18            | 7  | NC14-23373                 | 25.0 | 17.5 | 6.7  |
| 2018 | SUS | NC18            | 8  | AR09006-10-2               | 35.0 | 35.0 | 18.8 |
| 2018 | SUS | NC18            | 9  | AR09009-8-3                | 25.0 | 27.5 | 20.2 |
| 2018 | SUS | NC18            | 10 | AR09045-4-2                | 35.0 | 40.0 | 21.4 |
| 2018 | SUS | NC18            | 11 | ARLA09218C-5-2             | 50.0 | 30.0 | 10.9 |
| 2018 | SUS | NC18            | 12 | ARLA09238C-6-3             | 45.0 | 30.0 | 10.7 |
| 2018 | SUS | NC18            | 13 | ARLA09179UC-9-3            | 50.0 | 10.0 | 8.3  |
| 2018 | SUS | NC18            | 14 | ARLA09137UC-17-2           | 50.0 | 30.0 | 8.3  |
| 2018 | SUS | NC18            | 15 | ARLW08160D-20-1            | 50.0 | 12.5 | 6.8  |
| 2018 | SUS | NC18            | 16 | GA13VA-FHB-DH83-<br>17EL53 | 30.0 | 2.5  | 3.4  |
| 2018 | SUS | NC18            | 17 | GA091034-17EL44            | 80.0 | 42.5 | 20.0 |
| 2018 | SUS | NC18            | 18 | GA10654-17LE46             | 45.0 | 25.0 | 3.2  |
| 2018 | SUS | NC18            | 19 | GA10389-17LE56             | 35.0 | 15.0 | 7.5  |
| 2018 | SUS | NC18            | 20 | GA111005-17A3              | 55.0 | 40.0 | 11.2 |
| 2018 | SUS | NC18            | 21 | GA121086-LDH20-<br>17A24   | 35.0 | 10.0 | 4.4  |
| 2018 | SUS | NC18            | 22 | GA091537-17A29             | 25.0 | 25.0 | 5.8  |
| 2018 | SUS | NC18            | 23 | GA1035-DH49-17LE52         | 15.0 | 7.5  | 2.6  |
| 2018 | SUS | NC18            | 24 | KWS154                     | 35.0 | 20.0 | 5.1  |
| 2018 | SUS | NC18            | 25 | KWS192                     | 35.0 | 20.0 | 8.0  |
| 2018 | SUS | NC18            | 26 | KWS193                     | 35.0 | 22.5 | 12.7 |
| 2018 | SUS | NC18            | 27 | L11815                     | 50.0 | 35.0 | 4.6  |
| 2018 | SUS | NC18            | 28 | L11820                     | 50.0 | 25.0 | 3.0  |
| 2018 | SUS | NC18            | 29 | L11811                     | 60.0 | 70.0 | 20.2 |
| 2018 | SUS | NC18            | 30 | LA14066DH-147              | 45.0 | 50.0 | 9.6  |
| 2018 | SUS | NC18            | 31 | LA08277C-P5-3-1            | 35.0 | 17.5 | 8.5  |
| 2018 | SUS | NC18            | 32 | LA11289C-57-4              | 45.0 | 40.0 | 11.9 |
| 2018 | SUS | NC18            | 33 | LA12120SB-56-4             | 35.0 | 27.5 | 7.1  |
| 2018 | SUS | NC18            | 34 | LA14076-LDH6               | 25.0 | 15.0 | 6.1  |
| 2018 | SUS | NC18            | 35 | LA14066DH-172              | 55.0 | 25.0 | 5.9  |
| 2018 | SUS | NC18            | 36 | NC14-20369                 | 45.0 | 35.0 | 11.3 |
| 2018 | SUS | NC18            | 37 | NC14-22588                 | 50.0 | 17.5 | 6.0  |
| 2018 | SUS | NC18            | 38 | NC11546-14                 | 30.0 | 10.0 | 5.2  |
| 2018 | SUS | NC18            | 39 | NC15-23047                 | 45.0 | 27.5 | 8.0  |
| 2018 | SUS | NC18            | 40 | NC15-21787                 | 45.0 | 30.0 | 10.7 |
| 2018 | SUS | NC18            | 41 | NC11331-6                  | 30.0 | 7.5  | 3.9  |
| 2018 | SUS | NC18            | 42 | DH12SRW057-081             | 40.0 | 15.0 | 6.9  |
| 2018 | SUS | NC18            | 43 | 13VA-FHB-DH131             | 45.0 | 22.5 | 11.7 |

|      |     |      |    |                                     |      |      |      |
|------|-----|------|----|-------------------------------------|------|------|------|
| 2018 | SUS | NC18 | 44 | VA15W-70                            | 40.0 | 35.0 | 13.8 |
| 2018 | SUS | NC18 | 45 | VA16W-31                            | 50.0 | 50.0 | 22.4 |
| 2018 | SUS | NC18 | 46 | VA16W-202                           | 50.0 | 27.5 | 6.7  |
| 2018 | SUS | NC18 | 47 | 12VTK10-156                         | 40.0 | 17.5 | 10.6 |
| 2018 | SUS | NC18 | 48 | DH13SRW023-201                      | 45.0 | 27.5 | 10.9 |
| 2018 | SUS | NC18 | 49 | DH13SRW025-14                       | 45.0 | 15.0 | 16.5 |
| 2018 | SUS | LA18 | 1  | ERNIE                               | NA   | 7.5  | 5.5  |
| 2018 | SUS | LA18 | 2  | COKER9835                           | NA   | 60.0 | 16.2 |
| 2018 | SUS | LA18 | 3  | BESS                                | NA   | 5.0  | 3.5  |
| 2018 | SUS | LA18 | 4  | JAMESTOWN                           | NA   | 15.0 | 5.3  |
| 2018 | SUS | LA18 | 5  | NC13-21213                          | NA   | 37.5 | 13.1 |
| 2018 | SUS | LA18 | 6  | NC14-23372                          | NA   | 5.0  | 5.7  |
| 2018 | SUS | LA18 | 7  | NC14-23373                          | NA   | 22.5 | 8.5  |
| 2018 | SUS | LA18 | 8  | AR09006-10-2                        | NA   | 20.0 | 6.6  |
| 2018 | SUS | LA18 | 9  | AR09009-8-3                         | NA   | 17.5 | 7.8  |
| 2018 | SUS | LA18 | 10 | AR09045-4-2                         | NA   | 12.5 | 6.5  |
| 2018 | SUS | LA18 | 11 | ARLA09218C-5-2                      | NA   | 30.0 | 11.4 |
| 2018 | SUS | LA18 | 12 | ARLA09238C-6-3                      | NA   | 12.5 | 6.7  |
| 2018 | SUS | LA18 | 13 | ARLA09179UC-9-3                     | NA   | 25.0 | 12.8 |
| 2018 | SUS | LA18 | 14 | ARLA09137UC-17-2                    | NA   | 32.5 | 13.9 |
| 2018 | SUS | LA18 | 15 | ARLW08160D-20-1<br>GA13VA-FHB-DH83- | NA   | 15.0 | 4.1  |
| 2018 | SUS | LA18 | 16 | 17EL53                              | NA   | 5.0  | 3.1  |
| 2018 | SUS | LA18 | 17 | GA091034-17EL44                     | NA   | 67.5 | 27.9 |
| 2018 | SUS | LA18 | 18 | GA10654-17LE46                      | NA   | 7.5  | 3.6  |
| 2018 | SUS | LA18 | 19 | GA10389-17LE56                      | NA   | 17.5 | 4.3  |
| 2018 | SUS | LA18 | 20 | GA111005-17A3<br>GA121086-LDH20-    | NA   | 35.0 | 16.2 |
| 2018 | SUS | LA18 | 21 | 17A24                               | NA   | 17.5 | 3.7  |
| 2018 | SUS | LA18 | 22 | GA091537-17A29                      | NA   | 10.0 | 3.6  |
| 2018 | SUS | LA18 | 23 | GA1035-DH49-17LE52                  | NA   | 5.0  | 5.4  |
| 2018 | SUS | LA18 | 24 | KWS154                              | NA   | 5.0  | 3.1  |
| 2018 | SUS | LA18 | 25 | KWS192                              | NA   | 20.0 | 3.9  |
| 2018 | SUS | LA18 | 26 | KWS193                              | NA   | NA   | 2.8  |
| 2018 | SUS | LA18 | 27 | L11815                              | NA   | 10.0 | 3.6  |
| 2018 | SUS | LA18 | 28 | L11820                              | NA   | 12.5 | 4.7  |
| 2018 | SUS | LA18 | 29 | L11811                              | NA   | 30.0 | 13.9 |
| 2018 | SUS | LA18 | 30 | LA14066DH-147                       | NA   | 32.5 | 8.5  |
| 2018 | SUS | LA18 | 31 | LA08277C-P5-3-1                     | NA   | 17.5 | 6.5  |
| 2018 | SUS | LA18 | 32 | LA11289C-57-4                       | NA   | 30.0 | 7.8  |
| 2018 | SUS | LA18 | 33 | LA12120SB-56-4                      | NA   | 7.5  | 6.2  |
| 2018 | SUS | LA18 | 34 | LA14076-LDH6                        | NA   | 27.5 | 5.3  |
| 2018 | SUS | LA18 | 35 | LA14066DH-172                       | NA   | 35.0 | 8.6  |
| 2018 | SUS | LA18 | 36 | NC14-20369                          | NA   | 7.5  | 3.1  |
| 2018 | SUS | LA18 | 37 | NC14-22588                          | NA   | 15.0 | 3.8  |
| 2018 | SUS | LA18 | 38 | NC11546-14                          | NA   | 7.5  | 3.2  |
| 2018 | SUS | LA18 | 39 | NC15-23047                          | NA   | 7.5  | 2.1  |
| 2018 | SUS | LA18 | 40 | NC15-21787                          | NA   | 22.5 | 8.1  |
| 2018 | SUS | LA18 | 41 | NC11331-6                           | NA   | 7.5  | 3.2  |
| 2018 | SUS | LA18 | 42 | DH12SRW057-081                      | NA   | 5.0  | 2.4  |

|      |     |      |    |                        |    |      |      |
|------|-----|------|----|------------------------|----|------|------|
| 2018 | SUS | LA18 | 43 | 13VA-FHB-DH131         | NA | 9.0  | 5.1  |
| 2018 | SUS | LA18 | 44 | VA15W-70               | NA | 25.0 | 10.7 |
| 2018 | SUS | LA18 | 45 | VA16W-31               | NA | 15.0 | 10.6 |
| 2018 | SUS | LA18 | 46 | VA16W-202              | NA | 8.5  | 7.0  |
| 2018 | SUS | LA18 | 47 | 12VTK10-156            | NA | 35.0 | 11.3 |
| 2018 | SUS | LA18 | 48 | DH13SRW023-201         | NA | 32.5 | 7.4  |
| 2018 | SUS | LA18 | 49 | DH13SRW025-14          | NA | 10.0 | 3.9  |
| 2018 | SUS | VA18 | 1  | ERNIE                  | NA | 22.0 | 16.8 |
| 2018 | SUS | VA18 | 2  | COKER9835              | NA | 72.5 | 34.8 |
| 2018 | SUS | VA18 | 3  | BESS                   | NA | 22.5 | 16.3 |
| 2018 | SUS | VA18 | 4  | JAMESTOWN              | NA | 41.0 | 13.4 |
| 2018 | SUS | VA18 | 5  | NC13-21213             | NA | 50.0 | 16.0 |
| 2018 | SUS | VA18 | 6  | NC14-23372             | NA | 35.0 | 12.1 |
| 2018 | SUS | VA18 | 7  | NC14-23373             | NA | 20.0 | 22.1 |
| 2018 | SUS | VA18 | 8  | AR09006-10-2           | NA | 39.0 | 21.8 |
| 2018 | SUS | VA18 | 9  | AR09009-8-3            | NA | 46.0 | 21.7 |
| 2018 | SUS | VA18 | 10 | AR09045-4-2            | NA | 54.0 | 33.6 |
| 2018 | SUS | VA18 | 11 | ARLA09218C-5-2         | NA | 35.0 | 20.9 |
| 2018 | SUS | VA18 | 12 | ARLA09238C-6-3         | NA | 41.0 | 12.1 |
| 2018 | SUS | VA18 | 13 | ARLA09179UC-9-3        | NA | 49.0 | 18.2 |
| 2018 | SUS | VA18 | 14 | ARLA09137UC-17-2       | NA | 47.0 | 25.2 |
| 2018 | SUS | VA18 | 15 | ARLW08160D-20-1        | NA | 38.0 | 19.0 |
| 2018 | SUS | VA18 | 16 | GA13VA-FHB-DH83-17EL53 | NA | 29.0 | 8.8  |
| 2018 | SUS | VA18 | 17 | GA091034-17EL44        | NA | 62.0 | 30.5 |
| 2018 | SUS | VA18 | 18 | GA10654-17LE46         | NA | 43.5 | 16.3 |
| 2018 | SUS | VA18 | 19 | GA10389-17LE56         | NA | 35.0 | 16.4 |
| 2018 | SUS | VA18 | 20 | GA111005-17A3          | NA | 57.0 | 23.5 |
| 2018 | SUS | VA18 | 21 | GA121086-LDH20-17A24   | NA | 46.5 | 12.7 |
| 2018 | SUS | VA18 | 22 | GA091537-17A29         | NA | 21.5 | 10.9 |
| 2018 | SUS | VA18 | 23 | GA1035-DH49-17LE52     | NA | 31.5 | 19.9 |
| 2018 | SUS | VA18 | 24 | KWS154                 | NA | 31.5 | 12.3 |
| 2018 | SUS | VA18 | 25 | KWS192                 | NA | 32.0 | 17.5 |
| 2018 | SUS | VA18 | 26 | KWS193                 | NA | 29.5 | 16.7 |
| 2018 | SUS | VA18 | 27 | L11815                 | NA | 37.0 | 14.9 |
| 2018 | SUS | VA18 | 28 | L11820                 | NA | 40.0 | 15.6 |
| 2018 | SUS | VA18 | 29 | L11811                 | NA | 41.5 | 21.3 |
| 2018 | SUS | VA18 | 30 | LA14066DH-147          | NA | 52.5 | 30.9 |
| 2018 | SUS | VA18 | 31 | LA08277C-P5-3-1        | NA | 35.5 | 24.4 |
| 2018 | SUS | VA18 | 32 | LA11289C-57-4          | NA | 73.0 | 17.8 |
| 2018 | SUS | VA18 | 33 | LA12120SB-56-4         | NA | 37.5 | 11.2 |
| 2018 | SUS | VA18 | 34 | LA14076-LDH6           | NA | 52.0 | 17.9 |
| 2018 | SUS | VA18 | 35 | LA14066DH-172          | NA | 56.5 | 22.1 |
| 2018 | SUS | VA18 | 36 | NC14-20369             | NA | 30.5 | 10.7 |
| 2018 | SUS | VA18 | 37 | NC14-22588             | NA | 35.5 | 17.4 |
| 2018 | SUS | VA18 | 38 | NC11546-14             | NA | 25.5 | 15.1 |
| 2018 | SUS | VA18 | 39 | NC15-23047             | NA | 43.0 | 21.3 |
| 2018 | SUS | VA18 | 40 | NC15-21787             | NA | 39.5 | 26.1 |
| 2018 | SUS | VA18 | 41 | NC11331-6              | NA | 26.0 | 11.2 |

|      |     |       |    |                        |    |      |      |
|------|-----|-------|----|------------------------|----|------|------|
| 2018 | SUS | VA18  | 42 | DH12SRW057-081         | NA | 34.5 | 18.0 |
| 2018 | SUS | VA18  | 43 | 13VA-FHB-DH131         | NA | 25.0 | 18.9 |
| 2018 | SUS | VA18  | 44 | VA15W-70               | NA | 44.0 | 21.6 |
| 2018 | SUS | VA18  | 45 | VA16W-31               | NA | 37.5 | 32.8 |
| 2018 | SUS | VA18  | 46 | VA16W-202              | NA | 37.5 | 24.2 |
| 2018 | SUS | VA18  | 47 | 12VTK10-156            | NA | 50.0 | 24.1 |
| 2018 | SUS | VA18  | 48 | DH13SRW023-201         | NA | 34.0 | 20.5 |
| 2018 | SUS | VA18  | 49 | DH13SRW025-14          | NA | 30.0 | 26.0 |
| 2018 | SUS | NAR18 | 1  | ERNIE                  | NA | 4.0  | 6.8  |
| 2018 | SUS | NAR18 | 2  | COKER9835              | NA | 73.3 | 16.0 |
| 2018 | SUS | NAR18 | 3  | BESS                   | NA | 9.3  | 11.1 |
| 2018 | SUS | NAR18 | 4  | JAMESTOWN              | NA | 40.0 | 14.7 |
| 2018 | SUS | NAR18 | 5  | NC13-21213             | NA | 41.7 | 16.9 |
| 2018 | SUS | NAR18 | 6  | NC14-23372             | NA | 33.3 | 19.8 |
| 2018 | SUS | NAR18 | 7  | NC14-23373             | NA | 28.3 | 20.2 |
| 2018 | SUS | NAR18 | 8  | AR09006-10-2           | NA | 43.3 | 28.4 |
| 2018 | SUS | NAR18 | 9  | AR09009-8-3            | NA | 43.3 | 27.1 |
| 2018 | SUS | NAR18 | 10 | AR09045-4-2            | NA | 56.7 | 27.7 |
| 2018 | SUS | NAR18 | 11 | ARLA09218C-5-2         | NA | 33.3 | 16.6 |
| 2018 | SUS | NAR18 | 12 | ARLA09238C-6-3         | NA | 55.0 | 19.5 |
| 2018 | SUS | NAR18 | 13 | ARLA09179UC-9-3        | NA | 36.7 | 19.0 |
| 2018 | SUS | NAR18 | 14 | ARLA09137UC-17-2       | NA | 48.3 | 23.8 |
| 2018 | SUS | NAR18 | 15 | ARLW08160D-20-1        | NA | 25.0 | 9.5  |
| 2018 | SUS | NAR18 | 16 | GA13VA-FHB-DH83-17EL53 | NA | 26.7 | 9.5  |
| 2018 | SUS | NAR18 | 17 | GA091034-17EL44        | NA | 79.3 | 19.9 |
| 2018 | SUS | NAR18 | 18 | GA10654-17LE46         | NA | 38.3 | 12.5 |
| 2018 | SUS | NAR18 | 19 | GA10389-17LE56         | NA | 23.3 | 12.2 |
| 2018 | SUS | NAR18 | 20 | GA111005-17A3          | NA | 61.7 | 22.6 |
| 2018 | SUS | NAR18 | 21 | GA121086-LDH20-17A24   | NA | 33.3 | 8.8  |
| 2018 | SUS | NAR18 | 22 | GA091537-17A29         | NA | 16.0 | 13.6 |
| 2018 | SUS | NAR18 | 23 | GA1035-DH49-17LE52     | NA | 16.7 | 7.5  |
| 2018 | SUS | NAR18 | 24 | KWS154                 | NA | 26.7 | 15.9 |
| 2018 | SUS | NAR18 | 25 | KWS192                 | NA | 28.3 | 14.1 |
| 2018 | SUS | NAR18 | 26 | KWS193                 | NA | 40.0 | 18.1 |
| 2018 | SUS | NAR18 | 27 | L11815                 | NA | 25.0 | 11.9 |
| 2018 | SUS | NAR18 | 28 | L11820                 | NA | 15.0 | 8.4  |
| 2018 | SUS | NAR18 | 29 | L11811                 | NA | 58.3 | 19.2 |
| 2018 | SUS | NAR18 | 30 | LA14066DH-147          | NA | 81.7 | 20.7 |
| 2018 | SUS | NAR18 | 31 | LA08277C-P5-3-1        | NA | 40.0 | 14.2 |
| 2018 | SUS | NAR18 | 32 | LA11289C-57-4          | NA | 65.0 | 21.2 |
| 2018 | SUS | NAR18 | 33 | LA12120SB-56-4         | NA | 31.7 | 12.7 |
| 2018 | SUS | NAR18 | 34 | LA14076-LDH6           | NA | 18.3 | 6.8  |
| 2018 | SUS | NAR18 | 35 | LA14066DH-172          | NA | 35.0 | 9.5  |
| 2018 | SUS | NAR18 | 36 | NC14-20369             | NA | 20.0 | 5.3  |
| 2018 | SUS | NAR18 | 37 | NC14-22588             | NA | 25.0 | 8.2  |
| 2018 | SUS | NAR18 | 38 | NC11546-14             | NA | 26.7 | 8.3  |
| 2018 | SUS | NAR18 | 39 | NC15-23047             | NA | 13.7 | 10.2 |
| 2018 | SUS | NAR18 | 40 | NC15-21787             | NA | 36.0 | 14.2 |



|      |     |       |    |                        |    |      |      |
|------|-----|-------|----|------------------------|----|------|------|
| 2018 | SUS | NAR18 | 41 | NC11331-6              | NA | 30.0 | 10.7 |
| 2018 | SUS | NAR18 | 42 | DH12SRW057-081         | NA | 22.7 | 6.9  |
| 2018 | SUS | NAR18 | 43 | 13VA-FHB-DH131         | NA | 33.3 | 21.6 |
| 2018 | SUS | NAR18 | 44 | VA15W-70               | NA | 45.0 | 23.4 |
| 2018 | SUS | NAR18 | 45 | VA16W-31               | NA | 78.3 | 28.4 |
| 2018 | SUS | NAR18 | 46 | VA16W-202              | NA | 35.0 | 9.1  |
| 2018 | SUS | NAR18 | 47 | 12VTK10-156            | NA | 53.3 | 20.4 |
| 2018 | SUS | NAR18 | 48 | DH13SRW023-201         | NA | 38.3 | 21.3 |
| 2018 | SUS | NAR18 | 49 | DH13SRW025-14          | NA | 41.7 | 18.0 |
| 2018 | SUS | FAR18 | 1  | ERNIE                  | NA | 7.7  | 2.7  |
| 2018 | SUS | FAR18 | 2  | COKER9835              | NA | 42.7 | 9.0  |
| 2018 | SUS | FAR18 | 3  | BESS                   | NA | 2.7  | 4.2  |
| 2018 | SUS | FAR18 | 4  | JAMESTOWN              | NA | 5.0  | 3.3  |
| 2018 | SUS | FAR18 | 5  | NC13-21213             | NA | 14.0 | 3.5  |
| 2018 | SUS | FAR18 | 6  | NC14-23372             | NA | 14.0 | 8.1  |
| 2018 | SUS | FAR18 | 7  | NC14-23373             | NA | 12.3 | 3.8  |
| 2018 | SUS | FAR18 | 8  | AR09006-10-2           | NA | 13.0 | 8.9  |
| 2018 | SUS | FAR18 | 9  | AR09009-8-3            | NA | 7.7  | 5.8  |
| 2018 | SUS | FAR18 | 10 | AR09045-4-2            | NA | 20.7 | 10.0 |
| 2018 | SUS | FAR18 | 11 | ARLA09218C-5-2         | NA | 7.3  | 3.9  |
| 2018 | SUS | FAR18 | 12 | ARLA09238C-6-3         | NA | 3.7  | 3.7  |
| 2018 | SUS | FAR18 | 13 | ARLA09179UC-9-3        | NA | 11.7 | 5.7  |
| 2018 | SUS | FAR18 | 14 | ARLA09137UC-17-2       | NA | 6.0  | 4.1  |
| 2018 | SUS | FAR18 | 15 | ARLW08160D-20-1        | NA | 7.7  | 5.6  |
| 2018 | SUS | FAR18 | 16 | GA13VA-FHB-DH83-17EL53 | NA | 6.0  | 2.7  |
| 2018 | SUS | FAR18 | 17 | GA091034-17EL44        | NA | 14.3 | 3.5  |
| 2018 | SUS | FAR18 | 18 | GA10654-17LE46         | NA | 5.0  | 3.2  |
| 2018 | SUS | FAR18 | 19 | GA10389-17LE56         | NA | 4.3  | 2.1  |
| 2018 | SUS | FAR18 | 20 | GA111005-17A3          | NA | 26.7 | 5.4  |
| 2018 | SUS | FAR18 | 21 | GA121086-LDH20-17A24   | NA | 10.7 | 2.4  |
| 2018 | SUS | FAR18 | 22 | GA091537-17A29         | NA | 9.7  | 2.6  |
| 2018 | SUS | FAR18 | 23 | GA1035-DH49-17LE52     | NA | 6.0  | 2.7  |
| 2018 | SUS | FAR18 | 24 | KWS154                 | NA | 5.0  | 3.9  |
| 2018 | SUS | FAR18 | 25 | KWS192                 | NA | 9.3  | 3.5  |
| 2018 | SUS | FAR18 | 26 | KWS193                 | NA | 8.0  | 6.1  |
| 2018 | SUS | FAR18 | 27 | L11815                 | NA | 6.0  | 2.2  |
| 2018 | SUS | FAR18 | 28 | L11820                 | NA | 2.7  | 3.7  |
| 2018 | SUS | FAR18 | 29 | L11811                 | NA | 24.3 | 7.3  |
| 2018 | SUS | FAR18 | 30 | LA14066DH-147          | NA | 46.7 | 7.8  |
| 2018 | SUS | FAR18 | 31 | LA08277C-P5-3-1        | NA | 6.3  | 2.6  |
| 2018 | SUS | FAR18 | 32 | LA11289C-57-4          | NA | 17.7 | 5.2  |
| 2018 | SUS | FAR18 | 33 | LA12120SB-56-4         | NA | 17.3 | 2.9  |
| 2018 | SUS | FAR18 | 34 | LA14076-LDH6           | NA | 4.7  | 2.5  |
| 2018 | SUS | FAR18 | 35 | LA14066DH-172          | NA | 7.3  | 4.2  |
| 2018 | SUS | FAR18 | 36 | NC14-20369             | NA | 4.3  | 2.5  |
| 2018 | SUS | FAR18 | 37 | NC14-22588             | NA | 7.0  | 2.8  |
| 2018 | SUS | FAR18 | 38 | NC11546-14             | NA | 4.3  | 2.1  |
| 2018 | SUS | FAR18 | 39 | NC15-23047             | NA | 3.7  | 2.7  |

|      |     |       |    |                  |      |      |     |
|------|-----|-------|----|------------------|------|------|-----|
| 2018 | SUS | FAR18 | 40 | NC15-21787       | NA   | 45.0 | 7.4 |
| 2018 | SUS | FAR18 | 41 | NC11331-6        | NA   | 11.7 | 2.4 |
| 2018 | SUS | FAR18 | 42 | DH12SRW057-081   | NA   | 3.7  | 3.2 |
| 2018 | SUS | FAR18 | 43 | 13VA-FHB-DH131   | NA   | 9.3  | 7.9 |
| 2018 | SUS | FAR18 | 44 | VA15W-70         | NA   | 16.7 | 9.7 |
| 2018 | SUS | FAR18 | 45 | VA16W-31         | NA   | 21.7 | 9.2 |
| 2018 | SUS | FAR18 | 46 | VA16W-202        | NA   | 6.7  | 3.8 |
| 2018 | SUS | FAR18 | 47 | 12VTK10-156      | NA   | 8.7  | 4.9 |
| 2018 | SUS | FAR18 | 48 | DH13SRW023-201   | NA   | 4.3  | 4.6 |
| 2018 | SUS | FAR18 | 49 | DH13SRW025-14    | NA   | 8.7  | 6.8 |
| 2017 | SUS | NC17  | 1  | ERNIE            | 14.5 | NA   | 0.2 |
| 2017 | SUS | NC17  | 2  | COKER9835        | 35.0 | NA   | 1.8 |
| 2017 | SUS | NC17  | 3  | BESS             | 18.5 | NA   | 0.4 |
| 2017 | SUS | NC17  | 4  | JAMESTOWN        | 49.0 | NA   | NA  |
| 2017 | SUS | NC17  | 5  | NC13-20076       | 10.5 | NA   | 0.2 |
| 2017 | SUS | NC17  | 6  | VA13W-38         | 13.5 | NA   | 0.3 |
| 2017 | SUS | NC17  | 7  | ARLA07133C-19-4  | 31.0 | NA   | 0.9 |
| 2017 | SUS | NC17  | 8  | ARLA07133C-3-4   | 17.5 | NA   | 0.4 |
| 2017 | SUS | NC17  | 9  | ARLA06146E-1-4   | 12.5 | NA   | 0.7 |
| 2017 | SUS | NC17  | 10 | AR08109-17-2     | 18.5 | NA   | 0.7 |
| 2017 | SUS | NC17  | 11 | AR08015-17-4     | 10.0 | NA   | 2.0 |
| 2017 | SUS | NC17  | 12 | AR08057-5-1      | 30.0 | NA   | 1.1 |
| 2017 | SUS | NC17  | 13 | LES15-5369       | 20.0 | NA   | 0.5 |
| 2017 | SUS | NC17  | 14 | LES15-5499       | 23.5 | NA   | 1.6 |
| 2017 | SUS | NC17  | 15 | LES15-5605       | 37.8 | NA   | 0.4 |
| 2017 | SUS | NC17  | 16 | GA09343-16ES3    | 12.0 | NA   | 1.6 |
| 2017 | SUS | NC17  | 17 | GA09410-16ES22   | 30.8 | NA   | NA  |
| 2017 | SUS | NC17  | 18 | GA09129-16EL56   | 13.5 | NA   | 1.1 |
| 2017 | SUS | NC17  | 19 | GA121176-16JS49  | 40.0 | NA   | NA  |
| 2017 | SUS | NC17  | 20 | GA09163-16ES19   | 11.0 | NA   | 1.1 |
| 2017 | SUS | NC17  | 21 | GA09144-16ES23   | 13.0 | NA   | 0.2 |
| 2017 | SUS | NC17  | 22 | GA05450-16ES8    | 32.5 | NA   | 1.6 |
| 2017 | SUS | NC17  | 23 | GA09054-16ES25   | 12.5 | NA   | 0.4 |
| 2017 | SUS | NC17  | 24 | KWS095           | 17.5 | NA   | 1.2 |
| 2017 | SUS | NC17  | 25 | KWS103           | 21.0 | NA   | 0.9 |
| 2017 | SUS | NC17  | 26 | KWS114           | 13.5 | NA   | 2.3 |
| 2017 | SUS | NC17  | 27 | KWS122           | 37.8 | NA   | 0.1 |
| 2017 | SUS | NC17  | 28 | KWS133           | 27.5 | NA   | 1.8 |
| 2017 | SUS | NC17  | 29 | KWS141           | 20.0 | NA   | 1.7 |
| 2017 | SUS | NC17  | 30 | LA08265C-50      | 17.5 | NA   | 0.3 |
| 2017 | SUS | NC17  | 31 | LA09101UB-48-3-5 | 15.0 | NA   | 0.2 |
| 2017 | SUS | NC17  | 32 | LW08049C-74-2-5  | 31.5 | NA   | 0.4 |
| 2017 | SUS | NC17  | 33 | LA10081C-18      | 22.5 | NA   | 0.6 |
| 2017 | SUS | NC17  | 34 | LA11309GS-16     | 17.0 | NA   | NA  |
| 2017 | SUS | NC17  | 35 | NC13-23443       | 15.0 | NA   | 0.3 |
| 2017 | SUS | NC17  | 36 | NC13-21213       | 7.8  | NA   | 1.0 |
| 2017 | SUS | NC17  | 37 | NC13-20332       | 22.5 | NA   | 1.8 |
| 2017 | SUS | NC17  | 38 | NC14-23372       | 22.5 | NA   | 0.4 |
| 2017 | SUS | NC17  | 39 | NC14-23373       | 21.5 | NA   | 0.3 |

|      |     |       |    |                    |       |      |     |
|------|-----|-------|----|--------------------|-------|------|-----|
| 2017 | SUS | NC17  | 40 | VA13W-174          | 11.0  | NA   | 0.4 |
| 2017 | SUS | NC17  | 41 | VA09MAS2-131-6-2   | 20.0  | NA   | 0.7 |
| 2017 | SUS | NC17  | 42 | VA14W-32           | 12.8  | NA   | NA  |
|      |     |       |    | VA07MAS1-7047-1-1- |       |      |     |
| 2017 | SUS | NC17  | 43 | 4-2                | 17.5  | NA   | 0.3 |
| 2017 | SUS | NC17  | 44 | DH12SRW056-058     | 10.0  | NA   | 0.7 |
| 2017 | SUS | NC17  | 45 | DH11SRW061-16      | 27.8  | NA   | 2.3 |
| 2017 | SUS | NC17  | 46 | VA09MAS2-131-6-2-4 | 7.5   | NA   | 0.9 |
| 2017 | SUS | NAR17 | 1  | ERNIE              | 42.0  | 11.0 | 1.7 |
| 2017 | SUS | NAR17 | 2  | COKER9835          | 100.0 | 97.0 | 5.7 |
| 2017 | SUS | NAR17 | 3  | BESS               | 7.0   | 7.0  | 2.2 |
| 2017 | SUS | NAR17 | 4  | JAMESTOWN          | 5.0   | 6.0  | 0.9 |
| 2017 | SUS | NAR17 | 5  | NC13-20076         | 3.0   | 4.0  | 0.7 |
| 2017 | SUS | NAR17 | 6  | VA13W-38           | 12.0  | 58.0 | 1.8 |
| 2017 | SUS | NAR17 | 7  | ARLA07133C-19-4    | 5.0   | 13.0 | 1.7 |
| 2017 | SUS | NAR17 | 8  | ARLA07133C-3-4     | 15.0  | 8.0  | 1.6 |
| 2017 | SUS | NAR17 | 9  | ARLA06146E-1-4     | 7.0   | 24.0 | 1.9 |
| 2017 | SUS | NAR17 | 10 | AR08109-17-2       | 13.0  | 7.0  | 2.1 |
| 2017 | SUS | NAR17 | 11 | AR08015-17-4       | 18.0  | 35.0 | 4.8 |
| 2017 | SUS | NAR17 | 12 | AR08057-5-1        | 20.0  | 65.0 | 5.0 |
| 2017 | SUS | NAR17 | 13 | LES15-5369         | 15.0  | 30.0 | 2.1 |
| 2017 | SUS | NAR17 | 14 | LES15-5499         | 15.0  | 28.0 | 2.9 |
| 2017 | SUS | NAR17 | 15 | LES15-5605         | 18.0  | 40.0 | 3.5 |
| 2017 | SUS | NAR17 | 16 | GA09343-16ES3      | 22.0  | 60.0 | 3.9 |
| 2017 | SUS | NAR17 | 17 | GA09410-16ES22     | 37.0  | 33.0 | 2.3 |
| 2017 | SUS | NAR17 | 18 | GA09129-16EL56     | 10.0  | 17.0 | 1.1 |
| 2017 | SUS | NAR17 | 19 | GA121176-16JS49    | 12.0  | 22.0 | 1.0 |
| 2017 | SUS | NAR17 | 20 | GA09163-16ES19     | 5.0   | 15.0 | 2.6 |
| 2017 | SUS | NAR17 | 21 | GA09144-16ES23     | 10.0  | 23.0 | 1.1 |
| 2017 | SUS | NAR17 | 22 | GA05450-16ES8      | 25.0  | 57.0 | 3.8 |
| 2017 | SUS | NAR17 | 23 | GA09054-16ES25     | 13.0  | 15.0 | 1.1 |
| 2017 | SUS | NAR17 | 24 | KWS095             | 8.0   | 47.0 | 4.0 |
| 2017 | SUS | NAR17 | 25 | KWS103             | 7.0   | 12.0 | 2.2 |
| 2017 | SUS | NAR17 | 26 | KWS114             | 7.0   | 37.0 | 5.0 |
| 2017 | SUS | NAR17 | 27 | KWS122             | 7.0   | 5.0  | 1.1 |
| 2017 | SUS | NAR17 | 28 | KWS133             | 12.0  | 47.0 | 4.9 |
| 2017 | SUS | NAR17 | 29 | KWS141             | 7.0   | 22.0 | 2.9 |
| 2017 | SUS | NAR17 | 30 | LA08265C-50        | 12.0  | 10.0 | 1.5 |
| 2017 | SUS | NAR17 | 31 | LA09101UB-48-3-5   | 8.0   | 22.0 | 1.4 |
| 2017 | SUS | NAR17 | 32 | LW08049C-74-2-5    | 7.0   | 5.0  | 0.6 |
| 2017 | SUS | NAR17 | 33 | LA10081C-18        | 3.0   | 7.0  | 1.5 |
| 2017 | SUS | NAR17 | 34 | LA11309GS-16       | 18.0  | 13.0 | 0.6 |
| 2017 | SUS | NAR17 | 35 | NC13-23443         | 80.0  | 47.0 | 2.5 |
| 2017 | SUS | NAR17 | 36 | NC13-21213         | 17.0  | 37.0 | 2.3 |
| 2017 | SUS | NAR17 | 37 | NC13-20332         | 18.0  | 35.0 | 2.9 |
| 2017 | SUS | NAR17 | 38 | NC14-23372         | 12.0  | 17.0 | 3.1 |
| 2017 | SUS | NAR17 | 39 | NC14-23373         | 5.0   | 8.0  | 1.5 |
| 2017 | SUS | NAR17 | 40 | VA13W-174          | 17.0  | 62.0 | 1.2 |
| 2017 | SUS | NAR17 | 41 | VA09MAS2-131-6-2   | 20.0  | 35.0 | 3.0 |
| 2017 | SUS | NAR17 | 42 | VA14W-32           | 20.0  | 12.0 | 2.3 |

|      |     |       |    |                    |      |      |      |
|------|-----|-------|----|--------------------|------|------|------|
|      |     |       |    | VA07MAS1-7047-1-1- |      |      |      |
| 2017 | SUS | NAR17 | 43 | 4-2                | 15.0 | 58.0 | 1.4  |
| 2017 | SUS | NAR17 | 44 | DH12SRW056-058     | 8.0  | 8.0  | 2.2  |
| 2017 | SUS | NAR17 | 45 | DH11SRW061-16      | 17.0 | 8.0  | 1.4  |
| 2017 | SUS | NAR17 | 46 | VA09MAS2-131-6-2-4 | 20.0 | 48.0 | 4.4  |
| 2017 | SUS | KY17  | 1  | ERNIE              | 23.0 | 30.0 | 17.1 |
| 2017 | SUS | KY17  | 2  | COKER9835          | 41.0 | 63.0 | 23.8 |
| 2017 | SUS | KY17  | 3  | BESS               | 48.0 | 18.0 | 17.5 |
| 2017 | SUS | KY17  | 4  | JAMESTOWN          | 31.0 | 30.0 | 14.9 |
| 2017 | SUS | KY17  | 5  | NC13-20076         | 54.0 | 25.0 | 13.7 |
| 2017 | SUS | KY17  | 6  | VA13W-38           | 48.0 | 25.0 | 14.8 |
| 2017 | SUS | KY17  | 7  | ARLA07133C-19-4    | 40.0 | 35.0 | 22.7 |
| 2017 | SUS | KY17  | 8  | ARLA07133C-3-4     | 27.0 | 45.0 | 18.8 |
| 2017 | SUS | KY17  | 9  | ARLA06146E-1-4     | 44.0 | 28.0 | 19.2 |
| 2017 | SUS | KY17  | 10 | AR08109-17-2       | 58.0 | 38.0 | 18.0 |
| 2017 | SUS | KY17  | 11 | AR08015-17-4       | 29.0 | 50.0 | 20.4 |
| 2017 | SUS | KY17  | 12 | AR08057-5-1        | 34.0 | 45.0 | 18.2 |
| 2017 | SUS | KY17  | 13 | LES15-5369         | 47.0 | 43.0 | 16.4 |
| 2017 | SUS | KY17  | 14 | LES15-5499         | 45.0 | 38.0 | 13.5 |
| 2017 | SUS | KY17  | 15 | LES15-5605         | 26.0 | 40.0 | 22.1 |
| 2017 | SUS | KY17  | 16 | GA09343-16ES3      | 43.0 | 70.0 | 29.1 |
| 2017 | SUS | KY17  | 17 | GA09410-16ES22     | 39.0 | 53.0 | 26.8 |
| 2017 | SUS | KY17  | 18 | GA09129-16EL56     | 42.0 | 33.0 | 21.0 |
| 2017 | SUS | KY17  | 19 | GA121176-16JS49    | 39.0 | 30.0 | 21.3 |
| 2017 | SUS | KY17  | 20 | GA09163-16ES19     | 48.0 | 35.0 | 32.1 |
| 2017 | SUS | KY17  | 21 | GA09144-16ES23     | 49.0 | 35.0 | 17.5 |
| 2017 | SUS | KY17  | 22 | GA05450-16ES8      | 31.0 | 68.0 | 33.0 |
| 2017 | SUS | KY17  | 23 | GA09054-16ES25     | 47.0 | 55.0 | 24.0 |
| 2017 | SUS | KY17  | 24 | KWS095             | 33.0 | 38.0 | 16.3 |
| 2017 | SUS | KY17  | 25 | KWS103             | 37.0 | 45.0 | 14.0 |
| 2017 | SUS | KY17  | 26 | KWS114             | 61.0 | 45.0 | 16.5 |
| 2017 | SUS | KY17  | 27 | KWS122             | 51.0 | 28.0 | 8.9  |
| 2017 | SUS | KY17  | 28 | KWS133             | 35.0 | 40.0 | 19.3 |
| 2017 | SUS | KY17  | 29 | KWS141             | 57.0 | 28.0 | 14.5 |
| 2017 | SUS | KY17  | 30 | LA08265C-50        | 57.0 | 30.0 | 14.6 |
| 2017 | SUS | KY17  | 31 | LA09101UB-48-3-5   | 29.0 | 25.0 | 17.7 |
| 2017 | SUS | KY17  | 32 | LW08049C-74-2-5    | 61.0 | 35.0 | 18.4 |
| 2017 | SUS | KY17  | 33 | LA10081C-18        | 43.0 | 58.0 | 29.3 |
| 2017 | SUS | KY17  | 34 | LA11309GS-16       | 42.0 | 28.0 | 12.9 |
| 2017 | SUS | KY17  | 35 | NC13-23443         | 52.0 | 20.0 | 14.7 |
| 2017 | SUS | KY17  | 36 | NC13-21213         | 35.0 | 50.0 | 14.6 |
| 2017 | SUS | KY17  | 37 | NC13-20332         | 42.0 | 63.0 | 32.2 |
| 2017 | SUS | KY17  | 38 | NC14-23372         | 52.0 | 38.0 | 16.2 |
| 2017 | SUS | KY17  | 39 | NC14-23373         | 34.0 | 28.0 | 22.9 |
| 2017 | SUS | KY17  | 40 | VA13W-174          | 32.0 | 25.0 | 16.1 |
| 2017 | SUS | KY17  | 41 | VA09MAS2-131-6-2   | 30.0 | 25.0 | 24.9 |
| 2017 | SUS | KY17  | 42 | VA14W-32           | 56.0 | 55.0 | 27.3 |
|      |     |       |    | VA07MAS1-7047-1-1- |      |      |      |
| 2017 | SUS | KY17  | 43 | 4-2                | 40.0 | 23.0 | 24.6 |
| 2017 | SUS | KY17  | 44 | DH12SRW056-058     | 44.0 | 35.0 | 21.5 |

|      |     |      |    |                       |      |      |      |
|------|-----|------|----|-----------------------|------|------|------|
| 2017 | SUS | KY17 | 45 | DH11SRW061-16         | 62.0 | 20.0 | 14.4 |
| 2017 | SUS | KY17 | 46 | VA09MAS2-131-6-2-4    | 30.0 | 43.0 | 25.9 |
| 2017 | SUS | LA17 | 1  | ERNIE                 | 10.0 | 10.0 | 11.0 |
| 2017 | SUS | LA17 | 2  | COKER9835             | 50.0 | 85.0 | 13.0 |
| 2017 | SUS | LA17 | 3  | BESS                  | 28.0 | 10.0 | 6.0  |
| 2017 | SUS | LA17 | 4  | JAMESTOWN             | 15.0 | 15.0 | 6.0  |
| 2017 | SUS | LA17 | 5  | NC13-20076            | 18.0 | 35.0 | 8.0  |
| 2017 | SUS | LA17 | 6  | VA13W-38              | 20.0 | 25.0 | 14.0 |
| 2017 | SUS | LA17 | 7  | ARLA07133C-19-4       | 5.0  | 35.0 | 16.0 |
| 2017 | SUS | LA17 | 8  | ARLA07133C-3-4        | 23.0 | 35.0 | 13.0 |
| 2017 | SUS | LA17 | 9  | ARLA06146E-1-4        | 15.0 | 25.0 | 8.0  |
| 2017 | SUS | LA17 | 10 | AR08109-17-2          | 18.0 | 30.0 | 16.0 |
| 2017 | SUS | LA17 | 11 | AR08015-17-4          | 18.0 | 40.0 | 25.0 |
| 2017 | SUS | LA17 | 12 | AR08057-5-1           | 28.0 | 35.0 | 11.0 |
| 2017 | SUS | LA17 | 13 | LES15-5369            | 5.0  | 35.0 | 5.0  |
| 2017 | SUS | LA17 | 14 | LES15-5499            | NA   | 35.0 | 16.0 |
| 2017 | SUS | LA17 | 15 | LES15-5605            | 20.0 | 30.0 | 21.0 |
| 2017 | SUS | LA17 | 16 | GA09343-16ES3         | 23.0 | 65.0 | 23.0 |
| 2017 | SUS | LA17 | 17 | GA09410-16ES22        | 18.0 | 35.0 | 26.0 |
| 2017 | SUS | LA17 | 18 | GA09129-16EL56        | 15.0 | 30.0 | 13.0 |
| 2017 | SUS | LA17 | 19 | GA121176-16JS49       | 33.0 | 75.0 | 15.0 |
| 2017 | SUS | LA17 | 20 | GA09163-16ES19        | 25.0 | 45.0 | 26.0 |
| 2017 | SUS | LA17 | 21 | GA09144-16ES23        | 18.0 | 30.0 | 27.0 |
| 2017 | SUS | LA17 | 22 | GA05450-16ES8         | 23.0 | 40.0 | 23.0 |
| 2017 | SUS | LA17 | 23 | GA09054-16ES25        | 28.0 | 35.0 | 17.0 |
| 2017 | SUS | LA17 | 24 | KWS095                | 15.0 | 35.0 | 8.0  |
| 2017 | SUS | LA17 | 25 | KWS103                | 10.0 | 20.0 | 9.0  |
| 2017 | SUS | LA17 | 26 | KWS114                | 60.0 | 30.0 | 25.0 |
| 2017 | SUS | LA17 | 27 | KWS122                | 18.0 | 30.0 | 17.0 |
| 2017 | SUS | LA17 | 28 | KWS133                | 15.0 | 40.0 | 22.0 |
| 2017 | SUS | LA17 | 29 | KWS141                | 33.0 | 30.0 | 19.0 |
| 2017 | SUS | LA17 | 30 | LA08265C-50           | 23.0 | 40.0 | 13.0 |
| 2017 | SUS | LA17 | 31 | LA09101UB-48-3-5      | 13.0 | 25.0 | 5.0  |
| 2017 | SUS | LA17 | 32 | LW08049C-74-2-5       | 15.0 | 25.0 | 12.0 |
| 2017 | SUS | LA17 | 33 | LA10081C-18           | 20.0 | 40.0 | 20.0 |
| 2017 | SUS | LA17 | 34 | LA11309GS-16          | 18.0 | 40.0 | 9.0  |
| 2017 | SUS | LA17 | 35 | NC13-23443            | 18.0 | 25.0 | 7.0  |
| 2017 | SUS | LA17 | 36 | NC13-21213            | 23.0 | 30.0 | 12.0 |
| 2017 | SUS | LA17 | 37 | NC13-20332            | 23.0 | 20.0 | 8.0  |
| 2017 | SUS | LA17 | 38 | NC14-23372            | 18.0 | 40.0 | 17.0 |
| 2017 | SUS | LA17 | 39 | NC14-23373            | 15.0 | 35.0 | 27.0 |
| 2017 | SUS | LA17 | 40 | VA13W-174             | 18.0 | 20.0 | 16.0 |
| 2017 | SUS | LA17 | 41 | VA09MAS2-131-6-2      | 35.0 | 40.0 | 18.0 |
| 2017 | SUS | LA17 | 42 | VA14W-32              | 50.0 | 70.0 | 36.0 |
| 2017 | SUS | LA17 | 43 | VA07MAS1-7047-1-1-4-2 | 15.0 | 40.0 | 28.0 |
| 2017 | SUS | LA17 | 44 | DH12SRW056-058        | 20.0 | 30.0 | 25.0 |
| 2017 | SUS | LA17 | 45 | DH11SRW061-16         | 40.0 | 40.0 | 21.0 |
| 2017 | SUS | LA17 | 46 | VA09MAS2-131-6-2-4    | 18.0 | 45.0 | 41.0 |
| 2017 | SUS | MO17 | 1  | ERNIE                 | 13.0 | 8.0  | NA   |

|      |     |      |    |                       |      |      |     |
|------|-----|------|----|-----------------------|------|------|-----|
| 2017 | SUS | MO17 | 2  | COKER9835             | 22.0 | 30.0 | NA  |
| 2017 | SUS | MO17 | 3  | BESS                  | 9.0  | 10.0 | NA  |
| 2017 | SUS | MO17 | 4  | JAMESTOWN             | 9.0  | 8.0  | NA  |
| 2017 | SUS | MO17 | 5  | NC13-20076            | 14.0 | 8.0  | NA  |
| 2017 | SUS | MO17 | 6  | VA13W-38              | 10.0 | 8.0  | NA  |
| 2017 | SUS | MO17 | 7  | ARLA07133C-19-4       | 8.0  | 8.0  | NA  |
| 2017 | SUS | MO17 | 8  | ARLA07133C-3-4        | 17.0 | 10.0 | NA  |
| 2017 | SUS | MO17 | 9  | ARLA06146E-1-4        | 15.0 | 18.0 | NA  |
| 2017 | SUS | MO17 | 10 | AR08109-17-2          | 13.0 | 10.0 | NA  |
| 2017 | SUS | MO17 | 11 | AR08015-17-4          | 15.0 | 10.0 | NA  |
| 2017 | SUS | MO17 | 12 | AR08057-5-1           | 10.0 | 5.0  | NA  |
| 2017 | SUS | MO17 | 13 | LES15-5369            | 10.0 | 13.0 | NA  |
| 2017 | SUS | MO17 | 14 | LES15-5499            | 11.0 | 10.0 | NA  |
| 2017 | SUS | MO17 | 15 | LES15-5605            | 14.0 | 5.0  | NA  |
| 2017 | SUS | MO17 | 16 | GA09343-16ES3         | 13.0 | 15.0 | NA  |
| 2017 | SUS | MO17 | 17 | GA09410-16ES22        | 11.0 | 25.0 | NA  |
| 2017 | SUS | MO17 | 18 | GA09129-16EL56        | 10.0 | 10.0 | NA  |
| 2017 | SUS | MO17 | 19 | GA121176-16JS49       | 8.0  | 20.0 | NA  |
| 2017 | SUS | MO17 | 20 | GA09163-16ES19        | 8.0  | 8.0  | NA  |
| 2017 | SUS | MO17 | 21 | GA09144-16ES23        | 18.0 | 13.0 | NA  |
| 2017 | SUS | MO17 | 22 | GA05450-16ES8         | 12.0 | 10.0 | NA  |
| 2017 | SUS | MO17 | 23 | GA09054-16ES25        | 13.0 | 25.0 | NA  |
| 2017 | SUS | MO17 | 24 | KWS095                | 13.0 | 20.0 | NA  |
| 2017 | SUS | MO17 | 25 | KWS103                | 10.0 | 8.0  | NA  |
| 2017 | SUS | MO17 | 26 | KWS114                | 10.0 | 10.0 | NA  |
| 2017 | SUS | MO17 | 27 | KWS122                | 12.0 | 5.0  | NA  |
| 2017 | SUS | MO17 | 28 | KWS133                | 13.0 | 18.0 | NA  |
| 2017 | SUS | MO17 | 29 | KWS141                | 11.0 | 5.0  | NA  |
| 2017 | SUS | MO17 | 30 | LA08265C-50           | 14.0 | 15.0 | NA  |
| 2017 | SUS | MO17 | 31 | LA09101UB-48-3-5      | 10.0 | 8.0  | NA  |
| 2017 | SUS | MO17 | 32 | LW08049C-74-2-5       | 10.0 | 8.0  | NA  |
| 2017 | SUS | MO17 | 33 | LA10081C-18           | 17.0 | 15.0 | NA  |
| 2017 | SUS | MO17 | 34 | LA11309GS-16          | 16.0 | 13.0 | NA  |
| 2017 | SUS | MO17 | 35 | NC13-23443            | 9.0  | 8.0  | NA  |
| 2017 | SUS | MO17 | 36 | NC13-21213            | 17.0 | 40.0 | NA  |
| 2017 | SUS | MO17 | 37 | NC13-20332            | 18.0 | 13.0 | NA  |
| 2017 | SUS | MO17 | 38 | NC14-23372            | 15.0 | 10.0 | NA  |
| 2017 | SUS | MO17 | 39 | NC14-23373            | 16.0 | 5.0  | NA  |
| 2017 | SUS | MO17 | 40 | VA13W-174             | 7.0  | 8.0  | NA  |
| 2017 | SUS | MO17 | 41 | VA09MAS2-131-6-2      | 10.0 | 10.0 | NA  |
| 2017 | SUS | MO17 | 42 | VA14W-32              | 19.0 | 8.0  | NA  |
| 2017 | SUS | MO17 | 43 | VA07MAS1-7047-1-1-4-2 | 10.0 | 10.0 | NA  |
| 2017 | SUS | MO17 | 44 | DH12SRW056-058        | 14.0 | 5.0  | NA  |
| 2017 | SUS | MO17 | 45 | DH11SRW061-16         | 10.0 | 13.0 | NA  |
| 2017 | SUS | MO17 | 46 | VA09MAS2-131-6-2-4    | 21.0 | 13.0 | NA  |
| 2017 | SUS | VA17 | 1  | ERNIE                 | 12.0 | 18.0 | 0.6 |
| 2017 | SUS | VA17 | 2  | COKER9835             | 44.0 | 46.0 | 3.2 |
| 2017 | SUS | VA17 | 3  | BESS                  | 18.0 | 18.0 | 1.1 |
| 2017 | SUS | VA17 | 4  | JAMESTOWN             | 10.0 | 25.0 | 0.8 |

|      |     |      |    |                       |      |      |     |
|------|-----|------|----|-----------------------|------|------|-----|
| 2017 | SUS | VA17 | 5  | NC13-20076            | 11.0 | 18.0 | 0.4 |
| 2017 | SUS | VA17 | 6  | VA13W-38              | 16.0 | 27.0 | 1.4 |
| 2017 | SUS | VA17 | 7  | ARLA07133C-19-4       | 33.0 | 27.5 | 1.7 |
| 2017 | SUS | VA17 | 8  | ARLA07133C-3-4        | 40.0 | 31.0 | 2.2 |
| 2017 | SUS | VA17 | 9  | ARLA06146E-1-4        | 9.0  | 15.5 | 0.8 |
| 2017 | SUS | VA17 | 10 | AR08109-17-2          | 38.0 | 26.5 | 1.8 |
| 2017 | SUS | VA17 | 11 | AR08015-17-4          | 36.0 | 32.0 | 2.2 |
| 2017 | SUS | VA17 | 12 | AR08057-5-1           | 35.0 | 28.0 | 2.9 |
| 2017 | SUS | VA17 | 13 | LES15-5369            | 16.0 | 23.0 | 1.3 |
| 2017 | SUS | VA17 | 14 | LES15-5499            | 52.0 | 18.5 | 1.8 |
| 2017 | SUS | VA17 | 15 | LES15-5605            | 40.0 | 24.5 | 0.9 |
| 2017 | SUS | VA17 | 16 | GA09343-16ES3         | 39.0 | 51.0 | 3.1 |
| 2017 | SUS | VA17 | 17 | GA09410-16ES22        | 29.0 | 38.5 | 5.3 |
| 2017 | SUS | VA17 | 18 | GA09129-16EL56        | 21.0 | 29.5 | 1.6 |
| 2017 | SUS | VA17 | 19 | GA121176-16JS49       | 27.0 | 49.0 | 3.4 |
| 2017 | SUS | VA17 | 20 | GA09163-16ES19        | 30.0 | 19.5 | 5.6 |
| 2017 | SUS | VA17 | 21 | GA09144-16ES23        | 21.0 | 40.0 | 1.6 |
| 2017 | SUS | VA17 | 22 | GA05450-16ES8         | 26.0 | 33.0 | 2.6 |
| 2017 | SUS | VA17 | 23 | GA09054-16ES25        | 18.0 | 31.0 | 1.1 |
| 2017 | SUS | VA17 | 24 | KWS095                | 34.0 | 33.0 | 1.6 |
| 2017 | SUS | VA17 | 25 | KWS103                | 38.0 | 38.5 | 1.7 |
| 2017 | SUS | VA17 | 26 | KWS114                | 47.0 | 37.0 | 2.8 |
| 2017 | SUS | VA17 | 27 | KWS122                | 24.0 | 16.0 | 0.8 |
| 2017 | SUS | VA17 | 28 | KWS133                | 46.0 | 23.5 | 2.2 |
| 2017 | SUS | VA17 | 29 | KWS141                | 17.0 | 20.5 | 1.5 |
| 2017 | SUS | VA17 | 30 | LA08265C-50           | 15.0 | 31.0 | 0.9 |
| 2017 | SUS | VA17 | 31 | LA09101UB-48-3-5      | 19.0 | 25.0 | 1.0 |
| 2017 | SUS | VA17 | 32 | LW08049C-74-2-5       | 47.0 | 21.5 | 1.6 |
| 2017 | SUS | VA17 | 33 | LA10081C-18           | 14.0 | 25.5 | 1.3 |
| 2017 | SUS | VA17 | 34 | LA11309GS-16          | 10.0 | 29.0 | 1.1 |
| 2017 | SUS | VA17 | 35 | NC13-23443            | 21.0 | 27.5 | 0.8 |
| 2017 | SUS | VA17 | 36 | NC13-21213            | 42.0 | 29.0 | 1.4 |
| 2017 | SUS | VA17 | 37 | NC13-20332            | 29.0 | 34.0 | 1.6 |
| 2017 | SUS | VA17 | 38 | NC14-23372            | 13.0 | 23.0 | 0.7 |
| 2017 | SUS | VA17 | 39 | NC14-23373            | 13.0 | 27.0 | 0.7 |
| 2017 | SUS | VA17 | 40 | VA13W-174             | 12.0 | 34.5 | 0.8 |
| 2017 | SUS | VA17 | 41 | VA09MAS2-131-6-2      | 22.0 | 35.5 | 1.5 |
| 2017 | SUS | VA17 | 42 | VA14W-32              | 31.0 | 33.0 | 1.7 |
| 2017 | SUS | VA17 | 43 | VA07MAS1-7047-1-1-4-2 | 11.0 | 27.5 | 1.2 |
| 2017 | SUS | VA17 | 44 | DH12SRW056-058        | 18.0 | 31.0 | 2.5 |
| 2017 | SUS | VA17 | 45 | DH11SRW061-16         | 16.0 | 27.0 | 2.4 |
| 2017 | SUS | VA17 | 46 | VA09MAS2-131-6-2-4    | 26.0 | 29.5 | 1.1 |
| 2016 | SUS | VA16 | 1  | ERNIE                 | 9.7  | 48.0 | 1.8 |
| 2016 | SUS | VA16 | 2  | COKER9835             | 39.1 | 63.0 | 7.7 |
| 2016 | SUS | VA16 | 3  | BESS                  | 7.0  | 31.0 | 2.3 |
| 2016 | SUS | VA16 | 4  | JAMESTOWN             | 14.6 | 37.0 | 2.1 |
| 2016 | SUS | VA16 | 5  | AR06024-7-2           | 8.2  | 24.0 | 1.4 |
| 2016 | SUS | VA16 | 6  | ARS10-389             | 6.2  | 38.0 | 0.7 |
| 2016 | SUS | VA16 | 7  | AR07010-7-1           | 11.4 | 32.0 | 3.3 |

|      |     |       |    |                    |      |      |      |
|------|-----|-------|----|--------------------|------|------|------|
| 2016 | SUS | VA16  | 8  | AR07053-13-1       | 11.7 | 28.0 | 3.1  |
| 2016 | SUS | VA16  | 9  | AR07078-7-4        | 24.8 | 30.0 | 3.8  |
| 2016 | SUS | VA16  | 10 | AR07108-6-1        | 8.4  | 25.0 | 1.7  |
| 2016 | SUS | VA16  | 11 | ARLA06146E-20-1    | 10.5 | 31.0 | 1.8  |
| 2016 | SUS | VA16  | 12 | ARLA07084C-10-1    | 9.3  | 39.0 | 3.4  |
| 2016 | SUS | VA16  | 13 | ARS11-2086         | 15.9 | 45.0 | 4.3  |
| 2016 | SUS | VA16  | 14 | ARS12-201          | 10.7 | 32.0 | 2.9  |
| 2016 | SUS | VA16  | 15 | ARS13-159          | 9.3  | 56.0 | 1.1  |
| 2016 | SUS | VA16  | 16 | ARS13-215          | 39.1 | 49.0 | 13.4 |
| 2016 | SUS | VA16  | 17 | ARS14W0539         | 12.5 | 52.0 | 5.7  |
| 2016 | SUS | VA16  | 18 | ARS14W0623         | 14.3 | 61.0 | 4.6  |
| 2016 | SUS | VA16  | 19 | ARS14W1012         | 11.4 | 72.0 | 3.0  |
| 2016 | SUS | VA16  | 20 | ES14-0057          | 11.8 | 25.0 | 1.8  |
| 2016 | SUS | VA16  | 21 | ES14-0528          | 10.5 | 42.0 | 1.3  |
| 2016 | SUS | VA16  | 22 | ES14-1293          | 18.4 | 27.0 | 1.7  |
| 2016 | SUS | VA16  | 23 | ES14-1350          | 14.5 | 24.0 | 0.9  |
| 2016 | SUS | VA16  | 24 | GA08250-15ES14     | 11.0 | 21.0 | 2.2  |
| 2016 | SUS | VA16  | 25 | GA08293-15ES3      | 22.9 | 50.0 | 4.4  |
| 2016 | SUS | VA16  | 26 | GA09361-15ES38     | 31.7 | 52.0 | 5.6  |
| 2016 | SUS | VA16  | 27 | GA091252-15ES35    | 14.0 | 39.0 | 7.0  |
| 2016 | SUS | VA16  | 28 | GA08281-15ES1      | 20.4 | 38.0 | 5.1  |
| 2016 | SUS | VA16  | 29 | GANC9337-15ES27    | 7.0  | 23.0 | 1.5  |
| 2016 | SUS | VA16  | 30 | GA09343-15ES33     | 17.8 | 43.0 | 5.9  |
| 2016 | SUS | VA16  | 31 | GANC10014-15ES24   | 20.1 | 63.0 | 4.8  |
| 2016 | SUS | VA16  | 32 | KWS053             | 9.9  | 26.0 | 3.4  |
| 2016 | SUS | VA16  | 33 | KWS060             | 20.7 | 54.0 | 0.9  |
| 2016 | SUS | VA16  | 34 | KWS074             | 15.4 | 35.0 | 2.9  |
| 2016 | SUS | VA16  | 35 | KWS081             | 10.5 | 47.0 | 1.7  |
| 2016 | SUS | VA16  | 36 | KWS083             | 13.0 | 14.0 | 3.6  |
| 2016 | SUS | VA16  | 37 | KWS087             | 9.8  | 35.0 | 2.2  |
| 2016 | SUS | VA16  | 38 | LA06146E-P4        | 10.6 | 42.0 | 5.8  |
| 2016 | SUS | VA16  | 39 | LA08090C-9-2       | 15.1 | 28.0 | 4.7  |
| 2016 | SUS | VA16  | 40 | LA08265C-50        | 24.9 | 44.0 | 3.1  |
| 2016 | SUS | VA16  | 41 | LA09011UB-2        | 20.6 | 51.0 | 4.0  |
| 2016 | SUS | VA16  | 42 | LA09225C-33        | 33.3 | 55.0 | 4.6  |
| 2016 | SUS | VA16  | 43 | NC10435-11         | 15.8 | 19.0 | 2.9  |
| 2016 | SUS | VA16  | 44 | NC12-22225         | 11.1 | 24.0 | 1.9  |
| 2016 | SUS | VA16  | 45 | NC13-20076         | 8.5  | 12.0 | 1.0  |
| 2016 | SUS | VA16  | 46 | NC13-22350         | 9.5  | 31.0 | 1.3  |
| 2016 | SUS | VA16  | 47 | NC13-23449         | 14.0 | 18.0 | 2.9  |
| 2016 | SUS | VA16  | 48 | VA12W-68           | 17.8 | 44.0 | 7.3  |
| 2016 | SUS | VA16  | 49 | VA13W-38           | 15.0 | 26.0 | 1.7  |
| 2016 | SUS | VA16  | 50 | VA09MAS6-122-7-1   | 25.0 | 28.0 | 2.6  |
| 2016 | SUS | VA16  | 51 | VA08MAS1-188-6-4-1 | 13.4 | 42.0 | 2.1  |
| 2016 | SUS | VA16  | 52 | VA13FHB-26         | 18.3 | 32.0 | 3.4  |
| 2016 | SUS | VA16  | 53 | VA14FHB-14         | 12.2 | 20.0 | 1.4  |
| 2016 | SUS | VA16  | 54 | VA14FHB-13         | 10.9 | 26.0 | 2.6  |
| 2016 | SUS | VA16  | 55 | VA14FHB-28         | 32.5 | 40.0 | 4.6  |
| 2016 | SUS | FAR16 | 1  | ERNIE              | 43.3 | 26.7 | 1.9  |



|      |     |       |    |                  |      |      |      |
|------|-----|-------|----|------------------|------|------|------|
| 2016 | SUS | FAR16 | 2  | COKER9835        | 95.0 | 45.0 | 2.8  |
| 2016 | SUS | FAR16 | 3  | BESS             | 6.7  | 1.0  | 2.0  |
| 2016 | SUS | FAR16 | 4  | JAMESTOWN        | NA   | 1.3  | 1.4  |
| 2016 | SUS | FAR16 | 5  | AR06024-7-2      | 1.7  | 1.3  | 2.1  |
| 2016 | SUS | FAR16 | 6  | ARS10-389        | 1.7  | 1.3  | 1.0  |
| 2016 | SUS | FAR16 | 7  | AR07010-7-1      | 1.7  | 2.3  | 5.7  |
| 2016 | SUS | FAR16 | 8  | AR07053-13-1     | 5.0  | 13.3 | 7.6  |
| 2016 | SUS | FAR16 | 9  | AR07078-7-4      | 3.3  | 8.0  | 6.9  |
| 2016 | SUS | FAR16 | 10 | AR07108-6-1      | 3.3  | 2.7  | 5.6  |
| 2016 | SUS | FAR16 | 11 | ARLA06146E-20-1  | 6.7  | 14.0 | 4.2  |
| 2016 | SUS | FAR16 | 12 | ARLA07084C-10-1  | 3.3  | 1.3  | 3.3  |
| 2016 | SUS | FAR16 | 13 | ARS11-2086       | 98.3 | 78.3 | 3.0  |
| 2016 | SUS | FAR16 | 14 | ARS12-201        | 98.3 | 76.7 | 4.1  |
| 2016 | SUS | FAR16 | 15 | ARS13-159        | 46.7 | 83.3 | 1.5  |
| 2016 | SUS | FAR16 | 16 | ARS13-215        | 1.7  | 2.7  | 7.7  |
| 2016 | SUS | FAR16 | 17 | ARS14W0539       | NA   | 1.7  | 3.4  |
| 2016 | SUS | FAR16 | 18 | ARS14W0623       | 16.7 | 66.7 | 10.5 |
| 2016 | SUS | FAR16 | 19 | ARS14W1012       | 3.3  | 6.3  | 2.0  |
| 2016 | SUS | FAR16 | 20 | ES14-0057        | 21.7 | 37.7 | 3.6  |
| 2016 | SUS | FAR16 | 21 | ES14-0528        | 43.3 | 60.0 | 1.7  |
| 2016 | SUS | FAR16 | 22 | ES14-1293        | 1.7  | 4.0  | 3.1  |
| 2016 | SUS | FAR16 | 23 | ES14-1350        | 78.3 | 85.0 | 2.0  |
| 2016 | SUS | FAR16 | 24 | GA08250-15ES14   | NA   | 0.7  | 1.0  |
| 2016 | SUS | FAR16 | 25 | GA08293-15ES3    | NA   | 1.7  | 0.8  |
| 2016 | SUS | FAR16 | 26 | GA09361-15ES38   | NA   | 2.7  | 2.6  |
| 2016 | SUS | FAR16 | 27 | GA091252-15ES35  | 20.0 | 5.7  | 1.6  |
| 2016 | SUS | FAR16 | 28 | GA08281-15ES1    | 5.0  | 4.0  | 1.9  |
| 2016 | SUS | FAR16 | 29 | GANC9337-15ES27  | NA   | 1.0  | 0.5  |
| 2016 | SUS | FAR16 | 30 | GA09343-15ES33   | 5.0  | 2.3  | 2.9  |
| 2016 | SUS | FAR16 | 31 | GANC10014-15ES24 | 3.3  | 6.0  | 2.7  |
| 2016 | SUS | FAR16 | 32 | KWS053           | 1.7  | 3.7  | 0.6  |
| 2016 | SUS | FAR16 | 33 | KWS060           | 5.0  | 11.0 | 1.6  |
| 2016 | SUS | FAR16 | 34 | KWS074           | 16.7 | 63.3 | 2.4  |
| 2016 | SUS | FAR16 | 35 | KWS081           | 3.3  | 26.7 | 1.4  |
| 2016 | SUS | FAR16 | 36 | KWS083           | 10.0 | 31.7 | 4.3  |
| 2016 | SUS | FAR16 | 37 | KWS087           | 8.3  | 20.7 | 2.5  |
| 2016 | SUS | FAR16 | 38 | LA06146E-P4      | NA   | 1.0  | 1.0  |
| 2016 | SUS | FAR16 | 39 | LA08090C-9-2     | 3.3  | 5.0  | 2.7  |
| 2016 | SUS | FAR16 | 40 | LA08265C-50      | 1.7  | 0.7  | 0.9  |
| 2016 | SUS | FAR16 | 41 | LA09011UB-2      | 1.7  | 5.0  | 2.1  |
| 2016 | SUS | FAR16 | 42 | LA09225C-33      | 5.0  | 6.7  | 3.5  |
| 2016 | SUS | FAR16 | 43 | NC10435-11       | NA   | 3.0  | 1.7  |
| 2016 | SUS | FAR16 | 44 | NC12-22225       | 35.0 | 50.0 | 2.3  |
| 2016 | SUS | FAR16 | 45 | NC13-20076       | NA   | 0.3  | 0.9  |
| 2016 | SUS | FAR16 | 46 | NC13-22350       | 21.7 | 37.7 | 1.5  |
| 2016 | SUS | FAR16 | 47 | NC13-23449       | 93.3 | 77.5 | 2.8  |
| 2016 | SUS | FAR16 | 48 | VA12W-68         | NA   | 4.0  | 2.6  |
| 2016 | SUS | FAR16 | 49 | VA13W-38         | 33.3 | 36.7 | 1.4  |
| 2016 | SUS | FAR16 | 50 | VA09MAS6-122-7-1 | 1.7  | 1.0  | 2.0  |

|      |     |       |    |                    |      |      |      |
|------|-----|-------|----|--------------------|------|------|------|
| 2016 | SUS | FAR16 | 51 | VA08MAS1-188-6-4-1 | 8.3  | 7.7  | 2.0  |
| 2016 | SUS | FAR16 | 52 | VA13FHB-26         | 50.0 | 76.7 | 1.9  |
| 2016 | SUS | FAR16 | 53 | VA14FHB-14         | 96.7 | 80.0 | 1.3  |
| 2016 | SUS | FAR16 | 54 | VA14FHB-13         | 96.7 | 85.0 | 1.6  |
| 2016 | SUS | FAR16 | 55 | VA14FHB-28         | 3.3  | 6.7  | 2.1  |
| 2016 | SUS | NAR16 | 1  | ERNIE              | 13.3 | 34.0 | 7.0  |
| 2016 | SUS | NAR16 | 2  | COKER9835          | 38.3 | 80.0 | 14.0 |
| 2016 | SUS | NAR16 | 3  | BESS               | 3.3  | 3.0  | 4.0  |
| 2016 | SUS | NAR16 | 4  | JAMESTOWN          | 5.0  | 33.7 | 8.0  |
| 2016 | SUS | NAR16 | 5  | AR06024-7-2        | 5.0  | 19.0 | 5.0  |
| 2016 | SUS | NAR16 | 6  | ARS10-389          | 3.3  | 17.7 | 5.0  |
| 2016 | SUS | NAR16 | 7  | AR07010-7-1        | 5.0  | 26.0 | 10.0 |
| 2016 | SUS | NAR16 | 8  | AR07053-13-1       | 8.3  | 41.7 | 13.0 |
| 2016 | SUS | NAR16 | 9  | AR07078-7-4        | 6.7  | 30.0 | 11.0 |
| 2016 | SUS | NAR16 | 10 | AR07108-6-1        | NA   | 6.0  | 6.0  |
| 2016 | SUS | NAR16 | 11 | ARLA06146E-20-1    | NA   | 35.0 | 7.0  |
| 2016 | SUS | NAR16 | 12 | ARLA07084C-10-1    | 5.0  | 18.3 | 9.0  |
| 2016 | SUS | NAR16 | 13 | ARS11-2086         | 5.0  | 63.3 | 11.0 |
| 2016 | SUS | NAR16 | 14 | ARS12-201          | 5.0  | 48.3 | 11.0 |
| 2016 | SUS | NAR16 | 15 | ARS13-159          | 3.3  | 46.7 | 8.0  |
| 2016 | SUS | NAR16 | 16 | ARS13-215          | 6.7  | 43.3 | 26.0 |
| 2016 | SUS | NAR16 | 17 | ARS14W0539         | 3.3  | 53.3 | 9.0  |
| 2016 | SUS | NAR16 | 18 | ARS14W0623         | NA   | 73.3 | 26.0 |
| 2016 | SUS | NAR16 | 19 | ARS14W1012         | 5.0  | 85.0 | 9.0  |
| 2016 | SUS | NAR16 | 20 | ES14-0057          | 3.3  | 10.0 | 6.0  |
| 2016 | SUS | NAR16 | 21 | ES14-0528          | 6.7  | 30.0 | 6.0  |
| 2016 | SUS | NAR16 | 22 | ES14-1293          | 3.3  | 9.3  | 5.0  |
| 2016 | SUS | NAR16 | 23 | ES14-1350          | NA   | 21.7 | 4.0  |
| 2016 | SUS | NAR16 | 24 | GA08250-15ES14     | 1.7  | 9.3  | 7.0  |
| 2016 | SUS | NAR16 | 25 | GA08293-15ES3      | 16.7 | 48.7 | 8.0  |
| 2016 | SUS | NAR16 | 26 | GA09361-15ES38     | 13.3 | 36.7 | 14.0 |
| 2016 | SUS | NAR16 | 27 | GA091252-15ES35    | 6.7  | 43.3 | 10.0 |
| 2016 | SUS | NAR16 | 28 | GA08281-15ES1      | 6.7  | 21.7 | 7.0  |
| 2016 | SUS | NAR16 | 29 | GANC9337-15ES27    | 3.3  | 18.3 | 6.0  |
| 2016 | SUS | NAR16 | 30 | GA09343-15ES33     | 8.3  | 48.3 | 9.0  |
| 2016 | SUS | NAR16 | 31 | GANC10014-15ES24   | 3.3  | 53.3 | 10.0 |
| 2016 | SUS | NAR16 | 32 | KWS053             | 1.7  | 15.7 | 4.0  |
| 2016 | SUS | NAR16 | 33 | KWS060             | 5.0  | 8.0  | 5.0  |
| 2016 | SUS | NAR16 | 34 | KWS074             | 3.3  | 18.3 | 9.0  |
| 2016 | SUS | NAR16 | 35 | KWS081             | 3.3  | 5.7  | 3.0  |
| 2016 | SUS | NAR16 | 36 | KWS083             | 3.3  | 16.7 | 8.0  |
| 2016 | SUS | NAR16 | 37 | KWS087             | 1.7  | 26.7 | 4.0  |
| 2016 | SUS | NAR16 | 38 | LA06146E-P4        | 10.0 | 51.7 | 10.0 |
| 2016 | SUS | NAR16 | 39 | LA08090C-9-2       | 8.3  | 48.3 | 14.0 |
| 2016 | SUS | NAR16 | 40 | LA08265C-50        | 6.7  | 36.7 | 8.0  |
| 2016 | SUS | NAR16 | 41 | LA09011UB-2        | 18.3 | 61.7 | 13.0 |
| 2016 | SUS | NAR16 | 42 | LA09225C-33        | 8.3  | 40.0 | 11.0 |
| 2016 | SUS | NAR16 | 43 | NC10435-11         | 15.0 | 33.3 | 5.0  |
| 2016 | SUS | NAR16 | 44 | NC12-22225         | 3.3  | 10.0 | 5.0  |

|      |     |       |    |                    |      |      |      |
|------|-----|-------|----|--------------------|------|------|------|
| 2016 | SUS | NAR16 | 45 | NC13-20076         | 5.0  | 6.7  | 3.0  |
| 2016 | SUS | NAR16 | 46 | NC13-22350         | 3.3  | 10.0 | 3.0  |
| 2016 | SUS | NAR16 | 47 | NC13-23449         | 8.3  | 31.7 | 7.0  |
| 2016 | SUS | NAR16 | 48 | VA12W-68           | 6.7  | 56.7 | 16.0 |
| 2016 | SUS | NAR16 | 49 | VA13W-38           | 11.7 | 18.3 | 6.0  |
| 2016 | SUS | NAR16 | 50 | VA09MAS6-122-7-1   | 11.7 | 7.7  | 6.0  |
| 2016 | SUS | NAR16 | 51 | VA08MAS1-188-6-4-1 | 13.3 | 28.3 | 7.0  |
| 2016 | SUS | NAR16 | 52 | VA13FHB-26         | 3.3  | 76.7 | 7.0  |
| 2016 | SUS | NAR16 | 53 | VA14FHB-14         | 63.3 | 85.0 | 6.0  |
| 2016 | SUS | NAR16 | 54 | VA14FHB-13         | 65.0 | 80.3 | 7.0  |
| 2016 | SUS | NAR16 | 55 | VA14FHB-28         | 25.0 | 58.3 | 9.0  |
| 2016 | SUS | IL16  | 1  | ERNIE              | 53.4 | 16.7 | 2.2  |
| 2016 | SUS | IL16  | 2  | COKER9835          | 80.9 | 46.7 | 5.0  |
| 2016 | SUS | IL16  | 3  | BESS               | 49.3 | 21.7 | 0.5  |
| 2016 | SUS | IL16  | 4  | JAMESTOWN          | 37.2 | 33.3 | 2.6  |
| 2016 | SUS | IL16  | 5  | AR06024-7-2        | 47.9 | 70.0 | 1.5  |
| 2016 | SUS | IL16  | 6  | ARS10-389          | 15.8 | 26.7 | 1.2  |
| 2016 | SUS | IL16  | 7  | AR07010-7-1        | 51.1 | 36.7 | 1.2  |
| 2016 | SUS | IL16  | 8  | AR07053-13-1       | 45.5 | 13.3 | 2.1  |
| 2016 | SUS | IL16  | 9  | AR07078-7-4        | 74.5 | 50.0 | 2.7  |
| 2016 | SUS | IL16  | 10 | AR07108-6-1        | 62.3 | 30.0 | 1.2  |
| 2016 | SUS | IL16  | 11 | ARLA06146E-20-1    | 71.0 | 30.0 | 1.0  |
| 2016 | SUS | IL16  | 12 | ARLA07084C-10-1    | NA   | NA   | NA   |
| 2016 | SUS | IL16  | 13 | ARS11-2086         | 30.7 | 63.3 | 1.3  |
| 2016 | SUS | IL16  | 14 | ARS12-201          | 37.6 | 35.0 | 1.5  |
| 2016 | SUS | IL16  | 15 | ARS13-159          | 67.5 | 20.0 | 0.8  |
| 2016 | SUS | IL16  | 16 | ARS13-215          | NA   | NA   | NA   |
| 2016 | SUS | IL16  | 17 | ARS14W0539         | 15.7 | 66.7 | 2.2  |
| 2016 | SUS | IL16  | 18 | ARS14W0623         | 50.3 | 6.1  | 1.5  |
| 2016 | SUS | IL16  | 19 | ARS14W1012         | 67.4 | 36.7 | 3.8  |
| 2016 | SUS | IL16  | 20 | ES14-0057          | 54.4 | 26.7 | 1.1  |
| 2016 | SUS | IL16  | 21 | ES14-0528          | 20.2 | 10.0 | 1.7  |
| 2016 | SUS | IL16  | 22 | ES14-1293          | 33.2 | 50.0 | 0.8  |
| 2016 | SUS | IL16  | 23 | ES14-1350          | 71.8 | 60.0 | 2.0  |
| 2016 | SUS | IL16  | 24 | GA08250-15ES14     | 49.9 | 23.3 | 2.1  |
| 2016 | SUS | IL16  | 25 | GA08293-15ES3      | 62.7 | 66.7 | 6.1  |
| 2016 | SUS | IL16  | 26 | GA09361-15ES38     | 75.5 | 18.4 | 2.1  |
| 2016 | SUS | IL16  | 27 | GA091252-15ES35    | 70.6 | 68.6 | 4.2  |
| 2016 | SUS | IL16  | 28 | GA08281-15ES1      | 68.6 | 48.8 | 2.6  |
| 2016 | SUS | IL16  | 29 | GANC9337-15ES27    | 47.6 | 20.6 | 4.2  |
| 2016 | SUS | IL16  | 30 | GA09343-15ES33     | 73.3 | 30.8 | 5.3  |
| 2016 | SUS | IL16  | 31 | GANC10014-15ES24   | 44.6 | 36.7 | 2.9  |
| 2016 | SUS | IL16  | 32 | KWS053             | 22.3 | 33.6 | 2.2  |
| 2016 | SUS | IL16  | 33 | KWS060             | 57.5 | 13.3 | 2.0  |
| 2016 | SUS | IL16  | 34 | KWS074             | 33.7 | 8.3  | 1.0  |
| 2016 | SUS | IL16  | 35 | KWS081             | 60.6 | 30.0 | 0.7  |
| 2016 | SUS | IL16  | 36 | KWS083             | 43.6 | 30.0 | 1.1  |
| 2016 | SUS | IL16  | 37 | KWS087             | 55.4 | 30.0 | 2.2  |
| 2016 | SUS | IL16  | 38 | LA06146E-P4        | NA   | NA   | NA   |

|      |     |      |    |                    |      |      |      |
|------|-----|------|----|--------------------|------|------|------|
| 2016 | SUS | IL16 | 39 | LA08090C-9-2       | 64.4 | 70.0 | 2.6  |
| 2016 | SUS | IL16 | 40 | LA08265C-50        | 57.8 | 36.7 | 3.1  |
| 2016 | SUS | IL16 | 41 | LA09011UB-2        | 32.9 | 70.0 | 6.8  |
| 2016 | SUS | IL16 | 42 | LA09225C-33        | 69.3 | 25.8 | 2.2  |
| 2016 | SUS | IL16 | 43 | NC10435-11         | 64.2 | 30.0 | 3.1  |
| 2016 | SUS | IL16 | 44 | NC12-22225         | 40.6 | 26.7 | 0.9  |
| 2016 | SUS | IL16 | 45 | NC13-20076         | 36.0 | 16.7 | 3.0  |
| 2016 | SUS | IL16 | 46 | NC13-22350         | 31.0 | 46.7 | 1.0  |
| 2016 | SUS | IL16 | 47 | NC13-23449         | 61.0 | 50.0 | 2.1  |
| 2016 | SUS | IL16 | 48 | VA12W-68           | 37.2 | 20.8 | 6.6  |
| 2016 | SUS | IL16 | 49 | VA13W-38           | 17.2 | 21.7 | 1.0  |
| 2016 | SUS | IL16 | 50 | VA09MAS6-122-7-1   | 48.0 | 53.3 | 5.3  |
| 2016 | SUS | IL16 | 51 | VA08MAS1-188-6-4-1 | 57.8 | 76.7 | 2.0  |
| 2016 | SUS | IL16 | 52 | VA13FHB-26         | 27.2 | 26.7 | 2.3  |
| 2016 | SUS | IL16 | 53 | VA14FHB-14         | 42.3 | 43.3 | 1.6  |
| 2016 | SUS | IL16 | 54 | VA14FHB-13         | 24.8 | 36.7 | 3.5  |
| 2016 | SUS | IL16 | 55 | VA14FHB-28         | 62.1 | 40.0 | 3.8  |
| 2016 | SUS | KY16 | 1  | ERNIE              | 30.0 | 33.0 | 15.5 |
| 2016 | SUS | KY16 | 2  | COKER9835          | 62.8 | 43.0 | 23.1 |
| 2016 | SUS | KY16 | 3  | BESS               | 15.3 | 14.0 | 4.6  |
| 2016 | SUS | KY16 | 4  | JAMESTOWN          | 34.4 | 27.0 | 10.2 |
| 2016 | SUS | KY16 | 5  | AR06024-7-2        | 17.6 | 9.0  | 2.2  |
| 2016 | SUS | KY16 | 6  | ARS10-389          | 31.1 | 16.0 | 7.8  |
| 2016 | SUS | KY16 | 7  | AR07010-7-1        | 31.3 | 27.0 | 9.8  |
| 2016 | SUS | KY16 | 8  | AR07053-13-1       | 17.9 | 29.0 | 8.1  |
| 2016 | SUS | KY16 | 9  | AR07078-7-4        | 40.3 | 42.0 | 9.1  |
| 2016 | SUS | KY16 | 10 | AR07108-6-1        | 28.6 | 31.0 | 8.6  |
| 2016 | SUS | KY16 | 11 | ARLA06146E-20-1    | 20.4 | 28.0 | 8.9  |
| 2016 | SUS | KY16 | 12 | ARLA07084C-10-1    | 18.8 | 31.0 | 5.0  |
| 2016 | SUS | KY16 | 13 | ARS11-2086         | 32.8 | 31.0 | 12.6 |
| 2016 | SUS | KY16 | 14 | ARS12-201          | 35.0 | 22.0 | 9.2  |
| 2016 | SUS | KY16 | 15 | ARS13-159          | 24.3 | 15.0 | 8.2  |
| 2016 | SUS | KY16 | 16 | ARS13-215          | 42.7 | 27.0 | 8.0  |
| 2016 | SUS | KY16 | 17 | ARS14W0539         | 36.8 | 11.0 | 12.6 |
| 2016 | SUS | KY16 | 18 | ARS14W0623         | 19.0 | 21.0 | 8.9  |
| 2016 | SUS | KY16 | 19 | ARS14W1012         | 44.0 | 36.0 | 17.3 |
| 2016 | SUS | KY16 | 20 | ES14-0057          | 21.3 | 25.0 | 7.6  |
| 2016 | SUS | KY16 | 21 | ES14-0528          | 25.5 | 24.0 | 7.4  |
| 2016 | SUS | KY16 | 22 | ES14-1293          | 16.3 | 16.0 | 4.6  |
| 2016 | SUS | KY16 | 23 | ES14-1350          | 21.1 | 12.0 | 8.0  |
| 2016 | SUS | KY16 | 24 | GA08250-15ES14     | 22.3 | 23.0 | 7.2  |
| 2016 | SUS | KY16 | 25 | GA08293-15ES3      | 40.7 | 47.0 | 21.6 |
| 2016 | SUS | KY16 | 26 | GA09361-15ES38     | 45.9 | 38.0 | 11.9 |
| 2016 | SUS | KY16 | 27 | GA091252-15ES35    | 32.6 | 31.0 | 15.5 |
| 2016 | SUS | KY16 | 28 | GA08281-15ES1      | 30.3 | 28.0 | 8.3  |
| 2016 | SUS | KY16 | 29 | GANC9337-15ES27    | 30.1 | 17.0 | 7.6  |
| 2016 | SUS | KY16 | 30 | GA09343-15ES33     | 45.6 | 24.0 | 11.2 |
| 2016 | SUS | KY16 | 31 | GANC10014-15ES24   | 40.1 | 32.0 | 13.2 |
| 2016 | SUS | KY16 | 32 | KWS053             | 26.9 | 23.0 | 10.0 |

|      |     |      |    |                    |      |      |      |
|------|-----|------|----|--------------------|------|------|------|
| 2016 | SUS | KY16 | 33 | KWS060             | 27.2 | 23.0 | 10.6 |
| 2016 | SUS | KY16 | 34 | KWS074             | 19.9 | 47.0 | 9.2  |
| 2016 | SUS | KY16 | 35 | KWS081             | 18.4 | 16.0 | 6.8  |
| 2016 | SUS | KY16 | 36 | KWS083             | 23.4 | 31.0 | 9.1  |
| 2016 | SUS | KY16 | 37 | KWS087             | 24.7 | 18.0 | 6.8  |
| 2016 | SUS | KY16 | 38 | LA06146E-P4        | 35.5 | 27.0 | 10.7 |
| 2016 | SUS | KY16 | 39 | LA08090C-9-2       | 31.9 | 19.0 | 5.7  |
| 2016 | SUS | KY16 | 40 | LA08265C-50        | 29.8 | 22.0 | 7.6  |
| 2016 | SUS | KY16 | 41 | LA09011UB-2        | 31.7 | 31.0 | 13.2 |
| 2016 | SUS | KY16 | 42 | LA09225C-33        | 32.8 | 36.0 | 12.0 |
| 2016 | SUS | KY16 | 43 | NC10435-11         | 29.1 | 23.0 | 9.4  |
| 2016 | SUS | KY16 | 44 | NC12-22225         | 25.4 | 18.0 | 8.8  |
| 2016 | SUS | KY16 | 45 | NC13-20076         | 24.8 | 17.0 | 7.5  |
| 2016 | SUS | KY16 | 46 | NC13-22350         | 21.8 | 12.0 | 10.9 |
| 2016 | SUS | KY16 | 47 | NC13-23449         | 29.9 | 25.0 | 9.2  |
| 2016 | SUS | KY16 | 48 | VA12W-68           | 33.7 | 40.0 | 13.3 |
| 2016 | SUS | KY16 | 49 | VA13W-38           | 35.9 | 27.0 | 5.9  |
| 2016 | SUS | KY16 | 50 | VA09MAS6-122-7-1   | 28.9 | 31.0 | 12.7 |
| 2016 | SUS | KY16 | 51 | VA08MAS1-188-6-4-1 | 25.6 | 22.0 | 10.4 |
| 2016 | SUS | KY16 | 52 | VA13FHB-26         | 21.6 | 25.0 | 10.2 |
| 2016 | SUS | KY16 | 53 | VA14FHB-14         | 23.2 | 21.0 | 7.9  |
| 2016 | SUS | KY16 | 54 | VA14FHB-13         | 27.1 | 41.0 | 10.3 |
| 2016 | SUS | KY16 | 55 | VA14FHB-28         | 38.3 | 35.0 | 11.4 |
| 2016 | SUS | MO16 | 1  | ERNIE              | 15.0 | 32.5 | 9.0  |
| 2016 | SUS | MO16 | 2  | COKER9835          | 34.0 | 80.0 | 16.0 |
| 2016 | SUS | MO16 | 3  | BESS               | 15.0 | 25.0 | 9.0  |
| 2016 | SUS | MO16 | 4  | JAMESTOWN          | 19.0 | 27.5 | 13.0 |
| 2016 | SUS | MO16 | 5  | AR06024-7-2        | 13.0 | 17.5 | 10.0 |
| 2016 | SUS | MO16 | 6  | ARS10-389          | 19.0 | 35.0 | 16.0 |
| 2016 | SUS | MO16 | 7  | AR07010-7-1        | 17.0 | 22.5 | 23.0 |
| 2016 | SUS | MO16 | 8  | AR07053-13-1       | 24.0 | 12.5 | 17.0 |
| 2016 | SUS | MO16 | 9  | AR07078-7-4        | 23.0 | 27.5 | 33.0 |
| 2016 | SUS | MO16 | 10 | AR07108-6-1        | 17.0 | 25.0 | 16.0 |
| 2016 | SUS | MO16 | 11 | ARLA06146E-20-1    | 17.0 | 35.0 | 19.0 |
| 2016 | SUS | MO16 | 12 | ARLA07084C-10-1    | 12.0 | 37.5 | 32.0 |
| 2016 | SUS | MO16 | 13 | ARS11-2086         | 10.0 | 80.0 | 18.0 |
| 2016 | SUS | MO16 | 14 | ARS12-201          | 15.0 | 82.5 | 17.0 |
| 2016 | SUS | MO16 | 15 | ARS13-159          | 23.0 | 80.0 | 9.3  |
| 2016 | SUS | MO16 | 16 | ARS13-215          | 13.0 | 25.0 | 27.8 |
| 2016 | SUS | MO16 | 17 | ARS14W0539         | 15.0 | 30.0 | 32.7 |
| 2016 | SUS | MO16 | 18 | ARS14W0623         | 19.0 | 52.5 | 16.4 |
| 2016 | SUS | MO16 | 19 | ARS14W1012         | 24.0 | 35.0 | 28.1 |
| 2016 | SUS | MO16 | 20 | ES14-0057          | 8.0  | 22.5 | 2.7  |
| 2016 | SUS | MO16 | 21 | ES14-0528          | 15.0 | 30.0 | 13.6 |
| 2016 | SUS | MO16 | 22 | ES14-1293          | 10.0 | 10.0 | 6.5  |
| 2016 | SUS | MO16 | 23 | ES14-1350          | 25.0 | 87.5 | 14.9 |
| 2016 | SUS | MO16 | 24 | GA08250-15ES14     | 13.0 | 12.5 | 14.6 |
| 2016 | SUS | MO16 | 25 | GA08293-15ES3      | 20.0 | 30.0 | 21.3 |
| 2016 | SUS | MO16 | 26 | GA09361-15ES38     | 29.0 | 32.5 | 17.2 |

|      |     |      |    |                    |      |      |      |
|------|-----|------|----|--------------------|------|------|------|
| 2016 | SUS | MO16 | 27 | GA091252-15ES35    | 11.0 | 22.5 | 18.8 |
| 2016 | SUS | MO16 | 28 | GA08281-15ES1      | 22.0 | 35.0 | 16.3 |
| 2016 | SUS | MO16 | 29 | GANC9337-15ES27    | 21.0 | 17.5 | 19.8 |
| 2016 | SUS | MO16 | 30 | GA09343-15ES33     | 12.0 | 30.0 | 18.6 |
| 2016 | SUS | MO16 | 31 | GANC10014-15ES24   | 24.0 | 40.0 | 15.6 |
| 2016 | SUS | MO16 | 32 | KWS053             | 9.0  | 12.5 | 8.7  |
| 2016 | SUS | MO16 | 33 | KWS060             | 12.0 | 28.0 | 9.0  |
| 2016 | SUS | MO16 | 34 | KWS074             | 21.0 | 35.0 | 19.0 |
| 2016 | SUS | MO16 | 35 | KWS081             | 10.0 | 38.0 | 15.0 |
| 2016 | SUS | MO16 | 36 | KWS083             | 9.0  | 18.0 | 10.0 |
| 2016 | SUS | MO16 | 37 | KWS087             | 25.0 | 50.0 | 14.0 |
| 2016 | SUS | MO16 | 38 | LA06146E-P4        | 28.0 | 45.0 | 17.0 |
| 2016 | SUS | MO16 | 39 | LA08090C-9-2       | 33.0 | 40.0 | 28.0 |
| 2016 | SUS | MO16 | 40 | LA08265C-50        | 40.0 | 40.0 | 15.0 |
| 2016 | SUS | MO16 | 41 | LA09011UB-2        | 54.0 | 30.0 | 36.0 |
| 2016 | SUS | MO16 | 42 | LA09225C-33        | 43.0 | 40.0 | 34.0 |
| 2016 | SUS | MO16 | 43 | NC10435-11         | 41.0 | 35.0 | 14.0 |
| 2016 | SUS | MO16 | 44 | NC12-22225         | 22.0 | 30.0 | 8.0  |
| 2016 | SUS | MO16 | 45 | NC13-20076         | 29.0 | 45.0 | 16.0 |
| 2016 | SUS | MO16 | 46 | NC13-22350         | 14.0 | 18.0 | 8.0  |
| 2016 | SUS | MO16 | 47 | NC13-23449         | 13.0 | 45.0 | 13.0 |
| 2016 | SUS | MO16 | 48 | VA12W-68           | 11.0 | 13.0 | 21.0 |
| 2016 | SUS | MO16 | 49 | VA13W-38           | 21.0 | 40.0 | 30.0 |
| 2016 | SUS | MO16 | 50 | VA09MAS6-122-7-1   | 19.0 | 23.0 | 27.0 |
| 2016 | SUS | MO16 | 51 | VA08MAS1-188-6-4-1 | 17.0 | 23.0 | 12.0 |
| 2016 | SUS | MO16 | 52 | VA13FHB-26         | 28.0 | 93.0 | 18.0 |
| 2016 | SUS | MO16 | 53 | VA14FHB-14         | 24.0 | 95.0 | 31.0 |
| 2016 | SUS | MO16 | 54 | VA14FHB-13         | 18.0 | 88.0 | 19.0 |
| 2016 | SUS | MO16 | 55 | VA14FHB-28         | 32.0 | 25.0 | 25.0 |
| 2015 | SUS | NC15 | 1  | ERNIE              | 7.0  | 4.2  | 4.4  |
| 2015 | SUS | NC15 | 2  | COKER9835          | 53.5 | 24.9 | 16.7 |
| 2015 | SUS | NC15 | 3  | BESS               | 17.5 | 3.2  | 5.5  |
| 2015 | SUS | NC15 | 4  | JAMESTOWN          | 7.0  | 4.1  | 2.1  |
| 2015 | SUS | NC15 | 5  | LA07085CW-P4       | 14.0 | 5.7  | 3.0  |
| 2015 | SUS | NC15 | 6  | LANC8170-41-2      | 17.5 | 4.0  | 2.2  |
| 2015 | SUS | NC15 | 7  | NC11-22289         | 7.0  | 2.9  | 1.2  |
| 2015 | SUS | NC15 | 8  | AR06024-7-2        | 7.0  | 3.2  | 2.2  |
| 2015 | SUS | NC15 | 9  | AR06037-17-2       | 33.0 | 11.6 | 7.0  |
| 2015 | SUS | NC15 | 10 | AR06045-2-4        | 14.0 | 2.6  | 3.2  |
| 2015 | SUS | NC15 | 11 | AR06045-16-4       | 21.0 | 7.1  | 3.9  |
| 2015 | SUS | NC15 | 12 | AR06046-10-3       | 30.5 | 6.4  | 9.3  |
| 2015 | SUS | NC15 | 13 | AR06061-11-1       | 14.0 | 4.0  | 2.4  |
| 2015 | SUS | NC15 | 14 | LW08190C-57-3      | 10.5 | 4.9  | 2.5  |
| 2015 | SUS | NC15 | 15 | ARGE08-1398        | 10.5 | 1.4  | 1.0  |
| 2015 | SUS | NC15 | 16 | B12-1792           | 14.0 | 4.3  | 5.0  |
| 2015 | SUS | NC15 | 17 | B12-2180NC         | 27.0 | 5.7  | 6.3  |
| 2015 | SUS | NC15 | 18 | GA071171-14ES8     | 29.0 | 5.0  | 5.3  |
| 2015 | SUS | NC15 | 19 | GA071092-14ES11    | 21.0 | 5.7  | 5.0  |
| 2015 | SUS | NC15 | 20 | GA071092-14ES13    | 28.5 | 6.4  | 6.5  |

|      |     |      |    |                 |      |      |      |
|------|-----|------|----|-----------------|------|------|------|
| 2015 | SUS | NC15 | 21 | GA081129-14ES16 | 14.0 | 3.6  | 2.5  |
| 2015 | SUS | NC15 | 22 | GA08250-14ES7   | 14.0 | 3.9  | 3.6  |
| 2015 | SUS | NC15 | 23 | GA08250-14ES5   | 31.0 | 8.3  | 5.2  |
| 2015 | SUS | NC15 | 24 | GA071171-14ES19 | 14.0 | 7.9  | 8.9  |
| 2015 | SUS | NC15 | 25 | GA081562-14ES14 | 17.5 | 7.3  | 8.9  |
| 2015 | SUS | NC15 | 26 | KWS054          | 7.0  | 4.4  | 5.4  |
| 2015 | SUS | NC15 | 27 | LA06146E-P4     | 7.0  | 6.3  | 7.1  |
| 2015 | SUS | NC15 | 28 | LA08265C-50     | 17.5 | 6.5  | 8.0  |
| 2015 | SUS | NC15 | 29 | LA09144C-6      | 17.5 | 8.2  | 18.8 |
| 2015 | SUS | NC15 | 30 | LANC8248-1      | 17.5 | 8.4  | 10.9 |
| 2015 | SUS | NC15 | 31 | ES13-1591       | 14.0 | 2.5  | 4.5  |
| 2015 | SUS | NC15 | 32 | ES13-3423       | 10.5 | 3.8  | 5.2  |
| 2015 | SUS | NC15 | 33 | ES12-3030       | 14.0 | 2.5  | 3.7  |
| 2015 | SUS | NC15 | 34 | M11-2024        | 14.0 | 6.5  | 8.5  |
| 2015 | SUS | NC15 | 35 | M12-3301        | 17.5 | 9.0  | 4.1  |
| 2015 | SUS | NC15 | 36 | M12-2036        | 27.5 | 4.3  | 6.9  |
| 2015 | SUS | NC15 | 37 | NC11-23084      | 27.0 | 8.3  | 10.0 |
| 2015 | SUS | NC15 | 38 | NC12-23576      | 33.0 | 10.3 | 11.9 |
| 2015 | SUS | NC15 | 39 | NC12-23219      | 14.0 | 4.7  | 2.2  |
| 2015 | SUS | NC15 | 40 | NC12-20662      | 10.5 | 4.4  | 2.3  |
| 2015 | SUS | NC15 | 41 | NC9305-7        | 27.0 | 4.4  | 5.6  |
| 2015 | SUS | NC15 | 42 | VA11W-106       | 21.0 | 11.1 | 17.0 |
| 2015 | SUS | NC15 | 43 | VA11W-313       | 7.0  | 4.7  | 5.0  |
| 2015 | SUS | NC15 | 44 | VA12W-72        | 16.0 | 3.6  | 4.1  |
| 2015 | SUS | NC15 | 45 | VA12W-54        | 27.0 | 5.0  | 4.8  |
| 2015 | SUS | NC15 | 46 | VA12FHB-53      | 33.0 | 4.5  | 4.7  |
| 2015 | SUS | NC15 | 47 | VA12FHB-4       | 27.0 | 3.2  | 4.0  |
| 2015 | SUS | NC15 | 48 | VA13W-177       | 7.0  | 1.2  | 1.2  |
| 2015 | SUS | NC15 | 49 | VA08MAS5-39-6-4 | 17.5 | 4.9  | 6.7  |
| 2015 | SUS | KY15 | 1  | ERNIE           | 32.3 | 18.8 | 11.7 |
| 2015 | SUS | KY15 | 2  | COKER9835       | 52.3 | 30.7 | 10.8 |
| 2015 | SUS | KY15 | 3  | BESS            | 42.3 | 16.7 | 5.5  |
| 2015 | SUS | KY15 | 4  | JAMESTOWN       | 45.5 | 26.2 | 5.8  |
| 2015 | SUS | KY15 | 5  | LA07085CW-P4    | 28.6 | 13.9 | 8.6  |
| 2015 | SUS | KY15 | 6  | LANC8170-41-2   | 45.6 | 17.2 | 5.8  |
| 2015 | SUS | KY15 | 7  | NC11-22289      | 16.4 | 4.6  | 2.6  |
| 2015 | SUS | KY15 | 8  | AR06024-7-2     | 29.9 | 5.2  | 2.9  |
| 2015 | SUS | KY15 | 9  | AR06037-17-2    | 46.4 | 20.4 | 9.5  |
| 2015 | SUS | KY15 | 10 | AR06045-2-4     | 25.1 | 12.2 | 6.7  |
| 2015 | SUS | KY15 | 11 | AR06045-16-4    | 30.1 | 12.0 | 7.1  |
| 2015 | SUS | KY15 | 12 | AR06046-10-3    | 32.7 | 15.8 | 5.4  |
| 2015 | SUS | KY15 | 13 | AR06061-11-1    | 44.1 | 14.7 | 4.0  |
| 2015 | SUS | KY15 | 14 | LW08190C-57-3   | 33.7 | 18.5 | 3.7  |
| 2015 | SUS | KY15 | 15 | ARGE08-1398     | 17.3 | 5.7  | 2.7  |
| 2015 | SUS | KY15 | 16 | B12-1792        | 53.8 | 16.0 | 15.9 |
| 2015 | SUS | KY15 | 17 | B12-2180NC      | 51.6 | 21.4 | 9.8  |
| 2015 | SUS | KY15 | 18 | GA071171-14ES8  | 46.8 | 13.7 | 7.5  |
| 2015 | SUS | KY15 | 19 | GA071092-14ES11 | 31.3 | 17.6 | 8.4  |
| 2015 | SUS | KY15 | 20 | GA071092-14ES13 | 33.8 | 16.1 | 8.8  |

|      |     |      |    |                 |      |      |      |
|------|-----|------|----|-----------------|------|------|------|
| 2015 | SUS | KY15 | 21 | GA081129-14ES16 | 16.7 | 12.5 | 9.3  |
| 2015 | SUS | KY15 | 22 | GA08250-14ES7   | 35.3 | 14.2 | 8.7  |
| 2015 | SUS | KY15 | 23 | GA08250-14ES5   | 43.0 | 20.0 | 13.3 |
| 2015 | SUS | KY15 | 24 | GA071171-14ES19 | 27.6 | 12.2 | 9.6  |
| 2015 | SUS | KY15 | 25 | GA081562-14ES14 | 44.8 | 25.9 | 16.5 |
| 2015 | SUS | KY15 | 26 | KWS054          | 22.1 | 17.0 | 8.7  |
| 2015 | SUS | KY15 | 27 | LA06146E-P4     | 43.4 | 20.3 | 14.6 |
| 2015 | SUS | KY15 | 28 | LA08265C-50     | 42.6 | 17.2 | 7.5  |
| 2015 | SUS | KY15 | 29 | LA09144C-6      | 40.5 | 33.6 | 20.1 |
| 2015 | SUS | KY15 | 30 | LANC8248-1      | 68.6 | 28.4 | 11.3 |
| 2015 | SUS | KY15 | 31 | ES13-1591       | 28.3 | 15.1 | 3.2  |
| 2015 | SUS | KY15 | 32 | ES13-3423       | 38.1 | 12.6 | 4.5  |
| 2015 | SUS | KY15 | 33 | ES12-3030       | 35.8 | 12.5 | 6.0  |
| 2015 | SUS | KY15 | 34 | M11-2024        | 53.4 | 13.7 | 6.7  |
| 2015 | SUS | KY15 | 35 | M12-3301        | 36.0 | 15.9 | 5.8  |
| 2015 | SUS | KY15 | 36 | M12-2036        | 36.5 | 13.7 | 7.6  |
| 2015 | SUS | KY15 | 37 | NC11-23084      | 43.9 | 19.2 | 7.2  |
| 2015 | SUS | KY15 | 38 | NC12-23576      | 39.3 | 23.1 | 13.7 |
| 2015 | SUS | KY15 | 39 | NC12-23219      | 29.8 | 14.8 | 4.9  |
| 2015 | SUS | KY15 | 40 | NC12-20662      | 18.6 | 7.8  | 6.3  |
| 2015 | SUS | KY15 | 41 | NC9305-7        | 27.5 | 13.6 | 4.2  |
| 2015 | SUS | KY15 | 42 | VA11W-106       | 44.9 | 18.6 | 9.1  |
| 2015 | SUS | KY15 | 43 | VA11W-313       | 33.7 | 17.6 | 7.6  |
| 2015 | SUS | KY15 | 44 | VA12W-72        | 39.5 | 15.0 | 9.0  |
| 2015 | SUS | KY15 | 45 | VA12W-54        | 57.4 | 20.9 | 16.1 |
| 2015 | SUS | KY15 | 46 | VA12FHB-53      | 49.2 | 18.1 | 4.2  |
| 2015 | SUS | KY15 | 47 | VA12FHB-4       | 30.6 | 11.2 | 5.5  |
| 2015 | SUS | KY15 | 48 | VA13W-177       | 16.9 | 6.5  | 4.1  |
| 2015 | SUS | KY15 | 49 | VA08MAS5-39-6-4 | 33.2 | 18.2 | 7.4  |
| 2015 | SUS | MO15 | 1  | ERNIE           | 17.0 | 35.0 | 6.2  |
| 2015 | SUS | MO15 | 2  | COKER9835       | 51.5 | 80.0 | 7.1  |
| 2015 | SUS | MO15 | 3  | BESS            | 3.1  | 17.5 | 4.3  |
| 2015 | SUS | MO15 | 4  | JAMESTOWN       | 18.1 | 40.0 | 5.6  |
| 2015 | SUS | MO15 | 5  | LA07085CW-P4    | 7.7  | 62.5 | 6.6  |
| 2015 | SUS | MO15 | 6  | LANC8170-41-2   | 30.7 | 87.5 | 4.3  |
| 2015 | SUS | MO15 | 7  | NC11-22289      | 13.3 | 20.0 | 2.3  |
| 2015 | SUS | MO15 | 8  | AR06024-7-2     | 14.4 | 17.5 | 2.9  |
| 2015 | SUS | MO15 | 9  | AR06037-17-2    | 35.9 | 85.0 | 10.9 |
| 2015 | SUS | MO15 | 10 | AR06045-2-4     | 4.9  | 37.5 | 3.3  |
| 2015 | SUS | MO15 | 11 | AR06045-16-4    | 11.0 | 35.0 | 4.3  |
| 2015 | SUS | MO15 | 12 | AR06046-10-3    | 29.5 | 72.5 | 9.3  |
| 2015 | SUS | MO15 | 13 | AR06061-11-1    | 23.7 | 42.5 | 8.9  |
| 2015 | SUS | MO15 | 14 | LW08190C-57-3   | 13.5 | 62.5 | 5.0  |
| 2015 | SUS | MO15 | 15 | ARGE08-1398     | 5.9  | 45.0 | 0.8  |
| 2015 | SUS | MO15 | 16 | B12-1792        | 33.1 | 55.0 | 7.8  |
| 2015 | SUS | MO15 | 17 | B12-2180NC      | 10.1 | 37.5 | 6.3  |
| 2015 | SUS | MO15 | 18 | GA071171-14ES8  | 33.3 | 50.0 | 5.3  |
| 2015 | SUS | MO15 | 19 | GA071092-14ES11 | 14.6 | 67.5 | 4.9  |
| 2015 | SUS | MO15 | 20 | GA071092-14ES13 | 26.9 | 55.0 | 4.1  |



|      |     |      |    |                 |      |      |      |
|------|-----|------|----|-----------------|------|------|------|
| 2015 | SUS | MO15 | 21 | GA081129-14ES16 | 22.7 | 65.0 | 5.5  |
| 2015 | SUS | MO15 | 22 | GA08250-14ES7   | 33.2 | 62.5 | 8.3  |
| 2015 | SUS | MO15 | 23 | GA08250-14ES5   | 8.9  | 40.0 | 5.0  |
| 2015 | SUS | MO15 | 24 | GA071171-14ES19 | 26.5 | 55.0 | 8.4  |
| 2015 | SUS | MO15 | 25 | GA081562-14ES14 | 38.2 | 60.0 | 10.6 |
| 2015 | SUS | MO15 | 26 | KWS054          | 25.5 | 57.5 | 8.6  |
| 2015 | SUS | MO15 | 27 | LA06146E-P4     | 9.3  | 80.0 | 7.2  |
| 2015 | SUS | MO15 | 28 | LA08265C-50     | 13.2 | 60.0 | 5.3  |
| 2015 | SUS | MO15 | 29 | LA09144C-6      | 63.4 | 90.0 | 7.6  |
| 2015 | SUS | MO15 | 30 | LANC8248-1      | 13.1 | 50.0 | 6.7  |
| 2015 | SUS | MO15 | 31 | ES13-1591       | 16.5 | 57.5 | 5.4  |
| 2015 | SUS | MO15 | 32 | ES13-3423       | 14.3 | 77.5 | 9.8  |
| 2015 | SUS | MO15 | 33 | ES12-3030       | 14.3 | 57.5 | 7.6  |
| 2015 | SUS | MO15 | 34 | M11-2024        | 23.3 | 25.0 | 7.4  |
| 2015 | SUS | MO15 | 35 | M12-3301        | 23.3 | 50.0 | 3.6  |
| 2015 | SUS | MO15 | 36 | M12-2036        | 7.9  | 87.5 | 17.2 |
| 2015 | SUS | MO15 | 37 | NC11-23084      | 9.8  | 32.5 | 2.9  |
| 2015 | SUS | MO15 | 38 | NC12-23576      | 20.4 | 85.0 | 7.2  |
| 2015 | SUS | MO15 | 39 | NC12-23219      | 24.2 | 60.0 | 11.6 |
| 2015 | SUS | MO15 | 40 | NC12-20662      | 8.0  | 32.5 | 4.8  |
| 2015 | SUS | MO15 | 41 | NC9305-7        | 27.4 | 17.5 | 6.5  |
| 2015 | SUS | MO15 | 42 | VA11W-106       | 10.1 | 72.5 | 6.6  |
| 2015 | SUS | MO15 | 43 | VA11W-313       | 24.3 | 90.0 | 12.1 |
| 2015 | SUS | MO15 | 44 | VA12W-72        | 16.4 | 75.0 | 13.2 |
| 2015 | SUS | MO15 | 45 | VA12W-54        | 26.1 | 87.5 | 16.0 |
| 2015 | SUS | MO15 | 46 | VA12FHB-53      | 18.5 | 67.5 | 3.7  |
| 2015 | SUS | MO15 | 47 | VA12FHB-4       | 13.4 | 37.5 | 5.3  |
| 2015 | SUS | MO15 | 48 | VA13W-177       | 11.3 | 35.0 | 6.0  |
| 2015 | SUS | MO15 | 49 | VA08MAS5-39-6-4 | 21.7 | 60.0 | 6.9  |
| 2015 | SUS | VA15 | 1  | ERNIE           | 7.0  | NA   | 0.1  |
| 2015 | SUS | VA15 | 2  | COKER9835       | 30.5 | NA   | 1.0  |
| 2015 | SUS | VA15 | 3  | BESS            | 13.0 | NA   | 0.2  |
| 2015 | SUS | VA15 | 4  | JAMESTOWN       | 7.0  | NA   | 0.1  |
| 2015 | SUS | VA15 | 5  | LA07085CW-P4    | 24.3 | NA   | 0.5  |
| 2015 | SUS | VA15 | 6  | LANC8170-41-2   | 19.8 | NA   | 0.4  |
| 2015 | SUS | VA15 | 7  | NC11-22289      | 9.3  | NA   | 0.2  |
| 2015 | SUS | VA15 | 8  | AR06024-7-2     | 13.6 | NA   | 0.1  |
| 2015 | SUS | VA15 | 9  | AR06037-17-2    | 19.1 | NA   | 0.8  |
| 2015 | SUS | VA15 | 10 | AR06045-2-4     | 29.6 | NA   | 0.1  |
| 2015 | SUS | VA15 | 11 | AR06045-16-4    | 21.6 | NA   | 0.1  |
| 2015 | SUS | VA15 | 12 | AR06046-10-3    | 15.2 | NA   | 0.1  |
| 2015 | SUS | VA15 | 13 | AR06061-11-1    | 8.6  | NA   | 0.2  |
| 2015 | SUS | VA15 | 14 | LW08190C-57-3   | 15.1 | NA   | 0.1  |
| 2015 | SUS | VA15 | 15 | ARGE08-1398     | 9.8  | NA   | NA   |
| 2015 | SUS | VA15 | 16 | B12-1792        | 12.6 | NA   | 0.6  |
| 2015 | SUS | VA15 | 17 | B12-2180NC      | 19.9 | NA   | 0.9  |
| 2015 | SUS | VA15 | 18 | GA071171-14ES8  | 18.1 | NA   | 0.7  |
| 2015 | SUS | VA15 | 19 | GA071092-14ES11 | 17.7 | NA   | 0.3  |
| 2015 | SUS | VA15 | 20 | GA071092-14ES13 | 11.3 | NA   | 0.3  |

|      |     |      |    |                 |      |      |     |
|------|-----|------|----|-----------------|------|------|-----|
| 2015 | SUS | VA15 | 21 | GA081129-14ES16 | NA   | NA   | NA  |
| 2015 | SUS | VA15 | 22 | GA08250-14ES7   | 12.1 | NA   | 0.4 |
| 2015 | SUS | VA15 | 23 | GA08250-14ES5   | 11.8 | NA   | 0.4 |
| 2015 | SUS | VA15 | 24 | GA071171-14ES19 | 23.6 | NA   | 0.4 |
| 2015 | SUS | VA15 | 25 | GA081562-14ES14 | 21.1 | NA   | 0.8 |
| 2015 | SUS | VA15 | 26 | KWS054          | 10.3 | NA   | 0.6 |
| 2015 | SUS | VA15 | 27 | LA06146E-P4     | 22.7 | NA   | 1.0 |
| 2015 | SUS | VA15 | 28 | LA08265C-50     | 21.7 | NA   | 1.0 |
| 2015 | SUS | VA15 | 29 | LA09144C-6      | 31.5 | NA   | 1.3 |
| 2015 | SUS | VA15 | 30 | LANC8248-1      | 25.1 | NA   | 0.4 |
| 2015 | SUS | VA15 | 31 | ES13-1591       | 10.5 | NA   | 0.1 |
| 2015 | SUS | VA15 | 32 | ES13-3423       | 11.1 | NA   | 0.2 |
| 2015 | SUS | VA15 | 33 | ES12-3030       | 13.3 | NA   | 0.1 |
| 2015 | SUS | VA15 | 34 | M11-2024        | 14.9 | NA   | 0.5 |
| 2015 | SUS | VA15 | 35 | M12-3301        | 13.0 | NA   | 0.2 |
| 2015 | SUS | VA15 | 36 | M12-2036        | 15.8 | NA   | 0.4 |
| 2015 | SUS | VA15 | 37 | NC11-23084      | 37.7 | NA   | 0.1 |
| 2015 | SUS | VA15 | 38 | NC12-23576      | 35.0 | NA   | 0.6 |
| 2015 | SUS | VA15 | 39 | NC12-23219      | 8.2  | NA   | 0.1 |
| 2015 | SUS | VA15 | 40 | NC12-20662      | 26.6 | NA   | 0.1 |
| 2015 | SUS | VA15 | 41 | NC9305-7        | 16.0 | NA   | 0.2 |
| 2015 | SUS | VA15 | 42 | VA11W-106       | 14.3 | NA   | 0.5 |
| 2015 | SUS | VA15 | 43 | VA11W-313       | 16.4 | NA   | 0.6 |
| 2015 | SUS | VA15 | 44 | VA12W-72        | 16.9 | NA   | 0.6 |
| 2015 | SUS | VA15 | 45 | VA12W-54        | 25.3 | NA   | 0.4 |
| 2015 | SUS | VA15 | 46 | VA12FHB-53      | 10.9 | NA   | 0.2 |
| 2015 | SUS | VA15 | 47 | VA12FHB-4       | 31.3 | NA   | 0.1 |
| 2015 | SUS | VA15 | 48 | VA13W-177       | 9.3  | NA   | 0.1 |
| 2015 | SUS | VA15 | 49 | VA08MAS5-39-6-4 | 37.3 | NA   | 0.2 |
| 2015 | SUS | IL15 | 1  | ERNIE           | 69.3 | 30.0 | NA  |
| 2015 | SUS | IL15 | 2  | COKER9835       | 74.8 | 55.0 | NA  |
| 2015 | SUS | IL15 | 3  | BESS            | 47.5 | 15.0 | NA  |
| 2015 | SUS | IL15 | 4  | JAMESTOWN       | 46.2 | 23.3 | NA  |
| 2015 | SUS | IL15 | 5  | LA07085CW-P4    | 55.0 | 50.0 | NA  |
| 2015 | SUS | IL15 | 6  | LANC8170-41-2   | 65.9 | 40.0 | NA  |
| 2015 | SUS | IL15 | 7  | NC11-22289      | 21.6 | 25.0 | NA  |
| 2015 | SUS | IL15 | 8  | AR06024-7-2     | 22.2 | 28.3 | NA  |
| 2015 | SUS | IL15 | 9  | AR06037-17-2    | 43.2 | 31.7 | NA  |
| 2015 | SUS | IL15 | 10 | AR06045-2-4     | 25.0 | 13.3 | NA  |
| 2015 | SUS | IL15 | 11 | AR06045-16-4    | 32.6 | 26.7 | NA  |
| 2015 | SUS | IL15 | 12 | AR06046-10-3    | 66.6 | 23.3 | NA  |
| 2015 | SUS | IL15 | 13 | AR06061-11-1    | 34.0 | 10.0 | NA  |
| 2015 | SUS | IL15 | 14 | LW08190C-57-3   | 27.1 | 51.7 | NA  |
| 2015 | SUS | IL15 | 15 | ARGE08-1398     | 13.9 | 24.6 | NA  |
| 2015 | SUS | IL15 | 16 | B12-1792        | 76.8 | 20.0 | NA  |
| 2015 | SUS | IL15 | 17 | B12-2180NC      | 53.3 | 26.7 | NA  |
| 2015 | SUS | IL15 | 18 | GA071171-14ES8  | 66.7 | 33.3 | NA  |
| 2015 | SUS | IL15 | 19 | GA071092-14ES11 | 30.4 | 38.3 | NA  |
| 2015 | SUS | IL15 | 20 | GA071092-14ES13 | 26.1 | 41.7 | NA  |

|      |     |       |    |                 |      |      |    |
|------|-----|-------|----|-----------------|------|------|----|
| 2015 | SUS | IL15  | 21 | GA081129-14ES16 | 60.1 | 51.7 | NA |
| 2015 | SUS | IL15  | 22 | GA08250-14ES7   | 42.3 | 23.3 | NA |
| 2015 | SUS | IL15  | 23 | GA08250-14ES5   | 43.9 | 50.0 | NA |
| 2015 | SUS | IL15  | 24 | GA071171-14ES19 | 44.6 | 28.3 | NA |
| 2015 | SUS | IL15  | 25 | GA081562-14ES14 | 14.0 | 73.3 | NA |
| 2015 | SUS | IL15  | 26 | KWS054          | 47.3 | 53.3 | NA |
| 2015 | SUS | IL15  | 27 | LA06146E-P4     | 38.6 | 53.3 | NA |
| 2015 | SUS | IL15  | 28 | LA08265C-50     | 89.0 | 46.7 | NA |
| 2015 | SUS | IL15  | 29 | LA09144C-6      | 67.7 | 33.3 | NA |
| 2015 | SUS | IL15  | 30 | LANC8248-1      | 75.6 | 19.6 | NA |
| 2015 | SUS | IL15  | 31 | ES13-1591       | 30.7 | 21.7 | NA |
| 2015 | SUS | IL15  | 32 | ES13-3423       | 33.4 | 41.7 | NA |
| 2015 | SUS | IL15  | 33 | ES12-3030       | 77.5 | 26.7 | NA |
| 2015 | SUS | IL15  | 34 | M11-2024        | 72.6 | 20.0 | NA |
| 2015 | SUS | IL15  | 35 | M12-3301        | 36.9 | 15.0 | NA |
| 2015 | SUS | IL15  | 36 | M12-2036        | 37.5 | 15.0 | NA |
| 2015 | SUS | IL15  | 37 | NC11-23084      | 46.3 | 33.3 | NA |
| 2015 | SUS | IL15  | 38 | NC12-23576      | 64.0 | 38.3 | NA |
| 2015 | SUS | IL15  | 39 | NC12-23219      | 62.8 | 28.3 | NA |
| 2015 | SUS | IL15  | 40 | NC12-20662      | 17.7 | 33.3 | NA |
| 2015 | SUS | IL15  | 41 | NC9305-7        | 58.7 | 17.1 | NA |
| 2015 | SUS | IL15  | 42 | VA11W-106       | 64.5 | 40.0 | NA |
| 2015 | SUS | IL15  | 43 | VA11W-313       | 78.9 | 56.7 | NA |
| 2015 | SUS | IL15  | 44 | VA12W-72        | 46.4 | 70.0 | NA |
| 2015 | SUS | IL15  | 45 | VA12W-54        | 53.7 | 43.3 | NA |
| 2015 | SUS | IL15  | 46 | VA12FHB-53      | 32.6 | 47.1 | NA |
| 2015 | SUS | IL15  | 47 | VA12FHB-4       | 20.2 | 13.3 | NA |
| 2015 | SUS | IL15  | 48 | VA13W-177       | 33.4 | 20.0 | NA |
| 2015 | SUS | IL15  | 49 | VA08MAS5-39-6-4 | 44.1 | 33.3 | NA |
| 2015 | SUS | HIL15 | 1  | ERNIE           | 30.0 | 25.0 | NA |
| 2015 | SUS | HIL15 | 2  | COKER9835       | 65.0 | 60.0 | NA |
| 2015 | SUS | HIL15 | 3  | BESS            | 25.0 | 60.0 | NA |
| 2015 | SUS | HIL15 | 4  | JAMESTOWN       | 40.0 | 10.0 | NA |
| 2015 | SUS | HIL15 | 5  | LA07085CW-P4    | 55.0 | 60.0 | NA |
| 2015 | SUS | HIL15 | 6  | LANC8170-41-2   | 45.0 | 20.0 | NA |
| 2015 | SUS | HIL15 | 7  | NC11-22289      | 35.0 | 50.0 | NA |
| 2015 | SUS | HIL15 | 8  | AR06024-7-2     | 45.0 | 12.5 | NA |
| 2015 | SUS | HIL15 | 9  | AR06037-17-2    | 25.0 | 20.0 | NA |
| 2015 | SUS | HIL15 | 10 | AR06045-2-4     | 10.0 | 22.5 | NA |
| 2015 | SUS | HIL15 | 11 | AR06045-16-4    | 20.0 | 6.5  | NA |
| 2015 | SUS | HIL15 | 12 | AR06046-10-3    | 15.0 | 20.0 | NA |
| 2015 | SUS | HIL15 | 13 | AR06061-11-1    | 10.0 | 22.5 | NA |
| 2015 | SUS | HIL15 | 14 | LW08190C-57-3   | 40.0 | 10.0 | NA |
| 2015 | SUS | HIL15 | 15 | ARGE08-1398     | 15.0 | 4.0  | NA |
| 2015 | SUS | HIL15 | 16 | B12-1792        | 70.0 | 22.5 | NA |
| 2015 | SUS | HIL15 | 17 | B12-2180NC      | 35.0 | 12.5 | NA |
| 2015 | SUS | HIL15 | 18 | GA071171-14ES8  | 65.0 | 22.5 | NA |
| 2015 | SUS | HIL15 | 19 | GA071092-14ES11 | 35.0 | 30.0 | NA |
| 2015 | SUS | HIL15 | 20 | GA071092-14ES13 | 40.0 | 30.0 | NA |

|      |     |       |    |                 |      |      |     |
|------|-----|-------|----|-----------------|------|------|-----|
| 2015 | SUS | HIL15 | 21 | GA081129-14ES16 | 55.0 | 55.0 | NA  |
| 2015 | SUS | HIL15 | 22 | GA08250-14ES7   | 20.0 | 47.5 | NA  |
| 2015 | SUS | HIL15 | 23 | GA08250-14ES5   | 40.0 | 15.0 | NA  |
| 2015 | SUS | HIL15 | 24 | GA071171-14ES19 | 35.0 | 50.0 | NA  |
| 2015 | SUS | HIL15 | 25 | GA081562-14ES14 | 55.0 | 42.5 | NA  |
| 2015 | SUS | HIL15 | 26 | KWS054          | 55.0 | 65.0 | NA  |
| 2015 | SUS | HIL15 | 27 | LA06146E-P4     | 55.0 | 75.0 | NA  |
| 2015 | SUS | HIL15 | 28 | LA08265C-50     | 55.0 | 45.0 | NA  |
| 2015 | SUS | HIL15 | 29 | LA09144C-6      | 45.0 | 57.5 | NA  |
| 2015 | SUS | HIL15 | 30 | LANC8248-1      | 65.0 | 22.5 | NA  |
| 2015 | SUS | HIL15 | 31 | ES13-1591       | 40.0 | 47.5 | NA  |
| 2015 | SUS | HIL15 | 32 | ES13-3423       | 35.0 | 40.0 | NA  |
| 2015 | SUS | HIL15 | 33 | ES12-3030       | 40.0 | 45.0 | NA  |
| 2015 | SUS | HIL15 | 34 | M11-2024        | 45.0 | 22.5 | NA  |
| 2015 | SUS | HIL15 | 35 | M12-3301        | 20.0 | 22.5 | NA  |
| 2015 | SUS | HIL15 | 36 | M12-2036        | 50.0 | 70.0 | NA  |
| 2015 | SUS | HIL15 | 37 | NC11-23084      | 15.0 | 7.5  | NA  |
| 2015 | SUS | HIL15 | 38 | NC12-23576      | 30.0 | 22.5 | NA  |
| 2015 | SUS | HIL15 | 39 | NC12-23219      | 55.0 | 15.0 | NA  |
| 2015 | SUS | HIL15 | 40 | NC12-20662      | 40.0 | 30.0 | NA  |
| 2015 | SUS | HIL15 | 41 | NC9305-7        | 20.0 | 11.5 | NA  |
| 2015 | SUS | HIL15 | 42 | VA11W-106       | 25.0 | 35.0 | NA  |
| 2015 | SUS | HIL15 | 43 | VA11W-313       | 75.0 | 31.5 | NA  |
| 2015 | SUS | HIL15 | 44 | VA12W-72        | 60.0 | 75.0 | NA  |
| 2015 | SUS | HIL15 | 45 | VA12W-54        | 70.0 | 57.5 | NA  |
| 2015 | SUS | HIL15 | 46 | VA12FHB-53      | 35.0 | 22.5 | NA  |
| 2015 | SUS | HIL15 | 47 | VA12FHB-4       | 35.0 | 3.0  | NA  |
| 2015 | SUS | HIL15 | 48 | VA13W-177       | 30.0 | 35.0 | NA  |
| 2015 | SUS | HIL15 | 49 | VA08MAS5-39-6-4 | 75.0 | 57.5 | NA  |
| 2015 | SUS | GA15  | 1  | ERNIE           | 25.0 | NA   | 2.8 |
| 2015 | SUS | GA15  | 2  | COKER9835       | 80.0 | NA   | 7.0 |
| 2015 | SUS | GA15  | 3  | BESS            | 26.0 | NA   | 1.7 |
| 2015 | SUS | GA15  | 4  | JAMESTOWN       | 22.0 | NA   | 0.6 |
| 2015 | SUS | GA15  | 5  | LA07085CW-P4    | 33.0 | NA   | 6.5 |
| 2015 | SUS | GA15  | 6  | LANC8170-41-2   | 28.0 | NA   | 1.0 |
| 2015 | SUS | GA15  | 7  | NC11-22289      | 18.0 | NA   | 0.6 |
| 2015 | SUS | GA15  | 8  | AR06024-7-2     | 13.0 | NA   | 0.5 |
| 2015 | SUS | GA15  | 9  | AR06037-17-2    | 40.0 | NA   | 3.8 |
| 2015 | SUS | GA15  | 10 | AR06045-2-4     | 22.0 | NA   | 2.1 |
| 2015 | SUS | GA15  | 11 | AR06045-16-4    | 30.0 | NA   | 3.0 |
| 2015 | SUS | GA15  | 12 | AR06046-10-3    | 35.0 | NA   | 5.2 |
| 2015 | SUS | GA15  | 13 | AR06061-11-1    | 25.0 | NA   | 4.6 |
| 2015 | SUS | GA15  | 14 | LW08190C-57-3   | 30.0 | NA   | 4.5 |
| 2015 | SUS | GA15  | 15 | ARGE08-1398     | 22.0 | NA   | 0.1 |
| 2015 | SUS | GA15  | 16 | B12-1792        | 35.0 | NA   | 2.7 |
| 2015 | SUS | GA15  | 17 | B12-2180NC      | 33.0 | NA   | 3.5 |
| 2015 | SUS | GA15  | 18 | GA071171-14ES8  | 35.0 | NA   | 3.6 |
| 2015 | SUS | GA15  | 19 | GA071092-14ES11 | 40.0 | NA   | 7.7 |
| 2015 | SUS | GA15  | 20 | GA071092-14ES13 | 45.0 | NA   | 4.1 |

|      |     |       |    |                 |       |      |      |
|------|-----|-------|----|-----------------|-------|------|------|
| 2015 | SUS | GA15  | 21 | GA081129-14ES16 | 35.0  | NA   | 2.3  |
| 2015 | SUS | GA15  | 22 | GA08250-14ES7   | 33.0  | NA   | 5.7  |
| 2015 | SUS | GA15  | 23 | GA08250-14ES5   | 40.0  | NA   | 4.2  |
| 2015 | SUS | GA15  | 24 | GA071171-14ES19 | 40.0  | NA   | 6.7  |
| 2015 | SUS | GA15  | 25 | GA081562-14ES14 | 28.0  | NA   | 9.4  |
| 2015 | SUS | GA15  | 26 | KWS054          | 30.0  | NA   | 3.7  |
| 2015 | SUS | GA15  | 27 | LA06146E-P4     | 28.0  | NA   | 2.2  |
| 2015 | SUS | GA15  | 28 | LA08265C-50     | 35.0  | NA   | 2.2  |
| 2015 | SUS | GA15  | 29 | LA09144C-6      | 40.0  | NA   | 5.0  |
| 2015 | SUS | GA15  | 30 | LANC8248-1      | 33.0  | NA   | 5.8  |
| 2015 | SUS | GA15  | 31 | ES13-1591       | 35.0  | NA   | 2.7  |
| 2015 | SUS | GA15  | 32 | ES13-3423       | 50.0  | NA   | 3.4  |
| 2015 | SUS | GA15  | 33 | ES12-3030       | 40.0  | NA   | 3.1  |
| 2015 | SUS | GA15  | 34 | M11-2024        | 45.0  | NA   | 2.5  |
| 2015 | SUS | GA15  | 35 | M12-3301        | 40.0  | NA   | 3.3  |
| 2015 | SUS | GA15  | 36 | M12-2036        | 35.0  | NA   | 2.9  |
| 2015 | SUS | GA15  | 37 | NC11-23084      | 55.0  | NA   | 9.8  |
| 2015 | SUS | GA15  | 38 | NC12-23576      | 45.0  | NA   | 3.0  |
| 2015 | SUS | GA15  | 39 | NC12-23219      | 25.0  | NA   | 0.9  |
| 2015 | SUS | GA15  | 40 | NC12-20662      | 40.0  | NA   | 2.4  |
| 2015 | SUS | GA15  | 41 | NC9305-7        | 30.0  | NA   | 3.6  |
| 2015 | SUS | GA15  | 42 | VA11W-106       | 40.0  | NA   | 10.2 |
| 2015 | SUS | GA15  | 43 | VA11W-313       | 25.0  | NA   | 2.5  |
| 2015 | SUS | GA15  | 44 | VA12W-72        | 22.0  | NA   | 8.3  |
| 2015 | SUS | GA15  | 45 | VA12W-54        | 33.0  | NA   | 5.4  |
| 2015 | SUS | GA15  | 46 | VA12FHB-53      | 35.0  | NA   | 1.8  |
| 2015 | SUS | GA15  | 47 | VA12FHB-4       | 45.0  | NA   | 3.4  |
| 2015 | SUS | GA15  | 48 | VA13W-177       | 22.0  | NA   | 1.0  |
| 2015 | SUS | GA15  | 49 | VA08MAS5-39-6-4 | 40.0  | NA   | 3.4  |
| 2015 | SUS | FAR15 | 1  | ERNIE           | 95.0  | 90.0 | 17.0 |
| 2015 | SUS | FAR15 | 2  | COKER9835       | 100.0 | 95.0 | 13.6 |
| 2015 | SUS | FAR15 | 3  | BESS            | 35.0  | 46.7 | 9.7  |
| 2015 | SUS | FAR15 | 4  | JAMESTOWN       | 33.3  | 45.0 | 11.1 |
| 2015 | SUS | FAR15 | 5  | LA07085CW-P4    | 41.7  | 71.7 | 17.1 |
| 2015 | SUS | FAR15 | 6  | LANC8170-41-2   | 38.3  | 53.3 | 7.3  |
| 2015 | SUS | FAR15 | 7  | NC11-22289      | 33.3  | 56.7 | 11.5 |
| 2015 | SUS | FAR15 | 8  | AR06024-7-2     | 25.0  | 45.0 | 8.3  |
| 2015 | SUS | FAR15 | 9  | AR06037-17-2    | 50.0  | 73.3 | 12.9 |
| 2015 | SUS | FAR15 | 10 | AR06045-2-4     | 41.7  | 75.0 | 14.0 |
| 2015 | SUS | FAR15 | 11 | AR06045-16-4    | 41.7  | 61.7 | 12.6 |
| 2015 | SUS | FAR15 | 12 | AR06046-10-3    | 43.3  | 75.0 | 14.4 |
| 2015 | SUS | FAR15 | 13 | AR06061-11-1    | 38.3  | 48.3 | 10.6 |
| 2015 | SUS | FAR15 | 14 | LW08190C-57-3   | 35.0  | 76.7 | 7.7  |
| 2015 | SUS | FAR15 | 15 | ARGE08-1398     | 13.3  | 26.7 | 2.1  |
| 2015 | SUS | FAR15 | 16 | B12-1792        | 53.3  | 81.7 | 22.1 |
| 2015 | SUS | FAR15 | 17 | B12-2180NC      | 45.0  | 48.3 | 8.8  |
| 2015 | SUS | FAR15 | 18 | GA071171-14ES8  | 41.7  | 55.0 | 12.2 |
| 2015 | SUS | FAR15 | 19 | GA071092-14ES11 | 51.7  | 63.3 | 12.5 |
| 2015 | SUS | FAR15 | 20 | GA071092-14ES13 | 53.3  | 66.7 | 12.3 |

|      |     |       |    |                 |       |      |      |
|------|-----|-------|----|-----------------|-------|------|------|
| 2015 | SUS | FAR15 | 21 | GA081129-14ES16 | 36.7  | 48.3 | 13.6 |
| 2015 | SUS | FAR15 | 22 | GA08250-14ES7   | 35.0  | 51.7 | 15.5 |
| 2015 | SUS | FAR15 | 23 | GA08250-14ES5   | 46.7  | 68.3 | 11.2 |
| 2015 | SUS | FAR15 | 24 | GA071171-14ES19 | 40.0  | 48.3 | 11.9 |
| 2015 | SUS | FAR15 | 25 | GA081562-14ES14 | 38.3  | 65.0 | 18.5 |
| 2015 | SUS | FAR15 | 26 | KWS054          | 40.0  | 76.7 | 14.2 |
| 2015 | SUS | FAR15 | 27 | LA06146E-P4     | 31.7  | 56.7 | 15.9 |
| 2015 | SUS | FAR15 | 28 | LA08265C-50     | 28.3  | 48.3 | 7.1  |
| 2015 | SUS | FAR15 | 29 | LA09144C-6      | 78.3  | 75.0 | 21.7 |
| 2015 | SUS | FAR15 | 30 | LANC8248-1      | 45.0  | 46.7 | 12.2 |
| 2015 | SUS | FAR15 | 31 | ES13-1591       | 43.3  | 81.7 | 10.1 |
| 2015 | SUS | FAR15 | 32 | ES13-3423       | 100.0 | 95.0 | 13.4 |
| 2015 | SUS | FAR15 | 33 | ES12-3030       | 55.0  | 68.3 | 12.6 |
| 2015 | SUS | FAR15 | 34 | M11-2024        | 26.7  | 53.3 | 14.3 |
| 2015 | SUS | FAR15 | 35 | M12-3301        | 90.0  | 88.3 | 10.7 |
| 2015 | SUS | FAR15 | 36 | M12-2036        | 25.0  | 56.7 | 17.6 |
| 2015 | SUS | FAR15 | 37 | NC11-23084      | 91.7  | 93.3 | 14.1 |
| 2015 | SUS | FAR15 | 38 | NC12-23576      | 50.0  | 83.3 | 22.6 |
| 2015 | SUS | FAR15 | 39 | NC12-23219      | 26.7  | 58.3 | 13.8 |
| 2015 | SUS | FAR15 | 40 | NC12-20662      | 96.7  | 81.7 | 12.7 |
| 2015 | SUS | FAR15 | 41 | NC9305-7        | 35.0  | 53.3 | 11.7 |
| 2015 | SUS | FAR15 | 42 | VA11W-106       | 55.0  | 83.3 | 17.1 |
| 2015 | SUS | FAR15 | 43 | VA11W-313       | 56.7  | 91.7 | 15.9 |
| 2015 | SUS | FAR15 | 44 | VA12W-72        | 40.0  | 91.7 | 26.3 |
| 2015 | SUS | FAR15 | 45 | VA12W-54        | 55.0  | 80.0 | 12.7 |
| 2015 | SUS | FAR15 | 46 | VA12FHB-53      | 43.3  | 90.0 | 16.4 |
| 2015 | SUS | FAR15 | 47 | VA12FHB-4       | 90.0  | 88.3 | 12.3 |
| 2015 | SUS | FAR15 | 48 | VA13W-177       | 18.3  | 38.3 | 9.6  |
| 2015 | SUS | FAR15 | 49 | VA08MAS5-39-6-4 | 88.3  | 88.3 | 9.1  |
| 2015 | SUS | NAR15 | 1  | ERNIE           | 63.3  | 38.3 | 13.0 |
| 2015 | SUS | NAR15 | 2  | COKER9835       | 90.0  | 75.0 | 21.9 |
| 2015 | SUS | NAR15 | 3  | BESS            | 23.3  | 20.0 | 9.4  |
| 2015 | SUS | NAR15 | 4  | JAMESTOWN       | 60.0  | 31.7 | 12.2 |
| 2015 | SUS | NAR15 | 5  | LA07085CW-P4    | 75.0  | 55.0 | 16.1 |
| 2015 | SUS | NAR15 | 6  | LANC8170-41-2   | 66.7  | 46.7 | 10.9 |
| 2015 | SUS | NAR15 | 7  | NC11-22289      | 31.7  | 18.3 | 6.7  |
| 2015 | SUS | NAR15 | 8  | AR06024-7-2     | 21.7  | 15.0 | 6.8  |
| 2015 | SUS | NAR15 | 9  | AR06037-17-2    | 28.3  | 30.0 | 19.4 |
| 2015 | SUS | NAR15 | 10 | AR06045-2-4     | 21.7  | 25.0 | 16.2 |
| 2015 | SUS | NAR15 | 11 | AR06045-16-4    | 23.3  | 28.3 | 17.3 |
| 2015 | SUS | NAR15 | 12 | AR06046-10-3    | 28.3  | 50.0 | 28.2 |
| 2015 | SUS | NAR15 | 13 | AR06061-11-1    | 25.0  | 18.3 | 10.4 |
| 2015 | SUS | NAR15 | 14 | LW08190C-57-3   | 46.7  | 38.3 | 8.9  |
| 2015 | SUS | NAR15 | 15 | ARGE08-1398     | 6.7   | 4.0  | 3.5  |
| 2015 | SUS | NAR15 | 16 | B12-1792        | 55.0  | 48.3 | 26.3 |
| 2015 | SUS | NAR15 | 17 | B12-2180NC      | 33.3  | 33.3 | 19.8 |
| 2015 | SUS | NAR15 | 18 | GA071171-14ES8  | 50.0  | 48.3 | 19.7 |
| 2015 | SUS | NAR15 | 19 | GA071092-14ES11 | 66.7  | 48.3 | 24.9 |
| 2015 | SUS | NAR15 | 20 | GA071092-14ES13 | 68.3  | 50.0 | 24.6 |

|      |     |       |    |                    |      |      |      |
|------|-----|-------|----|--------------------|------|------|------|
| 2015 | SUS | NAR15 | 21 | GA081129-14ES16    | 70.0 | 45.0 | 17.9 |
| 2015 | SUS | NAR15 | 22 | GA08250-14ES7      | 43.3 | 50.0 | 18.1 |
| 2015 | SUS | NAR15 | 23 | GA08250-14ES5      | 45.0 | 40.0 | 22.1 |
| 2015 | SUS | NAR15 | 24 | GA071171-14ES19    | 53.3 | 40.0 | 22.0 |
| 2015 | SUS | NAR15 | 25 | GA081562-14ES14    | 31.7 | 38.3 | 27.2 |
| 2015 | SUS | NAR15 | 26 | KWS054             | 33.3 | 53.3 | 18.8 |
| 2015 | SUS | NAR15 | 27 | LA06146E-P4        | 45.0 | 43.3 | 20.2 |
| 2015 | SUS | NAR15 | 28 | LA08265C-50        | 38.3 | 33.3 | 11.0 |
| 2015 | SUS | NAR15 | 29 | LA09144C-6         | 73.3 | 50.0 | 22.6 |
| 2015 | SUS | NAR15 | 30 | LANC8248-1         | 73.3 | 23.3 | 10.0 |
| 2015 | SUS | NAR15 | 31 | ES13-1591          | 46.7 | 38.3 | 11.1 |
| 2015 | SUS | NAR15 | 32 | ES13-3423          | 73.3 | 46.7 | 16.8 |
| 2015 | SUS | NAR15 | 33 | ES12-3030          | 50.0 | 41.7 | 12.2 |
| 2015 | SUS | NAR15 | 34 | M11-2024           | 36.7 | 28.3 | 15.8 |
| 2015 | SUS | NAR15 | 35 | M12-3301           | 56.7 | 48.3 | 16.0 |
| 2015 | SUS | NAR15 | 36 | M12-2036           | 15.0 | 36.7 | 16.8 |
| 2015 | SUS | NAR15 | 37 | NC11-23084         | 71.7 | 50.0 | 14.7 |
| 2015 | SUS | NAR15 | 38 | NC12-23576         | 63.3 | 46.7 | 20.1 |
| 2015 | SUS | NAR15 | 39 | NC12-23219         | 41.7 | 21.7 | 11.4 |
| 2015 | SUS | NAR15 | 40 | NC12-20662         | 80.0 | 35.0 | 14.7 |
| 2015 | SUS | NAR15 | 41 | NC9305-7           | 31.7 | 21.7 | 11.8 |
| 2015 | SUS | NAR15 | 42 | VA11W-106          | 28.3 | 46.7 | 28.4 |
| 2015 | SUS | NAR15 | 43 | VA11W-313          | 68.3 | 78.3 | 16.5 |
| 2015 | SUS | NAR15 | 44 | VA12W-72           | 55.0 | 75.0 | 31.4 |
| 2015 | SUS | NAR15 | 45 | VA12W-54           | 75.0 | 60.0 | 18.0 |
| 2015 | SUS | NAR15 | 46 | VA12FHB-53         | 26.7 | 46.7 | 17.1 |
| 2015 | SUS | NAR15 | 47 | VA12FHB-4          | 33.3 | 33.3 | 10.7 |
| 2015 | SUS | NAR15 | 48 | VA13W-177          | 25.0 | 26.7 | 10.9 |
| 2015 | SUS | NAR15 | 49 | VA08MAS5-39-6-4    | 80.0 | 33.3 | 15.3 |
| 2014 | SUS | NC14  | 1  | ERNIE              | 11.0 | 4.3  | 4.4  |
| 2014 | SUS | NC14  | 2  | COKER9835          | 78.0 | 24.5 | 35.6 |
| 2014 | SUS | NC14  | 3  | BESS               | 27.0 | 8.1  | 8.3  |
| 2014 | SUS | NC14  | 4  | JAMESTOWN          | 13.0 | 2.9  | 2.5  |
| 2014 | SUS | NC14  | 5  | M10-1615           | 16.5 | 8.2  | 9.5  |
| 2014 | SUS | NC14  | 6  | AR00179-2-2        | 19.5 | 3.9  | 6.6  |
| 2014 | SUS | NC14  | 7  | AR00334-5-2        | 13.5 | 5.6  | 5.4  |
| 2014 | SUS | NC14  | 8  | AR01136-3-2        | 32.5 | 7.5  | 7.9  |
| 2014 | SUS | NC14  | 9  | AR04001-3          | 23.0 | 3.6  | 2.5  |
| 2014 | SUS | NC14  | 10 | AR04084-1-3        | 15.0 | 5.7  | 10.2 |
| 2014 | SUS | NC14  | 11 | ARGE07-1347-6-7-9  | 19.0 | 2.0  | 2.8  |
| 2014 | SUS | NC14  | 12 | ARGE07-1354-2-6-1  | 17.0 | 2.0  | 3.2  |
| 2014 | SUS | NC14  | 13 | ARGE07-1355-16-6-6 | 17.5 | 5.9  | 6.7  |
| 2014 | SUS | NC14  | 14 | ARS09-228          | 34.0 | 3.3  | 4.9  |
| 2014 | SUS | NC14  | 15 | ARS10-028          | 17.5 | 12.6 | 22.3 |
| 2014 | SUS | NC14  | 16 | ARS10-038          | 73.0 | 30.8 | 89.1 |
| 2014 | SUS | NC14  | 17 | ARS10-043          | 80.0 | 21.2 | 54.9 |
| 2014 | SUS | NC14  | 18 | ARS10-172          | 60.0 | 23.8 | 30.6 |
| 2014 | SUS | NC14  | 19 | ARS10-389          | 10.0 | 2.6  | 3.4  |
| 2014 | SUS | NC14  | 20 | B09-0002           | 10.5 | 1.3  | 3.1  |

|      |     |      |    |                     |      |      |      |
|------|-----|------|----|---------------------|------|------|------|
| 2014 | SUS | NC14 | 21 | B09-900256          | 63.0 | 17.7 | 17.6 |
| 2014 | SUS | NC14 | 22 | B08-91993           | 31.0 | 4.8  | 7.2  |
| 2014 | SUS | NC14 | 23 | GA04494-13ES1       | 65.0 | 11.4 | 19.4 |
| 2014 | SUS | NC14 | 24 | GA051477-13ES2      | 65.0 | 10.4 | 13.0 |
| 2014 | SUS | NC14 | 25 | GA051477-13ES4      | 35.5 | 6.0  | 5.1  |
| 2014 | SUS | NC14 | 26 | GA051207-13ES11     | 27.5 | 9.4  | 13.6 |
| 2014 | SUS | NC14 | 27 | GA061050-13ES18     | 30.0 | 14.8 | 20.8 |
| 2014 | SUS | NC14 | 28 | GA06586-13ES21      | 56.5 | 23.2 | 31.5 |
| 2014 | SUS | NC14 | 29 | GA06390-13ES24      | 30.5 | 14.3 | 17.3 |
| 2014 | SUS | NC14 | 30 | GA061050-13ES17     | 45.0 | 10.7 | 22.4 |
| 2014 | SUS | NC14 | 31 | KWS013              | 45.0 | 11.5 | 8.5  |
| 2014 | SUS | NC14 | 32 | KWS026              | 19.0 | 6.9  | 7.3  |
| 2014 | SUS | NC14 | 33 | KWS027              | 47.5 | 17.6 | 25.0 |
| 2014 | SUS | NC14 | 34 | LA06149C-P7         | 26.5 | 9.7  | 12.3 |
| 2014 | SUS | NC14 | 35 | LA08201C-57         | 18.5 | 7.4  | 11.0 |
| 2014 | SUS | NC14 | 36 | LANC8170-41-1       | 34.0 | 7.8  | 6.9  |
| 2014 | SUS | NC14 | 37 | LA07085CW-P4        | 19.0 | 3.2  | 1.9  |
| 2014 | SUS | NC14 | 38 | LANC8170-41-2       | 19.0 | 4.7  | 4.5  |
| 2014 | SUS | NC14 | 39 | LCS08577-4          | 51.5 | 15.2 | 23.3 |
| 2014 | SUS | NC14 | 40 | LCS229              | 50.0 | 10.6 | 21.9 |
| 2014 | SUS | NC14 | 41 | M09-9547            | 24.5 | 5.5  | 17.9 |
| 2014 | SUS | NC14 | 42 | M11-1027            | 32.0 | 11.0 | 15.0 |
| 2014 | SUS | NC14 | 43 | M11-2298            | 15.5 | 4.3  | 6.0  |
| 2014 | SUS | NC14 | 44 | MD08-22-22-13-4     | 30.0 | 1.5  | 3.5  |
| 2014 | SUS | NC14 | 45 | MD26-H2-23-13-1     | 10.5 | 1.5  | 3.3  |
| 2014 | SUS | NC14 | 46 | MD09W272-8-4-13-3   | 12.0 | 4.8  | 6.9  |
| 2014 | SUS | NC14 | 47 | MDC07026-F2-19-13-4 | 27.5 | 6.5  | 8.3  |
| 2014 | SUS | NC14 | 48 | NC11-21401          | 7.0  | 0.9  | 3.2  |
| 2014 | SUS | NC14 | 49 | NC11-22289          | 20.0 | 2.0  | 2.4  |
| 2014 | SUS | NC14 | 50 | NC11-22291          | 8.5  | 1.2  | 1.2  |
| 2014 | SUS | NC14 | 51 | NC8170-45-17        | 22.0 | 9.9  | 5.5  |
| 2014 | SUS | NC14 | 52 | NC8170-86-2         | 18.0 | 5.6  | 9.3  |
| 2014 | SUS | NC14 | 53 | NC9305-7            | 18.5 | 7.6  | 8.5  |
| 2014 | SUS | NC14 | 54 | NC09-21916          | 35.0 | 3.2  | 5.4  |
| 2014 | SUS | NC14 | 55 | VA10W-96            | 26.5 | 8.6  | 18.0 |
| 2014 | SUS | NC14 | 56 | VA11W-108           | 27.0 | 6.5  | 11.2 |
| 2014 | SUS | NC14 | 57 | VA11W-230           | 22.5 | 5.0  | 6.5  |
| 2014 | SUS | NC14 | 58 | VA11W-278           | 20.0 | 7.7  | 6.5  |
| 2014 | SUS | NC14 | 59 | VA12W-102           | 61.0 | 11.8 | 19.1 |
| 2014 | SUS | NC14 | 60 | VA12W-150           | 22.5 | 8.5  | 6.1  |
| 2014 | SUS | NC14 | 61 | VA12FHB-37          | 37.5 | 11.8 | 27.1 |
| 2014 | SUS | NC14 | 62 | VA12FHB-85          | 26.5 | 6.6  | 13.5 |
| 2014 | SUS | KY14 | 1  | ERNIE               | 38.6 | 23.6 | 12.3 |
| 2014 | SUS | KY14 | 2  | COKER9835           | 60.8 | 32.5 | 10.4 |
| 2014 | SUS | KY14 | 3  | BESS                | 32.8 | 14.1 | 10.0 |
| 2014 | SUS | KY14 | 4  | JAMESTOWN           | 31.6 | 26.3 | 17.2 |
| 2014 | SUS | KY14 | 5  | M10-1615            | 19.9 | 18.2 | 9.4  |
| 2014 | SUS | KY14 | 6  | AR00179-2-2         | 32.8 | 18.7 | 11.9 |
| 2014 | SUS | KY14 | 7  | AR00334-5-2         | 21.8 | 21.4 | 11.4 |



|      |     |      |    |                     |      |      |      |
|------|-----|------|----|---------------------|------|------|------|
| 2014 | SUS | KY14 | 8  | AR01136-3-2         | 31.8 | 25.2 | 10.6 |
| 2014 | SUS | KY14 | 9  | AR04001-3           | 31.2 | 19.0 | 12.8 |
| 2014 | SUS | KY14 | 10 | AR04084-1-3         | 43.8 | 24.8 | 22.0 |
| 2014 | SUS | KY14 | 11 | ARGE07-1347-6-7-9   | 18.4 | 15.4 | 10.4 |
| 2014 | SUS | KY14 | 12 | ARGE07-1354-2-6-1   | 31.6 | 20.9 | 13.6 |
| 2014 | SUS | KY14 | 13 | ARGE07-1355-16-6-6  | 30.4 | 21.5 | 16.4 |
| 2014 | SUS | KY14 | 14 | ARS09-228           | 46.1 | 35.7 | 8.9  |
| 2014 | SUS | KY14 | 15 | ARS10-028           | 36.0 | 26.3 | 22.9 |
| 2014 | SUS | KY14 | 16 | ARS10-038           | 58.3 | 40.0 | 14.1 |
| 2014 | SUS | KY14 | 17 | ARS10-043           | 31.6 | 23.9 | 14.3 |
| 2014 | SUS | KY14 | 18 | ARS10-172           | 43.8 | 37.7 | 11.9 |
| 2014 | SUS | KY14 | 19 | ARS10-389           | 15.3 | 17.7 | 6.1  |
| 2014 | SUS | KY14 | 20 | B09-0002            | 29.9 | 19.7 | 12.3 |
| 2014 | SUS | KY14 | 21 | B09-900256          | 47.0 | 30.9 | 12.9 |
| 2014 | SUS | KY14 | 22 | B08-91993           | 47.3 | 22.9 | 12.7 |
| 2014 | SUS | KY14 | 23 | GA04494-13ES1       | 65.5 | 40.1 | 24.1 |
| 2014 | SUS | KY14 | 24 | GA051477-13ES2      | 43.2 | 28.8 | 15.8 |
| 2014 | SUS | KY14 | 25 | GA051477-13ES4      | 40.6 | 35.6 | 15.5 |
| 2014 | SUS | KY14 | 26 | GA051207-13ES11     | 31.9 | 23.4 | 15.8 |
| 2014 | SUS | KY14 | 27 | GA061050-13ES18     | 46.2 | 36.9 | 19.9 |
| 2014 | SUS | KY14 | 28 | GA06586-13ES21      | 55.4 | 37.9 | 26.1 |
| 2014 | SUS | KY14 | 29 | GA06390-13ES24      | 36.6 | 28.6 | 24.4 |
| 2014 | SUS | KY14 | 30 | GA061050-13ES17     | 51.8 | 34.7 | 18.1 |
| 2014 | SUS | KY14 | 31 | KWS013              | 47.0 | 36.8 | 14.6 |
| 2014 | SUS | KY14 | 32 | KWS026              | 22.1 | 12.0 | 7.0  |
| 2014 | SUS | KY14 | 33 | KWS027              | 35.4 | 21.0 | 15.1 |
| 2014 | SUS | KY14 | 34 | LA06149C-P7         | 42.8 | 31.7 | 23.8 |
| 2014 | SUS | KY14 | 35 | LA08201C-57         | 39.4 | 22.4 | 19.2 |
| 2014 | SUS | KY14 | 36 | LANC8170-41-1       | 43.5 | 25.7 | 11.9 |
| 2014 | SUS | KY14 | 37 | LA07085CW-P4        | 40.7 | 23.9 | 12.9 |
| 2014 | SUS | KY14 | 38 | LANC8170-41-2       | 37.1 | 25.2 | 9.3  |
| 2014 | SUS | KY14 | 39 | LCS08577-4          | 45.4 | 36.8 | 10.3 |
| 2014 | SUS | KY14 | 40 | LCS229              | 29.0 | 27.9 | 11.2 |
| 2014 | SUS | KY14 | 41 | M09-9547            | 35.5 | 23.8 | 17.2 |
| 2014 | SUS | KY14 | 42 | M11-1027            | 36.4 | 24.8 | 8.1  |
| 2014 | SUS | KY14 | 43 | M11-2298            | 28.3 | 20.5 | 12.2 |
| 2014 | SUS | KY14 | 44 | MD08-22-22-13-4     | 19.2 | 4.3  | 5.3  |
| 2014 | SUS | KY14 | 45 | MD26-H2-23-13-1     | 33.1 | 19.1 | 12.9 |
| 2014 | SUS | KY14 | 46 | MD09W272-8-4-13-3   | 34.8 | 23.9 | 12.5 |
| 2014 | SUS | KY14 | 47 | MDC07026-F2-19-13-4 | 32.1 | 20.3 | 9.2  |
| 2014 | SUS | KY14 | 48 | NC11-21401          | 23.2 | 22.7 | 13.7 |
| 2014 | SUS | KY14 | 49 | NC11-22289          | 21.9 | 14.2 | 9.0  |
| 2014 | SUS | KY14 | 50 | NC11-22291          | 22.4 | 17.5 | 9.3  |
| 2014 | SUS | KY14 | 51 | NC8170-45-17        | 25.5 | 16.6 | 11.6 |
| 2014 | SUS | KY14 | 52 | NC8170-86-2         | 47.7 | 23.7 | 10.8 |
| 2014 | SUS | KY14 | 53 | NC9305-7            | 34.2 | 24.1 | 15.3 |
| 2014 | SUS | KY14 | 54 | NC09-21916          | 33.6 | 17.1 | 9.2  |
| 2014 | SUS | KY14 | 55 | VA10W-96            | 31.2 | 19.4 | 11.3 |
| 2014 | SUS | KY14 | 56 | VA11W-108           | 46.6 | 29.2 | 16.1 |

|      |     |      |    |                    |      |      |      |
|------|-----|------|----|--------------------|------|------|------|
| 2014 | SUS | KY14 | 57 | VA11W-230          | 39.7 | 27.3 | 7.0  |
| 2014 | SUS | KY14 | 58 | VA11W-278          | 55.3 | 33.4 | 14.7 |
| 2014 | SUS | KY14 | 59 | VA12W-102          | 39.0 | 25.6 | 6.6  |
| 2014 | SUS | KY14 | 60 | VA12W-150          | 42.5 | 23.6 | 10.3 |
| 2014 | SUS | KY14 | 61 | VA12FHB-37         | 33.9 | 29.9 | 17.1 |
| 2014 | SUS | KY14 | 62 | VA12FHB-85         | 22.5 | 19.6 | 13.9 |
| 2014 | SUS | VA14 | 1  | ERNIE              | 13.4 | 14.8 | 2.0  |
| 2014 | SUS | VA14 | 2  | COKER9835          | 85.9 | 35.9 | 7.3  |
| 2014 | SUS | VA14 | 3  | BESS               | 16.2 | 22.3 | 5.2  |
| 2014 | SUS | VA14 | 4  | JAMESTOWN          | 12.3 | 6.9  | 0.6  |
| 2014 | SUS | VA14 | 5  | M10-1615           | 11.6 | 5.7  | 1.4  |
| 2014 | SUS | VA14 | 6  | AR00179-2-2        | 15.4 | 8.4  | 6.9  |
| 2014 | SUS | VA14 | 7  | AR00334-5-2        | 14.0 | 5.5  | 0.8  |
| 2014 | SUS | VA14 | 8  | AR01136-3-2        | 12.1 | 19.7 | 2.0  |
| 2014 | SUS | VA14 | 9  | AR04001-3          | 10.3 | 11.0 | 0.6  |
| 2014 | SUS | VA14 | 10 | AR04084-1-3        | 19.2 | 11.5 | 2.0  |
| 2014 | SUS | VA14 | 11 | ARGE07-1347-6-7-9  | 11.1 | 27.6 | 12.6 |
| 2014 | SUS | VA14 | 12 | ARGE07-1354-2-6-1  | 12.8 | 23.7 | 3.5  |
| 2014 | SUS | VA14 | 13 | ARGE07-1355-16-6-6 | 19.0 | 8.0  | 1.0  |
| 2014 | SUS | VA14 | 14 | ARS09-228          | 8.8  | 12.4 | 0.5  |
| 2014 | SUS | VA14 | 15 | ARS10-028          | 22.9 | 14.6 | 2.4  |
| 2014 | SUS | VA14 | 16 | ARS10-038          | 72.7 | 26.9 | 12.2 |
| 2014 | SUS | VA14 | 17 | ARS10-043          | 17.8 | 13.8 | 2.3  |
| 2014 | SUS | VA14 | 18 | ARS10-172          | 57.9 | 23.4 | 5.4  |
| 2014 | SUS | VA14 | 19 | ARS10-389          | 8.2  | 13.0 | 0.1  |
| 2014 | SUS | VA14 | 20 | B09-0002           | 10.4 | 8.8  | 0.1  |
| 2014 | SUS | VA14 | 21 | B09-900256         | 27.6 | 29.2 | 6.6  |
| 2014 | SUS | VA14 | 22 | B08-91993          | 22.9 | 4.7  | 0.5  |
| 2014 | SUS | VA14 | 23 | GA04494-13ES1      | 26.5 | 23.5 | 2.6  |
| 2014 | SUS | VA14 | 24 | GA051477-13ES2     | 22.6 | 19.7 | 0.9  |
| 2014 | SUS | VA14 | 25 | GA051477-13ES4     | 16.1 | 8.2  | 1.1  |
| 2014 | SUS | VA14 | 26 | GA051207-13ES11    | 44.6 | 14.9 | 1.2  |
| 2014 | SUS | VA14 | 27 | GA061050-13ES18    | 21.0 | 18.1 | 4.4  |
| 2014 | SUS | VA14 | 28 | GA06586-13ES21     | 47.1 | 12.6 | 3.8  |
| 2014 | SUS | VA14 | 29 | GA06390-13ES24     | 19.1 | 32.8 | 2.0  |
| 2014 | SUS | VA14 | 30 | GA061050-13ES17    | 19.6 | 18.9 | 1.8  |
| 2014 | SUS | VA14 | 31 | KWS013             | 8.8  | 10.6 | 0.9  |
| 2014 | SUS | VA14 | 32 | KWS026             | 20.3 | 14.0 | 0.8  |
| 2014 | SUS | VA14 | 33 | KWS027             | 16.4 | 12.4 | 1.6  |
| 2014 | SUS | VA14 | 34 | LA06149C-P7        | 17.8 | 18.5 | 0.8  |
| 2014 | SUS | VA14 | 35 | LA08201C-57        | 34.7 | 12.3 | 0.9  |
| 2014 | SUS | VA14 | 36 | LANC8170-41-1      | 54.3 | 10.9 | 2.1  |
| 2014 | SUS | VA14 | 37 | LA07085CW-P4       | 21.0 | 20.8 | 1.1  |
| 2014 | SUS | VA14 | 38 | LANC8170-41-2      | 9.0  | 14.2 | 0.9  |
| 2014 | SUS | VA14 | 39 | LCS08577-4         | 37.0 | 21.3 | 2.2  |
| 2014 | SUS | VA14 | 40 | LCS229             | 26.4 | 14.0 | 1.3  |
| 2014 | SUS | VA14 | 41 | M09-9547           | 19.5 | 17.2 | 2.2  |
| 2014 | SUS | VA14 | 42 | M11-1027           | 19.8 | 25.6 | 2.0  |
| 2014 | SUS | VA14 | 43 | M11-2298           | 13.6 | 16.0 | 1.8  |

|      |     |       |    |                     |      |      |      |
|------|-----|-------|----|---------------------|------|------|------|
| 2014 | SUS | VA14  | 44 | MD08-22-22-13-4     | 17.4 | 11.5 | 2.2  |
| 2014 | SUS | VA14  | 45 | MD26-H2-23-13-1     | 7.9  | 6.3  | 0.1  |
| 2014 | SUS | VA14  | 46 | MD09W272-8-4-13-3   | 22.7 | 16.4 | 1.6  |
| 2014 | SUS | VA14  | 47 | MDC07026-F2-19-13-4 | 10.9 | 19.7 | 1.0  |
| 2014 | SUS | VA14  | 48 | NC11-21401          | 9.9  | 20.0 | 1.5  |
| 2014 | SUS | VA14  | 49 | NC11-22289          | 7.5  | 18.6 | 2.6  |
| 2014 | SUS | VA14  | 50 | NC11-22291          | 18.3 | 10.3 | NA   |
| 2014 | SUS | VA14  | 51 | NC8170-45-17        | 11.3 | 18.2 | 2.6  |
| 2014 | SUS | VA14  | 52 | NC8170-86-2         | 14.7 | 10.4 | 0.4  |
| 2014 | SUS | VA14  | 53 | NC9305-7            | 26.2 | 14.2 | 1.2  |
| 2014 | SUS | VA14  | 54 | NC09-21916          | 13.9 | 11.1 | 0.3  |
| 2014 | SUS | VA14  | 55 | VA10W-96            | 22.5 | 14.4 | 0.4  |
| 2014 | SUS | VA14  | 56 | VA11W-108           | 39.6 | 25.6 | 4.6  |
| 2014 | SUS | VA14  | 57 | VA11W-230           | 12.1 | 9.1  | 0.8  |
| 2014 | SUS | VA14  | 58 | VA11W-278           | 44.3 | 17.9 | 2.8  |
| 2014 | SUS | VA14  | 59 | VA12W-102           | 16.7 | 21.0 | 3.7  |
| 2014 | SUS | VA14  | 60 | VA12W-150           | 46.2 | 13.6 | 4.3  |
| 2014 | SUS | VA14  | 61 | VA12FHB-37          | 23.5 | 29.1 | 2.1  |
| 2014 | SUS | VA14  | 62 | VA12FHB-85          | 25.8 | 27.5 | 2.1  |
| 2014 | SUS | FAR14 | 1  | ERNIE               | 7.5  | 14.0 | 9.0  |
| 2014 | SUS | FAR14 | 2  | COKER9835           | 50.0 | 45.0 | 11.9 |
| 2014 | SUS | FAR14 | 3  | BESS                | 5.0  | 12.0 | 6.9  |
| 2014 | SUS | FAR14 | 4  | JAMESTOWN           | 5.0  | 26.5 | 3.0  |
| 2014 | SUS | FAR14 | 5  | M10-1615            | 12.5 | 29.0 | 5.9  |
| 2014 | SUS | FAR14 | 6  | AR00179-2-2         | 7.5  | 8.0  | 1.8  |
| 2014 | SUS | FAR14 | 7  | AR00334-5-2         | 7.5  | 25.0 | 6.9  |
| 2014 | SUS | FAR14 | 8  | AR01136-3-2         | 10.0 | 57.5 | 3.2  |
| 2014 | SUS | FAR14 | 9  | AR04001-3           | 15.0 | 30.0 | 6.5  |
| 2014 | SUS | FAR14 | 10 | AR04084-1-3         | 22.5 | 24.0 | 7.2  |
| 2014 | SUS | FAR14 | 11 | ARGE07-1347-6-7-9   | 5.0  | 23.5 | 4.8  |
| 2014 | SUS | FAR14 | 12 | ARGE07-1354-2-6-1   | 5.0  | 15.0 | 4.2  |
| 2014 | SUS | FAR14 | 13 | ARGE07-1355-16-6-6  | 10.0 | 15.0 | 6.4  |
| 2014 | SUS | FAR14 | 14 | ARS09-228           | 20.0 | 32.5 | 7.1  |
| 2014 | SUS | FAR14 | 15 | ARS10-028           | 10.0 | 27.5 | 6.4  |
| 2014 | SUS | FAR14 | 16 | ARS10-038           | 32.5 | 90.0 | 18.3 |
| 2014 | SUS | FAR14 | 17 | ARS10-043           | 30.0 | 60.0 | 8.6  |
| 2014 | SUS | FAR14 | 18 | ARS10-172           | 35.0 | 55.0 | 9.1  |
| 2014 | SUS | FAR14 | 19 | ARS10-389           | 7.5  | 19.0 | 4.4  |
| 2014 | SUS | FAR14 | 20 | B09-0002            | 7.5  | 6.0  | 2.4  |
| 2014 | SUS | FAR14 | 21 | B09-900256          | 30.0 | 75.0 | 10.8 |
| 2014 | SUS | FAR14 | 22 | B08-91993           | 30.0 | 47.5 | 11.4 |
| 2014 | SUS | FAR14 | 23 | GA04494-13ES1       | 40.0 | 67.5 | 13.2 |
| 2014 | SUS | FAR14 | 24 | GA051477-13ES2      | 32.5 | 32.5 | 7.7  |
| 2014 | SUS | FAR14 | 25 | GA051477-13ES4      | 30.0 | 40.0 | 6.3  |
| 2014 | SUS | FAR14 | 26 | GA051207-13ES11     | 25.0 | 50.0 | 7.1  |
| 2014 | SUS | FAR14 | 27 | GA061050-13ES18     | 70.0 | 52.5 | 14.9 |
| 2014 | SUS | FAR14 | 28 | GA06586-13ES21      | 57.5 | 70.0 | 23.9 |
| 2014 | SUS | FAR14 | 29 | GA06390-13ES24      | 25.0 | 67.5 | 9.5  |
| 2014 | SUS | FAR14 | 30 | GA061050-13ES17     | 37.5 | 30.0 | 12.0 |

|      |     |       |    |                     |      |      |      |
|------|-----|-------|----|---------------------|------|------|------|
| 2014 | SUS | FAR14 | 31 | KWS013              | NA   | 45.0 | 7.1  |
| 2014 | SUS | FAR14 | 32 | KWS026              | 22.5 | 12.5 | 2.6  |
| 2014 | SUS | FAR14 | 33 | KWS027              | 25.0 | 70.0 | 17.6 |
| 2014 | SUS | FAR14 | 34 | LA06149C-P7         | 10.0 | 35.0 | 4.3  |
| 2014 | SUS | FAR14 | 35 | LA08201C-57         | 22.5 | 31.0 | 8.4  |
| 2014 | SUS | FAR14 | 36 | LANC8170-41-1       | 37.5 | 37.5 | 5.2  |
| 2014 | SUS | FAR14 | 37 | LA07085CW-P4        | 12.5 | 37.5 | 6.2  |
| 2014 | SUS | FAR14 | 38 | LANC8170-41-2       | 30.0 | 17.5 | 3.0  |
| 2014 | SUS | FAR14 | 39 | LCS08577-4          | 65.0 | 34.0 | 7.6  |
| 2014 | SUS | FAR14 | 40 | LCS229              | 32.5 | 36.0 | 8.6  |
| 2014 | SUS | FAR14 | 41 | M09-9547            | 22.5 | 35.0 | 7.6  |
| 2014 | SUS | FAR14 | 42 | M11-1027            | 20.0 | 31.5 | 6.6  |
| 2014 | SUS | FAR14 | 43 | M11-2298            | 45.0 | 30.0 | 7.4  |
| 2014 | SUS | FAR14 | 44 | MD08-22-22-13-4     | 2.5  | 13.5 | 1.5  |
| 2014 | SUS | FAR14 | 45 | MD26-H2-23-13-1     | 7.5  | 31.5 | 5.3  |
| 2014 | SUS | FAR14 | 46 | MD09W272-8-4-13-3   | 17.5 | 35.0 | 4.2  |
| 2014 | SUS | FAR14 | 47 | MDC07026-F2-19-13-4 | 22.5 | 50.0 | 7.2  |
| 2014 | SUS | FAR14 | 48 | NC11-21401          | 25.0 | 52.5 | 3.1  |
| 2014 | SUS | FAR14 | 49 | NC11-22289          | 15.0 | 32.5 | 2.9  |
| 2014 | SUS | FAR14 | 50 | NC11-22291          | 12.5 | 30.0 | 3.5  |
| 2014 | SUS | FAR14 | 51 | NC8170-45-17        | 5.0  | 25.0 | 3.3  |
| 2014 | SUS | FAR14 | 52 | NC8170-86-2         | 17.5 | 65.0 | 5.5  |
| 2014 | SUS | FAR14 | 53 | NC9305-7            | 5.0  | 27.5 | 6.9  |
| 2014 | SUS | FAR14 | 54 | NC09-21916          | 20.0 | 27.5 | 3.2  |
| 2014 | SUS | FAR14 | 55 | VA10W-96            | 20.0 | 50.0 | 5.1  |
| 2014 | SUS | FAR14 | 56 | VA11W-108           | 7.5  | 62.5 | 6.8  |
| 2014 | SUS | FAR14 | 57 | VA11W-230           | 10.0 | 57.5 | 4.5  |
| 2014 | SUS | FAR14 | 58 | VA11W-278           | 32.5 | 60.0 | 7.9  |
| 2014 | SUS | FAR14 | 59 | VA12W-102           | 27.5 | 45.0 | 7.6  |
| 2014 | SUS | FAR14 | 60 | VA12W-150           | 32.5 | 47.5 | 8.3  |
| 2014 | SUS | FAR14 | 61 | VA12FHB-37          | 20.0 | 77.5 | 8.6  |
| 2014 | SUS | FAR14 | 62 | VA12FHB-85          | 30.0 | 70.0 | 10.8 |
| 2014 | SUS | FUN14 | 1  | ERNIE               | 33.2 | 48.0 | NA   |
| 2014 | SUS | FUN14 | 2  | COKER9835           | 43.5 | 83.7 | NA   |
| 2014 | SUS | FUN14 | 3  | BESS                | 27.2 | 31.4 | NA   |
| 2014 | SUS | FUN14 | 4  | JAMESTOWN           | 19.6 | 23.5 | NA   |
| 2014 | SUS | FUN14 | 5  | M10-1615            | 15.7 | 17.5 | NA   |
| 2014 | SUS | FUN14 | 6  | AR00179-2-2         | 18.5 | 18.7 | NA   |
| 2014 | SUS | FUN14 | 7  | AR00334-5-2         | 24.0 | 27.1 | NA   |
| 2014 | SUS | FUN14 | 8  | AR01136-3-2         | 19.2 | 21.8 | NA   |
| 2014 | SUS | FUN14 | 9  | AR04001-3           | 35.2 | 64.6 | NA   |
| 2014 | SUS | FUN14 | 10 | AR04084-1-3         | 27.4 | 55.2 | NA   |
| 2014 | SUS | FUN14 | 11 | ARGE07-1347-6-7-9   | 16.3 | 13.7 | NA   |
| 2014 | SUS | FUN14 | 12 | ARGE07-1354-2-6-1   | 22.3 | 29.1 | NA   |
| 2014 | SUS | FUN14 | 13 | ARGE07-1355-16-6-6  | 34.5 | 42.1 | NA   |
| 2014 | SUS | FUN14 | 14 | ARS09-228           | 28.5 | 51.4 | NA   |
| 2014 | SUS | FUN14 | 15 | ARS10-028           | 11.3 | 19.4 | NA   |
| 2014 | SUS | FUN14 | 16 | ARS10-038           | 64.4 | 43.5 | NA   |
| 2014 | SUS | FUN14 | 17 | ARS10-043           | 25.2 | 31.2 | NA   |

|      |     |       |    |                     |      |      |    |
|------|-----|-------|----|---------------------|------|------|----|
| 2014 | SUS | FUN14 | 18 | ARS10-172           | 42.6 | 50.1 | NA |
| 2014 | SUS | FUN14 | 19 | ARS10-389           | 25.9 | 48.5 | NA |
| 2014 | SUS | FUN14 | 20 | B09-0002            | 17.9 | 30.6 | NA |
| 2014 | SUS | FUN14 | 21 | B09-900256          | 22.6 | 42.6 | NA |
| 2014 | SUS | FUN14 | 22 | B08-91993           | 39.7 | 55.1 | NA |
| 2014 | SUS | FUN14 | 23 | GA04494-13ES1       | 55.7 | 74.6 | NA |
| 2014 | SUS | FUN14 | 24 | GA051477-13ES2      | 23.6 | 50.9 | NA |
| 2014 | SUS | FUN14 | 25 | GA051477-13ES4      | 26.0 | 51.3 | NA |
| 2014 | SUS | FUN14 | 26 | GA051207-13ES11     | 46.8 | 54.5 | NA |
| 2014 | SUS | FUN14 | 27 | GA061050-13ES18     | 35.7 | 58.2 | NA |
| 2014 | SUS | FUN14 | 28 | GA06586-13ES21      | 60.6 | 59.0 | NA |
| 2014 | SUS | FUN14 | 29 | GA06390-13ES24      | 26.6 | 56.0 | NA |
| 2014 | SUS | FUN14 | 30 | GA061050-13ES17     | 25.8 | 40.5 | NA |
| 2014 | SUS | FUN14 | 31 | KWS013              | NA   | NA   | NA |
| 2014 | SUS | FUN14 | 32 | KWS026              | NA   | NA   | NA |
| 2014 | SUS | FUN14 | 33 | KWS027              | NA   | NA   | NA |
| 2014 | SUS | FUN14 | 34 | LA06149C-P7         | 45.1 | 40.0 | NA |
| 2014 | SUS | FUN14 | 35 | LA08201C-57         | NA   | NA   | NA |
| 2014 | SUS | FUN14 | 36 | LANC8170-41-1       | 53.4 | 62.0 | NA |
| 2014 | SUS | FUN14 | 37 | LA07085CW-P4        | 18.2 | 49.0 | NA |
| 2014 | SUS | FUN14 | 38 | LANC8170-41-2       | 50.0 | 43.0 | NA |
| 2014 | SUS | FUN14 | 39 | LCS08577-4          | NA   | NA   | NA |
| 2014 | SUS | FUN14 | 40 | LCS229              | NA   | NA   | NA |
| 2014 | SUS | FUN14 | 41 | M09-9547            | 35.5 | 41.7 | NA |
| 2014 | SUS | FUN14 | 42 | M11-1027            | 23.2 | 37.7 | NA |
| 2014 | SUS | FUN14 | 43 | M11-2298            | 22.7 | 38.5 | NA |
| 2014 | SUS | FUN14 | 44 | MD08-22-22-13-4     | 13.4 | 27.2 | NA |
| 2014 | SUS | FUN14 | 45 | MD26-H2-23-13-1     | 14.2 | 20.3 | NA |
| 2014 | SUS | FUN14 | 46 | MD09W272-8-4-13-3   | 13.1 | 24.3 | NA |
| 2014 | SUS | FUN14 | 47 | MDC07026-F2-19-13-4 | 20.2 | 36.2 | NA |
| 2014 | SUS | FUN14 | 48 | NC11-21401          | 11.6 | 34.5 | NA |
| 2014 | SUS | FUN14 | 49 | NC11-22289          | 17.0 | 28.4 | NA |
| 2014 | SUS | FUN14 | 50 | NC11-22291          | 16.2 | 22.3 | NA |
| 2014 | SUS | FUN14 | 51 | NC8170-45-17        | 16.0 | 40.9 | NA |
| 2014 | SUS | FUN14 | 52 | NC8170-86-2         | 29.0 | 36.2 | NA |
| 2014 | SUS | FUN14 | 53 | NC9305-7            | 42.9 | 58.8 | NA |
| 2014 | SUS | FUN14 | 54 | NC09-21916          | 41.0 | 63.7 | NA |
| 2014 | SUS | FUN14 | 55 | VA10W-96            | 27.7 | 45.1 | NA |
| 2014 | SUS | FUN14 | 56 | VA11W-108           | 27.4 | 28.4 | NA |
| 2014 | SUS | FUN14 | 57 | VA11W-230           | 32.0 | 49.2 | NA |
| 2014 | SUS | FUN14 | 58 | VA11W-278           | 37.8 | 62.4 | NA |
| 2014 | SUS | FUN14 | 59 | VA12W-102           | 26.3 | 39.8 | NA |
| 2014 | SUS | FUN14 | 60 | VA12W-150           | 35.3 | 38.2 | NA |
| 2014 | SUS | FUN14 | 61 | VA12FHB-37          | 14.2 | 24.2 | NA |
| 2014 | SUS | FUN14 | 62 | VA12FHB-85          | 33.8 | 44.5 | NA |
| 2014 | SUS | LA14  | 1  | ERNIE               | 20.0 | 12.5 | NA |
| 2014 | SUS | LA14  | 2  | COKER9835           | 50.0 | 47.5 | NA |
| 2014 | SUS | LA14  | 3  | BESS                | 20.0 | 7.5  | NA |
| 2014 | SUS | LA14  | 4  | JAMESTOWN           | 15.0 | 5.0  | NA |

|      |     |      |    |                     |      |      |    |
|------|-----|------|----|---------------------|------|------|----|
| 2014 | SUS | LA14 | 5  | M10-1615            | 30.0 | 42.5 | NA |
| 2014 | SUS | LA14 | 6  | AR00179-2-2         | 25.0 | 22.5 | NA |
| 2014 | SUS | LA14 | 7  | AR00334-5-2         | 40.0 | 30.0 | NA |
| 2014 | SUS | LA14 | 8  | AR01136-3-2         | 30.0 | 20.0 | NA |
| 2014 | SUS | LA14 | 9  | AR04001-3           | 25.0 | 5.0  | NA |
| 2014 | SUS | LA14 | 10 | AR04084-1-3         | 30.0 | 10.0 | NA |
| 2014 | SUS | LA14 | 11 | ARGE07-1347-6-7-9   | 15.0 | 5.0  | NA |
| 2014 | SUS | LA14 | 12 | ARGE07-1354-2-6-1   | 20.0 | 5.0  | NA |
| 2014 | SUS | LA14 | 13 | ARGE07-1355-16-6-6  | 20.0 | 5.0  | NA |
| 2014 | SUS | LA14 | 14 | ARS09-228           | 25.0 | 15.0 | NA |
| 2014 | SUS | LA14 | 15 | ARS10-028           | 25.0 | 25.0 | NA |
| 2014 | SUS | LA14 | 16 | ARS10-038           | 55.0 | 60.0 | NA |
| 2014 | SUS | LA14 | 17 | ARS10-043           | 50.0 | 55.0 | NA |
| 2014 | SUS | LA14 | 18 | ARS10-172           | 45.0 | 30.0 | NA |
| 2014 | SUS | LA14 | 19 | ARS10-389           | 15.0 | 5.0  | NA |
| 2014 | SUS | LA14 | 20 | B09-0002            | 10.0 | 5.0  | NA |
| 2014 | SUS | LA14 | 21 | B09-900256          | 45.0 | 42.5 | NA |
| 2014 | SUS | LA14 | 22 | B08-91993           | 30.0 | 40.0 | NA |
| 2014 | SUS | LA14 | 23 | GA04494-13ES1       | 25.0 | 30.0 | NA |
| 2014 | SUS | LA14 | 24 | GA051477-13ES2      | 25.0 | 7.5  | NA |
| 2014 | SUS | LA14 | 25 | GA051477-13ES4      | 15.0 | 5.0  | NA |
| 2014 | SUS | LA14 | 26 | GA051207-13ES11     | 30.0 | 10.0 | NA |
| 2014 | SUS | LA14 | 27 | GA061050-13ES18     | 20.0 | 10.0 | NA |
| 2014 | SUS | LA14 | 28 | GA06586-13ES21      | 45.0 | 55.0 | NA |
| 2014 | SUS | LA14 | 29 | GA06390-13ES24      | 30.0 | 20.0 | NA |
| 2014 | SUS | LA14 | 30 | GA061050-13ES17     | 20.0 | 10.0 | NA |
| 2014 | SUS | LA14 | 31 | KWS013              | 40.0 | 32.5 | NA |
| 2014 | SUS | LA14 | 32 | KWS026              | 35.0 | 10.0 | NA |
| 2014 | SUS | LA14 | 33 | KWS027              | 35.0 | 32.5 | NA |
| 2014 | SUS | LA14 | 34 | LA06149C-P7         | 35.0 | 7.5  | NA |
| 2014 | SUS | LA14 | 35 | LA08201C-57         | 30.0 | 7.5  | NA |
| 2014 | SUS | LA14 | 36 | LANC8170-41-1       | 35.0 | 22.5 | NA |
| 2014 | SUS | LA14 | 37 | LA07085CW-P4        | 20.0 | 5.0  | NA |
| 2014 | SUS | LA14 | 38 | LANC8170-41-2       | 20.0 | 7.5  | NA |
| 2014 | SUS | LA14 | 39 | LCS08577-4          | 50.0 | 55.0 | NA |
| 2014 | SUS | LA14 | 40 | LCS229              | 50.0 | 37.5 | NA |
| 2014 | SUS | LA14 | 41 | M09-9547            | 30.0 | 47.5 | NA |
| 2014 | SUS | LA14 | 42 | M11-1027            | 30.0 | 12.5 | NA |
| 2014 | SUS | LA14 | 43 | M11-2298            | 10.0 | 5.0  | NA |
| 2014 | SUS | LA14 | 44 | MD08-22-22-13-4     | 25.0 | 5.0  | NA |
| 2014 | SUS | LA14 | 45 | MD26-H2-23-13-1     | 35.0 | 20.0 | NA |
| 2014 | SUS | LA14 | 46 | MD09W272-8-4-13-3   | 25.0 | 7.5  | NA |
| 2014 | SUS | LA14 | 47 | MDC07026-F2-19-13-4 | 25.0 | 10.0 | NA |
| 2014 | SUS | LA14 | 48 | NC11-21401          | 25.0 | 7.5  | NA |
| 2014 | SUS | LA14 | 49 | NC11-22289          | 12.5 | 5.0  | NA |
| 2014 | SUS | LA14 | 50 | NC11-22291          | 15.0 | 5.0  | NA |
| 2014 | SUS | LA14 | 51 | NC8170-45-17        | 15.0 | 5.0  | NA |
| 2014 | SUS | LA14 | 52 | NC8170-86-2         | 15.0 | 7.5  | NA |
| 2014 | SUS | LA14 | 53 | NC9305-7            | 25.0 | 10.0 | NA |

|      |     |       |    |                    |      |      |      |
|------|-----|-------|----|--------------------|------|------|------|
| 2014 | SUS | LA14  | 54 | NC09-21916         | 35.0 | 10.0 | NA   |
| 2014 | SUS | LA14  | 55 | VA10W-96           | 40.0 | 37.5 | NA   |
| 2014 | SUS | LA14  | 56 | VA11W-108          | 45.0 | 42.5 | NA   |
| 2014 | SUS | LA14  | 57 | VA11W-230          | 30.0 | 10.0 | NA   |
| 2014 | SUS | LA14  | 58 | VA11W-278          | 45.0 | 25.0 | NA   |
| 2014 | SUS | LA14  | 59 | VA12W-102          | 40.0 | 37.5 | NA   |
| 2014 | SUS | LA14  | 60 | VA12W-150          | 45.0 | 15.0 | NA   |
| 2014 | SUS | LA14  | 61 | VA12FHB-37         | 40.0 | 32.5 | NA   |
| 2014 | SUS | LA14  | 62 | VA12FHB-85         | 35.0 | 17.5 | NA   |
| 2014 | SUS | NAR14 | 1  | ERNIE              | 33.3 | 35.0 | 12.0 |
| 2014 | SUS | NAR14 | 2  | COKER9835          | 80.0 | 91.0 | 36.9 |
| 2014 | SUS | NAR14 | 3  | BESS               | 21.7 | 28.3 | 16.8 |
| 2014 | SUS | NAR14 | 4  | JAMESTOWN          | 41.7 | 32.7 | 16.2 |
| 2014 | SUS | NAR14 | 5  | M10-1615           | 25.0 | 30.0 | 19.1 |
| 2014 | SUS | NAR14 | 6  | AR00179-2-2        | 31.7 | 32.7 | 17.0 |
| 2014 | SUS | NAR14 | 7  | AR00334-5-2        | 30.0 | 37.3 | 18.6 |
| 2014 | SUS | NAR14 | 8  | AR01136-3-2        | 36.7 | 54.0 | 14.1 |
| 2014 | SUS | NAR14 | 9  | AR04001-3          | 43.3 | 45.0 | 13.6 |
| 2014 | SUS | NAR14 | 10 | AR04084-1-3        | 61.7 | 60.0 | 19.4 |
| 2014 | SUS | NAR14 | 11 | ARGE07-1347-6-7-9  | 25.0 | 43.3 | 10.5 |
| 2014 | SUS | NAR14 | 12 | ARGE07-1354-2-6-1  | 38.3 | 48.3 | 20.2 |
| 2014 | SUS | NAR14 | 13 | ARGE07-1355-16-6-6 | 31.7 | 29.3 | 15.9 |
| 2014 | SUS | NAR14 | 14 | ARS09-228          | 61.7 | 76.7 | 29.6 |
| 2014 | SUS | NAR14 | 15 | ARS10-028          | 56.7 | 85.0 | 36.0 |
| 2014 | SUS | NAR14 | 16 | ARS10-038          | 85.0 | 96.7 | 32.2 |
| 2014 | SUS | NAR14 | 17 | ARS10-043          | 68.3 | 68.3 | 25.5 |
| 2014 | SUS | NAR14 | 18 | ARS10-172          | 71.7 | 81.7 | 26.8 |
| 2014 | SUS | NAR14 | 19 | ARS10-389          | 33.3 | 33.3 | 11.2 |
| 2014 | SUS | NAR14 | 20 | B09-0002           | 23.3 | 23.3 | 11.3 |
| 2014 | SUS | NAR14 | 21 | B09-900256         | 66.7 | 83.3 | 24.2 |
| 2014 | SUS | NAR14 | 22 | B08-91993          | 45.0 | 50.0 | 17.0 |
| 2014 | SUS | NAR14 | 23 | GA04494-13ES1      | 76.7 | 88.3 | 23.5 |
| 2014 | SUS | NAR14 | 24 | GA051477-13ES2     | 75.0 | 58.3 | 21.7 |
| 2014 | SUS | NAR14 | 25 | GA051477-13ES4     | 68.3 | 51.7 | 21.2 |
| 2014 | SUS | NAR14 | 26 | GA051207-13ES11    | 46.7 | 60.0 | 22.4 |
| 2014 | SUS | NAR14 | 27 | GA061050-13ES18    | 61.7 | 68.3 | 30.4 |
| 2014 | SUS | NAR14 | 28 | GA06586-13ES21     | 70.0 | 76.7 | 34.3 |
| 2014 | SUS | NAR14 | 29 | GA06390-13ES24     | 68.3 | 81.7 | 29.8 |
| 2014 | SUS | NAR14 | 30 | GA061050-13ES17    | 70.0 | 81.7 | 33.0 |
| 2014 | SUS | NAR14 | 31 | KWS013             | 56.7 | 56.7 | 14.9 |
| 2014 | SUS | NAR14 | 32 | KWS026             | 38.3 | 23.3 | 9.9  |
| 2014 | SUS | NAR14 | 33 | KWS027             | 48.3 | 80.0 | 37.9 |
| 2014 | SUS | NAR14 | 34 | LA06149C-P7        | 56.7 | 61.7 | 29.2 |
| 2014 | SUS | NAR14 | 35 | LA08201C-57        | 58.3 | 46.7 | 9.8  |
| 2014 | SUS | NAR14 | 36 | LANC8170-41-1      | 65.0 | 58.3 | 8.2  |
| 2014 | SUS | NAR14 | 37 | LA07085CW-P4       | 53.3 | 66.7 | 13.4 |
| 2014 | SUS | NAR14 | 38 | LANC8170-41-2      | 55.0 | 48.3 | 6.1  |
| 2014 | SUS | NAR14 | 39 | LCS08577-4         | 66.7 | 61.7 | 13.8 |
| 2014 | SUS | NAR14 | 40 | LCS229             | 60.0 | 61.7 | 20.6 |

|      |     |       |    |                     |      |      |      |
|------|-----|-------|----|---------------------|------|------|------|
| 2014 | SUS | NAR14 | 41 | M09-9547            | 58.3 | 53.3 | 24.0 |
| 2014 | SUS | NAR14 | 42 | M11-1027            | 46.7 | 53.3 | 19.3 |
| 2014 | SUS | NAR14 | 43 | M11-2298            | 38.3 | 40.0 | 15.6 |
| 2014 | SUS | NAR14 | 44 | MD08-22-22-13-4     | 33.3 | 30.0 | 6.6  |
| 2014 | SUS | NAR14 | 45 | MD26-H2-23-13-1     | 26.7 | 38.3 | 12.8 |
| 2014 | SUS | NAR14 | 46 | MD09W272-8-4-13-3   | 48.3 | 71.7 | 16.5 |
| 2014 | SUS | NAR14 | 47 | MDC07026-F2-19-13-4 | 43.3 | 66.7 | 10.3 |
| 2014 | SUS | NAR14 | 48 | NC11-21401          | 38.3 | 38.3 | 9.5  |
| 2014 | SUS | NAR14 | 49 | NC11-22289          | 33.3 | 30.0 | 9.8  |
| 2014 | SUS | NAR14 | 50 | NC11-22291          | 28.3 | 26.0 | 9.7  |
| 2014 | SUS | NAR14 | 51 | NC8170-45-17        | 40.0 | 40.0 | 9.1  |
| 2014 | SUS | NAR14 | 52 | NC8170-86-2         | 55.0 | 45.0 | 12.5 |
| 2014 | SUS | NAR14 | 53 | NC9305-7            | 36.7 | 45.0 | 15.5 |
| 2014 | SUS | NAR14 | 54 | NC09-21916          | 46.7 | 56.7 | 18.5 |
| 2014 | SUS | NAR14 | 55 | VA10W-96            | 70.0 | 43.3 | 13.7 |
| 2014 | SUS | NAR14 | 56 | VA11W-108           | 58.3 | 70.0 | 17.5 |
| 2014 | SUS | NAR14 | 57 | VA11W-230           | 60.0 | 60.0 | 17.0 |
| 2014 | SUS | NAR14 | 58 | VA11W-278           | 63.3 | 71.7 | 15.8 |
| 2014 | SUS | NAR14 | 59 | VA12W-102           | 46.7 | 58.3 | 21.2 |
| 2014 | SUS | NAR14 | 60 | VA12W-150           | 56.7 | 58.3 | 26.3 |
| 2014 | SUS | NAR14 | 61 | VA12FHB-37          | 56.7 | 78.3 | 36.6 |
| 2014 | SUS | NAR14 | 62 | VA12FHB-85          | 48.3 | 65.0 | 26.9 |
